# Supplementary material
Source: publisher figshare collection journal article supplement (https://acs.figshare.com/ndownloader/files/4106071)
Supplement: Supplementary file 2 [file 4106071]

Archive with 9 entries (9 files):
- polyI-11s_sk3_pmdi12_0s-checkcif.pdf
- polyI-11s_sk3_pmdi12_0s.cif
- polyI-11s_sk3_pmdi12_0s.fcf
- polyII-11s_sk19_pmdi12_0s-checkcif.pdf
- polyII-11s_sk19_pmdi12_0s.cif
- polyII-11s_sk19_pmdi12_0s.fcf
- polyIII-11s_sk36_pmdi12melt_0s-checkcif.pdf
- polyIII-11s_sk36_pmdi12melt_0s.cif
- polyIII-11s_sk36_pmdi12melt_0s.fcf
