# Supplementary material
Source: publisher figshare collection journal article supplement (https://acs.figshare.com/ndownloader/files/4106071)
Supplement: Supplementary file 2 [file 4106071 › polyI-11s_sk3_pmdi12_0s.cif]

data_polyI_11s_sk3_pmdi12_0s
 
_audit_creation_method            SHELXL-97
_chemical_name_systematic
;
 ?
;
_chemical_name_common             ?
_chemical_melting_point           ?
_chemical_formula_moiety           'C34 H48 N2 O4'
_chemical_formula_sum
  'C34 H48 N2 O4'
_chemical_formula_weight         548.74
 
 
loop_
 _atom_type_symbol
 _atom_type_description
 _atom_type_scat_dispersion_real
 _atom_type_scat_dispersion_imag
 _atom_type_scat_source
 'C'  'C'   0.0033   0.0016
 'International Tables Vol C Tables 4.2.6.8 and 6.1.1.4'
 'H'  'H'   0.0000   0.0000
 'International Tables Vol C Tables 4.2.6.8 and 6.1.1.4'
 'N'  'N'   0.0061   0.0033
 'International Tables Vol C Tables 4.2.6.8 and 6.1.1.4'
 'O'  'O'   0.0106   0.0060
 'International Tables Vol C Tables 4.2.6.8 and 6.1.1.4'
 
_symmetry_cell_setting             Triclinic
_symmetry_space_group_name_H-M     P-1
_symmetry_space_group_name_Hall   '-P 1'
 
 
loop_
 _symmetry_equiv_pos_as_xyz
 'x, y, z'
 '-x, -y, -z'
 
_cell_length_a                    7.0557(2)
_cell_length_b                    7.6048(2)
_cell_length_c                    15.1267(5)
_cell_angle_alpha                 96.046(2)
_cell_angle_beta                  96.701(2)
_cell_angle_gamma                 106.3380(10)
_cell_volume                      765.39(4)
_cell_formula_units_Z             1.0
_cell_measurement_temperature     173(2)
_cell_measurement_reflns_used     3877
_cell_measurement_theta_min       2.74
_cell_measurement_theta_max       26.05
 
_exptl_crystal_description        plate
_exptl_crystal_colour             colourless
_exptl_crystal_size_max           0.64
_exptl_crystal_size_mid           0.35
_exptl_crystal_size_min           0.16
_exptl_crystal_density_meas       ?
_exptl_crystal_density_diffrn     1.191
_exptl_crystal_density_method     'not measured'
_exptl_crystal_F_000              298
_exptl_absorpt_coefficient_mu     0.077
_exptl_absorpt_correction_type    none
_exptl_absorpt_correction_T_min   ?
_exptl_absorpt_correction_T_max   ?
_exptl_absorpt_process_details    ?
 
_exptl_special_details
;
 ?
;
 
_diffrn_ambient_temperature       173(2)
_diffrn_radiation_wavelength      0.71073
_diffrn_radiation_type            MoK\a
_diffrn_radiation_source          'fine-focus sealed tube'
_diffrn_radiation_monochromator   graphite
_diffrn_measurement_device_type   'Bruker APEX-II CCD'
_diffrn_measurement_method        '\f and \w scans'
_diffrn_detector_area_resol_mean  ?
_diffrn_standards_number          0
_diffrn_standards_interval_count  ?
_diffrn_standards_interval_time   ?
_diffrn_standards_decay_%         ?
_diffrn_reflns_number             14393
_diffrn_reflns_av_R_equivalents   0.0514
_diffrn_reflns_av_sigmaI/netI     0.0524
_diffrn_reflns_limit_h_min        -9
_diffrn_reflns_limit_h_max        9
_diffrn_reflns_limit_k_min        -10
_diffrn_reflns_limit_k_max        10
_diffrn_reflns_limit_l_min        -19
_diffrn_reflns_limit_l_max        19
_diffrn_reflns_theta_min          1.37
_diffrn_reflns_theta_max          28.00
_reflns_number_total              3692
_reflns_number_gt                 2410
_reflns_threshold_expression      >2sigma(I)
 
_computing_data_collection        'Bruker APEX2'
_computing_cell_refinement        'Bruker SAINT'
_computing_data_reduction         'Bruker SAINT'
_computing_structure_solution     'SHELXS-97 (Sheldrick, 2008)'
_computing_structure_refinement   'SHELXL-97 (Sheldrick, 1997)'
_computing_molecular_graphics     'Bruker SHELXTL'
_computing_publication_material   'Bruker SHELXTL'
 
_refine_special_details
;
 Refinement of F^2^ against ALL reflections.  The weighted R-factor wR and
 goodness of fit S are based on F^2^, conventional R-factors R are based
 on F, with F set to zero for negative F^2^. The threshold expression of
 F^2^ > 2sigma(F^2^) is used only for calculating R-factors(gt) etc. and is
 not relevant to the choice of reflections for refinement.  R-factors based
 on F^2^ are statistically about twice as large as those based on F, and R-
 factors based on ALL data will be even larger.
;
 
_refine_ls_structure_factor_coef  Fsqd
_refine_ls_matrix_type            full
_refine_ls_weighting_scheme       calc
_refine_ls_weighting_details
 'calc w=1/[\s^2^(Fo^2^)+(0.0507P)^2^+0.0000P] where P=(Fo^2^+2Fc^2^)/3'
_atom_sites_solution_primary      direct
_atom_sites_solution_secondary    difmap
_atom_sites_solution_hydrogens    geom
_refine_ls_hydrogen_treatment     constr
_refine_ls_extinction_method      none
_refine_ls_extinction_coef        ?
_refine_ls_number_reflns          3692
_refine_ls_number_parameters      181
_refine_ls_number_restraints      0
_refine_ls_R_factor_all           0.0773
_refine_ls_R_factor_gt            0.0443
_refine_ls_wR_factor_ref          0.1085
_refine_ls_wR_factor_gt           0.0981
_refine_ls_goodness_of_fit_ref    1.029
_refine_ls_restrained_S_all       1.029
_refine_ls_shift/su_max           0.003
_refine_ls_shift/su_mean          0.001
 
loop_
 _atom_site_label
 _atom_site_type_symbol
 _atom_site_fract_x
 _atom_site_fract_y
 _atom_site_fract_z
 _atom_site_U_iso_or_equiv
 _atom_site_adp_type
 _atom_site_occupancy
 _atom_site_symmetry_multiplicity
 _atom_site_calc_flag
 _atom_site_refinement_flags
 _atom_site_disorder_assembly
 _atom_site_disorder_group
N1 N 0.72032(15) 0.24914(13) 0.13517(7) 0.0276(3) Uani 1 1 d . . .
O1 O 0.60316(15) 0.50615(13) 0.14640(7) 0.0456(3) Uani 1 1 d . . .
O2 O 0.89924(14) 0.04895(12) 0.09529(6) 0.0355(3) Uani 1 1 d . . .
C1 C 0.61140(19) 0.13967(17) 0.19855(9) 0.0288(3) Uani 1 1 d . . .
H1 H 0.6407 0.0181 0.1926 0.035 Uiso 1 1 calc R . .
C2 C 0.6952(2) 0.23420(18) 0.29535(9) 0.0349(3) Uani 1 1 d . . .
H2A H 0.7286 0.3700 0.2966 0.042 Uiso 1 1 calc R . .
H2B H 0.5901 0.1971 0.3336 0.042 Uiso 1 1 calc R . .
C3 C 0.8805(2) 0.1877(2) 0.33533(10) 0.0415(4) Uani 1 1 d . . .
H3A H 0.9431 0.2750 0.3912 0.050 Uiso 1 1 calc R . .
H3B H 0.9776 0.2069 0.2924 0.050 Uiso 1 1 calc R . .
C4 C 0.8398(2) -0.0097(2) 0.35701(9) 0.0392(4) Uani 1 1 d . . .
H4A H 0.7609 -0.0968 0.3034 0.047 Uiso 1 1 calc R . .
H4B H 0.9688 -0.0366 0.3701 0.047 Uiso 1 1 calc R . .
C5 C 0.7274(2) -0.0436(2) 0.43668(9) 0.0412(4) Uani 1 1 d . . .
H5A H 0.6098 0.0027 0.4277 0.049 Uiso 1 1 calc R . .
H5B H 0.8156 0.0303 0.4918 0.049 Uiso 1 1 calc R . .
C6 C 0.6560(2) -0.2457(2) 0.45223(10) 0.0496(4) Uani 1 1 d . . .
H6A H 0.7726 -0.2939 0.4588 0.060 Uiso 1 1 calc R . .
H6B H 0.6010 -0.2504 0.5095 0.060 Uiso 1 1 calc R . .
C7 C 0.4979(2) -0.3723(2) 0.37763(11) 0.0483(4) Uani 1 1 d . . .
H7A H 0.4725 -0.5014 0.3903 0.058 Uiso 1 1 calc R . .
H7B H 0.5524 -0.3655 0.3202 0.058 Uiso 1 1 calc R . .
C8 C 0.2987(2) -0.3287(2) 0.36526(10) 0.0453(4) Uani 1 1 d . . .
H8A H 0.2091 -0.4010 0.4029 0.054 Uiso 1 1 calc R . .
H8B H 0.3223 -0.1957 0.3869 0.054 Uiso 1 1 calc R . .
C9 C 0.1940(2) -0.3722(2) 0.26783(10) 0.0472(4) Uani 1 1 d . . .
H9A H 0.0547 -0.3681 0.2666 0.057 Uiso 1 1 calc R . .
H9B H 0.1890 -0.4995 0.2431 0.057 Uiso 1 1 calc R . .
C10 C 0.2978(2) -0.23745(19) 0.20793(10) 0.0386(4) Uani 1 1 d . . .
H10A H 0.4430 -0.2223 0.2187 0.046 Uiso 1 1 calc R . .
H10B H 0.2473 -0.2914 0.1441 0.046 Uiso 1 1 calc R . .
C11 C 0.2656(2) -0.0482(2) 0.22421(11) 0.0424(4) Uani 1 1 d . . .
H11A H 0.3014 -0.0014 0.2894 0.051 Uiso 1 1 calc R . .
H11B H 0.1217 -0.0625 0.2071 0.051 Uiso 1 1 calc R . .
C12 C 0.3860(2) 0.0976(2) 0.17264(11) 0.0412(4) Uani 1 1 d . . .
H12A H 0.3491 0.0528 0.1073 0.049 Uiso 1 1 calc R . .
H12B H 0.3495 0.2135 0.1847 0.049 Uiso 1 1 calc R . .
C13 C 0.70897(19) 0.42258(17) 0.11619(9) 0.0305(3) Uani 1 1 d . . .
C14 C 0.85552(18) 0.48112(16) 0.05338(8) 0.0255(3) Uani 1 1 d . . .
C15 C 0.94954(18) 0.34492(16) 0.03932(8) 0.0243(3) Uani 1 1 d . . .
C16 C 0.86060(18) 0.19321(17) 0.09097(8) 0.0258(3) Uani 1 1 d . . .
C17 C 0.90214(19) 0.64206(16) 0.01415(8) 0.0276(3) Uani 1 1 d . . .
H17 H 0.8377 0.7352 0.0233 0.033 Uiso 1 1 calc R . .
 
loop_
 _atom_site_aniso_label
 _atom_site_aniso_U_11
 _atom_site_aniso_U_22
 _atom_site_aniso_U_33
 _atom_site_aniso_U_23
 _atom_site_aniso_U_13
 _atom_site_aniso_U_12
N1 0.0320(6) 0.0246(6) 0.0326(6) 0.0133(5) 0.0130(5) 0.0120(5)
O1 0.0579(7) 0.0397(6) 0.0596(7) 0.0242(5) 0.0362(6) 0.0300(5)
O2 0.0474(6) 0.0250(5) 0.0437(6) 0.0155(4) 0.0181(5) 0.0181(4)
C1 0.0313(7) 0.0268(7) 0.0329(8) 0.0152(6) 0.0124(6) 0.0090(6)
C2 0.0455(9) 0.0287(7) 0.0343(8) 0.0116(6) 0.0163(7) 0.0107(7)
C3 0.0376(8) 0.0458(9) 0.0360(9) 0.0105(7) 0.0071(7) 0.0021(7)
C4 0.0359(8) 0.0529(9) 0.0338(8) 0.0170(7) 0.0061(6) 0.0171(7)
C5 0.0462(9) 0.0521(9) 0.0283(8) 0.0128(7) 0.0071(7) 0.0161(8)
C6 0.0643(11) 0.0595(11) 0.0384(9) 0.0262(8) 0.0156(8) 0.0299(9)
C7 0.0725(11) 0.0365(8) 0.0475(10) 0.0207(7) 0.0243(9) 0.0232(8)
C8 0.0559(10) 0.0374(8) 0.0446(9) 0.0148(7) 0.0239(8) 0.0073(8)
C9 0.0480(9) 0.0368(9) 0.0497(10) 0.0094(7) 0.0141(8) -0.0024(7)
C10 0.0357(8) 0.0404(8) 0.0350(8) 0.0093(7) 0.0062(6) 0.0019(7)
C11 0.0273(7) 0.0510(9) 0.0553(10) 0.0254(8) 0.0142(7) 0.0120(7)
C12 0.0345(8) 0.0464(9) 0.0510(9) 0.0255(7) 0.0132(7) 0.0160(7)
C13 0.0361(8) 0.0281(7) 0.0339(8) 0.0116(6) 0.0129(6) 0.0143(6)
C14 0.0309(7) 0.0233(6) 0.0249(7) 0.0068(5) 0.0081(6) 0.0093(6)
C15 0.0305(7) 0.0192(6) 0.0246(7) 0.0065(5) 0.0052(5) 0.0080(5)
C16 0.0306(7) 0.0231(6) 0.0245(7) 0.0069(5) 0.0047(5) 0.0082(6)
C17 0.0349(7) 0.0222(6) 0.0316(7) 0.0089(5) 0.0105(6) 0.0140(6)
 
_geom_special_details
;
 All esds (except the esd in the dihedral angle between two l.s. planes)
 are estimated using the full covariance matrix.  The cell esds are taken
 into account individually in the estimation of esds in distances, angles
 and torsion angles; correlations between esds in cell parameters are only
 used when they are defined by crystal symmetry.  An approximate (isotropic)
 treatment of cell esds is used for estimating esds involving l.s. planes.
;
 
loop_
 _geom_bond_atom_site_label_1
 _geom_bond_atom_site_label_2
 _geom_bond_distance
 _geom_bond_site_symmetry_2
 _geom_bond_publ_flag
N1 C16 1.3925(16) . ?
N1 C13 1.4008(15) . ?
N1 C1 1.4775(15) . ?
O1 C13 1.2064(15) . ?
O2 C16 1.2088(13) . ?
C1 C12 1.5257(18) . ?
C1 C2 1.5321(18) . ?
C1 H1 1.0000 . ?
C2 C3 1.5233(19) . ?
C2 H2A 0.9900 . ?
C2 H2B 0.9900 . ?
C3 C4 1.5252(19) . ?
C3 H3A 0.9900 . ?
C3 H3B 0.9900 . ?
C4 C5 1.5234(19) . ?
C4 H4A 0.9900 . ?
C4 H4B 0.9900 . ?
C5 C6 1.5298(19) . ?
C5 H5A 0.9900 . ?
C5 H5B 0.9900 . ?
C6 C7 1.522(2) . ?
C6 H6A 0.9900 . ?
C6 H6B 0.9900 . ?
C7 C8 1.528(2) . ?
C7 H7A 0.9900 . ?
C7 H7B 0.9900 . ?
C8 C9 1.527(2) . ?
C8 H8A 0.9900 . ?
C8 H8B 0.9900 . ?
C9 C10 1.5282(19) . ?
C9 H9A 0.9900 . ?
C9 H9B 0.9900 . ?
C10 C11 1.519(2) . ?
C10 H10A 0.9900 . ?
C10 H10B 0.9900 . ?
C11 C12 1.5384(18) . ?
C11 H11A 0.9900 . ?
C11 H11B 0.9900 . ?
C12 H12A 0.9900 . ?
C12 H12B 0.9900 . ?
C13 C14 1.4932(17) . ?
C14 C17 1.3893(16) . ?
C14 C15 1.3897(16) . ?
C15 C17 1.3839(17) 2_765 ?
C15 C16 1.4941(16) . ?
C17 C15 1.3839(17) 2_765 ?
C17 H17 0.9500 . ?
 
loop_
 _geom_angle_atom_site_label_1
 _geom_angle_atom_site_label_2
 _geom_angle_atom_site_label_3
 _geom_angle
 _geom_angle_site_symmetry_1
 _geom_angle_site_symmetry_3
 _geom_angle_publ_flag
C16 N1 C13 111.60(10) . . ?
C16 N1 C1 122.13(9) . . ?
C13 N1 C1 126.13(10) . . ?
N1 C1 C12 111.11(10) . . ?
N1 C1 C2 109.78(10) . . ?
C12 C1 C2 115.09(11) . . ?
N1 C1 H1 106.8 . . ?
C12 C1 H1 106.8 . . ?
C2 C1 H1 106.8 . . ?
C3 C2 C1 113.81(11) . . ?
C3 C2 H2A 108.8 . . ?
C1 C2 H2A 108.8 . . ?
C3 C2 H2B 108.8 . . ?
C1 C2 H2B 108.8 . . ?
H2A C2 H2B 107.7 . . ?
C2 C3 C4 114.29(11) . . ?
C2 C3 H3A 108.7 . . ?
C4 C3 H3A 108.7 . . ?
C2 C3 H3B 108.7 . . ?
C4 C3 H3B 108.7 . . ?
H3A C3 H3B 107.6 . . ?
C5 C4 C3 113.43(12) . . ?
C5 C4 H4A 108.9 . . ?
C3 C4 H4A 108.9 . . ?
C5 C4 H4B 108.9 . . ?
C3 C4 H4B 108.9 . . ?
H4A C4 H4B 107.7 . . ?
C4 C5 C6 115.25(13) . . ?
C4 C5 H5A 108.5 . . ?
C6 C5 H5A 108.5 . . ?
C4 C5 H5B 108.5 . . ?
C6 C5 H5B 108.5 . . ?
H5A C5 H5B 107.5 . . ?
C7 C6 C5 114.45(11) . . ?
C7 C6 H6A 108.6 . . ?
C5 C6 H6A 108.6 . . ?
C7 C6 H6B 108.6 . . ?
C5 C6 H6B 108.6 . . ?
H6A C6 H6B 107.6 . . ?
C6 C7 C8 115.28(13) . . ?
C6 C7 H7A 108.5 . . ?
C8 C7 H7A 108.5 . . ?
C6 C7 H7B 108.5 . . ?
C8 C7 H7B 108.5 . . ?
H7A C7 H7B 107.5 . . ?
C9 C8 C7 113.47(13) . . ?
C9 C8 H8A 108.9 . . ?
C7 C8 H8A 108.9 . . ?
C9 C8 H8B 108.9 . . ?
C7 C8 H8B 108.9 . . ?
H8A C8 H8B 107.7 . . ?
C8 C9 C10 113.01(12) . . ?
C8 C9 H9A 109.0 . . ?
C10 C9 H9A 109.0 . . ?
C8 C9 H9B 109.0 . . ?
C10 C9 H9B 109.0 . . ?
H9A C9 H9B 107.8 . . ?
C11 C10 C9 113.33(12) . . ?
C11 C10 H10A 108.9 . . ?
C9 C10 H10A 108.9 . . ?
C11 C10 H10B 108.9 . . ?
C9 C10 H10B 108.9 . . ?
H10A C10 H10B 107.7 . . ?
C10 C11 C12 114.85(12) . . ?
C10 C11 H11A 108.6 . . ?
C12 C11 H11A 108.6 . . ?
C10 C11 H11B 108.6 . . ?
C12 C11 H11B 108.6 . . ?
H11A C11 H11B 107.5 . . ?
C1 C12 C11 112.91(11) . . ?
C1 C12 H12A 109.0 . . ?
C11 C12 H12A 109.0 . . ?
C1 C12 H12B 109.0 . . ?
C11 C12 H12B 109.0 . . ?
H12A C12 H12B 107.8 . . ?
O1 C13 N1 125.99(12) . . ?
O1 C13 C14 128.05(11) . . ?
N1 C13 C14 105.95(10) . . ?
C17 C14 C15 122.56(11) . . ?
C17 C14 C13 129.16(11) . . ?
C15 C14 C13 108.27(10) . . ?
C17 C15 C14 123.18(11) 2_765 . ?
C17 C15 C16 129.20(11) 2_765 . ?
C14 C15 C16 107.62(10) . . ?
O2 C16 N1 125.19(11) . . ?
O2 C16 C15 128.27(12) . . ?
N1 C16 C15 106.53(10) . . ?
C15 C17 C14 114.26(11) 2_765 . ?
C15 C17 H17 122.9 2_765 . ?
C14 C17 H17 122.9 . . ?
 
loop_
 _geom_torsion_atom_site_label_1
 _geom_torsion_atom_site_label_2
 _geom_torsion_atom_site_label_3
 _geom_torsion_atom_site_label_4
 _geom_torsion
 _geom_torsion_site_symmetry_1
 _geom_torsion_site_symmetry_2
 _geom_torsion_site_symmetry_3
 _geom_torsion_site_symmetry_4
 _geom_torsion_publ_flag
C16 N1 C1 C12 -126.13(13) . . . . ?
C13 N1 C1 C12 58.43(17) . . . . ?
C16 N1 C1 C2 105.42(13) . . . . ?
C13 N1 C1 C2 -70.02(15) . . . . ?
N1 C1 C2 C3 -83.74(13) . . . . ?
C12 C1 C2 C3 150.04(11) . . . . ?
C1 C2 C3 C4 -71.58(15) . . . . ?
C2 C3 C4 C5 -70.53(16) . . . . ?
C3 C4 C5 C6 171.26(11) . . . . ?
C4 C5 C6 C7 -65.61(17) . . . . ?
C5 C6 C7 C8 -64.45(17) . . . . ?
C6 C7 C8 C9 147.58(12) . . . . ?
C7 C8 C9 C10 -71.41(16) . . . . ?
C8 C9 C10 C11 -74.08(16) . . . . ?
C9 C10 C11 C12 173.70(12) . . . . ?
N1 C1 C12 C11 168.20(11) . . . . ?
C2 C1 C12 C11 -66.26(16) . . . . ?
C10 C11 C12 C1 -61.95(17) . . . . ?
C16 N1 C13 O1 -178.60(14) . . . . ?
C1 N1 C13 O1 -2.8(2) . . . . ?
C16 N1 C13 C14 0.41(14) . . . . ?
C1 N1 C13 C14 176.25(11) . . . . ?
O1 C13 C14 C17 -1.1(2) . . . . ?
N1 C13 C14 C17 179.90(12) . . . . ?
O1 C13 C14 C15 177.70(14) . . . . ?
N1 C13 C14 C15 -1.28(14) . . . . ?
C17 C14 C15 C17 0.4(2) . . . 2_765 ?
C13 C14 C15 C17 -178.47(12) . . . 2_765 ?
C17 C14 C15 C16 -179.49(11) . . . . ?
C13 C14 C15 C16 1.60(14) . . . . ?
C13 N1 C16 O2 -179.59(12) . . . . ?
C1 N1 C16 O2 4.4(2) . . . . ?
C13 N1 C16 C15 0.55(14) . . . . ?
C1 N1 C16 C15 -175.49(10) . . . . ?
C17 C15 C16 O2 -1.1(2) 2_765 . . . ?
C14 C15 C16 O2 178.79(13) . . . . ?
C17 C15 C16 N1 178.72(13) 2_765 . . . ?
C14 C15 C16 N1 -1.36(14) . . . . ?
C15 C14 C17 C15 -0.4(2) . . . 2_765 ?
C13 C14 C17 C15 178.26(13) . . . 2_765 ?
 
_diffrn_measured_fraction_theta_max    0.999
_diffrn_reflns_theta_full              28.00
_diffrn_measured_fraction_theta_full   0.999
_refine_diff_density_max    0.221
_refine_diff_density_min   -0.211
_refine_diff_density_rms    0.044

_iucr_refine_instructions_details
;
TITL 11s_sk3_pmdi12_0s in P-1
CELL  0.71073   7.0557   7.6048  15.1267   96.046   96.701  106.338
ZERR     0.50   0.0002   0.0002   0.0005    0.002    0.002    0.001
LATT   1
SFAC  C    H    N    O
UNIT  34   48   2    4
MERG   2
OMIT    -2.00  56.00
FMAP   2
PLAN   20
SIZE     0.16   0.35   0.64
ACTA
HTAB    2.00000
BOND   $H
CONF
TEMP -100
L.S.   4
WGHT    0.050700
FVAR       0.60421
N1    3    0.720318    0.249141    0.135169    11.00000    0.03202    0.02456 =
         0.03258    0.01328    0.01296    0.01202
O1    4    0.603160    0.506153    0.146395    11.00000    0.05789    0.03975 =
         0.05960    0.02418    0.03620    0.03003
O2    4    0.899236    0.048953    0.095292    11.00000    0.04738    0.02504 =
         0.04369    0.01545    0.01806    0.01809
C1    1    0.611403    0.139674    0.198551    11.00000    0.03127    0.02683 =
         0.03294    0.01515    0.01244    0.00897
AFIX  13
H1    2    0.640653    0.018077    0.192564    11.00000   -1.20000
AFIX   0
C2    1    0.695181    0.234198    0.295347    11.00000    0.04550    0.02870 =
         0.03429    0.01164    0.01633    0.01067
AFIX  23
H2A   2    0.728624    0.369995    0.296646    11.00000   -1.20000
H2B   2    0.590114    0.197075    0.333565    11.00000   -1.20000
AFIX   0
C3    1    0.880457    0.187686    0.335327    11.00000    0.03757    0.04578 =
         0.03604    0.01055    0.00712    0.00206
AFIX  23
H3A   2    0.943109    0.274985    0.391205    11.00000   -1.20000
H3B   2    0.977600    0.206934    0.292409    11.00000   -1.20000
AFIX   0
C4    1    0.839796   -0.009687    0.357012    11.00000    0.03589    0.05293 =
         0.03379    0.01700    0.00607    0.01707
AFIX  23
H4A   2    0.760946   -0.096817    0.303412    11.00000   -1.20000
H4B   2    0.968756   -0.036579    0.370097    11.00000   -1.20000
AFIX   0
C5    1    0.727436   -0.043563    0.436683    11.00000    0.04618    0.05215 =
         0.02826    0.01280    0.00713    0.01610
AFIX  23
H5A   2    0.609752    0.002728    0.427681    11.00000   -1.20000
H5B   2    0.815554    0.030297    0.491754    11.00000   -1.20000
AFIX   0
C6    1    0.655974   -0.245694    0.452227    11.00000    0.06431    0.05951 =
         0.03840    0.02624    0.01559    0.02989
AFIX  23
H6A   2    0.772642   -0.293878    0.458841    11.00000   -1.20000
H6B   2    0.600985   -0.250388    0.509520    11.00000   -1.20000
AFIX   0
C7    1    0.497934   -0.372316    0.377629    11.00000    0.07253    0.03648 =
         0.04749    0.02069    0.02431    0.02319
AFIX  23
H7A   2    0.472511   -0.501357    0.390254    11.00000   -1.20000
H7B   2    0.552422   -0.365483    0.320245    11.00000   -1.20000
AFIX   0
C8    1    0.298662   -0.328711    0.365262    11.00000    0.05585    0.03740 =
         0.04459    0.01482    0.02386    0.00734
AFIX  23
H8A   2    0.209146   -0.401026    0.402907    11.00000   -1.20000
H8B   2    0.322332   -0.195744    0.386912    11.00000   -1.20000
AFIX   0
C9    1    0.193991   -0.372154    0.267831    11.00000    0.04797    0.03680 =
         0.04970    0.00937    0.01407   -0.00241
AFIX  23
H9A   2    0.054693   -0.368113    0.266593    11.00000   -1.20000
H9B   2    0.189000   -0.499455    0.243070    11.00000   -1.20000
AFIX   0
C10   1    0.297827   -0.237453    0.207927    11.00000    0.03566    0.04038 =
         0.03498    0.00927    0.00621    0.00189
AFIX  23
H10A  2    0.443033   -0.222292    0.218678    11.00000   -1.20000
H10B  2    0.247346   -0.291362    0.144146    11.00000   -1.20000
AFIX   0
C11   1    0.265589   -0.048163    0.224215    11.00000    0.02731    0.05099 =
         0.05528    0.02545    0.01423    0.01203
AFIX  23
H11A  2    0.301378   -0.001366    0.289400    11.00000   -1.20000
H11B  2    0.121685   -0.062531    0.207119    11.00000   -1.20000
AFIX   0
C12   1    0.385974    0.097644    0.172641    11.00000    0.03452    0.04644 =
         0.05101    0.02546    0.01320    0.01599
AFIX  23
H12A  2    0.349065    0.052773    0.107299    11.00000   -1.20000
H12B  2    0.349512    0.213492    0.184662    11.00000   -1.20000
AFIX   0
C13   1    0.708969    0.422581    0.116191    11.00000    0.03611    0.02805 =
         0.03392    0.01160    0.01294    0.01430
C14   1    0.855520    0.481124    0.053378    11.00000    0.03087    0.02331 =
         0.02489    0.00681    0.00808    0.00932
C15   1    0.949543    0.344918    0.039320    11.00000    0.03053    0.01921 =
         0.02459    0.00654    0.00517    0.00795
C16   1    0.860602    0.193209    0.090967    11.00000    0.03063    0.02315 =
         0.02452    0.00688    0.00473    0.00820
C17   1    0.902140    0.642060    0.014149    11.00000    0.03492    0.02218 =
         0.03161    0.00894    0.01054    0.01399
AFIX  43
H17   2    0.837714    0.735200    0.023251    11.00000   -1.20000
HKLF    4
 
REM  11s_sk3_pmdi12_0s in P-1
REM R1 =  0.0443 for   2410 Fo > 4sig(Fo)  and  0.0773 for all   3692 data
REM    181 parameters refined using      0 restraints
 
END
 
WGHT      0.0497      0.0000
REM Highest difference peak  0.221,  deepest hole -0.211,  1-sigma level  0.044
Q1    1   0.9096  0.2648  0.0564  11.00000  0.05    0.22
Q2    1   0.8225  0.4726  0.0984  11.00000  0.05    0.18
Q3    1   1.0585  0.3651  0.0389  11.00000  0.05    0.17
Q4    1   0.8468  0.3609  0.0213  11.00000  0.05    0.16
Q5    1   0.9610  0.4442  0.0842  11.00000  0.05    0.16
Q6    1   0.6600  0.1944  0.2481  11.00000  0.05    0.14
Q7    1   0.7667 -0.0427  0.3905  11.00000  0.05    0.14
Q8    1   0.2666 -0.3385  0.4318  11.00000  0.05    0.14
Q9    1   0.6644  0.2023  0.1748  11.00000  0.05    0.14
Q10   1   0.5050  0.1398  0.1824  11.00000  0.05    0.13
Q11   1   0.3897 -0.3490  0.5403  11.00000  0.05    0.13
Q12   1   1.0005  0.2206  0.4871  11.00000  0.05    0.13
Q13   1   0.9505  0.1586  0.4021  11.00000  0.05    0.13
Q14   1   0.7226  0.3324  0.1340  11.00000  0.05    0.13
Q15   1   0.8519  0.5327  0.0227  11.00000  0.05    0.12
Q16   1   0.4883 -0.0517  0.3554  11.00000  0.05    0.12
Q17   1   0.7530 -0.5189  0.4846  11.00000  0.05    0.12
Q18   1   0.6594  0.0395  0.5395  11.00000  0.05    0.12
Q19   1   0.8743  0.1382  0.5063  11.00000  0.05    0.12
Q20   1   0.7498  0.0648  0.4980  11.00000  0.05    0.12
;
