# Supplementary material
Source: publisher figshare collection journal article supplement (https://acs.figshare.com/ndownloader/files/4106071)
Supplement: Supplementary file 2 [file 4106071 › polyI-11s_sk3_pmdi12_0s.fcf]

#
# h,k,l, Fc-squared, Fo-squared, sigma(Fo-squared) and status flag
#
data_polyI_11s_sk3_pmdi12_0s
_shelx_title ' 11s_sk3_pmdi12_0s in P-1'
_shelx_refln_list_code          4
_shelx_F_calc_maximum      110.21
_exptl_crystal_F_000       298.00
_reflns_d_resolution_high  0.7570
 
loop_
 _symmetry_equiv_pos_as_xyz
 'x, y, z'
 '-x, -y, -z'
 
_cell_length_a     7.0557
_cell_length_b     7.6048
_cell_length_c    15.1267
_cell_angle_alpha  96.046
_cell_angle_beta   96.701
_cell_angle_gamma 106.338
 
_shelx_F_squared_multiplier     1.000
 
loop_
 _refln_index_h
 _refln_index_k
 _refln_index_l
 _refln_F_squared_calc
 _refln_F_squared_meas
 _refln_F_squared_sigma
 _refln_observed_status
   1   0   0       11.73       11.36      0.98 o
   2   0   0     1886.44     1793.18     26.93 o
   3   0   0      113.08      115.82      2.13 o
   4   0   0      225.86      233.58      3.39 o
   5   0   0      240.62      248.81      3.97 o
   6   0   0        9.64        9.05      1.43 o
   7   0   0       77.50       67.62      3.88 o
   8   0   0        7.89        7.69      3.46 o
  -9   1   0        0.26        0.60      5.07 o
  -8   1   0        4.60        3.03      2.79 o
  -7   1   0        0.07        0.33      1.40 o
  -6   1   0       36.03       40.70      2.20 o
  -5   1   0       34.98       34.89      1.59 o
  -4   1   0      393.11      393.52      4.18 o
  -3   1   0      220.34      207.61      6.48 o
  -2   1   0      570.08      566.46      7.67 o
  -1   1   0     2728.52     2449.15     21.91 o
   0   1   0       87.44       82.75      0.95 o
   1   1   0     4216.94     4138.35     80.87 o
   2   1   0       21.52       25.26      0.80 o
   3   1   0       20.49       19.51      1.06 o
   4   1   0       31.59       28.68      2.72 o
   5   1   0        3.09        3.91      1.01 o
   6   1   0      128.83      122.28      4.24 o
   7   1   0        9.92        7.66      3.33 o
   8   1   0       76.79       83.93     11.12 o
  -9   2   0        7.33        9.16      4.02 o
  -8   2   0       40.66       48.17      4.32 o
  -7   2   0       62.29       58.30      3.26 o
  -6   2   0        1.82        1.70      1.00 o
  -5   2   0      229.51      235.81      4.19 o
  -4   2   0       42.59       39.40      1.88 o
  -3   2   0     1557.67     1598.45     17.40 o
  -2   2   0       50.04       43.18      1.24 o
  -1   2   0      138.26      131.26      1.64 o
   0   2   0        0.64        1.71      0.49 o
   1   2   0        4.69        5.36      0.44 o
   2   2   0      295.63      280.77      8.16 o
   3   2   0        1.30        1.34      1.03 o
   4   2   0       33.59       33.16      2.35 o
   5   2   0       10.69       10.73      1.80 o
   6   2   0       46.12       33.30      9.89 o
   7   2   0       37.13       41.60      5.38 o
   8   2   0        0.06        1.37      5.81 o
  -9   3   0        1.38        1.21      2.58 o
  -8   3   0        1.70        2.29      1.92 o
  -7   3   0       24.80       22.13      2.18 o
  -6   3   0       38.38       40.91      2.64 o
  -5   3   0       90.42       83.62      3.16 o
  -4   3   0      534.45      561.30     10.57 o
  -3   3   0       61.35       59.16      1.86 o
  -2   3   0      274.87      275.26      3.10 o
  -1   3   0      582.61      600.64      8.19 o
   0   3   0      156.33      160.49      3.46 o
   1   3   0      105.15      102.03      1.94 o
   2   3   0       26.41       28.42      1.79 o
   3   3   0       12.53       15.45      1.60 o
   4   3   0       62.26       64.57      3.48 o
   5   3   0       23.66       25.71      3.94 o
   6   3   0        6.80       10.70      3.67 o
   7   3   0        7.89        3.61      3.91 o
  -9   4   0        0.05        2.19      2.70 o
  -8   4   0        9.24        4.41      2.18 o
  -7   4   0       78.64       75.14      3.48 o
  -6   4   0        3.40        3.30      1.40 o
  -5   4   0      149.73      130.56      4.01 o
  -4   4   0       90.48       93.49      2.36 o
  -3   4   0       50.96       47.23      1.94 o
  -2   4   0      520.11      552.60      6.20 o
  -1   4   0       53.07       53.37      1.82 o
   0   4   0      272.06      289.41      4.06 o
   1   4   0      126.70      128.46      2.92 o
   2   4   0      174.32      185.12      7.86 o
   3   4   0       10.26       10.20      2.75 o
   4   4   0        4.60        4.50      2.34 o
   5   4   0        0.07        0.28      2.59 o
   6   4   0       31.56       27.70      5.14 o
  -9   5   0       14.71       21.67      4.06 o
  -8   5   0        1.31        0.20      1.75 o
  -7   5   0       45.43       35.81      2.99 o
  -6   5   0      369.47      348.11      7.57 o
  -5   5   0      213.57      212.25      5.26 o
  -4   5   0       15.84       15.99      1.55 o
  -3   5   0        4.50        2.91      0.91 o
  -2   5   0      196.40      205.90      3.89 o
  -1   5   0        1.95        1.50      0.77 o
   0   5   0       56.56       60.00      2.17 o
   1   5   0      128.85      131.01      3.84 o
   2   5   0        0.21        0.37      1.09 o
   3   5   0       70.82       60.76      4.90 o
   4   5   0       45.25       48.37      7.78 o
   5   5   0       11.03        9.57      3.85 o
   6   5   0       24.69       21.58      5.38 o
  -8   6   0        3.35        6.09      2.75 o
  -7   6   0        0.61        1.15      1.61 o
  -6   6   0        1.01       -0.08      1.31 o
  -5   6   0       41.79       44.17      2.87 o
  -4   6   0      140.06      131.72      3.77 o
  -3   6   0      173.49      160.29      4.00 o
  -2   6   0       31.94       32.38      2.15 o
  -1   6   0        0.73       -0.84      0.84 o
   0   6   0       13.11       15.40      1.48 o
   1   6   0      146.22      163.90      5.34 o
   2   6   0      127.83      118.22      6.48 o
   3   6   0       42.50       37.36      7.12 o
   4   6   0       25.35       22.30      6.77 o
   5   6   0        7.68        7.40      6.97 o
  -8   7   0        0.75       -1.09      2.31 o
  -7   7   0       11.30       12.38      2.80 o
  -6   7   0        3.88        2.47      1.63 o
  -5   7   0      100.26       90.98      4.04 o
  -4   7   0       17.98       14.07      2.13 o
  -3   7   0       71.94       68.39      3.31 o
  -2   7   0      123.43      115.24      3.89 o
  -1   7   0       34.01       36.81      3.16 o
   0   7   0      203.80      219.15      5.71 o
   1   7   0       11.24        8.94      3.20 o
   2   7   0       22.22       18.41      6.03 o
   3   7   0       71.24       72.45     10.19 o
   4   7   0        0.58        3.92      5.56 o
  -7   8   0       25.69       31.33      3.89 o
  -6   8   0        0.04        1.13      1.93 o
  -5   8   0       16.14       13.61      2.46 o
  -4   8   0        0.00        0.38      1.72 o
  -3   8   0        6.86        5.58      1.96 o
  -2   8   0        8.49        8.33      2.08 o
  -1   8   0       27.07       24.86      2.93 o
   0   8   0       34.53       35.21      4.86 o
   1   8   0       28.03       29.12      6.90 o
   2   8   0        6.58        7.42      5.81 o
  -6   9   0        0.06        0.59      2.51 o
  -5   9   0        6.91        6.37      2.97 o
  -4   9   0        4.61        3.31      2.29 o
  -3   9   0       37.34       42.76      3.48 o
  -2   9   0        1.14        2.23      1.91 o
  -1   9   0        3.47        1.52      3.09 o
   0   9   0        0.15       -0.68      3.81 o
   1   9   0        1.64       -0.05      4.52 o
   2 -10   1        0.59        2.29      3.29 o
   3 -10   1        0.51        2.66      2.78 o
  -1  -9   1        0.72        0.14      4.90 o
   0  -9   1        5.78        3.73      4.63 o
   1  -9   1        6.74        7.90      3.67 o
   2  -9   1       12.48       14.99      3.01 o
   3  -9   1        0.17        0.04      1.77 o
   4  -9   1       15.03       19.57      2.80 o
   5  -9   1        0.92        0.64      2.15 o
   6  -9   1       11.34       16.35      3.28 o
  -3  -8   1        3.42        4.88      5.67 o
  -2  -8   1        3.03        5.20      5.12 o
  -1  -8   1        0.00        0.11      3.40 o
   0  -8   1        0.39        0.65      2.49 o
   1  -8   1        7.02       10.79      2.10 o
   2  -8   1       24.78       21.79      2.40 o
   3  -8   1        7.98        5.46      1.78 o
   4  -8   1        7.14       10.83      2.00 o
   5  -8   1        2.04        0.73      1.53 o
   6  -8   1        0.68        0.02      2.09 o
   7  -8   1       11.07       15.33      3.56 o
  -4  -7   1        0.81       -2.05      4.46 o
  -3  -7   1        6.94        7.23      4.99 o
  -2  -7   1       82.18       75.22      9.53 o
  -1  -7   1       11.03       13.70      3.31 o
   0  -7   1       52.34       52.97      3.15 o
   1  -7   1        5.21        7.01      1.28 o
   2  -7   1       89.57       86.49      3.49 o
   3  -7   1      192.51      163.71      4.94 o
   4  -7   1       25.04       22.36      2.67 o
   5  -7   1        0.21       -0.16      1.32 o
   6  -7   1       44.71       44.29      3.05 o
   7  -7   1        0.16        1.26      2.24 o
   8  -7   1        0.08        1.30      3.03 o
  -5  -6   1        4.35        3.45      3.82 o
  -4  -6   1        0.42        1.84      2.92 o
  -3  -6   1       59.26       63.22      8.71 o
  -2  -6   1       43.92       51.75      4.77 o
  -1  -6   1       97.01      107.29      3.67 o
   0  -6   1        7.62        8.07      1.08 o
   1  -6   1       52.92       45.62      2.39 o
   2  -6   1       85.30       79.25      2.88 o
   3  -6   1      121.26      142.23      4.15 o
   4  -6   1      495.85      479.30      7.72 o
   5  -6   1       28.80       28.61      2.47 o
   6  -6   1       28.04       32.71      2.57 o
   7  -6   1       36.24       34.60      2.82 o
   8  -6   1        0.08        2.08      2.38 o
  -6  -5   1        1.37        0.55      3.82 o
  -5  -5   1       14.29        8.11      3.66 o
  -4  -5   1       25.85       23.24      4.30 o
  -3  -5   1        5.75        7.14      2.67 o
  -2  -5   1       16.75       16.93      1.58 o
  -1  -5   1      179.92      189.84      3.56 o
   0  -5   1       10.80        8.16      1.11 o
   1  -5   1       39.49       44.83      1.79 o
   2  -5   1       18.77       19.44      1.61 o
   3  -5   1        1.56        2.21      0.90 o
   4  -5   1       11.55       12.63      1.45 o
   5  -5   1      187.67      177.95      4.86 o
   6  -5   1       45.79       38.30      2.58 o
   7  -5   1       27.86       28.63      2.54 o
   8  -5   1        2.01        2.95      2.17 o
  -7  -4   1        5.31        6.22      5.86 o
  -6  -4   1        8.92        7.15      3.77 o
  -5  -4   1       73.56       66.86      6.17 o
  -4  -4   1       23.99       20.67      3.67 o
  -3  -4   1        7.90        7.58      1.59 o
  -2  -4   1       78.12       75.49      3.09 o
  -1  -4   1      376.12      383.44      4.30 o
   0  -4   1      236.03      248.30      3.53 o
   1  -4   1       81.42       84.62      2.21 o
   2  -4   1       39.13       35.53      1.52 o
   3  -4   1       75.90       86.33      2.52 o
   4  -4   1       53.03       60.90      1.82 o
   5  -4   1       39.59       43.12      2.53 o
   6  -4   1        6.92        4.48      1.37 o
   7  -4   1        0.19        0.94      1.48 o
   8  -4   1       13.82       14.90      2.80 o
   9  -4   1        1.00        1.18      2.58 o
  -7  -3   1       47.94       43.68      5.94 o
  -6  -3   1       47.70       41.67      5.22 o
  -5  -3   1        2.46        0.51      2.35 o
  -4  -3   1       31.96       35.27      2.54 o
  -3  -3   1      127.82      137.23      3.77 o
  -2  -3   1      321.38      337.38      7.92 o
  -1  -3   1      738.61      777.97      8.21 o
   0  -3   1      510.76      508.55      6.06 o
   1  -3   1       32.24       28.41      1.19 o
   2  -3   1      356.41      363.35      4.90 o
   3  -3   1      119.88      116.24      7.63 o
   4  -3   1      105.07       93.50      2.99 o
   5  -3   1       18.11       20.17      1.84 o
   6  -3   1        8.96        9.39      1.55 o
   7  -3   1       24.23       27.60      2.58 o
   8  -3   1       29.93       35.87      3.47 o
   9  -3   1        8.18       13.68      3.39 o
  -8  -2   1        0.48       -2.85      5.26 o
  -7  -2   1       50.94       50.92      6.94 o
  -6  -2   1        8.93        6.38      2.15 o
  -5  -2   1       12.90       11.95      2.72 o
  -4  -2   1      266.66      262.16      4.78 o
  -3  -2   1       41.02       40.15      1.79 o
  -2  -2   1      408.41      409.87      8.24 o
  -1  -2   1       26.47       25.11      0.84 o
   0  -2   1     2530.33     2559.39     31.55 o
   1  -2   1      815.06      669.66     60.70 o
   2  -2   1       22.47       26.28      2.00 o
   3  -2   1       35.62       27.17      2.26 o
   4  -2   1     1041.77     1021.83     10.50 o
   5  -2   1       11.04       13.72      1.10 o
   6  -2   1       40.59       38.62      2.56 o
   7  -2   1        0.80       -0.05      1.34 o
   8  -2   1       29.55       37.25      3.99 o
   9  -2   1        1.11        2.37      3.32 o
  -8  -1   1       65.35       70.01     10.44 o
  -7  -1   1        3.59        3.48      2.30 o
  -6  -1   1        9.49        9.13      1.79 o
  -5  -1   1       18.13       14.61      1.36 o
  -4  -1   1        5.77        6.80      0.85 o
  -3  -1   1        0.25       -0.06      0.50 o
  -2  -1   1      235.70      228.58      3.82 o
  -1  -1   1       78.24       80.51      1.03 o
   0  -1   1      121.40      116.42      1.21 o
   1  -1   1      404.60      385.83      4.53 o
   2  -1   1     2435.02     2319.87     37.78 o
   3  -1   1       96.46      100.79      2.60 o
   4  -1   1      330.04      331.98      3.83 o
   5  -1   1       54.80       56.70      2.05 o
   6  -1   1        9.41        5.29      1.26 o
   7  -1   1        0.73        3.18      1.60 o
   8  -1   1        2.14        0.47      2.60 o
  -8   0   1        0.95        0.49      2.84 o
  -7   0   1       24.45       21.89      2.63 o
  -6   0   1        5.73        6.59      1.43 o
  -5   0   1        4.98        5.00      0.95 o
  -4   0   1      335.20      335.34      4.07 o
  -3   0   1      533.31      532.34     10.16 o
  -2   0   1        0.13       -0.11      0.41 o
  -1   0   1       59.18       52.89      1.10 o
   0   0   1      924.24      348.72    113.03 o
   1   0   1     3268.89     3140.72     49.00 o
   2   0   1      281.12      287.65      4.83 o
   3   0   1      431.11      422.58      4.38 o
   4   0   1      126.35      130.70      2.64 o
   5   0   1       66.62       70.00      2.23 o
   6   0   1      109.49      116.02      3.35 o
   7   0   1        0.08       -0.22      1.82 o
   8   0   1       11.35        8.93      5.64 o
  -9   1   1        3.65        5.06      3.71 o
  -8   1   1        8.87       11.08      5.79 o
  -7   1   1      119.54      121.14      4.24 o
  -6   1   1       11.45        8.00      1.38 o
  -5   1   1        5.60        4.06      1.04 o
  -4   1   1      154.61      152.80      4.68 o
  -3   1   1       63.08       58.20      2.07 o
  -2   1   1      247.79      259.47      3.29 o
  -1   1   1     1824.61     1677.37     15.57 o
   0   1   1     1476.20     1437.34      8.95 o
   1   1   1        3.15        3.14      0.63 o
   2   1   1      624.45      616.70      9.88 o
   3   1   1       52.54       53.19      2.24 o
   4   1   1      115.06      123.32      2.61 o
   5   1   1        2.92        2.70      0.99 o
   6   1   1        3.70        3.51      1.51 o
   7   1   1        2.79        2.93      4.71 o
   8   1   1        0.19        0.25      5.42 o
  -9   2   1       19.18       23.72      4.94 o
  -8   2   1        0.41        1.49      2.13 o
  -7   2   1       10.47       12.33      1.77 o
  -6   2   1        4.27        4.85      1.22 o
  -5   2   1        0.21       -0.78      0.83 o
  -4   2   1       16.55       19.88      1.24 o
  -3   2   1        5.47        3.41      0.70 o
  -2   2   1      144.33      147.00      2.29 o
  -1   2   1      115.55      100.42      1.42 o
   0   2   1      459.81      435.67      3.79 o
   1   2   1       88.51       99.85      2.95 o
   2   2   1       20.31       19.81      1.29 o
   3   2   1      207.29      193.56      5.82 o
   4   2   1        3.33        4.69      1.38 o
   5   2   1       53.25       48.68      2.77 o
   6   2   1        7.99        3.95      5.07 o
   7   2   1        0.05       -1.39      2.97 o
   8   2   1        3.65       -0.85      6.03 o
  -9   3   1       12.95       18.46      4.51 o
  -8   3   1        1.26        2.93      1.78 o
  -7   3   1       63.47       65.58      3.47 o
  -6   3   1        5.51        5.01      1.47 o
  -5   3   1      204.24      215.03      3.72 o
  -4   3   1       53.29       60.29      2.03 o
  -3   3   1        0.12        1.86      0.76 o
  -2   3   1      242.13      236.83      3.04 o
  -1   3   1     1679.48     1741.43     16.87 o
   0   3   1       40.28       38.68      1.49 o
   1   3   1       23.30       22.77      1.06 o
   2   3   1      250.25      237.42      7.49 o
   3   3   1        3.62        3.34      2.19 o
   4   3   1      103.06      112.68      5.72 o
   5   3   1        0.80        2.33      2.17 o
   6   3   1       14.16       13.86      4.00 o
   7   3   1        0.75        0.01      3.63 o
  -9   4   1        1.91        1.23      2.29 o
  -8   4   1        7.14        8.50      2.19 o
  -7   4   1      108.69      106.59      4.37 o
  -6   4   1        1.11        1.57      1.28 o
  -5   4   1       62.65       62.03      2.33 o
  -4   4   1       54.04       44.85      2.00 o
  -3   4   1      219.79      217.26      4.20 o
  -2   4   1      427.15      450.75      4.32 o
  -1   4   1      339.64      337.62      4.13 o
   0   4   1      175.58      193.95      3.37 o
   1   4   1       43.00       38.85      1.60 o
   2   4   1       24.82       26.48      1.55 o
   3   4   1        8.73        8.85      2.81 o
   4   4   1        4.41        1.93      3.00 o
   5   4   1        6.65        2.60      4.52 o
   6   4   1        9.15       11.37      4.13 o
  -9   5   1        0.52       -0.81      2.60 o
  -8   5   1        0.86        0.53      1.96 o
  -7   5   1       14.64       16.50      2.36 o
  -6   5   1      146.15      139.48      4.69 o
  -5   5   1       34.47       30.93      2.72 o
  -4   5   1       90.22       88.16      2.94 o
  -3   5   1       73.02       70.26      2.28 o
  -2   5   1       94.66       88.55      2.85 o
  -1   5   1      351.61      392.44     10.05 o
   0   5   1      112.15      114.22      3.49 o
   1   5   1      270.69      284.81      5.70 o
   2   5   1       16.42       19.79      1.98 o
   3   5   1        4.67        3.62      2.63 o
   4   5   1       28.79       30.02      6.88 o
   5   5   1        6.00        7.34      5.42 o
   6   5   1       72.89       80.70     11.64 o
  -8   6   1        1.25       -0.12      2.25 o
  -7   6   1        0.18        0.22      1.58 o
  -6   6   1       26.27       25.13      2.54 o
  -5   6   1       99.35      106.87      4.05 o
  -4   6   1       13.74       18.64      1.65 o
  -3   6   1      199.39      190.82      4.65 o
  -2   6   1        7.07        6.40      1.31 o
  -1   6   1       25.85       23.94      1.80 o
   0   6   1       38.05       36.14      1.97 o
   1   6   1        0.75       -1.34      1.34 o
   2   6   1       21.61       16.95      3.57 o
   3   6   1       18.37       11.64      5.15 o
   4   6   1        8.09        4.44      5.15 o
   5   6   1        7.83       -1.15      5.51 o
  -8   7   1        7.77        7.95      3.19 o
  -7   7   1        9.00       11.82      3.13 o
  -6   7   1        0.11        1.03      1.41 o
  -5   7   1        1.40        1.50      1.29 o
  -4   7   1      215.55      234.01      9.29 o
  -3   7   1       88.79       85.01      7.25 o
  -2   7   1      219.67      219.98      6.06 o
  -1   7   1      270.94      263.14      6.28 o
   0   7   1       26.78       25.14      3.01 o
   1   7   1       51.32       54.65      5.44 o
   2   7   1        7.51       -0.71      3.56 o
   3   7   1       50.88       49.42      9.09 o
   4   7   1       10.27        8.57      6.25 o
  -7   8   1       47.26       61.51      4.91 o
  -6   8   1        2.39        2.69      2.44 o
  -5   8   1        3.32        2.21      2.04 o
  -4   8   1        1.87        2.06      1.83 o
  -3   8   1        6.62        3.61      1.86 o
  -2   8   1       47.03       43.04      3.40 o
  -1   8   1       10.69        9.87      2.37 o
   0   8   1        0.00       -0.46      2.42 o
   1   8   1       12.37        5.82      4.11 o
   2   8   1       45.54       50.21      8.98 o
  -6   9   1        0.27        1.39      2.52 o
  -5   9   1        2.02        6.13      2.90 o
  -4   9   1        8.79        8.21      2.90 o
  -3   9   1        6.05        9.00      2.59 o
  -2   9   1        2.22       -0.62      2.48 o
  -1   9   1        0.46        0.52      2.79 o
   0   9   1        0.39       -2.87      4.37 o
   2 -10   2       71.83       91.23      6.41 o
   3 -10   2        1.09        2.72      2.32 o
  -1  -9   2        0.93        5.97      5.29 o
   0  -9   2        3.44        7.29      3.71 o
   1  -9   2       15.86       17.47      4.16 o
   2  -9   2        0.06        1.73      1.70 o
   3  -9   2       44.91       59.69      4.24 o
   4  -9   2       39.62       45.99      4.02 o
   5  -9   2       10.03       11.34      2.83 o
   6  -9   2        6.61        9.30      3.20 o
  -3  -8   2        2.73        0.16      4.63 o
  -2  -8   2        8.58        8.85      3.98 o
  -1  -8   2        1.50        4.27      4.71 o
   0  -8   2        3.20        0.14      2.34 o
   1  -8   2        2.25        2.34      1.38 o
   2  -8   2       15.30       16.54      2.41 o
   3  -8   2        2.39        2.89      1.59 o
   4  -8   2       28.59       37.19      2.83 o
   5  -8   2        0.05       -0.92      1.52 o
   6  -8   2       17.72       15.83      5.57 o
   7  -8   2       12.55       22.42      5.21 o
  -4  -7   2        0.68       -0.71      4.68 o
  -3  -7   2       18.18       14.77      4.20 o
  -2  -7   2        6.22        8.77      4.99 o
  -1  -7   2       38.79       41.28      5.19 o
   0  -7   2        1.43        0.89      1.32 o
   1  -7   2       15.30       15.63      1.90 o
   2  -7   2      245.93      245.41      5.22 o
   3  -7   2      115.80      110.38      4.16 o
   4  -7   2       13.16       12.89      2.07 o
   5  -7   2       14.89       12.65      2.81 o
   6  -7   2        7.07        5.49      1.70 o
   7  -7   2        0.16        1.11      2.28 o
   8  -7   2        5.48       11.83      4.38 o
  -5  -6   2        5.78        7.55      4.02 o
  -4  -6   2        0.98        1.09      3.74 o
  -3  -6   2        9.19       10.45      3.26 o
  -2  -6   2       32.99       28.48      3.68 o
  -1  -6   2       11.25       12.07      1.72 o
   0  -6   2      116.56      114.48      3.17 o
   1  -6   2      372.99      365.25      5.47 o
   2  -6   2       12.86       14.37      1.54 o
   3  -6   2        3.27        3.54      1.20 o
   4  -6   2        9.43        6.63      1.28 o
   5  -6   2      101.07       86.08      5.19 o
   6  -6   2        2.05        3.27      1.44 o
   7  -6   2        3.68        3.31      2.00 o
   8  -6   2        0.07        1.77      2.98 o
  -6  -5   2        4.54        2.98      4.01 o
  -5  -5   2       39.47       36.52      5.37 o
  -4  -5   2       88.60       91.18      6.83 o
  -3  -5   2      102.52      101.67      6.65 o
  -2  -5   2       26.48       27.95      1.62 o
  -1  -5   2       16.52       18.63      1.50 o
   0  -5   2        3.76        2.90      0.92 o
   1  -5   2       12.26       14.69      1.21 o
   2  -5   2      168.71      173.34      3.97 o
   3  -5   2      194.00      153.47     24.19 o
   4  -5   2       26.89       26.88      1.56 o
   5  -5   2       10.72        8.27      1.48 o
   6  -5   2       50.25       54.35      2.94 o
   7  -5   2       28.32       26.62      2.73 o
   8  -5   2       19.30       26.31      3.40 o
  -7  -4   2        1.46        0.98      4.13 o
  -6  -4   2        6.87        1.72      3.19 o
  -5  -4   2       20.20       17.57      3.96 o
  -4  -4   2        2.92        2.06      1.58 o
  -3  -4   2        1.15        1.09      1.26 o
  -2  -4   2        2.94        1.97      0.89 o
  -1  -4   2        2.78        4.14      0.85 o
   0  -4   2      164.61      164.82      2.90 o
   1  -4   2        0.24        0.06      0.59 o
   2  -4   2        1.83        2.14      0.59 o
   3  -4   2       34.75       45.84      1.96 o
   4  -4   2      263.80      265.06      4.37 o
   5  -4   2       61.77       63.07      2.74 o
   6  -4   2       22.90       27.20      2.38 o
   7  -4   2      110.77       92.65     21.42 o
   8  -4   2       18.57       15.83      4.74 o
   9  -4   2        4.88        4.23      3.83 o
  -7  -3   2        1.01       -1.75      3.30 o
  -6  -3   2       30.11       22.19      6.16 o
  -5  -3   2      100.71      101.86      4.76 o
  -4  -3   2      101.86      101.38      3.28 o
  -3  -3   2      126.17      135.29      4.01 o
  -2  -3   2        0.29        1.52      0.81 o
  -1  -3   2      206.20      214.60      2.58 o
   0  -3   2     1601.49     1622.06     20.03 o
   1  -3   2      297.92      295.14      3.38 o
   2  -3   2     1141.51     1205.65      9.85 o
   3  -3   2        3.48        4.83      0.72 o
   4  -3   2        0.01        1.18      0.79 o
   5  -3   2       21.75       20.09      1.86 o
   6  -3   2       42.00       28.47      7.72 o
   7  -3   2       28.99       39.64      2.92 o
   8  -3   2       29.80       29.72      3.30 o
   9  -3   2        5.86        7.97      3.14 o
  -8  -2   2        0.94        2.05      5.97 o
  -7  -2   2        8.00        2.20      2.78 o
  -6  -2   2        0.98        1.60      1.86 o
  -5  -2   2        0.16        0.29      1.11 o
  -4  -2   2      261.37      270.03      6.21 o
  -3  -2   2      150.47      147.33      4.21 o
  -2  -2   2      143.37      140.75      4.95 o
  -1  -2   2       22.24       18.70      0.80 o
   0  -2   2        0.41        0.35      0.45 o
   1  -2   2       76.28       76.05      1.23 o
   2  -2   2      618.12      590.48      6.32 o
   3  -2   2      355.70      352.78      4.18 o
   4  -2   2       26.84       28.61      1.64 o
   5  -2   2        3.05        3.84      1.16 o
   6  -2   2        2.24        0.91      1.24 o
   7  -2   2        3.54        2.74      1.51 o
   8  -2   2        2.72        6.21      2.57 o
   9  -2   2        0.00        2.26      3.15 o
  -8  -1   2       15.37       22.35      7.34 o
  -7  -1   2        1.81        0.99      2.13 o
  -6  -1   2       22.23       20.65      2.75 o
  -5  -1   2        0.99        1.12      0.81 o
  -4  -1   2        5.87        5.39      0.79 o
  -3  -1   2       21.44       27.70      1.03 o
  -2  -1   2      196.75      189.20      3.07 o
  -1  -1   2      260.25      255.71      3.88 o
   0  -1   2      770.50      755.01      4.62 o
   1  -1   2      431.94      431.46      2.93 o
   2  -1   2       78.59       82.91      1.58 o
   3  -1   2        1.48        1.25      0.64 o
   4  -1   2      178.29      174.54      6.19 o
   5  -1   2        1.47        0.84      0.86 o
   6  -1   2        0.80        0.89      1.05 o
   7  -1   2        3.85        4.14      1.64 o
   8  -1   2       41.28       53.84      4.58 o
  -8   0   2        5.40        5.92      3.21 o
  -7   0   2        0.28       -0.45      1.89 o
  -6   0   2       15.43       15.21      1.71 o
  -5   0   2       65.93       71.97      2.34 o
  -4   0   2      124.47      138.27      2.69 o
  -3   0   2      395.22      378.74     11.53 o
  -2   0   2      335.12      328.78      3.16 o
  -1   0   2      280.79      256.29      7.90 o
   0   0   2      396.52      346.20      3.50 o
   1   0   2     2465.63     2464.94     16.56 o
   2   0   2      564.89      562.14      4.61 o
   3   0   2        0.94        0.80      0.64 o
   4   0   2        2.00        1.02      0.80 o
   5   0   2       10.04        8.11      1.17 o
   6   0   2        6.33        9.17      1.44 o
   7   0   2        9.45        8.35      2.46 o
   8   0   2        2.62        4.36      5.09 o
  -9   1   2       12.79       15.96      4.39 o
  -8   1   2        3.29        3.03      2.81 o
  -7   1   2       11.46       11.10      1.71 o
  -6   1   2       21.82       21.85      1.91 o
  -5   1   2        5.37        7.54      1.17 o
  -4   1   2       33.13       31.45      2.36 o
  -3   1   2      338.00      322.28      3.35 o
  -2   1   2      516.81      485.06      5.26 o
  -1   1   2     8999.99     8259.09    108.82 o
   0   1   2     4313.52     4113.00     22.01 o
   1   1   2     3853.86     3635.58     68.74 o
   2   1   2      705.75      739.35     14.33 o
   3   1   2        1.66        1.53      0.69 o
   4   1   2        0.05       -0.10      0.78 o
   5   1   2       27.27       32.71      1.85 o
   6   1   2       33.66       26.65      2.27 o
   7   1   2        4.10        2.71      4.68 o
   8   1   2       32.27       36.05      8.57 o
  -9   2   2       17.10       25.14      5.06 o
  -8   2   2        9.14        7.38      2.60 o
  -7   2   2       65.47       63.77      3.35 o
  -6   2   2       20.73       18.16      1.66 o
  -5   2   2       67.47       60.35      2.03 o
  -4   2   2      436.55      450.64     10.84 o
  -3   2   2      587.81      597.39      9.16 o
  -2   2   2      234.64      227.73      2.67 o
  -1   2   2       44.81       42.80      0.97 o
   0   2   2      151.79      165.04      1.97 o
   1   2   2        1.56        2.20      0.72 o
   2   2   2        0.21        1.47      0.75 o
   3   2   2      139.05      135.70      2.69 o
   4   2   2       53.43       58.18      2.03 o
   5   2   2      210.61      197.16      8.35 o
   6   2   2        7.50        8.23      2.50 o
   7   2   2        7.41       11.18      6.33 o
  -9   3   2       15.88       25.46      5.07 o
  -8   3   2       24.51       25.16      3.14 o
  -7   3   2       59.64       57.05      3.30 o
  -6   3   2        6.33        6.94      1.59 o
  -5   3   2        1.34        0.15      0.86 o
  -4   3   2      496.75      506.27      8.60 o
  -3   3   2      111.29      132.36      2.91 o
  -2   3   2       82.91       80.64      2.04 o
  -1   3   2        0.16        0.14      0.47 o
   0   3   2      121.33      114.22      2.81 o
   1   3   2        2.84        4.81      0.99 o
   2   3   2       11.77       14.25      1.22 o
   3   3   2       64.96       58.81      5.18 o
   4   3   2      130.46      130.40     16.26 o
   5   3   2        1.65        5.62      2.61 o
   6   3   2       28.67       31.53      4.78 o
   7   3   2        0.09        1.06      3.56 o
  -9   4   2        0.06        1.87      2.20 o
  -8   4   2        9.36       17.48      2.90 o
  -7   4   2       30.28       30.23      2.75 o
  -6   4   2        5.07        4.44      1.49 o
  -5   4   2      125.61      128.81      3.34 o
  -4   4   2        0.66        0.20      0.79 o
  -3   4   2      627.02      629.22      6.52 o
  -2   4   2        1.19        1.72      0.64 o
  -1   4   2        2.01        3.88      0.75 o
   0   4   2      105.85      102.18      2.68 o
   1   4   2       95.45       96.12      4.12 o
   2   4   2       31.90       32.40      1.86 o
   3   4   2        0.22        2.66      2.62 o
   4   4   2       11.23       10.07      3.04 o
   5   4   2       54.56       53.50      8.55 o
   6   4   2       19.22       16.99      6.05 o
  -9   5   2        0.14        2.01      2.85 o
  -8   5   2       28.25       32.05      3.65 o
  -7   5   2        0.02        0.03      1.41 o
  -6   5   2        1.34       -0.12      1.26 o
  -5   5   2      150.59      144.12      4.42 o
  -4   5   2       41.50       38.74      2.17 o
  -3   5   2        3.11        2.74      0.88 o
  -2   5   2        6.45        4.08      1.00 o
  -1   5   2       20.56       18.84      1.44 o
   0   5   2       44.19       43.16      2.06 o
   1   5   2      209.06      198.58      4.62 o
   2   5   2      143.53      129.11      6.17 o
   3   5   2       44.94       44.95      4.68 o
   4   5   2       22.14       21.12      6.33 o
   5   5   2        0.25        1.21      4.55 o
   6   5   2        2.33        3.76      4.81 o
  -8   6   2        2.14        5.68      2.73 o
  -7   6   2       11.84       12.04      2.29 o
  -6   6   2      114.61      102.21      3.93 o
  -5   6   2        8.72       10.74      1.70 o
  -4   6   2       20.80       20.96      2.01 o
  -3   6   2       45.06       40.88      2.43 o
  -2   6   2       12.71       15.63      1.62 o
  -1   6   2       38.73       42.76      2.25 o
   0   6   2        0.69       -0.38      0.86 o
   1   6   2        7.53        9.03      2.02 o
   2   6   2       49.98       55.48      5.30 o
   3   6   2      102.11      103.49     10.68 o
   4   6   2        0.21       -0.38      4.19 o
   5   6   2        7.28        4.00      6.11 o
  -8   7   2        0.18        1.01      2.30 o
  -7   7   2       14.00       21.62      3.30 o
  -6   7   2        4.76        2.29      1.69 o
  -5   7   2       34.14       31.19      3.21 o
  -4   7   2        9.41        6.23      1.99 o
  -3   7   2       62.71       62.57      3.79 o
  -2   7   2        0.02        1.38      1.44 o
  -1   7   2      185.81      186.27      5.37 o
   0   7   2       22.81       24.17      3.01 o
   1   7   2       25.93       25.29      4.41 o
   2   7   2       40.13       36.84      5.12 o
   3   7   2        0.34       -2.49      4.19 o
  -7   8   2        0.95        4.45      2.80 o
  -6   8   2        3.27        3.56      2.52 o
  -5   8   2        2.43        1.15      1.85 o
  -4   8   2        1.01       -0.05      1.71 o
  -3   8   2        1.54        3.03      1.90 o
  -2   8   2       39.70       34.72      3.16 o
  -1   8   2       15.21       16.03      2.70 o
   0   8   2       12.22       13.69      4.02 o
   1   8   2        1.32       -2.23      2.78 o
   2   8   2        2.15       -2.25      4.03 o
  -6   9   2        2.59        4.65      2.83 o
  -5   9   2        0.58       -0.71      2.36 o
  -4   9   2        0.38       -0.28      2.18 o
  -3   9   2       28.95       34.76      3.68 o
  -2   9   2        1.73        2.87      2.76 o
  -1   9   2       32.03       27.49      5.05 o
   0   9   2        4.21        4.28      3.79 o
   2 -10   3       10.37       10.89      3.50 o
   3 -10   3        2.47        5.08      2.88 o
  -1  -9   3       17.85       22.22      7.26 o
   0  -9   3        3.28        4.44      3.40 o
   1  -9   3        6.08        8.59      2.88 o
   2  -9   3        4.24        4.27      1.86 o
   3  -9   3        8.71       12.42      2.31 o
   4  -9   3        0.60       -1.06      1.86 o
   5  -9   3        1.93        4.28      2.35 o
   6  -9   3        2.30        2.99      3.10 o
  -3  -8   3        2.55       -0.16      5.48 o
  -2  -8   3        7.57       12.31      4.17 o
  -1  -8   3        5.80        4.72      3.13 o
   0  -8   3        0.92        1.77      2.12 o
   1  -8   3       56.53       61.89      3.05 o
   2  -8   3       31.14       30.62      2.41 o
   3  -8   3       12.35       12.48      1.92 o
   4  -8   3        2.17        2.57      1.65 o
   5  -8   3       84.47       96.88      5.10 o
   6  -8   3       30.91       25.79      4.85 o
   7  -8   3        3.15        3.09      3.25 o
  -4  -7   3        3.41       -1.67      4.85 o
  -3  -7   3        0.02       -0.86      2.64 o
  -2  -7   3       57.37       63.67      6.13 o
  -1  -7   3       76.63       73.06      3.79 o
   0  -7   3        0.65        1.95      1.37 o
   1  -7   3       58.91       51.94      3.20 o
   2  -7   3        9.18       10.49      1.98 o
   3  -7   3       85.25       82.09      4.42 o
   4  -7   3       99.45       92.82      4.45 o
   5  -7   3        1.55        2.06      1.44 o
   6  -7   3       13.87       14.55      2.36 o
   7  -7   3        9.10       10.12      3.81 o
   8  -7   3        0.04        0.88      3.66 o
  -5  -6   3        1.77        3.11      4.85 o
  -4  -6   3        0.94        0.01      2.83 o
  -3  -6   3       29.48       19.60      4.05 o
  -2  -6   3      198.93      202.50     10.56 o
  -1  -6   3      140.30      134.66      3.76 o
   0  -6   3      392.70      385.90      6.74 o
   1  -6   3       93.26       90.72      2.75 o
   2  -6   3       35.78       37.03      2.35 o
   3  -6   3       87.42       76.83      3.12 o
   4  -6   3      131.48      127.56      3.48 o
   5  -6   3      107.67       99.91      4.03 o
   6  -6   3        3.27        3.91      1.58 o
   7  -6   3        1.88        2.94      2.04 o
   8  -6   3        0.40        2.20      3.21 o
  -6  -5   3        0.07       -0.80      3.54 o
  -5  -5   3       24.24       24.08      4.72 o
  -4  -5   3       84.01       65.03      6.03 o
  -3  -5   3       40.74       41.54      3.43 o
  -2  -5   3        4.75        3.31      1.01 o
  -1  -5   3      228.68      242.44      3.89 o
   0  -5   3      460.07      467.10      5.39 o
   1  -5   3       26.22       30.75      1.88 o
   2  -5   3      121.92      115.48      2.97 o
   3  -5   3      290.30      296.63      4.33 o
   4  -5   3       14.89       14.63      1.33 o
   5  -5   3        7.69        7.52      1.53 o
   6  -5   3      148.20      153.26      4.92 o
   7  -5   3       27.05       23.25      2.96 o
   8  -5   3       80.72       93.72      6.33 o
  -7  -4   3        1.19       -2.60      3.95 o
  -6  -4   3       27.45       32.38      5.35 o
  -5  -4   3      108.48      103.82      7.24 o
  -4  -4   3       14.43       13.66      2.35 o
  -3  -4   3       31.83       32.85      2.88 o
  -2  -4   3        3.36        3.36      0.75 o
  -1  -4   3       42.93       53.65      1.81 o
   0  -4   3      311.34      335.97      3.90 o
   1  -4   3      637.28      683.27      6.63 o
   2  -4   3      231.44      232.34      3.03 o
   3  -4   3        8.89        7.70      0.92 o
   4  -4   3      101.76      104.24      3.35 o
   5  -4   3        2.43        0.53      1.06 o
   6  -4   3       43.34       36.66      2.65 o
   7  -4   3       65.48       71.90      3.77 o
   8  -4   3        1.47        1.43      2.05 o
  -7  -3   3        2.89        3.65      3.64 o
  -6  -3   3        9.40        3.60      3.29 o
  -5  -3   3        3.48        1.33      1.71 o
  -4  -3   3      108.88      110.09      7.69 o
  -3  -3   3        4.03        3.90      1.55 o
  -2  -3   3       34.44       30.02      1.12 o
  -1  -3   3       58.19       56.28      1.45 o
   0  -3   3     1365.78     1382.51     16.58 o
   1  -3   3       68.16       77.99      1.65 o
   2  -3   3      116.86      117.48      1.91 o
   3  -3   3      183.13      184.04      3.55 o
   4  -3   3        0.12        0.06      0.79 o
   5  -3   3       53.72       60.29      3.16 o
   6  -3   3        1.29        1.59      1.21 o
   7  -3   3       15.58       15.18      2.16 o
   8  -3   3       31.21       40.58      3.66 o
  -8  -2   3        2.21        0.68      5.83 o
  -7  -2   3        3.79        1.07      3.27 o
  -6  -2   3       11.28       15.26      2.71 o
  -5  -2   3       99.24      108.79      6.87 o
  -4  -2   3        6.80        4.91      1.75 o
  -3  -2   3       71.78       77.04      1.76 o
  -2  -2   3       52.36       61.11      1.72 o
  -1  -2   3      244.21      284.19      2.60 o
   0  -2   3      123.54      127.36      2.63 o
   1  -2   3      523.87      544.59      3.30 o
   2  -2   3        1.35        0.42      0.34 o
   3  -2   3      409.31      429.26      5.99 o
   4  -2   3        1.47        1.06      0.82 o
   5  -2   3       15.10       13.34      1.71 o
   6  -2   3       28.61       30.38      2.37 o
   7  -2   3        7.66        9.26      2.06 o
   8  -2   3       27.16       26.53      4.55 o
  -8  -1   3        7.06       13.78      6.41 o
  -7  -1   3      111.05      123.06      5.98 o
  -6  -1   3       77.31       56.93     17.90 o
  -5  -1   3       26.18       25.44      1.54 o
  -4  -1   3       19.12       16.11      1.00 o
  -3  -1   3        6.28        9.03      0.71 o
  -2  -1   3      267.10      267.95      2.89 o
  -1  -1   3      460.66      442.08      5.65 o
   0  -1   3      142.41      134.66      7.51 o
   1  -1   3      758.96      734.53      6.19 o
   2  -1   3        8.76        8.58      0.72 o
   3  -1   3      387.02      410.13      4.12 o
   4  -1   3       15.09       16.49      2.02 o
   5  -1   3       52.29       45.76      6.35 o
   6  -1   3       43.35       52.65      2.45 o
   7  -1   3        0.02       -0.21      1.85 o
   8  -1   3        2.77        6.09      2.66 o
  -8   0   3       53.01       57.80      6.12 o
  -7   0   3        0.24        0.81      1.99 o
  -6   0   3      214.59      202.51      4.48 o
  -5   0   3       95.62       99.51      2.99 o
  -4   0   3       14.90       14.96      1.06 o
  -3   0   3     1053.32     1092.20     13.47 o
  -2   0   3      120.60      127.79      2.03 o
  -1   0   3      370.64      350.37      4.12 o
   0   0   3       15.11       17.82      0.75 o
   1   0   3    12146.96    11160.71    193.43 o
   2   0   3     1748.16     1802.13     17.02 o
   3   0   3      386.93      392.89      4.87 o
   4   0   3       37.62       35.26      1.77 o
   5   0   3       41.90       35.28      2.03 o
   6   0   3        1.44        1.37      1.19 o
   7   0   3        3.76        3.68      2.29 o
   8   0   3        2.83       -2.11      4.38 o
  -9   1   3        0.06        1.34      3.24 o
  -8   1   3        0.31        0.02      2.64 o
  -7   1   3        0.63       -0.19      1.34 o
  -6   1   3       43.74       43.63      2.52 o
  -5   1   3       47.22       55.83      2.08 o
  -4   1   3      110.71      106.36      2.55 o
  -3   1   3       30.78       31.77      1.35 o
  -2   1   3        4.28        3.38      0.57 o
  -1   1   3     1451.40     1463.64      8.23 o
   0   1   3      995.68      991.30      9.48 o
   1   1   3      163.03      161.72      2.31 o
   2   1   3       23.06       22.94      0.97 o
   3   1   3       55.74       55.54      1.80 o
   4   1   3       16.42       19.99      1.39 o
   5   1   3       15.57       13.75      1.69 o
   6   1   3        3.05        2.55      1.70 o
   7   1   3        2.67       -0.66      4.36 o
   8   1   3        3.11        1.51      5.62 o
  -9   2   3        3.13        3.96      4.88 o
  -8   2   3       11.25        9.78      2.71 o
  -7   2   3       64.77       62.72      3.60 o
  -6   2   3      214.78      219.66      4.50 o
  -5   2   3       77.50       80.67      2.39 o
  -4   2   3       31.58       35.70      1.79 o
  -3   2   3       11.48       11.43      1.01 o
  -2   2   3      429.87      433.07      3.95 o
  -1   2   3      127.77      126.61      2.33 o
   0   2   3       98.47       98.37      1.93 o
   1   2   3      191.02      192.95      3.11 o
   2   2   3       15.82       16.69      1.39 o
   3   2   3       27.48       22.99      1.65 o
   4   2   3       18.92       19.84      1.34 o
   5   2   3       16.56       23.43      2.98 o
   6   2   3        0.95        1.56      2.18 o
   7   2   3       11.08        6.52      5.94 o
  -9   3   3       16.42       20.96      4.90 o
  -8   3   3        1.41        0.32      1.82 o
  -7   3   3        0.58       -0.85      1.29 o
  -6   3   3       50.94       49.01      2.88 o
  -5   3   3        6.08        5.33      1.17 o
  -4   3   3       10.30        8.43      1.15 o
  -3   3   3       51.08       58.12      1.91 o
  -2   3   3      118.26      125.27      2.48 o
  -1   3   3      406.09      412.50      5.97 o
   0   3   3      156.36      166.94      2.92 o
   1   3   3       83.98       81.66      2.73 o
   2   3   3       44.22       44.16      2.13 o
   3   3   3        0.02       -0.63      1.04 o
   4   3   3        0.65        0.93      2.45 o
   5   3   3       65.46       62.27      8.90 o
   6   3   3       10.89       10.41      6.11 o
   7   3   3        0.05        2.44      6.30 o
  -9   4   3        6.59        7.95      2.86 o
  -8   4   3       23.72       26.27      3.31 o
  -7   4   3       72.22       76.55      3.86 o
  -6   4   3      128.48      113.59      4.15 o
  -5   4   3       32.31       36.69      2.14 o
  -4   4   3       41.97       33.32      1.76 o
  -3   4   3       16.47       21.53      1.60 o
  -2   4   3       50.25       45.45      1.86 o
  -1   4   3      174.42      193.35      2.99 o
   0   4   3      148.22      158.24      3.18 o
   1   4   3       61.39       68.01      2.79 o
   2   4   3      240.51      231.89      4.32 o
   3   4   3       39.59       30.83      4.04 o
   4   4   3        4.38        6.34      2.95 o
   5   4   3        6.09        7.04      5.29 o
   6   4   3        7.76        3.56      6.00 o
  -9   5   3        0.13       -0.97      2.25 o
  -8   5   3        5.01        5.44      2.14 o
  -7   5   3        3.84        3.23      1.50 o
  -6   5   3        2.73        2.02      1.23 o
  -5   5   3      440.04      390.24     10.02 o
  -4   5   3       12.88       11.09      1.54 o
  -3   5   3       24.47       23.71      1.75 o
  -2   5   3       52.18       47.97      2.11 o
  -1   5   3       18.83       17.59      1.40 o
   0   5   3        0.49       -0.10      0.79 o
   1   5   3        0.00       -1.18      1.19 o
   2   5   3        9.16        9.30      1.83 o
   3   5   3        1.07       -0.87      2.49 o
   4   5   3       26.58       24.41      6.68 o
   5   5   3        3.62        4.41      5.23 o
  -8   6   3        6.82        7.96      2.66 o
  -7   6   3        0.00        0.85      1.51 o
  -6   6   3        0.00        0.04      1.28 o
  -5   6   3       72.86       68.17      3.37 o
  -4   6   3      144.25      140.86      4.22 o
  -3   6   3        1.93        0.92      1.09 o
  -2   6   3       67.84       78.20      2.87 o
  -1   6   3       10.40       11.64      1.40 o
   0   6   3       37.45       43.84      2.37 o
   1   6   3        2.56        1.86      1.79 o
   2   6   3        2.09        1.02      2.87 o
   3   6   3       22.78       24.38      4.55 o
   4   6   3        0.38        2.30      5.01 o
  -8   7   3       11.10       15.34      3.86 o
  -7   7   3        0.30        0.93      2.36 o
  -6   7   3       14.74       15.83      2.86 o
  -5   7   3       20.12       15.72      2.67 o
  -4   7   3        0.70        1.02      1.55 o
  -3   7   3      137.55      141.92      5.32 o
  -2   7   3        2.76        1.82      1.58 o
  -1   7   3       21.14       22.80      2.40 o
   0   7   3       72.08       70.65      4.00 o
   1   7   3       36.12       37.83      9.09 o
   2   7   3       43.13       39.68      5.40 o
   3   7   3        2.86       -1.62      4.63 o
  -7   8   3        2.34        1.96      2.73 o
  -6   8   3        9.28       13.01      3.28 o
  -5   8   3        0.50       -0.42      1.79 o
  -4   8   3       12.98       11.32      2.55 o
  -3   8   3       12.02       17.62      2.76 o
  -2   8   3        1.27        3.71      2.42 o
  -1   8   3       73.79       73.12      4.41 o
   0   8   3        0.13       -0.51      2.84 o
   1   8   3        0.40       -1.74      4.66 o
   2   8   3        4.19        2.74      4.77 o
  -5   9   3        1.26        0.83      2.46 o
  -4   9   3        1.32        0.05      2.24 o
  -3   9   3       16.57       13.80      3.58 o
  -2   9   3        1.89        0.45      2.78 o
  -1   9   3        7.88        9.66      3.42 o
   0   9   3        6.83        9.74      4.43 o
  -1  -9   4        2.01        3.20      5.23 o
   0  -9   4        8.11       11.23      4.04 o
   1  -9   4        0.46        1.82      2.30 o
   2  -9   4        0.35        2.61      1.56 o
   3  -9   4        9.58       13.46      2.17 o
   4  -9   4        2.40        3.06      2.17 o
   5  -9   4        0.74       -0.06      2.65 o
   6  -9   4        1.08        2.78      3.30 o
  -3  -8   4        1.36       -2.90      5.15 o
  -2  -8   4        1.90        0.04      3.08 o
  -1  -8   4       28.30       36.06      5.22 o
   0  -8   4        0.42        1.80      1.69 o
   1  -8   4       11.34        6.94      1.76 o
   2  -8   4       14.25       21.80      2.15 o
   3  -8   4       12.13        8.94      1.90 o
   4  -8   4        1.79        2.04      1.86 o
   5  -8   4        6.18        7.59      2.36 o
   6  -8   4       10.71       13.47      4.05 o
   7  -8   4        7.04       11.69      4.19 o
  -4  -7   4        4.17        7.23      5.64 o
  -3  -7   4        5.34        7.13      3.88 o
  -2  -7   4       19.61       15.61      3.92 o
  -1  -7   4       16.54       15.71      2.73 o
   0  -7   4       33.93       37.61      2.54 o
   1  -7   4       42.49       42.57      3.33 o
   2  -7   4       52.54       46.94      2.79 o
   3  -7   4       67.55       75.30      3.42 o
   4  -7   4      108.81       90.33      4.43 o
   5  -7   4        1.15       -0.19      1.39 o
   6  -7   4       15.30       24.25      4.21 o
   7  -7   4        2.75        1.30      2.81 o
  -5  -6   4        0.11       -0.60      3.20 o
  -4  -6   4        1.35        1.77      2.99 o
  -3  -6   4       22.34       25.55      4.28 o
  -2  -6   4      212.93      211.63     16.13 o
  -1  -6   4       32.80       41.60      2.46 o
   0  -6   4      136.62      132.49      3.85 o
   1  -6   4        5.12        4.57      1.32 o
   2  -6   4      219.34      210.15      4.80 o
   3  -6   4      386.44      367.12      6.22 o
   4  -6   4       14.42       16.32      1.61 o
   5  -6   4      165.66      158.98      6.27 o
   6  -6   4      105.26      110.36      4.50 o
   7  -6   4        0.29        0.49      2.95 o
   8  -6   4        1.82        3.06      3.24 o
  -6  -5   4        3.34        2.48      3.92 o
  -5  -5   4        0.71        0.01      2.95 o
  -4  -5   4        8.01        7.10      3.21 o
  -3  -5   4       56.32       53.63      3.90 o
  -2  -5   4      102.30       93.03      2.53 o
  -1  -5   4      215.65      221.88      4.76 o
   0  -5   4      322.26      323.84      4.96 o
   1  -5   4       21.91       19.75      1.35 o
   2  -5   4       68.91       66.38      2.39 o
   3  -5   4      236.53      224.49      4.09 o
   4  -5   4        3.37        5.04      1.03 o
   5  -5   4        1.00        1.87      1.21 o
   6  -5   4       48.64       50.35      3.12 o
   7  -5   4        0.16        1.77      1.72 o
   8  -5   4        5.16        2.75      3.23 o
  -7  -4   4        7.17        6.09      4.46 o
  -6  -4   4        4.77        1.55      3.53 o
  -5  -4   4        0.97       -2.01      2.44 o
  -4  -4   4      118.92      127.07      9.44 o
  -3  -4   4       37.66       37.69      3.12 o
  -2  -4   4       14.15       13.00      0.97 o
  -1  -4   4       85.37       82.43      2.22 o
   0  -4   4      241.97      250.85      3.75 o
   1  -4   4       91.92       95.91      1.97 o
   2  -4   4      109.20      113.60      2.26 o
   3  -4   4       49.61       47.61      1.58 o
   4  -4   4      166.06      167.79      4.19 o
   5  -4   4       81.16       86.18      3.39 o
   6  -4   4       20.90       23.61      2.30 o
   7  -4   4        6.11        5.95      2.04 o
   8  -4   4        4.96        9.53      3.24 o
  -7  -3   4        0.07        1.64      3.47 o
  -6  -3   4      101.41       97.63      7.37 o
  -5  -3   4       19.10       17.03      2.72 o
  -4  -3   4       15.69       15.82      2.41 o
  -3  -3   4      239.46      238.71      4.48 o
  -2  -3   4       30.05       27.10      1.50 o
  -1  -3   4      974.86     1103.86     10.34 o
   0  -3   4       14.41       12.74      0.86 o
   1  -3   4        0.01        0.12      0.45 o
   2  -3   4        0.89        0.44      0.47 o
   3  -3   4       49.75       51.57      1.74 o
   4  -3   4       96.66      103.09      2.88 o
   5  -3   4       23.76       23.40      2.06 o
   6  -3   4       26.05       27.67      2.36 o
   7  -3   4        0.33        1.95      1.72 o
   8  -3   4        3.60        6.70      2.73 o
  -8  -2   4       11.46        6.96      6.25 o
  -7  -2   4       16.17       13.29      3.03 o
  -6  -2   4       32.31       35.17      3.55 o
  -5  -2   4       57.08       53.66      3.82 o
  -4  -2   4      429.85      426.82      4.70 o
  -3  -2   4      323.68      342.65      5.32 o
  -2  -2   4     1910.65     2047.12     31.26 o
  -1  -2   4      920.43      949.95     11.45 o
   0  -2   4      113.26      123.21      1.73 o
   1  -2   4       27.56       28.09      0.74 o
   2  -2   4       50.59       48.65      1.03 o
   3  -2   4        5.29        6.43      0.64 o
   4  -2   4        2.83        1.77      0.86 o
   5  -2   4      320.90      314.11      5.80 o
   6  -2   4       16.74       17.03      2.03 o
   7  -2   4       35.57       44.94      3.42 o
   8  -2   4        0.73        0.65      2.17 o
  -8  -1   4        0.07       -1.87      2.79 o
  -7  -1   4      109.81      116.89      7.01 o
  -6  -1   4       72.73       76.98      5.15 o
  -5  -1   4       71.00       68.21      2.15 o
  -4  -1   4       58.99       66.86      1.63 o
  -3  -1   4      138.31      141.70      2.94 o
  -2  -1   4      487.85      487.36      8.97 o
  -1  -1   4     2574.46     2546.40     29.63 o
   0  -1   4      931.37      887.84     11.28 o
   1  -1   4       15.32       16.70      0.93 o
   2  -1   4       24.42       31.16      1.02 o
   3  -1   4      511.58      504.93      5.60 o
   4  -1   4      230.77      231.36      4.46 o
   5  -1   4      184.25      184.68      4.56 o
   6  -1   4       34.02       40.95      2.65 o
   7  -1   4        0.03        2.40      1.68 o
   8  -1   4        3.83       10.02      3.69 o
  -8   0   4       18.41       16.39      4.11 o
  -7   0   4       36.58       31.76      3.50 o
  -6   0   4       75.95       78.63      3.04 o
  -5   0   4       87.02       85.68      5.22 o
  -4   0   4        3.91        3.26      0.87 o
  -3   0   4      111.81      125.93      2.08 o
  -2   0   4     1580.68     1655.71     12.85 o
  -1   0   4       68.84       59.34      3.38 o
   0   0   4     1109.18      988.13     35.92 o
   1   0   4     1540.56     1486.91     35.11 o
   2   0   4      948.08      948.70     10.64 o
   3   0   4      159.07      166.79      2.79 o
   4   0   4       73.28       76.18      2.73 o
   5   0   4        5.34        5.25      1.32 o
   6   0   4       73.10       71.62      2.93 o
   7   0   4       15.04       17.32      3.88 o
   8   0   4        0.09        6.52      5.62 o
  -9   1   4        5.48        7.48      3.68 o
  -8   1   4       11.29       17.84      6.41 o
  -7   1   4        2.18        1.83      1.45 o
  -6   1   4      226.03      222.69      4.89 o
  -5   1   4      149.37      146.80      3.41 o
  -4   1   4      554.36      567.16      8.37 o
  -3   1   4        6.50        8.20      0.97 o
  -2   1   4       41.29       41.41      1.37 o
  -1   1   4     1236.90     1203.09      8.01 o
   0   1   4      959.24      969.26      7.85 o
   1   1   4     3115.78     2995.52     56.05 o
   2   1   4        0.04       -0.56      0.56 o
   3   1   4      119.19      117.77      3.28 o
   4   1   4        4.65        3.54      1.02 o
   5   1   4       51.51       55.02      2.66 o
   6   1   4        7.22        7.55      2.60 o
   7   1   4        0.09        2.95      3.00 o
   8   1   4        0.03        1.31      6.03 o
  -9   2   4       16.43       16.21      4.60 o
  -8   2   4        4.73        5.73      3.40 o
  -7   2   4        6.63        3.78      1.70 o
  -6   2   4        4.00        4.83      1.40 o
  -5   2   4       55.00       50.16      2.26 o
  -4   2   4       59.40       57.22      2.15 o
  -3   2   4      136.72      151.00      3.05 o
  -2   2   4        1.03        1.95      0.86 o
  -1   2   4      119.87      109.97      2.34 o
   0   2   4      270.54      270.46      2.72 o
   1   2   4       22.11       19.70      1.18 o
   2   2   4       31.12       31.36      1.70 o
   3   2   4        5.82        7.52      1.26 o
   4   2   4       20.51       21.02      1.41 o
   5   2   4       10.54        6.36      2.31 o
   6   2   4        3.31        3.10      2.94 o
   7   2   4        7.08        2.66      5.83 o
  -9   3   4        0.67        2.34      3.15 o
  -8   3   4        3.06        1.92      1.69 o
  -7   3   4        0.81       -0.94      1.20 o
  -6   3   4      183.97      184.19      4.54 o
  -5   3   4       11.03       12.87      1.37 o
  -4   3   4       80.00       84.53      2.62 o
  -3   3   4        9.61       10.34      1.09 o
  -2   3   4       77.23       95.83      2.18 o
  -1   3   4       54.86       49.12      2.01 o
   0   3   4      208.22      223.87      3.85 o
   1   3   4       11.30       11.91      1.36 o
   2   3   4       24.45       25.58      1.90 o
   3   3   4       36.77       37.92      2.19 o
   4   3   4       68.17       70.86      4.34 o
   5   3   4       32.49       31.13      3.48 o
   6   3   4       30.38       30.82      7.67 o
   7   3   4        1.88       -1.59      5.81 o
  -9   4   4        0.04        0.79      2.36 o
  -8   4   4       23.43       22.17      2.79 o
  -7   4   4        0.30        0.88      1.31 o
  -6   4   4      306.67      297.74      5.90 o
  -5   4   4        0.17       -0.56      1.00 o
  -4   4   4       30.00       29.81      2.04 o
  -3   4   4       32.90       31.70      1.83 o
  -2   4   4       79.74       93.10      3.37 o
  -1   4   4      303.36      317.45      6.15 o
   0   4   4       35.00       33.55      1.78 o
   1   4   4        3.00        0.88      1.07 o
   2   4   4        6.47        5.36      1.48 o
   3   4   4       14.67       12.72      3.33 o
   4   4   4       16.52       18.68      4.89 o
   5   4   4       33.07       29.05      4.66 o
   6   4   4        0.85       -4.90      4.90 o
  -8   5   4        4.88        7.12      2.46 o
  -7   5   4       10.79        7.49      1.92 o
  -6   5   4        3.16        5.06      1.58 o
  -5   5   4      187.59      176.28      4.87 o
  -4   5   4       11.90        7.79      1.39 o
  -3   5   4        2.04        1.83      0.92 o
  -2   5   4       90.15       92.50      3.66 o
  -1   5   4        9.21        7.84      1.01 o
   0   5   4      217.97      241.29      7.36 o
   1   5   4        3.52        1.90      1.50 o
   2   5   4       31.08       30.15      2.74 o
   3   5   4        4.64        3.56      3.15 o
   4   5   4       13.88       11.31      5.62 o
   5   5   4        1.98       -0.22      4.79 o
  -8   6   4       15.86       19.81      3.85 o
  -7   6   4       79.35       86.38      5.04 o
  -6   6   4        0.46       -0.89      1.31 o
  -5   6   4        7.08        6.87      1.59 o
  -4   6   4       40.57       44.50      2.60 o
  -3   6   4       25.35       24.82      2.54 o
  -2   6   4       27.17       25.42      2.45 o
  -1   6   4       23.41       28.56      2.40 o
   0   6   4       71.98       70.02      4.87 o
   1   6   4        5.34        3.12      1.93 o
   2   6   4       33.91       38.81      5.04 o
   3   6   4       14.33       15.21      4.27 o
   4   6   4        1.35       -0.36      4.63 o
  -8   7   4        5.94        8.79      3.44 o
  -7   7   4       19.96       24.80      4.03 o
  -6   7   4        1.12        3.10      2.07 o
  -5   7   4        0.14        0.90      1.75 o
  -4   7   4       18.11       14.99      3.58 o
  -3   7   4      124.85      123.96      5.09 o
  -2   7   4       68.08       68.42      3.88 o
  -1   7   4       13.68       10.44      2.70 o
   0   7   4       70.10       65.40      4.01 o
   1   7   4      147.23      148.68      8.51 o
   2   7   4        2.08       -0.46      3.25 o
   3   7   4        4.55        6.03      5.29 o
  -7   8   4        1.73        3.75      2.86 o
  -6   8   4       22.08       32.19      4.42 o
  -5   8   4        6.57        2.98      2.27 o
  -4   8   4       25.89       32.72      3.49 o
  -3   8   4       21.10       23.43      3.05 o
  -2   8   4        1.93        0.85      2.35 o
  -1   8   4       54.90       55.87      4.82 o
   0   8   4       35.32       35.12      5.38 o
   1   8   4        6.12        3.97      3.62 o
   2   8   4        0.92       -1.67      4.55 o
  -5   9   4        0.06       -0.83      2.57 o
  -4   9   4        6.24        7.56      3.01 o
  -3   9   4        0.50        0.17      2.70 o
  -2   9   4       41.44       34.69      5.76 o
  -1   9   4        6.27        7.50      3.27 o
   0   9   4        0.31       -3.42      6.38 o
  -1  -9   5        7.01        1.94      5.18 o
   0  -9   5        8.12        9.92      4.04 o
   1  -9   5       20.54       18.96      2.84 o
   2  -9   5       33.33       41.03      2.95 o
   3  -9   5        3.08        4.81      1.89 o
   4  -9   5       11.50       19.04      5.42 o
   5  -9   5       26.31       28.52      5.17 o
  -3  -8   5       11.84        6.88      6.57 o
  -2  -8   5        0.92        4.05      3.38 o
  -1  -8   5       13.42       12.92      4.01 o
   0  -8   5        2.48        2.55      2.06 o
   1  -8   5       10.92       13.02      2.06 o
   2  -8   5       89.15       88.15      3.99 o
   3  -8   5       29.17       31.80      2.48 o
   4  -8   5       18.43       19.12      2.79 o
   5  -8   5        0.60        2.26      2.65 o
   6  -8   5        3.73        6.32      5.56 o
  -4  -7   5        2.43       -0.52      5.59 o
  -3  -7   5        3.52        6.05      3.68 o
  -2  -7   5       21.06       17.82      4.09 o
  -1  -7   5       16.32       10.14      2.50 o
   0  -7   5       90.65       93.56      3.69 o
   1  -7   5        3.86        1.02      1.13 o
   2  -7   5        2.11        2.39      1.37 o
   3  -7   5       35.86       32.93      2.50 o
   4  -7   5      240.97      234.09      6.67 o
   5  -7   5       14.72       18.35      2.38 o
   6  -7   5        8.72        7.73      2.92 o
   7  -7   5        3.19        5.30      3.08 o
  -5  -6   5        5.86        1.80      3.65 o
  -4  -6   5       12.32       10.00      3.88 o
  -3  -6   5       12.24       13.66      4.59 o
  -2  -6   5       24.07       25.92      3.12 o
  -1  -6   5      124.20      125.48      3.75 o
   0  -6   5        2.11        1.70      1.13 o
   1  -6   5       51.89       47.14      3.59 o
   2  -6   5      350.78      345.24      7.02 o
   3  -6   5       30.17       23.18      2.03 o
   4  -6   5      123.28      116.76      5.37 o
   5  -6   5        0.00        0.12      1.18 o
   6  -6   5       40.57       34.46      3.44 o
   7  -6   5       10.70        9.81      3.74 o
   8  -6   5        4.13        4.03      3.41 o
  -6  -5   5        0.35       -0.42      3.52 o
  -5  -5   5        4.18        1.46      3.07 o
  -4  -5   5       53.70       47.59      5.50 o
  -3  -5   5      180.27      170.34      6.36 o
  -2  -5   5      337.35      316.11      6.30 o
  -1  -5   5       41.95       44.53      2.07 o
   0  -5   5      377.87      382.22      5.27 o
   1  -5   5       10.66       14.58      1.39 o
   2  -5   5        1.58        1.05      1.02 o
   3  -5   5       94.20       97.58      2.84 o
   4  -5   5        4.12        3.93      1.00 o
   5  -5   5       96.86       91.36      3.65 o
   6  -5   5       12.70       14.46      2.08 o
   7  -5   5       25.46       21.74      3.59 o
   8  -5   5        0.14       -0.42      2.67 o
  -7  -4   5        0.55       -4.36      4.74 o
  -6  -4   5        0.27        0.13      3.17 o
  -5  -4   5        4.59        4.07      2.35 o
  -4  -4   5       90.57       78.74      4.60 o
  -3  -4   5        5.35        5.31      1.06 o
  -2  -4   5       98.11       97.81      2.29 o
  -1  -4   5      253.98      253.26      3.78 o
   0  -4   5      139.71      138.12      2.94 o
   1  -4   5        9.81       14.22      1.04 o
   2  -4   5       19.61       21.08      1.17 o
   3  -4   5        9.88       13.51      1.03 o
   4  -4   5       11.90       11.75      1.48 o
   5  -4   5       26.19       27.05      2.16 o
   6  -4   5       43.62       42.95      2.86 o
   7  -4   5        0.00        0.14      2.07 o
   8  -4   5      107.90      135.08      7.29 o
  -7  -3   5       22.84       25.31      5.19 o
  -6  -3   5        8.94        9.81      2.72 o
  -5  -3   5      224.97      222.99      8.37 o
  -4  -3   5      107.08      111.79      5.01 o
  -3  -3   5      177.76      195.71      5.93 o
  -2  -3   5       79.46       83.95      3.22 o
  -1  -3   5        6.60        3.36      0.70 o
   0  -3   5      257.90      279.45      3.35 o
   1  -3   5      233.94      241.45      2.66 o
   2  -3   5       14.41       16.40      0.79 o
   3  -3   5       65.17       60.42      1.84 o
   4  -3   5      145.31      150.42      3.34 o
   5  -3   5        2.38        0.44      1.12 o
   6  -3   5       22.31       20.14      2.19 o
   7  -3   5        0.05        1.44      1.71 o
   8  -3   5        5.49        6.24      2.81 o
  -8  -2   5        0.02        1.51      5.42 o
  -7  -2   5        4.02        7.74      2.79 o
  -6  -2   5       76.64       74.48      4.83 o
  -5  -2   5       24.88       23.99      2.05 o
  -4  -2   5        0.06        1.04      1.01 o
  -3  -2   5       65.84       68.41      2.88 o
  -2  -2   5      735.75      753.51      6.53 o
  -1  -2   5      223.12      215.05      7.91 o
   0  -2   5      272.00      274.49      2.98 o
   1  -2   5       28.94       29.39      1.20 o
   2  -2   5       39.79       42.26      1.04 o
   3  -2   5       42.57       44.03      1.28 o
   4  -2   5        7.47        5.87      0.89 o
   5  -2   5       17.02       16.54      1.91 o
   6  -2   5        8.12        8.15      1.74 o
   7  -2   5        0.40        2.45      1.77 o
   8  -2   5        1.02       -0.35      2.65 o
  -8  -1   5        0.18        0.30      2.86 o
  -7  -1   5       26.15       20.33     11.92 o
  -6  -1   5        2.83        0.34      1.77 o
  -5  -1   5      101.49       98.41      2.49 o
  -4  -1   5       82.42       83.02      2.32 o
  -3  -1   5       15.27       21.75      1.03 o
  -2  -1   5       65.34       82.78      1.92 o
  -1  -1   5      896.27      900.06     10.71 o
   0  -1   5      361.35      358.52      5.24 o
   1  -1   5        0.18        0.63      0.52 o
   2  -1   5       35.28       39.40      1.14 o
   3  -1   5       81.51       82.21      1.98 o
   4  -1   5       46.58       45.20      2.33 o
   5  -1   5       48.12       51.38      2.76 o
   6  -1   5        0.00        1.60      1.37 o
   7  -1   5        6.72        5.11      2.31 o
   8  -1   5        6.12       10.05      5.40 o
  -8   0   5       14.69       17.26      4.30 o
  -7   0   5       32.51       34.18      3.69 o
  -6   0   5       17.95       15.68      1.75 o
  -5   0   5       56.35       56.64      2.28 o
  -4   0   5       47.47       54.66      2.03 o
  -3   0   5        2.54        0.28      0.58 o
  -2   0   5       96.57       92.41      1.76 o
  -1   0   5      294.81      292.90      3.12 o
   0   0   5        3.99        3.53      0.54 o
   1   0   5      492.12      473.65      4.51 o
   2   0   5       68.97       70.68      1.67 o
   3   0   5      137.42      150.09      2.77 o
   4   0   5       98.54      101.90      2.70 o
   5   0   5        7.39        5.65      1.53 o
   6   0   5        0.07       -0.41      1.15 o
   7   0   5        3.22        4.80      3.05 o
   8   0   5        0.02        5.70      5.59 o
  -9   1   5        1.85        3.54      3.63 o
  -8   1   5        6.95        7.10      3.42 o
  -7   1   5       45.69       41.58      2.72 o
  -6   1   5      199.32      191.61      4.65 o
  -5   1   5        2.05        0.12      1.03 o
  -4   1   5       34.51       33.69      3.77 o
  -3   1   5      274.27      290.19      4.58 o
  -2   1   5      141.39      142.30      2.74 o
  -1   1   5       80.77       90.54      1.99 o
   0   1   5      384.81      374.00      4.06 o
   1   1   5      762.91      767.03      8.74 o
   2   1   5     2838.03     2709.27    115.02 o
   3   1   5       39.26       34.17      3.73 o
   4   1   5        1.36        0.65      1.02 o
   5   1   5       65.27       69.00      2.95 o
   6   1   5       20.55       21.15      3.27 o
   7   1   5        5.59        8.58      3.60 o
  -9   2   5        8.32       14.39      4.61 o
  -8   2   5       13.66       11.37      4.94 o
  -7   2   5       44.97       38.86      2.54 o
  -6   2   5       33.49       34.43      2.41 o
  -5   2   5       25.10       22.72      2.97 o
  -4   2   5       12.75       11.44      1.61 o
  -3   2   5      292.64      311.40      5.51 o
  -2   2   5       21.66       21.57      1.38 o
  -1   2   5       84.97       91.13      2.51 o
   0   2   5      238.18      246.41      2.94 o
   1   2   5       62.51       60.64      1.74 o
   2   2   5        0.03        0.85      0.92 o
   3   2   5       10.57        9.67      1.43 o
   4   2   5        3.82        3.47      1.70 o
   5   2   5        0.95        1.65      1.94 o
   6   2   5        8.16        7.76      2.72 o
   7   2   5        0.40       -5.51      5.51 o
  -9   3   5        0.44        4.81      3.30 o
  -8   3   5        0.19        0.10      1.79 o
  -7   3   5       33.52       34.16      5.83 o
  -6   3   5       21.68       22.42      2.17 o
  -5   3   5      111.78      109.93      3.66 o
  -4   3   5        0.36        1.31      0.97 o
  -3   3   5       31.04       36.48      1.88 o
  -2   3   5      114.24      115.19      2.28 o
  -1   3   5       25.45       35.05      1.90 o
   0   3   5       19.33       20.30      1.44 o
   1   3   5       28.40       26.53      1.50 o
   2   3   5      111.01      116.61      4.50 o
   3   3   5        0.01       -0.16      1.14 o
   4   3   5       32.19       33.17      3.33 o
   5   3   5        2.09        2.46      2.27 o
   6   3   5        0.01       -4.44      4.63 o
  -9   4   5        8.42       10.47      4.15 o
  -8   4   5        0.86        1.81      2.06 o
  -7   4   5       16.04       13.68      2.20 o
  -6   4   5       43.17       40.70      2.81 o
  -5   4   5      135.50      120.26      3.96 o
  -4   4   5       43.10       47.36      2.43 o
  -3   4   5       92.16       87.06      2.73 o
  -2   4   5      160.48      171.81      4.56 o
  -1   4   5        1.34        2.00      1.10 o
   0   4   5      133.48      134.56      2.42 o
   1   4   5        0.70        1.92      0.96 o
   2   4   5       10.39        9.50      1.49 o
   3   4   5       55.93       53.67      3.90 o
   4   4   5        1.99        0.89      2.14 o
   5   4   5        1.00       -1.17      2.85 o
   6   4   5        0.97       -5.07      5.07 o
  -8   5   5        4.78        3.12      2.57 o
  -7   5   5        0.69        0.88      1.63 o
  -6   5   5       33.41       28.78      2.57 o
  -5   5   5       61.17       58.34      3.04 o
  -4   5   5      316.11      302.89      5.68 o
  -3   5   5       69.65       72.78      3.58 o
  -2   5   5        5.79        7.85      1.61 o
  -1   5   5       19.16       20.64      2.00 o
   0   5   5        0.89        0.84      0.76 o
   1   5   5      183.39      176.58      5.03 o
   2   5   5        3.84        4.33      1.82 o
   3   5   5       25.68       26.53      4.40 o
   4   5   5       32.26       34.53      6.62 o
   5   5   5        0.81       -1.70      5.20 o
  -8   6   5       16.82       21.06      4.07 o
  -7   6   5       10.70       12.04      2.74 o
  -6   6   5        0.00        0.77      1.68 o
  -5   6   5      180.36      175.62      6.18 o
  -4   6   5       27.18       21.95      2.64 o
  -3   6   5      261.56      270.03      6.84 o
  -2   6   5       23.00       22.70      2.38 o
  -1   6   5       21.73       25.25      2.37 o
   0   6   5       66.74       66.12      4.29 o
   1   6   5        1.93       -0.37      1.78 o
   2   6   5       42.26       49.49      5.70 o
   3   6   5       15.46       16.95      4.49 o
   4   6   5       13.91       15.37      6.90 o
  -7   7   5        0.01        1.24      2.46 o
  -6   7   5       21.32       20.62      3.17 o
  -5   7   5        0.96        0.76      1.78 o
  -4   7   5        0.46       -0.58      1.51 o
  -3   7   5        4.34        3.63      1.81 o
  -2   7   5      139.15      139.39      5.22 o
  -1   7   5        2.72        0.86      2.04 o
   0   7   5       32.34       32.09      3.28 o
   1   7   5        7.74        9.55      3.88 o
   2   7   5       15.02       13.98      4.43 o
   3   7   5       27.40       21.91      7.51 o
  -6   8   5        1.29        0.51      2.38 o
  -5   8   5        1.01        0.93      2.22 o
  -4   8   5        7.67        6.10      2.28 o
  -3   8   5       24.31       22.92      3.12 o
  -2   8   5        1.91        1.67      2.51 o
  -1   8   5       21.91       20.06      4.73 o
   0   8   5       55.31       61.61      6.69 o
   1   8   5        1.85        1.58      3.78 o
  -5   9   5        2.56        3.64      2.93 o
  -4   9   5        1.14        0.99      3.54 o
  -3   9   5        2.21       -1.78      3.08 o
  -2   9   5        4.05        1.89      3.64 o
  -1   9   5        0.06        0.73      2.71 o
  -1  -9   6       16.25       13.94      6.68 o
   0  -9   6       30.09       39.05      5.64 o
   1  -9   6        3.35        4.94      2.60 o
   2  -9   6       33.97       43.67      3.12 o
   3  -9   6       39.33       48.09      4.80 o
   4  -9   6       30.29       33.66      5.45 o
   5  -9   6       15.60       18.88      4.73 o
  -3  -8   6        7.44        8.55      6.74 o
  -2  -8   6       48.74       53.09      6.45 o
  -1  -8   6       16.13       15.14      4.10 o
   0  -8   6       25.00       22.51      3.30 o
   1  -8   6        9.94       12.44      1.89 o
   2  -8   6       30.18       35.33      2.64 o
   3  -8   6        2.10        2.06      1.81 o
   4  -8   6        8.67        8.77      2.84 o
   5  -8   6        6.57        5.83      3.19 o
   6  -8   6       26.13       30.78      5.36 o
  -4  -7   6        5.99        3.59      6.16 o
  -3  -7   6        6.58        6.16      3.61 o
  -2  -7   6        0.78       -1.03      1.92 o
  -1  -7   6        8.84       11.00      2.60 o
   0  -7   6       22.74       16.09      2.15 o
   1  -7   6       49.50       48.95      2.90 o
   2  -7   6       44.39       34.39      2.55 o
   3  -7   6        1.63        2.02      1.39 o
   4  -7   6       13.28       12.34      2.27 o
   5  -7   6       52.57       57.75      4.93 o
   6  -7   6        0.00       -0.60      2.37 o
   7  -7   6        3.26        5.12      3.29 o
  -5  -6   6        0.33        0.41      5.09 o
  -4  -6   6       11.64       15.87      4.34 o
  -3  -6   6        0.81       -1.31      1.92 o
  -2  -6   6       43.50       42.72      3.78 o
  -1  -6   6      157.60      150.53      4.11 o
   0  -6   6       43.88       46.65      2.62 o
   1  -6   6      466.38      439.56      6.98 o
   2  -6   6       71.87       65.22      2.98 o
   3  -6   6       25.06       28.21      2.15 o
   4  -6   6      107.52      104.23      3.87 o
   5  -6   6        0.26        0.30      1.56 o
   6  -6   6       43.10       48.45      4.63 o
   7  -6   6        1.57        0.36      2.54 o
   8  -6   6        1.94        3.21      3.24 o
  -6  -5   6        0.59        3.30      4.11 o
  -5  -5   6        2.63        2.17      3.45 o
  -4  -5   6        0.66       -0.42      1.95 o
  -3  -5   6      205.79      194.38      6.85 o
  -2  -5   6       48.01       44.51      2.49 o
  -1  -5   6       18.93       18.04      1.56 o
   0  -5   6      357.00      350.36      5.62 o
   1  -5   6        4.19        3.76      1.10 o
   2  -5   6       65.70       69.30      2.38 o
   3  -5   6       10.41        9.17      1.16 o
   4  -5   6       44.83       41.27      2.44 o
   5  -5   6       13.07       13.71      1.88 o
   6  -5   6       80.74       82.20      4.58 o
   7  -5   6       21.95       22.65      3.93 o
   8  -5   6        0.10        0.80      3.03 o
  -7  -4   6        5.32        1.64      6.05 o
  -6  -4   6       11.03        7.61      3.90 o
  -5  -4   6       35.14       35.55      3.78 o
  -4  -4   6      168.07      159.98      7.74 o
  -3  -4   6       17.89       15.56      1.37 o
  -2  -4   6      379.24      391.66      7.66 o
  -1  -4   6      109.03      112.57      2.78 o
   0  -4   6        9.13       10.72      1.04 o
   1  -4   6      357.16      365.58      4.04 o
   2  -4   6      185.16      189.90      2.61 o
   3  -4   6      106.82      109.79      2.38 o
   4  -4   6        1.88        1.48      1.01 o
   5  -4   6        1.92        1.83      1.17 o
   6  -4   6       10.72       13.14      2.34 o
   7  -4   6        0.06        1.92      2.19 o
   8  -4   6       45.91       59.56      6.34 o
  -7  -3   6       10.64       12.58      4.53 o
  -6  -3   6        1.86        2.84      2.35 o
  -5  -3   6        8.56        5.83      2.34 o
  -4  -3   6        0.34        0.16      1.21 o
  -3  -3   6       81.17       81.47      2.77 o
  -2  -3   6      206.59      216.08      5.30 o
  -1  -3   6       66.87       72.82      1.95 o
   0  -3   6        3.83       -0.04      0.59 o
   1  -3   6      467.32      457.85      4.99 o
   2  -3   6       14.18       13.67      0.77 o
   3  -3   6       88.09       94.84      2.31 o
   4  -3   6       20.42       21.50      1.54 o
   5  -3   6        0.26       -0.90      1.00 o
   6  -3   6       45.12       46.77      2.92 o
   7  -3   6       31.86       39.16      4.14 o
   8  -3   6        5.46        9.91      3.68 o
  -8  -2   6        3.96        4.26      4.13 o
  -7  -2   6       30.52       30.76      3.99 o
  -6  -2   6       85.11       86.27      5.20 o
  -5  -2   6      198.07      189.02     11.07 o
  -4  -2   6      117.68      118.72      3.32 o
  -3  -2   6      104.83      110.60      3.09 o
  -2  -2   6      162.11      175.71      2.45 o
  -1  -2   6     1615.37     1628.67     25.51 o
   0  -2   6       45.96       54.68      1.47 o
   1  -2   6      222.94      234.33      2.92 o
   2  -2   6        7.28        7.37      0.95 o
   3  -2   6       26.17       28.86      1.20 o
   4  -2   6        0.00       -0.02      0.71 o
   5  -2   6        8.07        5.38      1.48 o
   6  -2   6        0.83        1.33      1.30 o
   7  -2   6       12.78       15.65      3.02 o
   8  -2   6       15.51       27.87      9.11 o
  -8  -1   6        0.01       -2.75      2.75 o
  -7  -1   6       62.45       63.18      4.89 o
  -6  -1   6        5.12        4.97      2.29 o
  -5  -1   6      778.56      759.14      9.93 o
  -4  -1   6        5.10        8.50      0.93 o
  -3  -1   6      317.75      330.27      4.28 o
  -2  -1   6      610.54      616.54     35.17 o
  -1  -1   6       14.20       17.53      0.98 o
   0  -1   6      645.84      619.78      8.03 o
   1  -1   6       32.12       29.58      1.35 o
   2  -1   6        7.89       10.90      0.73 o
   3  -1   6        0.64        0.11      0.64 o
   4  -1   6      239.09      236.34      4.73 o
   5  -1   6      170.10      174.18      4.59 o
   6  -1   6       39.99       49.75      3.01 o
   7  -1   6       22.90       31.18      3.85 o
   8  -1   6        0.17        5.75      5.20 o
  -8   0   6       14.27       19.51      4.41 o
  -7   0   6        8.03        5.80      2.44 o
  -6   0   6      252.18      233.14      6.03 o
  -5   0   6      154.17      151.56      3.50 o
  -4   0   6       84.46       82.59      2.51 o
  -3   0   6      204.34      228.55      3.64 o
  -2   0   6      746.14      778.40     12.85 o
  -1   0   6      436.33      425.43      5.10 o
   0   0   6       15.17       13.10      0.82 o
   1   0   6     1843.50     1834.60     18.83 o
   2   0   6     1177.80     1234.73     22.11 o
   3   0   6      562.37      551.65      8.80 o
   4   0   6      370.88      369.55      5.83 o
   5   0   6        1.66        1.87      1.33 o
   6   0   6       53.60       54.28      3.08 o
   7   0   6        0.11       -0.56      2.78 o
  -9   1   6        0.11        1.01      4.85 o
  -8   1   6       19.33       17.46      4.41 o
  -7   1   6       32.47       34.61      3.12 o
  -6   1   6       52.99       50.48      2.75 o
  -5   1   6       75.63       62.16     11.33 o
  -4   1   6      125.13      133.89      3.51 o
  -3   1   6        7.53        8.74      1.16 o
  -2   1   6      144.14      140.96      2.95 o
  -1   1   6        0.32        0.08      0.67 o
   0   1   6      125.00      129.85      2.22 o
   1   1   6      184.74      197.03      2.64 o
   2   1   6     1162.78     1150.40     16.94 o
   3   1   6       26.46       28.77      1.72 o
   4   1   6       23.29       22.39      2.08 o
   5   1   6       31.90       23.32      6.07 o
   6   1   6       19.55       16.88      3.12 o
   7   1   6       25.81       25.17      4.68 o
  -9   2   6        1.85        5.45      3.65 o
  -8   2   6        7.65       12.71      3.96 o
  -7   2   6       89.01       82.76      4.22 o
  -6   2   6      143.65      135.68      4.81 o
  -5   2   6      555.62      480.72      9.93 o
  -4   2   6      136.64      136.82      4.20 o
  -3   2   6       51.13       53.05      2.64 o
  -2   2   6       60.64       57.71      2.35 o
  -1   2   6       51.77       61.96      1.71 o
   0   2   6      201.42      195.93      3.01 o
   1   2   6      517.58      516.66      7.63 o
   2   2   6       44.53       45.00      1.81 o
   3   2   6       76.98       80.92      2.41 o
   4   2   6        0.02       -0.74      1.45 o
   5   2   6        5.06        5.43      2.45 o
   6   2   6        1.22        1.35      4.22 o
   7   2   6        1.23       -2.93      5.34 o
  -9   3   6       10.38       12.40      5.16 o
  -8   3   6        0.09        0.93      2.04 o
  -7   3   6       78.09       66.35      4.13 o
  -6   3   6        0.01       -0.49      1.16 o
  -5   3   6       40.15       35.49      2.39 o
  -4   3   6       10.37        8.58      1.40 o
  -3   3   6      198.25      191.26      4.37 o
  -2   3   6       59.17       54.34      2.70 o
  -1   3   6      342.63      354.23      5.28 o
   0   3   6      112.56      113.33      3.01 o
   1   3   6        3.56        1.97      0.73 o
   2   3   6       42.58       44.06      2.35 o
   3   3   6       21.18       21.36      2.17 o
   4   3   6        3.47        2.23      1.98 o
   5   3   6        0.00        1.61      2.40 o
   6   3   6       14.46        7.34      6.46 o
  -9   4   6       14.14       21.71      5.12 o
  -8   4   6        1.95        3.82      2.16 o
  -7   4   6       37.61       34.11      2.95 o
  -6   4   6       17.12       16.94      2.11 o
  -5   4   6      117.46      109.27      3.86 o
  -4   4   6       68.70       72.80      2.95 o
  -3   4   6       23.30       24.89      1.62 o
  -2   4   6       73.32       80.14      3.40 o
  -1   4   6      105.78       96.09      3.49 o
   0   4   6        3.72        6.91      1.34 o
   1   4   6      141.80      145.05      3.35 o
   2   4   6        4.82        4.04      1.33 o
   3   4   6       53.36       47.00      3.75 o
   4   4   6       29.44       27.20      3.48 o
   5   4   6        1.01        0.33      3.22 o
   6   4   6        0.06       -1.97      5.89 o
  -8   5   6        3.86        5.39      2.79 o
  -7   5   6        8.76        5.84      1.91 o
  -6   5   6       39.69       34.70      2.79 o
  -5   5   6       44.97       44.70      2.77 o
  -4   5   6       84.53       80.48      3.09 o
  -3   5   6       32.78       30.60      2.68 o
  -2   5   6        3.45        2.71      1.34 o
  -1   5   6       79.94       83.41      3.55 o
   0   5   6       20.75       21.20      1.94 o
   1   5   6        6.11        3.50      1.74 o
   2   5   6        4.73        1.38      2.56 o
   3   5   6        2.62        0.59      3.03 o
   4   5   6        0.01        1.00      3.25 o
   5   5   6        1.47       -1.23      5.15 o
  -8   6   6        6.21        7.97      3.26 o
  -7   6   6       12.02       15.96      3.50 o
  -6   6   6        0.00        1.01      1.78 o
  -5   6   6       24.95       25.94      3.03 o
  -4   6   6      159.40      160.23      6.00 o
  -3   6   6       12.70       12.54      2.13 o
  -2   6   6       53.09       53.90      3.37 o
  -1   6   6       57.36       63.61      3.38 o
   0   6   6       83.25       80.56      4.77 o
   1   6   6       26.97       23.96      4.33 o
   2   6   6        4.33        2.13      3.20 o
   3   6   6        3.55        1.87      3.45 o
   4   6   6        1.61       -2.00      5.23 o
  -7   7   6        0.01       -1.19      2.30 o
  -6   7   6        0.19        0.16      2.19 o
  -5   7   6       15.56       10.56      2.60 o
  -4   7   6        0.41        1.44      1.78 o
  -3   7   6       10.73       13.89      2.47 o
  -2   7   6       64.64       62.21      3.88 o
  -1   7   6        2.47        2.24      2.34 o
   0   7   6        6.48        6.45      2.65 o
   1   7   6        2.45        4.23      3.52 o
   2   7   6       27.72       28.16      6.68 o
   3   7   6       15.45       17.91      7.23 o
  -6   8   6        7.82        5.56      3.03 o
  -5   8   6        2.38        1.47      2.39 o
  -4   8   6        0.62        1.13      2.06 o
  -3   8   6       20.46       21.03      3.88 o
  -2   8   6        7.05        5.40      2.91 o
  -1   8   6        2.05        0.72      3.29 o
   0   8   6       19.12       19.97      5.19 o
   1   8   6       26.26       17.14      5.09 o
  -4   9   6        6.60        3.22      3.67 o
  -3   9   6        5.02        3.64      3.91 o
  -2   9   6        0.01        0.32      3.65 o
  -1  -9   7        1.53       -1.37      5.01 o
   0  -9   7        7.31        7.29      4.05 o
   1  -9   7        2.19        3.83      2.77 o
   2  -9   7        7.15        8.41      2.58 o
   3  -9   7       11.66       11.45      3.13 o
   4  -9   7       34.21       36.83      5.62 o
   5  -9   7        2.02        1.91      3.28 o
  -3  -8   7        1.63        3.01      6.22 o
  -2  -8   7        9.73        7.96      4.25 o
  -1  -8   7       10.34       12.79      3.31 o
   0  -8   7        0.84        0.57      2.07 o
   1  -8   7        9.01        9.12      2.07 o
   2  -8   7       11.13       16.18      2.12 o
   3  -8   7        7.90        6.04      2.55 o
   4  -8   7        0.77        2.13      2.25 o
   5  -8   7        4.20        4.93      3.35 o
   6  -8   7       10.51       10.83      4.05 o
  -4  -7   7       18.14       20.60      7.72 o
  -3  -7   7        4.36        8.08      4.06 o
  -2  -7   7        3.54        6.97      2.76 o
  -1  -7   7        6.06        5.07      2.26 o
   0  -7   7       10.94        9.31      1.82 o
   1  -7   7       86.69       84.70      3.69 o
   2  -7   7        8.34        7.42      1.56 o
   3  -7   7        0.22        0.18      1.34 o
   4  -7   7       40.58       43.95      4.28 o
   5  -7   7       42.04       45.00      4.52 o
   6  -7   7        1.10        0.43      2.63 o
   7  -7   7        4.55        5.29      3.42 o
  -5  -6   7        0.21        1.94      5.86 o
  -4  -6   7        0.40       -0.88      3.11 o
  -3  -6   7       15.28       10.82      2.80 o
  -2  -6   7        0.45       -0.65      1.88 o
  -1  -6   7      156.64      144.51      4.11 o
   0  -6   7      130.81      105.65      3.70 o
   1  -6   7       30.30       26.55      4.27 o
   2  -6   7      191.71      177.99      4.54 o
   3  -6   7       14.99       14.58      1.57 o
   4  -6   7      264.70      255.61      7.23 o
   5  -6   7       89.85       97.11      5.77 o
   6  -6   7       48.76       44.09      5.92 o
   7  -6   7       74.34       75.56      7.24 o
  -6  -5   7        4.93        3.70      5.97 o
  -5  -5   7        1.22        2.18      3.25 o
  -4  -5   7       44.79       43.62      4.15 o
  -3  -5   7        0.63       -0.59      1.72 o
  -2  -5   7       28.80       29.84      2.66 o
  -1  -5   7       15.94       15.70      1.77 o
   0  -5   7      396.52      375.94      5.97 o
   1  -5   7        0.05       -0.47      1.05 o
   2  -5   7       26.46       25.03      1.64 o
   3  -5   7        0.06       -0.45      0.91 o
   4  -5   7        3.00        2.59      1.19 o
   5  -5   7        0.78        0.06      1.39 o
   6  -5   7       12.52       18.34      3.26 o
   7  -5   7        0.54        0.74      2.30 o
   8  -5   7        6.50        8.85      4.67 o
  -6  -4   7        5.33        2.40      3.71 o
  -5  -4   7        0.00       -0.49      2.10 o
  -4  -4   7        1.71        1.59      2.09 o
  -3  -4   7      541.67      522.10     18.08 o
  -2  -4   7       74.68       69.39      2.24 o
  -1  -4   7      747.86      725.86      6.80 o
   0  -4   7       23.04       22.32      1.56 o
   1  -4   7      216.73      223.05      3.39 o
   2  -4   7      183.59      183.86      2.99 o
   3  -4   7       69.29       73.16      1.95 o
   4  -4   7      197.86      198.49      4.34 o
   5  -4   7       13.20       15.51      2.35 o
   6  -4   7       12.65        7.42      2.09 o
   7  -4   7        0.62        1.22      2.10 o
   8  -4   7        0.00        2.87      3.11 o
  -7  -3   7        0.02       -2.27      4.34 o
  -6  -3   7        2.65        1.22      3.72 o
  -5  -3   7        4.55        5.75      2.37 o
  -4  -3   7      122.31      113.52      4.04 o
  -3  -3   7        0.02        0.57      1.22 o
  -2  -3   7        0.93        1.03      0.74 o
  -1  -3   7      108.25      114.90      2.98 o
   0  -3   7       16.99       23.15      1.11 o
   1  -3   7      153.66      170.28      2.54 o
   2  -3   7       11.37       10.27      1.08 o
   3  -3   7       80.32       87.45      2.89 o
   4  -3   7        5.24        2.98      0.77 o
   5  -3   7      163.63      156.62      4.30 o
   6  -3   7        0.59        2.10      1.68 o
   7  -3   7        6.42       12.61      2.94 o
   8  -3   7       25.84       35.63      5.37 o
  -8  -2   7        2.47        2.05      6.00 o
  -7  -2   7        9.70       14.15      3.27 o
  -6  -2   7       30.03       26.31      3.54 o
  -5  -2   7       34.03       34.22      2.70 o
  -4  -2   7        3.40        3.68      1.39 o
  -3  -2   7      442.86      458.87      8.40 o
  -2  -2   7        6.78        8.34      0.97 o
  -1  -2   7      970.80     1093.89     20.80 o
   0  -2   7       50.30       54.14      1.78 o
   1  -2   7      230.12      244.25      4.32 o
   2  -2   7        4.82        3.18      0.91 o
   3  -2   7       14.06       14.02      1.08 o
   4  -2   7      197.41      204.57      3.62 o
   5  -2   7       12.08       11.30      1.73 o
   6  -2   7       40.10       38.67      2.75 o
   7  -2   7        2.32        1.70      2.19 o
   8  -2   7       29.89       42.21      8.30 o
  -8  -1   7        3.63        3.88      2.76 o
  -7  -1   7        0.05        0.14      2.16 o
  -6  -1   7       55.16       54.45      4.28 o
  -5  -1   7        3.25        3.31      1.53 o
  -4  -1   7       37.89       43.24      1.70 o
  -3  -1   7       26.39       26.28      1.38 o
  -2  -1   7      414.14      438.32      6.51 o
  -1  -1   7      122.46      118.22      2.41 o
   0  -1   7      244.96      231.24      3.57 o
   1  -1   7       26.22       25.35      1.59 o
   2  -1   7        9.16        9.47      0.70 o
   3  -1   7        0.64       -0.32      0.65 o
   4  -1   7      112.15      111.59      3.54 o
   5  -1   7        0.97       -0.57      1.22 o
   6  -1   7        5.19        4.33      1.65 o
   7  -1   7       17.94       20.93      6.11 o
   8  -1   7        0.01        1.86      5.04 o
  -8   0   7        4.31        9.02      3.72 o
  -7   0   7       22.75        9.07      8.40 o
  -6   0   7       79.60       71.02      3.84 o
  -5   0   7       15.77       19.84      1.91 o
  -4   0   7       51.35       44.44      5.49 o
  -3   0   7      196.74      190.91      3.69 o
  -2   0   7       77.49       89.27      2.53 o
  -1   0   7      621.36      636.74      7.45 o
   0   0   7       14.58       13.69      0.91 o
   1   0   7        3.70        4.34      0.68 o
   2   0   7       17.20       18.12      1.11 o
   3   0   7      169.69      176.29      3.79 o
   4   0   7       34.86       35.41      2.39 o
   5   0   7        2.79        2.34      1.39 o
   6   0   7        0.78        2.13      2.18 o
   7   0   7        1.79        4.27      4.66 o
  -8   1   7        9.20       11.78      3.92 o
  -7   1   7        3.10        3.63      1.91 o
  -6   1   7       28.26       21.12      2.24 o
  -5   1   7      282.21      269.95      5.37 o
  -4   1   7       81.63       80.69      2.97 o
  -3   1   7      910.70      912.82     13.09 o
  -2   1   7      105.33      118.35      3.40 o
  -1   1   7      188.33      203.01      3.01 o
   0   1   7      486.68      493.47      9.14 o
   1   1   7      191.76      186.65      3.09 o
   2   1   7      335.59      317.77      5.20 o
   3   1   7      201.67      198.92      3.86 o
   4   1   7       20.38       19.77      1.92 o
   5   1   7        0.15       -0.56      2.17 o
   6   1   7        3.35        0.71      2.32 o
   7   1   7        8.92       16.52      6.05 o
  -9   2   7        0.06        1.34      4.60 o
  -8   2   7       10.11       17.48      4.42 o
  -7   2   7       33.27       35.68      3.17 o
  -6   2   7        5.69        4.98      1.73 o
  -5   2   7       10.08        9.78      1.89 o
  -4   2   7       41.72       35.30      2.51 o
  -3   2   7        9.32        7.30      1.52 o
  -2   2   7       69.62       68.40      2.96 o
  -1   2   7       83.16       98.88      2.18 o
   0   2   7        0.16       -0.68      0.90 o
   1   2   7      114.88      120.13      2.76 o
   2   2   7       49.81       53.36      2.11 o
   3   2   7       15.51       17.68      1.52 o
   4   2   7        2.22        1.63      1.60 o
   5   2   7        0.01        1.24      2.29 o
   6   2   7        0.58        0.46      5.26 o
  -9   3   7       23.31       24.52      7.75 o
  -8   3   7        0.85        2.15      2.07 o
  -7   3   7       36.77       35.04      2.93 o
  -6   3   7       60.93       60.32      3.25 o
  -5   3   7       85.20       77.94      3.88 o
  -4   3   7        2.45        0.85      1.29 o
  -3   3   7        1.27        3.80      1.41 o
  -2   3   7       23.01       23.29      2.08 o
  -1   3   7      287.82      310.87      5.79 o
   0   3   7       14.18       12.03      1.58 o
   1   3   7       27.85       29.17      1.57 o
   2   3   7        1.52        1.34      1.23 o
   3   3   7       13.84       13.20      2.03 o
   4   3   7        6.56        9.50      2.58 o
   5   3   7        8.23       12.42      3.01 o
   6   3   7        0.09       -4.22      5.04 o
  -8   4   7        1.11        2.05      2.19 o
  -7   4   7        9.14        8.03      2.05 o
  -6   4   7       38.79       40.11      2.86 o
  -5   4   7      107.34      108.18      3.89 o
  -4   4   7       62.62       62.16      2.78 o
  -3   4   7       11.28       10.08      1.13 o
  -2   4   7       35.49       35.76      2.61 o
  -1   4   7       17.38       20.99      2.05 o
   0   4   7        2.26        1.39      1.13 o
   1   4   7      112.39      116.42      3.32 o
   2   4   7        0.91       -0.38      1.32 o
   3   4   7       22.06       18.41      2.91 o
   4   4   7       19.39       16.99      5.67 o
   5   4   7       27.19       31.70      5.60 o
  -8   5   7        1.73        0.66      2.45 o
  -7   5   7        1.02       -1.37      1.67 o
  -6   5   7        3.80        2.41      1.91 o
  -5   5   7       59.32       52.11      3.64 o
  -4   5   7        5.77        6.51      1.87 o
  -3   5   7       20.55       23.06      2.47 o
  -2   5   7        0.96        0.86      1.32 o
  -1   5   7        6.74        9.77      1.78 o
   0   5   7       62.17       62.53      4.14 o
   1   5   7        0.00       -0.66      1.40 o
   2   5   7       14.16       10.98      3.60 o
   3   5   7       36.05       34.54      5.10 o
   4   5   7        9.73        8.13      4.05 o
  -8   6   7        2.55        1.08      2.72 o
  -7   6   7       12.85       16.88      3.54 o
  -6   6   7      103.50      113.57      5.59 o
  -5   6   7       12.14        9.71      2.27 o
  -4   6   7       64.05       56.50      3.88 o
  -3   6   7       18.27       15.96      2.46 o
  -2   6   7       61.89       64.75      3.70 o
  -1   6   7        5.79        6.35      2.35 o
   0   6   7       15.56       10.24      2.75 o
   1   6   7       14.46       11.72      3.91 o
   2   6   7        3.12       -1.66      2.94 o
   3   6   7        1.34        0.86      4.29 o
  -7   7   7        0.20       -1.87      2.37 o
  -6   7   7       19.02       20.98      3.76 o
  -5   7   7        0.18       -0.91      1.74 o
  -4   7   7       56.68       60.03      4.27 o
  -3   7   7       43.60       47.21      3.74 o
  -2   7   7       18.00       21.74      3.45 o
  -1   7   7       87.98       96.27      5.75 o
   0   7   7        1.84        3.63      2.61 o
   1   7   7       49.15       51.56      6.43 o
   2   7   7        7.58        4.52      4.18 o
  -6   8   7        1.13        1.29      2.74 o
  -5   8   7        0.03        0.10      2.37 o
  -4   8   7        2.43       -0.70      2.14 o
  -3   8   7        3.71        1.98      2.81 o
  -2   8   7       29.70       31.31      4.49 o
  -1   8   7        1.30       -2.60      3.11 o
   0   8   7       40.52       42.77      6.37 o
   1   8   7       32.54       30.30      9.92 o
   0  -9   8        4.55        5.49      3.73 o
   1  -9   8       50.16       52.69     11.81 o
   2  -9   8        3.47        6.50      2.97 o
   3  -9   8       23.65       27.12      4.08 o
   4  -9   8       32.83       29.54      5.33 o
  -2  -8   8        2.91        1.78      3.79 o
  -1  -8   8        0.93       -0.45      2.36 o
   0  -8   8       17.34       23.93      3.54 o
   1  -8   8        4.68        4.06      1.85 o
   2  -8   8        1.58        2.45      1.96 o
   3  -8   8       11.02       16.61      2.86 o
   4  -8   8        7.33        5.40      3.29 o
   5  -8   8        3.95        3.03      3.07 o
   6  -8   8        3.09        1.68      3.13 o
  -4  -7   8       88.50       96.12     12.27 o
  -3  -7   8        2.22        0.28      3.38 o
  -2  -7   8       75.50       85.56      5.69 o
  -1  -7   8       32.41       27.20      3.55 o
   0  -7   8       41.12       47.01      2.97 o
   1  -7   8        1.47        1.67      1.47 o
   2  -7   8        1.68        1.26      1.33 o
   3  -7   8        5.89        7.57      2.59 o
   4  -7   8        8.09        8.05      2.68 o
   5  -7   8        9.37        8.82      2.99 o
   6  -7   8        8.80       12.88      3.97 o
   7  -7   8        3.37        4.33      3.40 o
  -5  -6   8        0.02       -3.89      5.51 o
  -4  -6   8        0.00       -0.59      3.05 o
  -3  -6   8        4.74        2.96      2.50 o
  -2  -6   8        0.98       -1.39      1.83 o
  -1  -6   8       53.91       55.92      2.91 o
   0  -6   8        7.43        7.67      1.65 o
   1  -6   8      172.54      139.46     15.78 o
   2  -6   8       10.21       11.09      1.61 o
   3  -6   8      310.86      315.99      8.90 o
   4  -6   8       66.67       62.53      4.10 o
   5  -6   8       33.16       32.59      3.89 o
   6  -6   8       28.97       37.27      4.42 o
   7  -6   8        4.95        2.97      3.10 o
  -6  -5   8        0.05       -3.94      5.26 o
  -5  -5   8        0.16       -0.96      3.29 o
  -4  -5   8        0.00       -2.04      2.07 o
  -3  -5   8        0.92       -0.04      1.94 o
  -2  -5   8       11.43        9.01      2.05 o
  -1  -5   8       71.35       68.18      2.98 o
   0  -5   8      153.67      140.94      3.99 o
   1  -5   8      358.72      340.85      5.74 o
   2  -5   8      164.63      164.59      3.73 o
   3  -5   8       56.81       59.15      2.34 o
   4  -5   8        9.00        6.80      2.16 o
   5  -5   8        0.00        0.01      1.52 o
   6  -5   8       33.41       41.82      4.40 o
   7  -5   8       32.91       33.70      5.27 o
  -6  -4   8       26.02       27.79      4.12 o
  -5  -4   8       41.46       49.38      4.57 o
  -4  -4   8        0.29        0.31      1.93 o
  -3  -4   8       50.01       36.97      2.86 o
  -2  -4   8       79.83       75.87      2.99 o
  -1  -4   8       18.43       21.84      1.83 o
   0  -4   8       12.23       14.00      1.40 o
   1  -4   8        2.18        1.84      0.92 o
   2  -4   8      136.24      139.20      2.88 o
   3  -4   8        0.16       -0.25      1.03 o
   4  -4   8        9.36        8.07      1.94 o
   5  -4   8      106.02      106.00      4.87 o
   6  -4   8        8.50       11.30      2.74 o
   7  -4   8        7.46        8.87      2.87 o
   8  -4   8       11.87       22.61      5.00 o
  -7  -3   8       14.98       15.94      3.78 o
  -6  -3   8        4.56        4.33      2.42 o
  -5  -3   8        1.99        1.58      2.22 o
  -4  -3   8      121.09      109.26      4.25 o
  -3  -3   8      296.75      298.13      7.15 o
  -2  -3   8        1.17       -0.72      0.85 o
  -1  -3   8       66.54       64.38      2.40 o
   0  -3   8        8.88        9.40      0.92 o
   1  -3   8        1.53        2.17      1.08 o
   2  -3   8       65.99       70.55      2.19 o
   3  -3   8       40.81       39.76      2.30 o
   4  -3   8        3.52        2.60      0.96 o
   5  -3   8       16.47       12.50      2.23 o
   6  -3   8       10.24       10.97      2.81 o
   7  -3   8        0.18        2.20      2.33 o
   8  -3   8        7.88        8.34      3.89 o
  -7  -2   8        0.00       -2.19      2.27 o
  -6  -2   8        0.00       -0.10      2.18 o
  -5  -2   8       78.62       82.99      4.75 o
  -4  -2   8      116.02      118.18      3.82 o
  -3  -2   8        5.83        5.59      0.89 o
  -2  -2   8       28.45       33.46      1.60 o
  -1  -2   8      147.19      143.57      3.67 o
   0  -2   8        1.02       -0.29      0.59 o
   1  -2   8       85.63       78.20      2.55 o
   2  -2   8      117.91      117.15      2.87 o
   3  -2   8       12.74       13.21      1.61 o
   4  -2   8       44.05       42.38      2.34 o
   5  -2   8        2.99        3.13      1.34 o
   6  -2   8        6.33        7.26      2.14 o
   7  -2   8        8.35        9.72      2.94 o
  -8  -1   8        5.33        6.16      3.13 o
  -7  -1   8        0.10        0.73      2.41 o
  -6  -1   8       20.33       14.60      2.96 o
  -5  -1   8       32.72       40.41      3.00 o
  -4  -1   8       93.69       98.05      3.70 o
  -3  -1   8      440.79      407.07     27.60 o
  -2  -1   8       23.12       21.20      1.57 o
  -1  -1   8      579.23      574.39     23.75 o
   0  -1   8      245.64      265.55      4.40 o
   1  -1   8      163.99      148.90      2.07 o
   2  -1   8        7.37        9.08      0.76 o
   3  -1   8        0.00        0.05      0.67 o
   4  -1   8       35.01       37.09      2.37 o
   5  -1   8       10.49       10.54      1.79 o
   6  -1   8       12.25       14.54      2.50 o
   7  -1   8        1.29        4.19      4.90 o
  -8   0   8       33.03       37.79      5.66 o
  -7   0   8        1.28        1.01      2.19 o
  -6   0   8        0.91        1.95      1.75 o
  -5   0   8      277.77      273.73      6.82 o
  -4   0   8        0.00       -1.14      1.14 o
  -3   0   8        6.08        8.34      1.43 o
  -2   0   8      245.49      222.01      3.91 o
  -1   0   8        2.15        2.34      0.92 o
   0   0   8        4.80        3.47      0.77 o
   1   0   8        0.02        0.01      0.51 o
   2   0   8      138.33      145.25      2.76 o
   3   0   8      159.89      152.82      4.80 o
   4   0   8      204.47      201.63      4.24 o
   5   0   8       28.70       26.58      2.39 o
   6   0   8        0.57        1.05      2.73 o
   7   0   8        2.10        8.08      5.20 o
  -8   1   8        6.33        6.15      3.41 o
  -7   1   8       24.99       29.61      3.09 o
  -6   1   8       29.75       24.41      2.33 o
  -5   1   8       16.59       17.05      1.98 o
  -4   1   8      225.89      223.83      4.85 o
  -3   1   8       53.23       44.11     10.34 o
  -2   1   8      582.58      625.45      8.00 o
  -1   1   8      728.52      702.19      7.93 o
   0   1   8      339.05      332.22      3.95 o
   1   1   8      229.15      232.54      3.66 o
   2   1   8       25.35       28.54      1.88 o
   3   1   8     1321.72     1310.78     14.58 o
   4   1   8       60.41       57.34      2.88 o
   5   1   8       50.77       49.77      4.34 o
   6   1   8        3.49        0.97      3.10 o
   7   1   8        3.29        9.78      5.70 o
  -8   2   8        0.03        0.96      2.88 o
  -7   2   8       28.69       24.80      2.85 o
  -6   2   8       11.43       14.59      2.28 o
  -5   2   8        5.58        4.36      1.67 o
  -4   2   8        0.75        3.09      1.50 o
  -3   2   8       42.57       49.75      2.86 o
  -2   2   8       60.14       59.25      2.93 o
  -1   2   8      124.67      132.94      2.86 o
   0   2   8       28.17       28.08      1.63 o
   1   2   8        4.79        3.71      1.29 o
   2   2   8       83.27       84.56      3.16 o
   3   2   8       35.50       24.99      5.02 o
   4   2   8       63.91       45.91     12.47 o
   5   2   8        2.36        1.95      2.60 o
   6   2   8        3.57       -1.14      6.45 o
  -8   3   8        5.97        2.75      2.62 o
  -7   3   8        0.75        0.79      1.58 o
  -6   3   8       51.08       51.47      3.58 o
  -5   3   8      232.97      232.22      6.35 o
  -4   3   8      138.04      136.77      4.75 o
  -3   3   8       10.21        7.64      1.71 o
  -2   3   8       47.89       52.21      2.95 o
  -1   3   8        4.20        4.52      1.42 o
   0   3   8      425.79      434.49      6.85 o
   1   3   8       19.15       18.29      1.55 o
   2   3   8       19.73       17.78      2.07 o
   3   3   8        0.01       -0.02      1.49 o
   4   3   8        2.03        4.32      2.33 o
   5   3   8        2.11        6.92      4.42 o
   6   3   8        0.01       -3.40      5.20 o
  -8   4   8       38.78       37.66      3.89 o
  -7   4   8        3.63        2.03      1.74 o
  -6   4   8       18.22       14.00      2.10 o
  -5   4   8       61.74       68.60      3.27 o
  -4   4   8        2.77        1.21      1.09 o
  -3   4   8       44.59       39.62      2.93 o
  -2   4   8      235.81      249.75      6.06 o
  -1   4   8      152.25      151.44      4.64 o
   0   4   8       85.53       87.95      4.32 o
   1   4   8       48.03       51.53      2.44 o
   2   4   8       15.14       14.71      2.71 o
   3   4   8        2.90       -0.57      2.75 o
   4   4   8        0.44        0.84      3.30 o
   5   4   8        2.24        4.39      7.31 o
  -8   5   8        2.71        2.03      2.51 o
  -7   5   8        0.75        0.72      1.92 o
  -6   5   8        1.72        1.90      1.87 o
  -5   5   8       42.94       37.73      3.34 o
  -4   5   8       74.27       73.17      4.04 o
  -3   5   8        3.14        2.48      1.58 o
  -2   5   8      189.10      192.41      5.66 o
  -1   5   8       41.90       46.94      3.07 o
   0   5   8        3.06        1.82      1.93 o
   1   5   8        2.22        2.43      1.77 o
   2   5   8        0.96       -0.65      3.86 o
   3   5   8        4.69        7.07      3.92 o
   4   5   8        9.09        7.26      4.36 o
  -7   6   8        0.38        0.08      2.33 o
  -6   6   8       24.67       26.99      3.46 o
  -5   6   8        8.56       10.51      2.48 o
  -4   6   8       34.62       34.24      3.31 o
  -3   6   8       88.07       88.64      4.52 o
  -2   6   8       14.09       18.05      2.49 o
  -1   6   8        8.35        9.63      2.72 o
   0   6   8        6.81        6.89      2.82 o
   1   6   8        4.12        6.33      3.44 o
   2   6   8        0.00       -0.04      3.26 o
   3   6   8        3.44       -3.18      4.73 o
  -7   7   8       14.69       18.14      4.11 o
  -6   7   8        8.41        5.18      2.86 o
  -5   7   8       23.66       24.23      3.87 o
  -4   7   8        2.45        1.28      1.91 o
  -3   7   8       25.14       25.11      3.12 o
  -2   7   8       19.88       16.84      3.50 o
  -1   7   8       32.85       31.15      4.11 o
   0   7   8       12.40       13.65      3.58 o
   1   7   8        3.28       -1.66      3.04 o
   2   7   8        7.03        3.78      5.45 o
  -5   8   8        3.20        0.37      2.54 o
  -4   8   8        9.34        9.00      3.04 o
  -3   8   8        9.61       10.76      3.55 o
  -2   8   8       10.89        6.13      3.20 o
  -1   8   8       15.27       13.04      4.83 o
   0   8   8       10.80        6.47      5.83 o
   0  -9   9        7.93        5.27      3.93 o
   1  -9   9       37.35       45.68      8.57 o
   2  -9   9       27.79       24.46     12.19 o
   3  -9   9        3.82       -1.00      2.67 o
   4  -9   9       26.44       29.91      4.40 o
  -2  -8   9        0.13       -1.75      5.31 o
  -1  -8   9       25.81       30.33      4.26 o
   0  -8   9       47.61       60.62      4.98 o
   1  -8   9        0.00       -0.80      1.89 o
   2  -8   9        9.42       14.03      2.71 o
   3  -8   9       20.73       28.71      3.91 o
   4  -8   9        1.95        2.59      2.93 o
   5  -8   9        1.41        3.61      3.44 o
  -4  -7   9        0.91        5.45      6.66 o
  -3  -7   9       32.54       34.78      8.35 o
  -2  -7   9        3.69        3.53      2.76 o
  -1  -7   9       23.26       23.47      3.49 o
   0  -7   9        0.00        0.50      1.52 o
   1  -7   9       29.55       31.72      2.69 o
   2  -7   9       41.32       41.35      3.41 o
   3  -7   9       31.10       28.61      3.24 o
   4  -7   9        0.28        1.45      2.17 o
   5  -7   9       17.88       18.59      4.36 o
   6  -7   9        0.12        0.72      2.82 o
  -5  -6   9       14.42       11.89      7.62 o
  -4  -6   9        0.14       -2.16      2.32 o
  -3  -6   9        4.01        2.14      2.66 o
  -2  -6   9        5.46        6.99      2.66 o
  -1  -6   9        2.03       -0.26      1.58 o
   0  -6   9      114.11      110.31      3.94 o
   1  -6   9       52.77       43.73      4.37 o
   2  -6   9        9.68        7.46      2.02 o
   3  -6   9       59.25       57.20      3.89 o
   4  -6   9        5.50        5.69      2.14 o
   5  -6   9       85.58       83.69      5.74 o
   6  -6   9        7.76        5.69      3.40 o
   7  -6   9        0.02        1.63      3.03 o
  -6  -5   9        0.57       -4.96      4.96 o
  -5  -5   9        0.48       -1.66      2.36 o
  -4  -5   9        7.18       12.72      3.08 o
  -3  -5   9       21.49       19.30      3.23 o
  -2  -5   9       27.25       21.83      2.64 o
  -1  -5   9        0.04       -0.05      1.22 o
   0  -5   9      258.03      243.90      5.18 o
   1  -5   9       81.71       85.06      3.29 o
   2  -5   9      110.74      109.14      3.10 o
   3  -5   9       13.08       14.45      2.16 o
   4  -5   9       34.70       31.69      3.08 o
   5  -5   9       60.25       55.91      4.74 o
   6  -5   9        3.48        6.18      2.65 o
   7  -5   9       57.46       55.63      6.62 o
  -6  -4   9        9.03       15.54      3.72 o
  -5  -4   9       32.81       41.05      4.33 o
  -4  -4   9       33.21       26.56      3.56 o
  -3  -4   9       11.14        5.65      1.96 o
  -2  -4   9       50.97       56.69      2.63 o
  -1  -4   9      293.28      284.14      6.05 o
   0  -4   9       26.64       24.83      1.72 o
   1  -4   9       72.00       77.45      2.27 o
   2  -4   9       53.62       50.20      3.12 o
   3  -4   9        1.00        1.09      1.41 o
   4  -4   9        4.05        3.34      1.86 o
   5  -4   9        1.00       -0.66      1.49 o
   6  -4   9        0.81        1.68      2.31 o
   7  -4   9        0.01        0.62      2.41 o
  -7  -3   9        0.04       -1.78      2.64 o
  -6  -3   9        0.06        1.69      2.43 o
  -5  -3   9        3.83        2.69      2.40 o
  -4  -3   9       10.25       12.01      2.18 o
  -3  -3   9        0.35       -0.31      1.38 o
  -2  -3   9      498.19      513.69      8.54 o
  -1  -3   9       31.47       27.76      2.00 o
   0  -3   9       27.69       25.78      1.59 o
   1  -3   9       12.06        7.41      1.77 o
   2  -3   9      159.32      151.86      4.14 o
   3  -3   9       19.71       18.25      1.88 o
   4  -3   9       34.53       36.27      3.02 o
   5  -3   9        2.95        2.06      1.67 o
   6  -3   9        0.15        3.87      2.32 o
   7  -3   9       12.39       13.12      3.43 o
  -7  -2   9       18.50       17.94      3.74 o
  -6  -2   9        2.73        0.76      2.31 o
  -5  -2   9        5.55        4.59      1.90 o
  -4  -2   9      493.44      456.30      9.98 o
  -3  -2   9       33.71       38.63      2.25 o
  -2  -2   9       14.68       13.87      1.72 o
  -1  -2   9       93.80      101.34      2.78 o
   0  -2   9       46.33       51.41      1.70 o
   1  -2   9       92.63       86.16      3.12 o
   2  -2   9      238.06      240.06      6.30 o
   3  -2   9       21.23       23.05      1.86 o
   4  -2   9       49.44       52.16      3.37 o
   5  -2   9       73.69       67.21      3.98 o
   6  -2   9        8.75        7.70      2.67 o
   7  -2   9        5.62       10.43      3.17 o
  -8  -1   9        8.41        4.54      3.32 o
  -7  -1   9       35.44       36.74      5.20 o
  -6  -1   9       36.11       40.21      4.14 o
  -5  -1   9        1.04        1.17      1.58 o
  -4  -1   9      102.69       98.39      3.41 o
  -3  -1   9       61.27       57.44      2.78 o
  -2  -1   9       44.36       47.55      2.42 o
  -1  -1   9      196.96      188.61      4.14 o
   0  -1   9       53.29       49.95      1.81 o
   1  -1   9        0.03       -0.35      0.54 o
   2  -1   9        0.32        0.13      0.59 o
   3  -1   9      110.27      108.74      2.68 o
   4  -1   9       21.58       17.30      1.75 o
   5  -1   9       12.74       14.15      2.34 o
   6  -1   9        2.79        3.20      2.30 o
   7  -1   9       46.48       64.43      9.72 o
  -8   0   9        0.18       -1.33      2.44 o
  -7   0   9       15.02       19.22      3.45 o
  -6   0   9       57.67       53.07      3.68 o
  -5   0   9      222.79      206.61      4.95 o
  -4   0   9        0.69        1.28      1.39 o
  -3   0   9        5.33        7.49      1.53 o
  -2   0   9      100.38      104.22      3.70 o
  -1   0   9       15.26       12.65      1.24 o
   0   0   9       86.83       83.71      2.32 o
   1   0   9       26.32       20.11      1.22 o
   2   0   9       98.43      100.19      3.16 o
   3   0   9       17.58       17.71      1.82 o
   4   0   9        3.28        1.90      1.36 o
   5   0   9       35.15       39.41      2.76 o
   6   0   9        6.83       10.14      5.26 o
   7   0   9       17.47       22.30      6.85 o
  -8   1   9        4.20        6.80      5.41 o
  -7   1   9        1.07        1.41      1.86 o
  -6   1   9       43.97       43.06      2.88 o
  -5   1   9        1.58       -0.34      1.31 o
  -4   1   9       21.60       20.63      2.04 o
  -3   1   9        1.56        1.69      1.32 o
  -2   1   9       10.81        8.59      1.63 o
  -1   1   9       72.59       76.19      2.63 o
   0   1   9      730.13      708.24     11.20 o
   1   1   9        0.19       -0.01      0.77 o
   2   1   9        0.62        0.70      1.06 o
   3   1   9      159.88      151.80      4.11 o
   4   1   9       95.13       91.18      4.20 o
   5   1   9        9.83       10.83      2.88 o
   6   1   9        1.52        9.56      5.42 o
  -8   2   9        6.95        7.91      3.47 o
  -7   2   9        5.73        6.35      2.24 o
  -6   2   9       74.44       75.68      4.12 o
  -5   2   9       51.97       43.83      3.16 o
  -4   2   9      168.42      159.68      5.07 o
  -3   2   9       65.84       64.86      3.38 o
  -2   2   9       30.65       27.45      2.35 o
  -1   2   9       26.28       28.99      1.68 o
   0   2   9        0.02        0.36      0.85 o
   1   2   9       89.06       95.90      3.09 o
   2   2   9       57.14       56.28      2.61 o
   3   2   9      167.01      158.77      5.02 o
   4   2   9        6.02        4.51      2.00 o
   5   2   9        8.63        7.80      2.84 o
   6   2   9        0.69        4.33      5.23 o
  -8   3   9        8.44        5.78      2.79 o
  -7   3   9        2.24        2.34      1.96 o
  -6   3   9       75.91       69.46      4.15 o
  -5   3   9        0.24        0.64      1.56 o
  -4   3   9       69.60       68.61      3.74 o
  -3   3   9       22.19       20.63      2.32 o
  -2   3   9       11.76        9.78      1.84 o
  -1   3   9        2.53        1.81      1.37 o
   0   3   9       38.41       40.06      2.72 o
   1   3   9        0.01       -0.48      0.89 o
   2   3   9        2.76        1.98      1.41 o
   3   3   9       15.83       18.07      2.40 o
   4   3   9        0.04        0.11      2.97 o
   5   3   9        2.61        3.16      3.68 o
  -8   4   9       18.10       16.27      5.84 o
  -7   4   9        0.12        0.69      1.86 o
  -6   4   9       10.12        6.14      2.12 o
  -5   4   9        0.55       -0.06      1.52 o
  -4   4   9      149.22      135.51      6.04 o
  -3   4   9        4.98        5.83      1.76 o
  -2   4   9       18.18       22.33      2.42 o
  -1   4   9       20.30       25.70      2.45 o
   0   4   9       19.48       16.34      2.08 o
   1   4   9        0.06       -0.08      1.46 o
   2   4   9       42.12       41.38      3.85 o
   3   4   9        0.36       -0.59      3.01 o
   4   4   9        0.84       -0.67      3.33 o
   5   4   9        3.72       -1.48      3.91 o
  -8   5   9        2.86        6.12      3.04 o
  -7   5   9        0.29       -0.04      2.21 o
  -6   5   9        4.21        1.33      1.91 o
  -5   5   9       24.35       20.18      2.79 o
  -4   5   9      190.05      190.00      6.30 o
  -3   5   9        3.94        1.01      1.61 o
  -2   5   9        0.03        0.08      1.35 o
  -1   5   9       15.86       16.81      2.24 o
   0   5   9        8.23       10.43      3.19 o
   1   5   9       36.92       40.77      3.47 o
   2   5   9        8.18        4.66      3.28 o
   3   5   9        3.01        3.98      3.66 o
   4   5   9        0.08        0.74      3.96 o
  -7   6   9        0.18       -0.89      2.45 o
  -6   6   9        0.04       -0.86      2.07 o
  -5   6   9        2.13        4.16      2.18 o
  -4   6   9        2.50        2.45      1.83 o
  -3   6   9      184.37      197.36      6.56 o
  -2   6   9       20.43       22.48      2.75 o
  -1   6   9       32.27       30.42      3.90 o
   0   6   9        0.21       -0.22      2.13 o
   1   6   9        0.37       -1.94      3.10 o
   2   6   9       29.37       34.23      5.77 o
   3   6   9        0.59       -3.55      3.72 o
  -6   7   9       26.26       33.11      4.58 o
  -5   7   9        2.61        2.76      2.46 o
  -4   7   9        0.55       -1.42      1.80 o
  -3   7   9       10.03        7.06      2.39 o
  -2   7   9       39.45       43.57      4.64 o
  -1   7   9        0.67        1.41      2.51 o
   0   7   9       17.85       19.42      3.97 o
   1   7   9        0.03        1.01      3.82 o
  -5   8   9        9.79       12.13      4.50 o
  -4   8   9       11.17       12.33      4.67 o
  -3   8   9        0.43       -1.61      3.13 o
  -2   8   9        4.24        0.33      2.99 o
  -1   8   9       21.18       14.62      5.23 o
   1  -9  10        9.65        7.37      4.09 o
   2  -9  10       22.44       13.96     12.64 o
   3  -9  10        0.21        0.51      3.19 o
  -2  -8  10        5.30        3.42      6.16 o
  -1  -8  10        2.10        3.58      3.55 o
   0  -8  10       14.24       20.24      4.64 o
   1  -8  10       29.88       42.82      5.89 o
   2  -8  10        3.50        4.88      2.56 o
   3  -8  10        0.09        1.38      2.76 o
   4  -8  10        2.88        5.94      2.95 o
   5  -8  10        0.60       -0.43      3.04 o
  -3  -7  10       70.27       85.29      7.55 o
  -2  -7  10       70.99       84.80      6.84 o
  -1  -7  10       15.22       15.99      3.92 o
   0  -7  10        0.00       -0.69      1.84 o
   1  -7  10       12.17       14.44      2.59 o
   2  -7  10        4.25        6.69      2.18 o
   3  -7  10        2.10        2.82      2.02 o
   4  -7  10        1.33        3.43      2.41 o
   5  -7  10       30.60       24.33      4.83 o
   6  -7  10        4.31        5.65      3.77 o
  -4  -6  10        1.11       -0.11      2.71 o
  -3  -6  10       57.46       68.81      5.41 o
  -2  -6  10       56.70       57.30      4.69 o
  -1  -6  10        0.01       -0.20      1.81 o
   0  -6  10       66.53       58.85      3.20 o
   1  -6  10      115.39       93.78     11.58 o
   2  -6  10       11.36       11.15      2.24 o
   3  -6  10        9.56        6.22      2.16 o
   4  -6  10        0.13        0.05      2.01 o
   5  -6  10       68.47       71.05      5.54 o
   6  -6  10       52.58       49.20      6.27 o
  -5  -5  10        0.64       -2.27      2.60 o
  -4  -5  10        9.56        6.72      2.85 o
  -3  -5  10       26.65       31.46      3.84 o
  -2  -5  10        2.41        5.01      2.13 o
  -1  -5  10       67.18       55.00      2.93 o
   0  -5  10        0.90        1.13      1.39 o
   1  -5  10      125.62      122.88      3.77 o
   2  -5  10        0.72       -0.48      1.46 o
   3  -5  10        2.37        1.13      1.45 o
   4  -5  10      135.71      130.15      6.93 o
   5  -5  10        2.05        1.07      2.16 o
   6  -5  10        0.01       -0.33      2.62 o
   7  -5  10        0.85        0.85      3.23 o
  -6  -4  10       21.54       27.82      4.39 o
  -5  -4  10       13.34        9.47      3.15 o
  -4  -4  10       24.64       26.98      3.91 o
  -3  -4  10       40.12       48.45      3.43 o
  -2  -4  10      180.40      183.22      4.93 o
  -1  -4  10      102.36       95.84      3.52 o
   0  -4  10      238.23      236.28      4.86 o
   1  -4  10        0.45        0.76      1.14 o
   2  -4  10       17.36       18.26      2.34 o
   3  -4  10       17.88       15.05      2.07 o
   4  -4  10       46.29       49.99      3.63 o
   5  -4  10        2.52        4.64      2.32 o
   6  -4  10        9.78       16.53      3.87 o
   7  -4  10        1.33        2.34      3.06 o
  -7  -3  10       58.89       65.83      5.98 o
  -6  -3  10        7.46       10.90      3.34 o
  -5  -3  10        0.87        1.30      2.38 o
  -4  -3  10       48.49       52.88      3.55 o
  -3  -3  10       19.92       13.41      2.29 o
  -2  -3  10       50.31       51.58      2.67 o
  -1  -3  10       12.50       10.96      1.73 o
   0  -3  10       26.30       23.76      3.60 o
   1  -3  10       11.86       10.13      1.94 o
   2  -3  10       57.35       55.62      4.04 o
   3  -3  10       38.52       36.12      2.65 o
   4  -3  10        2.52        6.42      1.90 o
   5  -3  10       12.45       17.49      2.74 o
   6  -3  10        4.61        3.40      2.49 o
   7  -3  10        7.86       10.82      3.39 o
  -7  -2  10       50.51       61.09      5.56 o
  -6  -2  10       21.62       23.02      3.71 o
  -5  -2  10        7.08        3.71      1.98 o
  -4  -2  10        5.24        5.96      2.00 o
  -3  -2  10       51.05       52.04      2.71 o
  -2  -2  10      328.04      322.97      7.07 o
  -1  -2  10      530.03      526.58      9.87 o
   0  -2  10      538.35      538.06      9.95 o
   1  -2  10       29.80       24.96      2.42 o
   2  -2  10        9.72       11.00      1.95 o
   3  -2  10       27.21       25.58      2.61 o
   4  -2  10        9.98        9.26      1.81 o
   5  -2  10        3.64        5.13      2.01 o
   6  -2  10        9.35       10.07      2.93 o
   7  -2  10        8.59        9.20      5.64 o
  -8  -1  10        2.44        1.95      3.68 o
  -7  -1  10        1.17        1.77      2.58 o
  -6  -1  10       14.65       19.57      3.43 o
  -5  -1  10        4.85        7.83      2.09 o
  -4  -1  10        1.13        0.44      1.41 o
  -3  -1  10        0.06       -0.55      1.32 o
  -2  -1  10        3.66        4.11      1.47 o
  -1  -1  10      244.22      255.64      3.92 o
   0  -1  10      262.22      268.81      3.86 o
   1  -1  10      157.03      160.42      3.40 o
   2  -1  10       33.53       34.68      1.71 o
   3  -1  10        2.25        2.00      1.21 o
   4  -1  10       15.96       13.68      2.21 o
   5  -1  10        7.94        5.52      1.74 o
   6  -1  10        5.61        4.73      3.68 o
   7  -1  10        3.04        6.85      5.56 o
  -8   0  10        0.85       -0.02      2.74 o
  -7   0  10        0.02       -1.32      2.23 o
  -6   0  10        4.86        3.27      2.02 o
  -5   0  10      119.41      106.59      3.92 o
  -4   0  10       25.19       21.93      2.21 o
  -3   0  10        0.00        1.75      1.40 o
  -2   0  10       51.37       47.28      4.95 o
  -1   0  10      114.77      116.57      3.34 o
   0   0  10        5.44        5.68      1.05 o
   1   0  10       73.14       68.50      2.09 o
   2   0  10        0.94        0.45      0.82 o
   3   0  10        9.78       10.42      1.69 o
   4   0  10        5.31        5.26      1.60 o
   5   0  10        0.32       -1.58      2.22 o
   6   0  10        1.00        4.90      4.90 o
  -8   1  10        9.18       19.10      4.84 o
  -7   1  10        0.01        0.87      1.97 o
  -6   1  10       27.53       32.18      2.77 o
  -5   1  10      184.24      175.62      5.26 o
  -4   1  10      204.91      199.29      5.61 o
  -3   1  10        0.00       -0.58      1.33 o
  -2   1  10      321.10      320.00      6.40 o
  -1   1  10        5.16        7.41      1.30 o
   0   1  10       36.21       39.26      2.16 o
   1   1  10        2.12        1.41      0.91 o
   2   1  10       34.08       35.61      2.27 o
   3   1  10        0.35        0.30      1.28 o
   4   1  10       56.42       44.33      3.33 o
   5   1  10        4.57        2.87      3.01 o
   6   1  10        1.08        0.14      4.38 o
  -8   2  10        2.39        3.91      3.31 o
  -7   2  10       13.16       13.54      3.24 o
  -6   2  10       13.28       12.10      2.39 o
  -5   2  10       14.49       13.95      2.31 o
  -4   2  10       72.88       78.03      3.95 o
  -3   2  10        1.55        0.74      1.45 o
  -2   2  10        0.88        0.34      0.88 o
  -1   2  10       73.21       72.15      2.58 o
   0   2  10       30.81       29.35      1.94 o
   1   2  10        9.04        8.70      1.43 o
   2   2  10        2.36        3.20      1.35 o
   3   2  10       55.09       51.17      3.38 o
   4   2  10       31.53       31.27      3.16 o
   5   2  10        0.12       -3.03      3.03 o
   6   2  10        0.62        4.11      5.12 o
  -8   3  10       21.56       26.65      4.34 o
  -7   3  10        5.66        5.29      2.26 o
  -6   3  10       60.64       63.26      4.17 o
  -5   3  10       29.55       24.43      2.81 o
  -4   3  10      102.28       98.58      4.53 o
  -3   3  10        3.20        1.28      1.47 o
  -2   3  10        1.45        0.97      1.44 o
  -1   3  10        3.70        4.04      1.59 o
   0   3  10        0.23       -1.07      1.23 o
   1   3  10       10.49       10.57      1.45 o
   2   3  10        7.61        4.05      2.33 o
   3   3  10        0.77       -1.17      2.14 o
   4   3  10        3.81       -0.85      2.57 o
   5   3  10        0.34       -0.71      4.33 o
  -8   4  10        0.86        0.07      2.42 o
  -7   4  10        7.27        6.03      2.38 o
  -6   4  10        1.32        0.24      1.78 o
  -5   4  10       53.16       55.10      3.88 o
  -4   4  10       95.24      100.74      4.69 o
  -3   4  10       20.91       22.10      2.61 o
  -2   4  10        6.13        6.60      1.87 o
  -1   4  10       64.37       69.43      3.71 o
   0   4  10        3.38        1.90      1.47 o
   1   4  10       18.14       15.57      2.48 o
   2   4  10        1.96        0.86      2.28 o
   3   4  10        1.27        2.42      3.18 o
   4   4  10        1.23       -0.65      3.53 o
  -7   5  10        0.29        0.98      2.38 o
  -6   5  10       19.45       17.66      3.02 o
  -5   5  10       19.76       25.96      3.21 o
  -4   5  10       71.79       72.50      4.32 o
  -3   5  10        0.22        1.09      1.56 o
  -2   5  10       25.16       21.88      2.66 o
  -1   5  10       34.63       31.79      2.85 o
   0   5  10       69.77       61.98      4.80 o
   1   5  10       22.00       24.75      3.16 o
   2   5  10        1.31       -0.18      3.02 o
   3   5  10        0.01        0.30      3.83 o
  -7   6  10        1.92        0.12      2.48 o
  -6   6  10        0.37        0.63      2.14 o
  -5   6  10        2.06        1.44      1.93 o
  -4   6  10        6.69        9.15      2.51 o
  -3   6  10        0.07       -0.01      1.84 o
  -2   6  10       33.63       37.14      4.29 o
  -1   6  10        6.47        1.81      2.58 o
   0   6  10       14.47       13.17      3.43 o
   1   6  10        0.78       -0.07      3.25 o
   2   6  10        3.24        0.00      7.93 o
  -6   7  10        2.02        1.18      2.77 o
  -5   7  10        5.86        4.67      2.84 o
  -4   7  10        7.95        7.09      2.86 o
  -3   7  10        7.16        3.59      3.06 o
  -2   7  10        1.64        1.73      2.74 o
  -1   7  10        0.39        1.45      2.68 o
   0   7  10        4.57       10.81      3.64 o
   1   7  10        2.84        1.72      5.05 o
  -4   8  10       13.64       18.63      8.08 o
  -3   8  10        0.63       -4.99      5.89 o
  -2   8  10       10.09       -5.40      6.14 o
  -1  -8  11        4.69       -0.22      6.38 o
   0  -8  11        5.48        5.43      3.84 o
   1  -8  11        7.89       13.49      3.51 o
   2  -8  11        3.45        5.52      2.77 o
   3  -8  11       27.55       30.80      5.20 o
   4  -8  11        5.01        4.67      3.03 o
  -3  -7  11       10.38       15.89      4.94 o
  -2  -7  11       11.72        9.32      3.40 o
  -1  -7  11        0.16       -2.07      3.31 o
   0  -7  11        1.29        0.34      2.52 o
   1  -7  11       15.22       14.29      2.69 o
   2  -7  11        0.08        0.33      1.91 o
   3  -7  11        0.77       -0.22      2.19 o
   4  -7  11        6.81        6.09      2.77 o
   5  -7  11       25.58       26.81      5.18 o
  -4  -6  11        3.89        2.54      3.77 o
  -3  -6  11        3.23        2.42      2.69 o
  -2  -6  11       31.74       33.07      4.06 o
  -1  -6  11       52.74       62.13      4.03 o
   0  -6  11        2.13        2.26      1.81 o
   1  -6  11        2.81        1.72      1.57 o
   2  -6  11      184.48      178.91      6.09 o
   3  -6  11       10.05       10.42      2.87 o
   4  -6  11       72.48       74.92      4.81 o
   5  -6  11        6.55        8.53      3.55 o
   6  -6  11       16.57       17.10      4.65 o
  -5  -5  11       15.17        9.98      4.50 o
  -4  -5  11        2.97        0.10      2.48 o
  -3  -5  11       16.34       15.95      3.31 o
  -2  -5  11       60.40       46.03      3.58 o
  -1  -5  11       40.29       42.20      2.78 o
   0  -5  11      140.96      138.99      4.25 o
   1  -5  11      192.18      174.51      5.70 o
   2  -5  11      110.30      110.12      4.75 o
   3  -5  11      309.67      302.73      7.35 o
   4  -5  11        1.68        2.39      1.98 o
   5  -5  11       43.89       51.64      5.30 o
   6  -5  11        2.40        3.08      3.09 o
  -6  -4  11        0.80       -0.55      3.33 o
  -5  -4  11       14.58       20.91      3.81 o
  -4  -4  11        0.03       -0.69      2.31 o
  -3  -4  11        4.11        7.08      2.22 o
  -2  -4  11        9.69        8.03      1.63 o
  -1  -4  11      355.52      345.06     12.43 o
   0  -4  11       66.15       66.13      3.05 o
   1  -4  11        6.68        3.23      1.82 o
   2  -4  11       19.85       19.62      2.46 o
   3  -4  11       45.06       42.49      3.38 o
   4  -4  11        4.80        3.88      1.61 o
   5  -4  11        1.58       -0.48      2.01 o
   6  -4  11       12.43       10.57      3.20 o
   7  -4  11        0.00        4.29      3.56 o
  -6  -3  11        0.99        1.26      2.67 o
  -5  -3  11        5.89        8.72      2.91 o
  -4  -3  11        1.59        3.72      2.05 o
  -3  -3  11       91.88       75.52      4.13 o
  -2  -3  11      256.71      247.81      5.24 o
  -1  -3  11       10.97       10.62      1.84 o
   0  -3  11      183.67      181.51      5.67 o
   1  -3  11        0.76        2.46      1.69 o
   2  -3  11        3.75        2.45      2.07 o
   3  -3  11       10.49       11.01      2.17 o
   4  -3  11        9.48       11.18      2.07 o
   5  -3  11       12.13       13.85      2.64 o
   6  -3  11        0.02        0.40      2.29 o
   7  -3  11        3.70        2.80      4.63 o
  -7  -2  11        9.62       18.80      4.10 o
  -6  -2  11        1.54        1.33      2.49 o
  -5  -2  11       13.79       13.47      2.57 o
  -4  -2  11       10.19       12.03      2.32 o
  -3  -2  11       27.45       22.44      2.16 o
  -2  -2  11      137.27      143.48      4.14 o
  -1  -2  11       19.98       18.95      1.93 o
   0  -2  11        0.23       -0.50      0.86 o
   1  -2  11        0.22       -0.07      1.90 o
   2  -2  11       10.89        8.04      1.99 o
   3  -2  11       60.37       52.82      3.53 o
   4  -2  11        1.01        1.28      1.60 o
   5  -2  11        2.99        2.06      1.66 o
   6  -2  11        4.71        5.11      2.34 o
   7  -2  11        1.41       -0.05      4.38 o
  -7  -1  11       19.82       22.40      4.06 o
  -6  -1  11       25.14       30.96      4.02 o
  -5  -1  11       35.45       29.35      3.00 o
  -4  -1  11      120.16      118.68      4.00 o
  -3  -1  11        5.23        3.82      1.61 o
  -2  -1  11      104.27      103.43      3.69 o
  -1  -1  11        2.42        2.09      1.16 o
   0  -1  11      143.79      159.20      4.42 o
   1  -1  11        3.93        3.35      1.20 o
   2  -1  11       49.83       48.86      3.23 o
   3  -1  11       54.49       54.31      3.47 o
   4  -1  11       12.03        9.82      2.18 o
   5  -1  11       14.70       16.19      2.71 o
   6  -1  11       15.66       12.86      4.43 o
  -8   0  11        2.00        2.22      3.87 o
  -7   0  11       12.99       10.23      3.29 o
  -6   0  11        2.75        2.94      1.99 o
  -5   0  11       11.43       11.05      2.05 o
  -4   0  11      173.10      168.98      4.78 o
  -3   0  11       51.61       50.35      2.89 o
  -2   0  11        1.81        0.67      1.50 o
  -1   0  11        2.93        4.28      1.24 o
   0   0  11       55.65       54.44      2.25 o
   1   0  11        0.36        0.03      0.90 o
   2   0  11        1.71        0.43      0.97 o
   3   0  11        1.10       -0.02      1.21 o
   4   0  11       17.76       19.53      2.93 o
   5   0  11        4.58        2.80      2.72 o
   6   0  11       23.22       26.98      7.48 o
  -8   1  11       13.93       18.22      3.96 o
  -7   1  11        8.18        6.50      2.43 o
  -6   1  11       24.61       26.27      3.08 o
  -5   1  11       47.25       43.13      3.34 o
  -4   1  11        2.05        2.14      1.72 o
  -3   1  11      250.88      248.94      6.25 o
  -2   1  11       45.65       50.17      3.10 o
  -1   1  11      172.14      183.44      4.68 o
   0   1  11      104.65      111.07      4.26 o
   1   1  11        4.11        3.24      1.34 o
   2   1  11       13.51       13.47      1.55 o
   3   1  11        0.53        0.72      1.32 o
   4   1  11      175.12      177.42      7.14 o
   5   1  11       31.24       28.50      4.78 o
   6   1  11        5.15        7.51      5.83 o
  -8   2  11        0.10       -1.23      2.64 o
  -7   2  11        1.93        0.26      2.24 o
  -6   2  11        0.04       -0.47      1.72 o
  -5   2  11        5.99        3.30      1.85 o
  -4   2  11        0.71        1.83      1.61 o
  -3   2  11       22.42       20.13      2.48 o
  -2   2  11      105.94      117.33      3.55 o
  -1   2  11      102.31       93.95      3.12 o
   0   2  11        2.87        0.75      1.11 o
   1   2  11        1.06        1.51      1.55 o
   2   2  11       10.69        6.69      1.54 o
   3   2  11       41.13       35.52      3.10 o
   4   2  11       29.41       18.22      4.22 o
   5   2  11        0.30        0.58      5.37 o
  -8   3  11       14.53       25.23      5.35 o
  -7   3  11        0.17        0.83      2.05 o
  -6   3  11       11.80       15.07      2.80 o
  -5   3  11        1.42       -0.11      1.69 o
  -4   3  11       56.77       51.73      3.61 o
  -3   3  11      130.95      132.29      5.03 o
  -2   3  11        9.76       13.29      2.19 o
  -1   3  11       15.85       17.67      2.30 o
   0   3  11       10.95       11.55      2.06 o
   1   3  11        6.08        8.74      2.44 o
   2   3  11       15.35       10.82      3.63 o
   3   3  11        3.48        3.08      2.63 o
   4   3  11        0.16       -0.56      3.27 o
   5   3  11        0.01        7.62      6.14 o
  -8   4  11        3.30        7.56      5.07 o
  -7   4  11       37.18       37.58      4.56 o
  -6   4  11       42.23       35.08      3.65 o
  -5   4  11        0.21       -0.82      1.62 o
  -4   4  11        3.12        1.77      1.75 o
  -3   4  11       70.05       74.04      4.13 o
  -2   4  11        2.05        0.28      1.53 o
  -1   4  11       43.52       48.93      3.39 o
   0   4  11       32.70       32.09      3.69 o
   1   4  11       30.13       24.52      2.95 o
   2   4  11        1.50        2.02      2.54 o
   3   4  11        0.03       -3.12      3.12 o
   4   4  11        0.17        2.51      4.05 o
  -7   5  11        2.70        1.88      2.52 o
  -6   5  11        0.74        0.29      2.26 o
  -5   5  11       26.62       27.26      3.35 o
  -4   5  11       45.55       45.89      3.79 o
  -3   5  11      129.58      141.42      5.67 o
  -2   5  11        6.24        6.85      2.17 o
  -1   5  11       45.45       45.99      4.84 o
   0   5  11        2.95       -0.54      2.30 o
   1   5  11        1.99        0.86      2.53 o
   2   5  11        8.44        5.59      3.99 o
   3   5  11        0.02       -0.89      3.77 o
  -6   6  11        1.03       -1.40      2.33 o
  -5   6  11        6.82        6.92      2.87 o
  -4   6  11       13.92       10.38      2.70 o
  -3   6  11       11.20       12.28      2.70 o
  -2   6  11       36.58       43.65      4.63 o
  -1   6  11        0.60       -2.39      2.39 o
   0   6  11        1.40       -0.21      2.74 o
   1   6  11        4.62        5.20      3.82 o
   2   6  11        0.40        1.13      4.04 o
  -5   7  11       15.77       16.09      3.80 o
  -4   7  11        4.91        1.13      2.73 o
  -3   7  11        3.90       -0.70      3.45 o
  -2   7  11       17.87       19.51      4.25 o
  -1   7  11        5.42       -0.50      3.40 o
   0   7  11        0.02        1.47      3.32 o
  -1  -8  12       77.85       86.18     11.42 o
   0  -8  12       18.58       14.99      4.70 o
   1  -8  12       27.92       34.38      4.56 o
   2  -8  12        8.13        5.76      3.37 o
   3  -8  12        0.02        0.47      3.01 o
   4  -8  12        4.74        4.05      3.51 o
  -3  -7  12        2.80        2.07      4.26 o
  -2  -7  12       17.93       18.97      6.94 o
  -1  -7  12        2.69        5.68      3.67 o
   0  -7  12        4.18        5.20      2.80 o
   1  -7  12        0.01        1.10      1.97 o
   2  -7  12       15.99       21.06      3.54 o
   3  -7  12        0.93        0.94      3.99 o
   4  -7  12        0.03        0.59      2.78 o
   5  -7  12       18.51       16.20      3.84 o
  -4  -6  12        0.86       -1.34      3.76 o
  -3  -6  12       12.93       12.93      3.57 o
  -2  -6  12       25.22       33.18      4.18 o
  -1  -6  12       18.93       19.53      3.51 o
   0  -6  12        3.91        4.36      2.18 o
   1  -6  12        3.61        0.88      1.67 o
   2  -6  12       17.56       15.11      2.64 o
   3  -6  12       12.47       18.04      3.39 o
   4  -6  12       12.40       10.67      3.66 o
   5  -6  12       11.34       15.56      3.56 o
   6  -6  12        3.94        2.79      3.51 o
  -5  -5  12        0.32       -1.63      3.44 o
  -4  -5  12       14.78       14.96      3.63 o
  -3  -5  12        0.72       -0.57      2.39 o
  -2  -5  12        6.32        6.73      2.37 o
  -1  -5  12        0.65        1.11      1.52 o
   0  -5  12        0.07        0.58      1.63 o
   1  -5  12      381.57      373.32      8.32 o
   2  -5  12        1.77        1.70      1.87 o
   3  -5  12      126.92      123.82      6.54 o
   4  -5  12       29.67       29.46      3.98 o
   5  -5  12       23.95       25.01      3.89 o
   6  -5  12       77.29       84.60      8.74 o
  -6  -4  12       10.33       20.90      5.18 o
  -5  -4  12       16.84       22.89      4.10 o
  -4  -4  12       11.57       16.65      3.47 o
  -3  -4  12        9.71        7.86      2.38 o
  -2  -4  12       24.26       24.48      2.83 o
  -1  -4  12        1.11        2.12      1.48 o
   0  -4  12       63.44       66.47      3.88 o
   1  -4  12        8.14        7.88      2.14 o
   2  -4  12      258.28      247.72      6.77 o
   3  -4  12       16.53       13.63      2.95 o
   4  -4  12        0.65        0.61      2.13 o
   5  -4  12        2.53        2.22      2.41 o
   6  -4  12        0.09        0.38      2.33 o
  -6  -3  12       23.22       26.12      4.30 o
  -5  -3  12        2.62        1.46      2.62 o
  -4  -3  12        1.24       -1.51      1.77 o
  -3  -3  12        6.47        8.84      2.22 o
  -2  -3  12       38.80       33.90      2.52 o
  -1  -3  12      148.32      153.79      4.35 o
   0  -3  12        4.99        5.21      1.34 o
   1  -3  12        0.56        1.50      1.82 o
   2  -3  12        0.52        0.11      1.90 o
   3  -3  12      184.45      183.69      6.20 o
   4  -3  12        4.78        3.71      1.86 o
   5  -3  12        7.10        8.66      2.91 o
   6  -3  12        2.30        1.09      2.46 o
  -7  -2  12        0.30        0.48      2.89 o
  -6  -2  12        4.79        5.86      3.02 o
  -5  -2  12       41.32       42.71      3.65 o
  -4  -2  12        9.97       13.78      2.49 o
  -3  -2  12      428.97      416.52     11.58 o
  -2  -2  12        6.56        4.65      1.68 o
  -1  -2  12       15.92       11.52      1.81 o
   0  -2  12      258.58      256.26      4.94 o
   1  -2  12        0.37       -0.57      2.14 o
   2  -2  12      114.96       98.33      5.38 o
   3  -2  12        4.13        4.40      1.87 o
   4  -2  12        4.38        5.12      2.05 o
   5  -2  12        1.40        1.18      2.22 o
   6  -2  12        1.56        1.08      2.56 o
  -7  -1  12        2.91        4.28      4.17 o
  -6  -1  12        6.51        7.22      2.97 o
  -5  -1  12       24.21       27.15      3.07 o
  -4  -1  12       80.91       86.17      4.03 o
  -3  -1  12        1.77        1.20      1.61 o
  -2  -1  12      199.13      207.86      5.10 o
  -1  -1  12      370.33      371.44      6.19 o
   0  -1  12       29.87       34.16      1.92 o
   1  -1  12      330.94      313.73      7.60 o
   2  -1  12        0.56        0.80      1.48 o
   3  -1  12       25.12       23.77      2.70 o
   4  -1  12        0.00        0.17      1.86 o
   5  -1  12        4.46        2.33      2.49 o
   6  -1  12        0.68        1.01      4.52 o
  -7   0  12        0.20        1.69      2.66 o
  -6   0  12        0.02       -0.14      1.83 o
  -5   0  12       27.22       31.20      3.23 o
  -4   0  12      236.41      236.34      5.74 o
  -3   0  12      208.24      213.06      5.33 o
  -2   0  12        0.06       -0.57      1.49 o
  -1   0  12       15.27       14.40      1.75 o
   0   0  12      159.98      152.73      4.08 o
   1   0  12      129.31      132.29      3.85 o
   2   0  12       97.98       97.91      3.47 o
   3   0  12       40.56       35.46      3.05 o
   4   0  12       14.67       13.73      2.50 o
   5   0  12        7.02        5.06      3.92 o
   6   0  12        6.80       14.90      6.85 o
  -8   1  12        1.92       -1.73      4.52 o
  -7   1  12       33.98       36.12      4.53 o
  -6   1  12        0.84        0.62      2.14 o
  -5   1  12        0.22       -0.21      1.72 o
  -4   1  12      173.90      157.13      5.47 o
  -3   1  12       44.22       46.91      3.33 o
  -2   1  12      184.64      175.25      4.56 o
  -1   1  12        1.64        1.63      1.25 o
   0   1  12       97.80      100.00      3.51 o
   1   1  12       35.82       38.18      2.47 o
   2   1  12       41.10       41.75      2.35 o
   3   1  12        6.67        5.97      2.01 o
   4   1  12       37.11       31.57      3.93 o
   5   1  12       54.76       63.41     10.00 o
  -8   2  12       22.65       30.87      8.19 o
  -7   2  12        9.23        6.94      2.84 o
  -6   2  12      118.84      139.75      5.87 o
  -5   2  12       84.80       70.78     10.81 o
  -4   2  12        3.70        4.02      1.97 o
  -3   2  12      331.73      320.66      7.47 o
  -2   2  12      147.61      147.11      4.10 o
  -1   2  12      228.79      233.46      4.86 o
   0   2  12        3.78        3.46      1.71 o
   1   2  12        0.50        0.06      1.53 o
   2   2  12       10.99       12.77      2.79 o
   3   2  12       28.65       28.32      3.75 o
   4   2  12      104.18      112.94     12.33 o
   5   2  12        1.25        5.34      5.92 o
  -7   3  12        0.45       -1.04      2.10 o
  -6   3  12       22.33       24.93      3.32 o
  -5   3  12        1.80        2.97      2.01 o
  -4   3  12       35.88       34.57      3.20 o
  -3   3  12       13.24       16.65      2.54 o
  -2   3  12       11.27       13.13      2.33 o
  -1   3  12        6.81        5.83      1.96 o
   0   3  12       31.45       34.77      2.96 o
   1   3  12       10.57       11.79      2.19 o
   2   3  12        0.45       -1.31      2.44 o
   3   3  12       16.54       14.01      4.12 o
   4   3  12        1.22       12.68      6.90 o
  -7   4  12       24.79       31.62      4.56 o
  -6   4  12        0.01       -0.79      1.97 o
  -5   4  12        4.09        3.80      2.09 o
  -4   4  12       11.77       14.63      2.68 o
  -3   4  12       23.65       21.41      2.85 o
  -2   4  12       21.13       16.95      2.59 o
  -1   4  12        0.56        0.33      1.64 o
   0   4  12        0.47       -0.29      2.18 o
   1   4  12        2.34        3.59      2.07 o
   2   4  12        0.45        0.36      2.58 o
   3   4  12       16.34       16.40      4.70 o
  -7   5  12       29.77       37.90      6.01 o
  -6   5  12        0.83        2.57      2.43 o
  -5   5  12       16.20       15.59      3.45 o
  -4   5  12        4.08        3.26      2.10 o
  -3   5  12      120.36      119.58      5.46 o
  -2   5  12       11.91       14.37      2.63 o
  -1   5  12        0.00       -0.94      2.18 o
   0   5  12        2.61        0.78      2.54 o
   1   5  12        6.52        4.94      3.02 o
   2   5  12        4.99       -0.12      3.73 o
  -6   6  12        0.05       -1.34      2.37 o
  -5   6  12        0.07        0.33      2.40 o
  -4   6  12       12.41       12.21      3.18 o
  -3   6  12        0.12       -0.88      1.94 o
  -2   6  12       69.57       76.12      5.87 o
  -1   6  12       15.11       18.94      3.92 o
   0   6  12        5.39        4.51      3.32 o
   1   6  12        0.22       -4.73      7.20 o
  -4   7  12       20.67       23.36      5.60 o
  -3   7  12        2.74        0.31      3.68 o
  -2   7  12        9.88       12.80      4.88 o
  -1   7  12       16.98       22.70      5.79 o
   0  -8  13        9.72       13.16      4.90 o
   1  -8  13       38.00       43.27      6.29 o
   2  -8  13       10.20       10.79      4.10 o
   3  -8  13       11.71       13.58      4.49 o
  -2  -7  13        0.36       -4.52      4.52 o
  -1  -7  13      136.28      172.19     14.63 o
   0  -7  13        0.13        0.63      2.74 o
   1  -7  13       13.89       11.92      2.87 o
   2  -7  13       28.46       32.23      4.24 o
   3  -7  13        0.64        2.99      3.04 o
   4  -7  13        6.37        8.94      3.91 o
  -4  -6  13       19.28       22.17      5.50 o
  -3  -6  13        4.45        5.71      4.13 o
  -2  -6  13        6.49       10.56      4.27 o
  -1  -6  13        3.29       -0.97      2.54 o
   0  -6  13       18.61       23.66      3.00 o
   1  -6  13        0.27        0.52      1.82 o
   2  -6  13        5.10        5.47      2.25 o
   3  -6  13       15.57       17.93      3.55 o
   4  -6  13       20.35       21.42      5.23 o
   5  -6  13        4.04        2.58      3.16 o
  -5  -5  13       20.04       18.46      5.20 o
  -4  -5  13        0.04       -0.56      2.85 o
  -3  -5  13       19.91       17.72      3.63 o
  -2  -5  13       27.98       37.96      3.59 o
  -1  -5  13        9.51        7.22      2.83 o
   0  -5  13        2.03       -1.45      1.71 o
   1  -5  13        3.47        2.13      2.00 o
   2  -5  13        7.99        4.38      2.17 o
   3  -5  13       19.06       19.16      3.53 o
   4  -5  13       24.05       24.20      3.94 o
   5  -5  13       35.00       22.44      4.81 o
   6  -5  13       17.05       10.08      3.38 o
  -5  -4  13        2.90        5.29      3.40 o
  -4  -4  13        6.19        6.75      2.99 o
  -3  -4  13       30.90       34.55      3.46 o
  -2  -4  13       42.77       37.00      3.34 o
  -1  -4  13       55.96       58.69      3.70 o
   0  -4  13      136.24      130.41      5.23 o
   1  -4  13      205.62      208.33      6.46 o
   2  -4  13       13.09       12.53      2.98 o
   3  -4  13      165.21      160.77      7.33 o
   4  -4  13        0.64        3.35      2.53 o
   5  -4  13        8.59       14.96      4.11 o
   6  -4  13        6.97        7.83      3.88 o
  -6  -3  13       16.36       21.23      5.17 o
  -5  -3  13       26.68       23.45      3.91 o
  -4  -3  13        1.58        1.95      2.18 o
  -3  -3  13       12.22       16.09      2.66 o
  -2  -3  13        3.06        3.85      1.63 o
  -1  -3  13      101.79      100.70      3.73 o
   0  -3  13        4.70        6.02      2.12 o
   1  -3  13        0.01       -0.12      1.92 o
   2  -3  13       13.56       11.47      2.81 o
   3  -3  13       24.02       25.20      2.99 o
   4  -3  13       18.40       17.68      3.43 o
   5  -3  13        2.62        0.67      2.36 o
   6  -3  13        4.88        2.94      3.58 o
  -6  -2  13       76.35       93.64      6.45 o
  -5  -2  13        0.02        0.15      2.01 o
  -4  -2  13       63.21       60.53      4.08 o
  -3  -2  13        4.69        5.82      1.77 o
  -2  -2  13      145.72      139.94      4.38 o
  -1  -2  13      228.90      222.23      5.76 o
   0  -2  13       31.79       34.67      3.72 o
   1  -2  13        9.68        8.22      2.71 o
   2  -2  13       26.82       20.10      3.25 o
   3  -2  13        5.16        4.67      1.97 o
   4  -2  13        3.92        3.27      1.98 o
   5  -2  13        0.08        1.83      2.45 o
   6  -2  13        1.25        5.53      5.51 o
  -7  -1  13        9.18        7.89      3.47 o
  -6  -1  13        3.18        4.83      2.79 o
  -5  -1  13        9.05        9.42      2.48 o
  -4  -1  13        1.69       -0.09      1.61 o
  -3  -1  13       56.61       46.10      3.00 o
  -2  -1  13      106.01      114.35      4.14 o
  -1  -1  13        0.07        0.56      1.56 o
   0  -1  13       17.59       18.06      2.06 o
   1  -1  13       55.53       51.65      4.29 o
   2  -1  13        4.93        5.70      3.04 o
   3  -1  13       28.43       25.94      2.92 o
   4  -1  13        1.48        0.99      1.91 o
   5  -1  13        5.49        8.14      4.35 o
   6  -1  13        1.77        7.01      5.59 o
  -7   0  13        0.01       -1.65      2.55 o
  -6   0  13       18.65       17.54      3.00 o
  -5   0  13       10.07        8.67      2.34 o
  -4   0  13       10.77        7.13      1.94 o
  -3   0  13       11.32       10.11      2.27 o
  -2   0  13       75.68       75.04      3.42 o
  -1   0  13        4.41        4.09      1.48 o
   0   0  13       15.20       11.56      1.70 o
   1   0  13       62.58       62.73      3.33 o
   2   0  13       78.94       71.81      4.02 o
   3   0  13        8.06        7.30      2.24 o
   4   0  13        6.98        5.97      2.96 o
   5   0  13        0.50       -5.32      6.55 o
  -7   1  13        3.54        6.41      3.20 o
  -6   1  13        7.82        6.48      2.75 o
  -5   1  13        0.16       -0.13      1.81 o
  -4   1  13      106.08      101.64      4.77 o
  -3   1  13        8.17        7.41      2.03 o
  -2   1  13       74.69       72.05      3.32 o
  -1   1  13       70.72       70.69      3.19 o
   0   1  13       22.56       23.59      2.15 o
   1   1  13        0.07        0.45      1.57 o
   2   1  13        4.12        2.10      1.49 o
   3   1  13        1.36        1.01      2.30 o
   4   1  13        3.59        3.07      5.83 o
   5   1  13        1.96        6.99      5.86 o
  -7   2  13       20.81       26.52      4.26 o
  -6   2  13        1.19        0.43      2.05 o
  -5   2  13        1.65       -0.08      1.70 o
  -4   2  13        9.89        7.78      2.19 o
  -3   2  13       65.34       66.45      3.96 o
  -2   2  13       19.66       19.32      2.61 o
  -1   2  13       46.35       53.25      3.54 o
   0   2  13       67.35       71.88      3.93 o
   1   2  13       19.27       18.61      2.78 o
   2   2  13        4.27        3.91      2.54 o
   3   2  13        0.06       -2.57      3.56 o
   4   2  13       39.86       42.81      9.12 o
  -7   3  13        5.50        7.74      3.65 o
  -6   3  13        4.37        4.57      2.44 o
  -5   3  13        2.09        2.09      2.01 o
  -4   3  13       27.70       32.30      3.37 o
  -3   3  13       33.52       33.43      3.24 o
  -2   3  13       16.94       15.61      2.54 o
  -1   3  13        0.40       -0.85      1.51 o
   0   3  13       11.71       11.70      2.37 o
   1   3  13        2.05        2.03      1.91 o
   2   3  13        0.14       -0.40      2.47 o
   3   3  13        0.48        0.30      5.64 o
   4   3  13        3.44       10.19      6.60 o
  -7   4  13        1.04       -0.38      2.69 o
  -6   4  13        4.24        3.14      2.70 o
  -5   4  13       15.43       19.16      3.22 o
  -4   4  13        2.51        2.66      1.98 o
  -3   4  13       13.80       14.48      2.71 o
  -2   4  13       22.01       25.04      3.03 o
  -1   4  13        7.36        4.72      2.09 o
   0   4  13        0.58        0.54      2.49 o
   1   4  13        0.18       -1.90      1.90 o
   2   4  13        3.13        1.12      3.39 o
   3   4  13        0.45       -0.77      6.77 o
  -6   5  13        9.18       11.25      3.44 o
  -5   5  13        1.50        1.35      2.35 o
  -4   5  13       18.02       15.58      3.46 o
  -3   5  13       50.01       50.29      4.09 o
  -2   5  13       12.79       12.93      2.73 o
  -1   5  13       25.27       26.37      4.14 o
   0   5  13        4.76        6.65      3.29 o
   1   5  13        7.09        7.39      4.06 o
   2   5  13       10.31        2.43      4.21 o
  -5   6  13        0.82       -1.50      2.42 o
  -4   6  13        1.03        0.07      2.39 o
  -3   6  13       19.97       14.77      4.82 o
  -2   6  13        6.59        5.79      3.96 o
  -1   6  13       28.40       30.00      4.74 o
   0   6  13       20.30       24.16      4.26 o
  -2  -7  14       27.28       26.16      8.35 o
  -1  -7  14        4.84        0.54      3.82 o
   0  -7  14        1.47       -0.51      2.92 o
   1  -7  14       10.35       12.14      4.41 o
   2  -7  14       27.31       30.07      5.10 o
   3  -7  14       11.70       12.74      4.18 o
  -3  -6  14        9.43       15.86      7.07 o
  -2  -6  14       25.58       29.62      5.43 o
  -1  -6  14        0.13       -0.61      2.74 o
   0  -6  14       17.12       22.10      3.94 o
   1  -6  14        1.20        1.23      1.89 o
   2  -6  14        2.41        2.88      2.58 o
   3  -6  14        0.63        0.35      4.10 o
   4  -6  14       76.76       82.88      7.70 o
  -4  -5  14        0.27        1.85      3.63 o
  -3  -5  14        4.93        3.63      3.62 o
  -2  -5  14       14.09       11.23      3.45 o
  -1  -5  14        0.14       -2.41      2.41 o
   0  -5  14        5.25        1.58      2.05 o
   1  -5  14       18.30       18.92      2.90 o
   2  -5  14       69.49       66.56      4.43 o
   3  -5  14        0.01        1.33      2.44 o
   4  -5  14       62.49       56.29     12.72 o
   5  -5  14       14.70       15.96      4.49 o
  -5  -4  14        0.16       -2.01      3.42 o
  -4  -4  14       44.66       54.67      5.15 o
  -3  -4  14        6.30        3.87      2.26 o
  -2  -4  14       30.08       38.67      5.54 o
  -1  -4  14        7.00        8.73      2.35 o
   0  -4  14      100.40       78.59      6.47 o
   1  -4  14        0.02       -0.45      1.83 o
   2  -4  14       35.31       32.06      4.03 o
   3  -4  14       16.12       16.73      3.45 o
   4  -4  14        4.04        3.78      3.06 o
   5  -4  14        0.47        2.14      3.12 o
  -6  -3  14       25.99       37.87      6.77 o
  -5  -3  14        0.92        0.63      2.72 o
  -4  -3  14       37.35       46.81      3.98 o
  -3  -3  14       14.88       20.26      2.94 o
  -2  -3  14       66.85       76.19      4.68 o
  -1  -3  14       65.54       55.11      3.87 o
   0  -3  14        3.67        2.25      1.96 o
   1  -3  14      148.64      154.43      6.87 o
   2  -3  14        1.57       -0.53      2.09 o
   3  -3  14        5.40        5.02      2.62 o
   4  -3  14        1.77        2.01      2.44 o
   5  -3  14        1.03        3.34      3.13 o
  -6  -2  14        2.75        3.08      3.13 o
  -5  -2  14       10.86       14.36      2.99 o
  -4  -2  14        6.19        5.63      2.32 o
  -3  -2  14       14.49       12.64      2.15 o
  -2  -2  14       13.83       12.36      2.04 o
  -1  -2  14       64.18       55.89      3.53 o
   0  -2  14       26.60       29.40      3.70 o
   1  -2  14        2.22        1.34      2.22 o
   2  -2  14       36.74       36.06      4.06 o
   3  -2  14       31.41       27.94      3.82 o
   4  -2  14       15.64        6.29      2.96 o
   5  -2  14        1.02        3.32      3.12 o
  -6  -1  14       42.70       57.46      5.39 o
  -5  -1  14        0.01       -1.39      1.81 o
  -4  -1  14       29.10       22.66      3.00 o
  -3  -1  14       61.40       66.67      3.56 o
  -2  -1  14      307.80      283.06     11.61 o
  -1  -1  14       67.52       70.99      5.02 o
   0  -1  14       10.43       10.97      3.34 o
   1  -1  14        2.78        5.48      2.67 o
   2  -1  14       27.08       22.25      3.52 o
   3  -1  14        0.11        1.90      1.92 o
   4  -1  14       11.48       13.11      2.79 o
   5  -1  14        0.28        0.07      3.83 o
  -7   0  14       16.23       18.37      5.13 o
  -6   0  14        0.98       -0.22      2.12 o
  -5   0  14        0.06        0.18      1.85 o
  -4   0  14        2.25        2.89      2.04 o
  -3   0  14        0.51        0.15      1.81 o
  -2   0  14      170.09      173.26      5.70 o
  -1   0  14       25.10       27.14      2.75 o
   0   0  14       22.20       20.39      2.45 o
   1   0  14        3.54        2.74      2.51 o
   2   0  14       15.93       17.01      3.28 o
   3   0  14        0.27       -1.80      1.80 o
   4   0  14        7.38        7.64      3.12 o
   5   0  14        3.57       10.98      6.46 o
  -7   1  14        2.09        3.88      2.89 o
  -6   1  14       60.89       69.70      5.57 o
  -5   1  14       12.31       15.52      2.89 o
  -4   1  14        0.35       -1.58      1.68 o
  -3   1  14       68.40       69.12      4.14 o
  -2   1  14        0.70       -0.69      1.57 o
  -1   1  14       44.49       41.34      3.24 o
   0   1  14       54.62       57.77      3.63 o
   1   1  14       27.81       28.28      2.80 o
   2   1  14       14.77       18.39      3.37 o
   3   1  14        5.85       10.18      6.37 o
   4   1  14       13.41       14.10      6.59 o
  -7   2  14        0.50        4.73      3.41 o
  -6   2  14       25.14       34.03      3.81 o
  -5   2  14       46.52       34.45     10.68 o
  -4   2  14       20.50       17.79      2.83 o
  -3   2  14       27.43       27.24      3.10 o
  -2   2  14        2.16        1.75      1.76 o
  -1   2  14        1.31        1.27      1.80 o
   0   2  14       10.65        9.49      2.35 o
   1   2  14        3.30        2.04      1.55 o
   2   2  14        0.50        0.08      6.00 o
   3   2  14        0.12       -2.47      4.00 o
   4   2  14        1.17        6.08      6.74 o
  -7   3  14       77.39       99.42      8.40 o
  -6   3  14        1.53        0.92      2.43 o
  -5   3  14        4.88        6.23      2.46 o
  -4   3  14       80.37       86.14      4.90 o
  -3   3  14       71.03       69.24      4.53 o
  -2   3  14      101.74      104.06      5.04 o
  -1   3  14        3.50        2.72      1.98 o
   0   3  14       10.53       11.17      2.50 o
   1   3  14        7.68       14.36      2.74 o
   2   3  14        0.48       -2.80      3.71 o
   3   3  14        6.57        0.63      6.14 o
  -6   4  14        0.65       -0.45      2.43 o
  -5   4  14        0.26        0.06      2.22 o
  -4   4  14        7.18        2.63      2.28 o
  -3   4  14       13.84       14.03      2.88 o
  -2   4  14       18.65       16.14      2.90 o
  -1   4  14        1.87        0.43      2.43 o
   0   4  14       30.15       31.53      4.28 o
   1   4  14        0.03       -0.22      2.62 o
   2   4  14       44.83       44.70     10.03 o
  -6   5  14       11.82       11.00      3.65 o
  -5   5  14        9.96        8.34      3.31 o
  -4   5  14        0.95        1.65      2.57 o
  -3   5  14        3.62        2.64      2.75 o
  -2   5  14       33.71       34.67      4.66 o
  -1   5  14       12.98       12.27      3.65 o
   0   5  14        0.97       -1.92      2.95 o
   1   5  14       11.91       13.60      4.38 o
  -4   6  14        1.10        1.30      2.71 o
  -3   6  14        5.81        3.36      4.03 o
  -2   6  14        8.11        7.98      5.15 o
  -1   6  14        0.24       -4.18      6.29 o
  -1  -7  15        4.13        6.60      6.41 o
   0  -7  15        3.48        0.81      3.75 o
   1  -7  15        4.11        3.74      4.01 o
   2  -7  15        7.16        7.73      3.93 o
  -2  -6  15       24.27       28.88      5.69 o
  -1  -6  15       70.69       69.01      5.93 o
   0  -6  15        4.64        2.32      3.02 o
   1  -6  15        3.34        2.58      2.21 o
   2  -6  15        0.68       -0.70      4.60 o
   3  -6  15        2.20        1.83      3.67 o
   4  -6  15        8.56       13.72      4.51 o
  -4  -5  15        6.12       12.93      7.01 o
  -3  -5  15        0.16       -0.70      3.36 o
  -2  -5  15       34.94       42.75      4.94 o
  -1  -5  15        9.44        9.78      3.47 o
   0  -5  15        0.09        0.04      2.02 o
   1  -5  15        3.91        2.61      2.16 o
   2  -5  15       63.53       68.88      5.59 o
   3  -5  15       78.65       89.00     14.07 o
   4  -5  15       32.52       34.03      5.73 o
  -5  -4  15       29.52       39.95      6.35 o
  -4  -4  15        4.04        3.76      3.42 o
  -3  -4  15        0.94        0.08      2.79 o
  -2  -4  15        1.51        2.29      2.85 o
  -1  -4  15       18.41       20.24      2.94 o
   0  -4  15        0.47        1.13      1.73 o
   1  -4  15        8.14        8.65      2.93 o
   2  -4  15        5.15        6.64      2.87 o
   3  -4  15       26.95       24.77      4.71 o
   4  -4  15       15.26       18.75      4.62 o
   5  -4  15        0.02        1.10      3.17 o
  -5  -3  15        5.60       10.50      4.26 o
  -4  -3  15        0.54       -0.64      2.18 o
  -3  -3  15       24.08       28.84      3.32 o
  -2  -3  15       19.47       26.40      3.15 o
  -1  -3  15        0.20        1.99      2.07 o
   0  -3  15      252.48      262.08      8.81 o
   1  -3  15        0.62        0.23      2.33 o
   2  -3  15       79.90       81.72      5.76 o
   3  -3  15        9.37        7.11      3.10 o
   4  -3  15       14.95       16.41      4.32 o
   5  -3  15        2.18        1.74      3.09 o
  -6  -2  15        1.70        6.37      3.90 o
  -5  -2  15        0.89        2.76      2.76 o
  -4  -2  15        0.05        0.10      2.01 o
  -3  -2  15        0.00        0.56      2.45 o
  -2  -2  15        3.63        3.65      1.75 o
  -1  -2  15       72.95       76.44      5.32 o
   0  -2  15        2.42        2.74      2.59 o
   1  -2  15        2.58        4.03      2.75 o
   2  -2  15        7.15        4.36      2.88 o
   3  -2  15        1.40        0.43      2.56 o
   4  -2  15       18.73       15.85      4.23 o
   5  -2  15        2.56        7.38      3.90 o
  -6  -1  15       53.08       63.67      5.72 o
  -5  -1  15        8.60       11.44      2.91 o
  -4  -1  15        5.44        6.72      2.40 o
  -3  -1  15        0.02       -0.79      1.61 o
  -2  -1  15       10.57        7.58      2.14 o
  -1  -1  15       25.97       25.68      3.73 o
   0  -1  15       31.85       30.72      3.98 o
   1  -1  15        7.72        9.13      3.11 o
   2  -1  15       77.78       72.49      8.90 o
   3  -1  15        7.36        8.48      2.54 o
   4  -1  15        0.03        0.83      2.88 o
   5  -1  15        1.63        6.88      6.03 o
  -6   0  15        3.55        6.17      3.03 o
  -5   0  15       46.99       57.34      6.99 o
  -4   0  15        2.24        3.25      2.17 o
  -3   0  15       62.67       54.76      4.19 o
  -2   0  15       16.96       23.92      2.84 o
  -1   0  15        0.61        1.52      1.82 o
   0   0  15       12.52       19.42      3.49 o
   1   0  15       11.26        9.30      3.13 o
   2   0  15        8.34        6.94      2.97 o
   3   0  15        8.59        5.80      3.05 o
   4   0  15       11.93        6.76      5.59 o
  -6   1  15        0.00       -0.88      2.49 o
  -5   1  15       13.99       10.90      3.04 o
  -4   1  15       27.87       16.11      2.95 o
  -3   1  15       26.20       25.11      3.09 o
  -2   1  15        0.92       -1.63      1.63 o
  -1   1  15       21.34       19.28      2.75 o
   0   1  15       17.19       12.63      3.20 o
   1   1  15       15.75        7.46      3.00 o
   2   1  15       16.33       16.06      3.53 o
   3   1  15        7.19        7.46      7.34 o
   4   1  15        0.40        3.81      6.22 o
  -6   2  15        2.70        5.36      3.50 o
  -5   2  15       20.32       16.15      4.89 o
  -4   2  15        0.49       -1.78      1.78 o
  -3   2  15       34.78       35.46      3.50 o
  -2   2  15      120.11      120.91      5.42 o
  -1   2  15       34.73       37.88      3.88 o
   0   2  15       59.54       57.01      3.95 o
   1   2  15        9.46        7.95      4.48 o
   2   2  15        1.83        1.22      4.23 o
   3   2  15        3.61        4.43      5.83 o
  -6   3  15        3.16        2.69      3.01 o
  -5   3  15       29.44       35.98      4.47 o
  -4   3  15        1.80        0.91      2.15 o
  -3   3  15        0.25       -0.85      1.97 o
  -2   3  15       16.90       18.49      2.95 o
  -1   3  15        0.66       -0.46      2.06 o
   0   3  15        3.29        4.51      2.84 o
   1   3  15        0.74       -2.28      4.01 o
   2   3  15        0.74       -1.90      4.29 o
  -6   4  15        5.09        4.16      3.11 o
  -5   4  15        1.87        1.26      3.03 o
  -4   4  15       17.35       23.57      4.02 o
  -3   4  15       13.32        7.41      3.08 o
  -2   4  15       21.97       19.04      3.17 o
  -1   4  15        5.88        6.69      3.21 o
   0   4  15        0.52       -0.82      2.89 o
   1   4  15        0.00       -4.11      4.11 o
  -5   5  15        0.22       -1.89      2.61 o
  -4   5  15        0.49        0.27      2.61 o
  -3   5  15        0.12        2.31      2.71 o
  -2   5  15       32.00       37.55      9.08 o
  -1   5  15       11.56        7.38      4.41 o
   0   5  15        0.72        1.13      4.07 o
  -2  -6  16        0.89        3.29      6.05 o
  -1  -6  16       52.46       61.60      6.12 o
   0  -6  16       17.15       19.39      5.27 o
   1  -6  16       34.27       20.62     10.40 o
   2  -6  16        0.01        2.10      3.15 o
   3  -6  16        2.95        6.25      3.70 o
  -3  -5  16        2.64        0.03      5.20 o
  -2  -5  16        0.14       -2.70      2.70 o
  -1  -5  16       11.40        8.50      3.63 o
   0  -5  16       17.96       18.51      3.16 o
   1  -5  16        0.13        1.31      2.37 o
   2  -5  16       34.41       42.19      5.83 o
   3  -5  16        0.63        3.80      3.45 o
   4  -5  16       41.76       47.80      6.66 o
  -4  -4  16        5.87       11.94      6.77 o
  -3  -4  16       32.05       31.97      4.55 o
  -2  -4  16       16.40       16.49      3.85 o
  -1  -4  16        0.43        1.69      2.19 o
   0  -4  16        3.88        1.83      1.99 o
   1  -4  16        1.60        4.03      2.83 o
   2  -4  16       62.96       65.19      6.64 o
   3  -4  16        2.73        2.10      3.08 o
   4  -4  16       47.13       53.83      6.62 o
  -5  -3  16       30.69       36.94      6.02 o
  -4  -3  16       21.57       22.32      4.25 o
  -3  -3  16       67.72       71.79      5.76 o
  -2  -3  16       10.94       10.46      3.35 o
  -1  -3  16       22.61       26.57      3.31 o
   0  -3  16        0.28       -1.46      2.35 o
   1  -3  16       29.96       26.64      3.91 o
   2  -3  16        2.07        4.52      2.84 o
   3  -3  16        5.17        5.67      3.58 o
   4  -3  16       11.03       19.64      7.96 o
  -5  -2  16       11.87       20.28      4.86 o
  -4  -2  16       14.45       17.72      3.19 o
  -3  -2  16        4.18        2.67      2.62 o
  -2  -2  16       11.20       13.17      2.79 o
  -1  -2  16       24.21       29.13      3.98 o
   0  -2  16       69.44       64.91      5.28 o
   1  -2  16       23.33       27.92      4.07 o
   2  -2  16        9.90        7.65      3.25 o
   3  -2  16       22.17       20.24      4.56 o
   4  -2  16        0.00       -0.56      3.11 o
  -6  -1  16        8.39       11.52      4.57 o
  -5  -1  16       49.84       57.94      4.67 o
  -4  -1  16        0.72       -0.23      2.09 o
  -3  -1  16        0.61        1.83      2.00 o
  -2  -1  16       13.44       10.36      2.89 o
  -1  -1  16       44.85       37.35      4.47 o
   0  -1  16       56.69       58.63      5.12 o
   1  -1  16        2.75        2.34      2.77 o
   2  -1  16        8.74        7.65      3.21 o
   3  -1  16        7.85       12.10      4.10 o
   4  -1  16        5.25        8.33      6.11 o
  -6   0  16        0.01        1.35      3.24 o
  -5   0  16        0.62        0.95      2.64 o
  -4   0  16       22.72       27.63      3.38 o
  -3   0  16        8.92        4.47      1.97 o
  -2   0  16       10.21        7.10      2.33 o
  -1   0  16       40.49       40.69      4.41 o
   0   0  16        0.85       -0.57      2.49 o
   1   0  16       23.99       24.35      3.99 o
   2   0  16       29.88       32.68      4.41 o
   3   0  16       17.97       19.83      7.26 o
   4   0  16        4.92       12.46      6.85 o
  -6   1  16        0.82        0.18      3.16 o
  -5   1  16        7.20        5.76      3.49 o
  -4   1  16        1.94       -0.80      1.92 o
  -3   1  16       87.37       91.52      5.02 o
  -2   1  16       22.33       25.53      3.18 o
  -1   1  16        1.59        0.08      2.62 o
   0   1  16        0.63       -2.39      2.45 o
   1   1  16        2.28        1.70      2.93 o
   2   1  16       12.03       10.70      4.77 o
   3   1  16        5.82        5.67      6.52 o
  -6   2  16       14.25       18.00      4.75 o
  -5   2  16       17.40       10.28      6.02 o
  -4   2  16        3.06        2.92      3.01 o
  -3   2  16        0.14       -0.05      2.06 o
  -2   2  16        9.92        8.78      2.62 o
  -1   2  16       23.23       24.70      3.20 o
   0   2  16        8.44        9.48      3.27 o
   1   2  16       38.43       38.45      6.34 o
   2   2  16       23.80       23.53      5.97 o
   3   2  16        0.09        6.77      6.55 o
  -5   3  16        0.19       -0.68      2.86 o
  -4   3  16        1.77       -0.75      2.38 o
  -3   3  16        0.83       -0.02      2.34 o
  -2   3  16        0.00       -2.07      2.07 o
  -1   3  16        0.97        0.77      2.23 o
   0   3  16        3.91       -3.54      3.54 o
   1   3  16        0.00        2.38      6.71 o
   2   3  16        0.83       -5.75      6.38 o
  -5   4  16        3.04        1.85      2.87 o
  -4   4  16        0.37       -1.43      2.43 o
  -3   4  16        0.03       -2.24      2.24 o
  -2   4  16        7.73        5.33      2.91 o
  -1   4  16       35.00       42.17      6.13 o
   0   4  16        0.04       -4.55      5.51 o
  -3   5  16        3.36        1.98      5.05 o
  -2   5  16       27.75       28.65      5.99 o
   0  -6  17       31.49       26.71      5.87 o
   1  -6  17        0.17        2.21      2.80 o
  -2  -5  17       20.83       17.12      7.34 o
  -1  -5  17        5.26        4.20      4.21 o
   0  -5  17       12.29       14.85      4.54 o
   1  -5  17       13.48       19.44      4.73 o
   2  -5  17        0.73        0.52      3.17 o
   3  -5  17       14.31       17.95      4.83 o
  -3  -4  17       16.78       18.48      5.28 o
  -2  -4  17        1.09       -1.99      3.13 o
  -1  -4  17        2.61       -0.27      3.02 o
   0  -4  17        1.48        3.37      3.04 o
   1  -4  17        4.12        7.83      3.65 o
   2  -4  17        0.00        1.06      3.07 o
   3  -4  17       63.97       69.89     10.41 o
  -4  -3  17        0.05       -0.96      4.90 o
  -3  -3  17       27.18       31.58      4.62 o
  -2  -3  17       11.32       14.56      3.77 o
  -1  -3  17        1.79        7.08      3.05 o
   0  -3  17       26.37       30.12      4.22 o
   1  -3  17        0.03        1.84      3.20 o
   2  -3  17       12.99       16.28      4.44 o
   3  -3  17        0.13        1.13      3.22 o
  -5  -2  17        0.95        1.78      3.43 o
  -4  -2  17        0.22       -0.73      2.82 o
  -3  -2  17       13.46       16.44      3.87 o
  -2  -2  17        2.93        3.97      4.38 o
  -1  -2  17        3.98        3.00      3.33 o
   0  -2  17       55.70       58.60      7.80 o
   1  -2  17       29.97       26.55      4.26 o
   2  -2  17        3.04        5.75      4.46 o
   3  -2  17        3.19        3.23      3.55 o
  -5  -1  17       54.44       70.64      7.18 o
  -4  -1  17       13.56       14.67      3.51 o
  -3  -1  17        1.52       -1.00      2.45 o
  -2  -1  17        0.88        1.66      2.71 o
  -1  -1  17      136.85      149.74      7.52 o
   0  -1  17       10.77        6.49      3.17 o
   1  -1  17        1.74        2.86      3.07 o
   2  -1  17        0.05        2.87      3.44 o
   3  -1  17        6.17        8.06      4.10 o
  -5   0  17        9.90       13.85      6.45 o
  -4   0  17        5.96        6.60      3.29 o
  -3   0  17       16.90       10.41      3.20 o
  -2   0  17        0.76       -2.40      2.40 o
  -1   0  17        0.45       -1.14      2.74 o
   0   0  17       18.35       18.62      3.77 o
   1   0  17        0.64        0.98      3.59 o
   2   0  17       13.64       12.78      4.42 o
   3   0  17        6.63        6.36      6.19 o
  -5   1  17        0.93       -0.17      3.01 o
  -4   1  17        9.12        6.23      4.24 o
  -3   1  17        3.29        2.49      2.87 o
  -2   1  17      110.40      115.15      6.92 o
  -1   1  17        3.32        2.10      3.01 o
   0   1  17        0.01       -1.28      2.81 o
   1   1  17        7.03        6.87      4.05 o
   2   1  17        0.63       -5.34      5.34 o
  -5   2  17        1.81        0.11      3.11 o
  -4   2  17        4.69        0.72      2.82 o
  -3   2  17        8.27        9.60      3.22 o
  -2   2  17        6.63        5.35      2.95 o
  -1   2  17       10.91        7.23      3.95 o
   0   2  17        0.39       -1.33      3.09 o
   1   2  17        0.08        3.81      6.41 o
   2   2  17        2.40        4.93      6.96 o
  -5   3  17        0.18       -2.71      2.95 o
  -4   3  17        3.61        2.15      2.90 o
  -3   3  17       17.49       13.67      3.66 o
  -2   3  17       20.25       20.79      3.87 o
  -1   3  17       11.39        6.25      7.20 o
   0   3  17        6.10        5.62      7.29 o
   1   3  17        3.54        3.04      7.09 o
  -3   4  17        7.64        7.89      3.49 o
  -2   4  17        4.50        3.91      4.41 o
  -1   4  17        1.42       -0.47      7.20 o
  -1  -5  18       11.86       13.31      6.88 o
   0  -5  18        8.50       11.22      4.78 o
   1  -5  18        1.95        7.00      4.01 o
  -2  -4  18       13.84       12.55      6.90 o
  -1  -4  18       28.72       18.68      5.01 o
   0  -4  18        5.12        9.94      3.86 o
   1  -4  18        3.06        5.18      3.57 o
   2  -4  18       12.67        8.68      3.99 o
  -3  -3  18       27.54       29.09      8.27 o
  -2  -3  18        0.13       -2.91      2.91 o
  -1  -3  18       13.56       20.37      4.60 o
   0  -3  18        3.62        2.50      3.42 o
   1  -3  18       52.00       55.93     12.22 o
   2  -3  18        0.90        4.55      3.59 o
  -4  -2  18       64.72       88.34     11.89 o
  -3  -2  18        3.77        6.05      5.97 o
  -2  -2  18       24.38       32.96      8.18 o
  -1  -2  18       33.09       41.39      5.73 o
   0  -2  18       10.48       11.83      4.31 o
   1  -2  18        0.26        1.49      3.48 o
   2  -2  18        0.47        1.80      3.60 o
   3  -2  18       20.56       25.32      5.42 o
  -4  -1  18       38.86       54.02      9.72 o
  -3  -1  18       23.64       19.53      7.18 o
  -2  -1  18        0.04       -0.31      3.12 o
  -1  -1  18       39.13       45.87      6.02 o
   0  -1  18        1.73       -0.39      3.46 o
   1  -1  18       20.82       20.81      4.84 o
   2  -1  18       26.79       40.28      6.13 o
  -4   0  18        3.58        3.51      4.85 o
  -3   0  18       12.72       15.53      4.60 o
  -2   0  18        2.38        3.23      3.74 o
  -1   0  18        2.42        4.09      3.76 o
   0   0  18        0.00        4.36      3.81 o
   1   0  18        3.01        3.55      3.90 o
   2   0  18        4.61        2.33      3.76 o
  -4   1  18        2.68        1.12      5.75 o
  -3   1  18        0.28       -4.66      4.66 o
  -2   1  18        2.29       -0.07      3.53 o
  -1   1  18       54.86       64.55      7.10 o
   0   1  18        3.52        5.11      3.98 o
   1   1  18        5.46        0.85      6.44 o
  -4   2  18       21.38       27.64      4.48 o
  -3   2  18        1.34       -3.02      3.36 o
  -2   2  18       64.76       83.74      7.94 o
  -1   2  18       10.68        7.00      4.39 o
   0   2  18        8.85       14.76      7.83 o
   1   2  18       31.37       41.86     10.08 o
  -3   3  18       13.23       16.20      4.02 o
  -2   3  18        0.33       -3.14      3.52 o
  -1   3  18       17.88       14.82      8.79 o
   0  -4  19       26.01       35.97      8.03 o
  -2  -3  19       13.08       17.86      7.45 o
  -1  -3  19        0.01        1.98      4.90 o
   0  -3  19        0.50        2.69      4.75 o
   1  -3  19        2.99        4.69      3.99 o
  -3  -2  19        1.12        1.51      5.09 o
  -2  -2  19       12.87       11.81      6.46 o
  -1  -2  19        0.03       -0.95      3.26 o
   0  -2  19       16.47       22.61      5.08 o
   1  -2  19       28.89       33.69      5.91 o
  -3  -1  19       11.16        5.89      5.94 o
  -2  -1  19        0.15        3.94      3.91 o
  -1  -1  19        2.79        3.71      4.05 o
   0  -1  19       47.70       63.20      7.24 o
   1  -1  19       24.54       24.63      5.50 o
  -3   0  19        3.08        2.75      4.00 o
  -2   0  19        0.00        4.46      4.03 o
  -1   0  19       12.90       12.05      4.63 o
   0   0  19        0.46       -0.88      3.59 o
   1   0  19        2.93        6.18      4.35 o
  -3   1  19        0.84       -3.47      3.47 o
  -2   1  19       20.90       19.22      5.22 o
  -1   1  19        9.91       14.23      4.83 o
   0   1  19        1.75        1.16      3.98 o
  -2   2  19        3.63        0.82      3.80 o
 
