# Supplementary material
Source: publisher figshare collection journal article supplement (https://acs.figshare.com/ndownloader/files/4106071)
Supplement: Supplementary file 2 [file 4106071 › polyII-11s_sk19_pmdi12_0s.cif]

data_polyII_11s_sk19_pmdi12_0s
 
_audit_creation_method            SHELXL-97
_chemical_name_systematic
;
 ?
;
_chemical_name_common             ?
_chemical_melting_point           ?
_chemical_formula_moiety          'C34 H48 N2 O4'
_chemical_formula_sum
 'C34 H48 N2 O4'

_chemical_formula_weight           548.74

 
loop_
 _atom_type_symbol
 _atom_type_description
 _atom_type_scat_dispersion_real
 _atom_type_scat_dispersion_imag
 _atom_type_scat_source
 'C'  'C'   0.0033   0.0016
 'International Tables Vol C Tables 4.2.6.8 and 6.1.1.4'
 'H'  'H'   0.0000   0.0000
 'International Tables Vol C Tables 4.2.6.8 and 6.1.1.4'
 'N'  'N'   0.0061   0.0033
 'International Tables Vol C Tables 4.2.6.8 and 6.1.1.4'
 'O'  'O'   0.0106   0.0060
 'International Tables Vol C Tables 4.2.6.8 and 6.1.1.4'
 
_symmetry_cell_setting            Monoclinic
_symmetry_space_group_name_H-M    C2/c
_symmetry_space_group_name_Hall '-C 2yc'
 
loop_
 _symmetry_equiv_pos_as_xyz
 'x, y, z'
 '-x, y, -z+1/2'
 'x+1/2, y+1/2, z'
 '-x+1/2, y+1/2, -z+1/2'
 '-x, -y, -z'
 'x, -y, z-1/2'
 '-x+1/2, -y+1/2, -z'
 'x+1/2, -y+1/2, z-1/2'
 
_cell_length_a                    19.5309(7)
_cell_length_b                    10.1243(4)
_cell_length_c                    17.5617(6)
_cell_angle_alpha                 90.00
_cell_angle_beta                  121.9510(10)
_cell_angle_gamma                 90.00
_cell_volume                      2946.50(19)
_cell_formula_units_Z             4
_cell_measurement_temperature     173(2)
_cell_measurement_reflns_used     4742
_cell_measurement_theta_min       2.36
_cell_measurement_theta_max       28.06
 
_exptl_crystal_description        block
_exptl_crystal_colour             colourless
_exptl_crystal_size_max           0.49
_exptl_crystal_size_mid           0.22
_exptl_crystal_size_min           0.10
_exptl_crystal_density_meas       ?
_exptl_crystal_density_diffrn     1.237
_exptl_crystal_density_method     'not measured'
_exptl_crystal_F_000              1192
_exptl_absorpt_coefficient_mu     0.080
_exptl_absorpt_correction_type    none
_exptl_absorpt_correction_T_min   ?
_exptl_absorpt_correction_T_max   ?
_exptl_absorpt_process_details    ?
 
_exptl_special_details
;
 ?
;
 
_diffrn_ambient_temperature       173(2)
_diffrn_radiation_wavelength      0.71073
_diffrn_radiation_type            MoK\a
_diffrn_radiation_source          'fine-focus sealed tube'
_diffrn_radiation_monochromator   graphite
_diffrn_measurement_device_type   'Bruker APEX-II CCD'
_diffrn_measurement_method        '\f and \w scans'
_diffrn_detector_area_resol_mean  ?
_diffrn_standards_number          0
_diffrn_standards_interval_count  ?
_diffrn_standards_interval_time   ?
_diffrn_standards_decay_%         ?
_diffrn_reflns_number             19137
_diffrn_reflns_av_R_equivalents   0.0606
_diffrn_reflns_av_sigmaI/netI     0.0439
_diffrn_reflns_limit_h_min        -25
_diffrn_reflns_limit_h_max        25
_diffrn_reflns_limit_k_min        -13
_diffrn_reflns_limit_k_max        13
_diffrn_reflns_limit_l_min        -23
_diffrn_reflns_limit_l_max        23
_diffrn_reflns_theta_min          2.36
_diffrn_reflns_theta_max          28.00
_reflns_number_total              3567
_reflns_number_gt                 2594
_reflns_threshold_expression      >2sigma(I)
 
_computing_data_collection        'Bruker APEX2'
_computing_cell_refinement        'Bruker SAINT'
_computing_data_reduction         'Bruker SAINT'
_computing_structure_solution     'SHELXS-97 (Sheldrick, 2008)'
_computing_structure_refinement   'SHELXL-97 (Sheldrick, 1997)'
_computing_molecular_graphics     'Bruker SHELXTL'
_computing_publication_material   'Bruker SHELXTL'
 
_refine_special_details
;
 Refinement of F^2^ against ALL reflections.  The weighted R-factor wR and
 goodness of fit S are based on F^2^, conventional R-factors R are based
 on F, with F set to zero for negative F^2^. The threshold expression of
 F^2^ > 2sigma(F^2^) is used only for calculating R-factors(gt) etc. and is
 not relevant to the choice of reflections for refinement.  R-factors based
 on F^2^ are statistically about twice as large as those based on F, and R-
 factors based on ALL data will be even larger.
;
 
_refine_ls_structure_factor_coef  Fsqd
_refine_ls_matrix_type            full
_refine_ls_weighting_scheme       calc
_refine_ls_weighting_details
 'calc w=1/[\s^2^(Fo^2^)+(0.0517P)^2^+0.2996P] where P=(Fo^2^+2Fc^2^)/3'
_atom_sites_solution_primary      direct
_atom_sites_solution_secondary    difmap
_atom_sites_solution_hydrogens    geom
_refine_ls_hydrogen_treatment     constr
_refine_ls_extinction_method      none
_refine_ls_extinction_coef        ?
_refine_ls_number_reflns          3567
_refine_ls_number_parameters      181
_refine_ls_number_restraints      0
_refine_ls_R_factor_all           0.0621
_refine_ls_R_factor_gt            0.0424
_refine_ls_wR_factor_ref          0.1064
_refine_ls_wR_factor_gt           0.0987
_refine_ls_goodness_of_fit_ref    1.021
_refine_ls_restrained_S_all       1.021
_refine_ls_shift/su_max           0.016
_refine_ls_shift/su_mean          0.003
 
loop_
 _atom_site_label
 _atom_site_type_symbol
 _atom_site_fract_x
 _atom_site_fract_y
 _atom_site_fract_z
 _atom_site_U_iso_or_equiv
 _atom_site_adp_type
 _atom_site_occupancy
 _atom_site_symmetry_multiplicity
 _atom_site_calc_flag
 _atom_site_refinement_flags
 _atom_site_disorder_assembly
 _atom_site_disorder_group
C1 C 0.09982(7) 0.20633(12) 0.17599(8) 0.0234(3) Uani 1 1 d . . .
H1 H 0.0913 0.2981 0.1515 0.028 Uiso 1 1 calc R . .
C2 C 0.15262(8) 0.13412(12) 0.14837(8) 0.0263(3) Uani 1 1 d . . .
H2A H 0.1850 0.0660 0.1939 0.032 Uiso 1 1 calc R . .
H2B H 0.1172 0.0885 0.0905 0.032 Uiso 1 1 calc R . .
C3 C 0.20937(8) 0.22624(14) 0.13862(8) 0.0293(3) Uani 1 1 d . . .
H3A H 0.2498 0.1723 0.1348 0.035 Uiso 1 1 calc R . .
H3B H 0.2387 0.2818 0.1931 0.035 Uiso 1 1 calc R . .
C4 C 0.16652(8) 0.31627(13) 0.05632(8) 0.0290(3) Uani 1 1 d . . .
H4A H 0.1216 0.3617 0.0562 0.035 Uiso 1 1 calc R . .
H4B H 0.2050 0.3847 0.0615 0.035 Uiso 1 1 calc R . .
C5 C 0.13298(8) 0.24446(13) -0.03300(9) 0.0304(3) Uani 1 1 d . . .
H5A H 0.1788 0.2109 -0.0365 0.036 Uiso 1 1 calc R . .
H5B H 0.1017 0.1670 -0.0337 0.036 Uiso 1 1 calc R . .
C6 C 0.07897(8) 0.32788(15) -0.11653(9) 0.0350(3) Uani 1 1 d . . .
H6A H 0.0655 0.2755 -0.1703 0.042 Uiso 1 1 calc R . .
H6B H 0.1098 0.4064 -0.1153 0.042 Uiso 1 1 calc R . .
C7 C 0.00044(8) 0.37438(14) -0.12575(9) 0.0350(3) Uani 1 1 d . . .
H7A H 0.0137 0.4214 -0.0701 0.042 Uiso 1 1 calc R . .
H7B H -0.0261 0.4384 -0.1758 0.042 Uiso 1 1 calc R . .
C8 C -0.05935(8) 0.26381(15) -0.14281(9) 0.0345(3) Uani 1 1 d . . .
H8A H -0.0943 0.2496 -0.2083 0.041 Uiso 1 1 calc R . .
H8B H -0.0288 0.1812 -0.1159 0.041 Uiso 1 1 calc R . .
C9 C -0.11284(8) 0.29043(16) -0.10512(9) 0.0348(3) Uani 1 1 d . . .
H9A H -0.1560 0.2229 -0.1288 0.042 Uiso 1 1 calc R . .
H9B H -0.1390 0.3776 -0.1269 0.042 Uiso 1 1 calc R . .
C10 C -0.06755(8) 0.28905(13) -0.00239(9) 0.0300(3) Uani 1 1 d . . .
H10A H -0.0203 0.3485 0.0217 0.036 Uiso 1 1 calc R . .
H10B H -0.1035 0.3243 0.0167 0.036 Uiso 1 1 calc R . .
C11 C -0.03877(8) 0.15197(13) 0.03804(8) 0.0299(3) Uani 1 1 d . . .
H11A H -0.0095 0.1122 0.0118 0.036 Uiso 1 1 calc R . .
H11B H -0.0868 0.0964 0.0198 0.036 Uiso 1 1 calc R . .
C12 C 0.01617(8) 0.14654(13) 0.14048(8) 0.0291(3) Uani 1 1 d . . .
H12A H 0.0226 0.0533 0.1601 0.035 Uiso 1 1 calc R . .
H12B H -0.0102 0.1945 0.1673 0.035 Uiso 1 1 calc R . .
C13 C 0.16294(7) 0.11274(12) 0.33438(8) 0.0241(3) Uani 1 1 d . . .
C14 C 0.20976(7) 0.17144(11) 0.42642(8) 0.0218(3) Uani 1 1 d . . .
C15 C 0.21736(7) 0.30620(12) 0.41759(8) 0.0210(3) Uani 1 1 d . . .
C16 C 0.17577(7) 0.33735(12) 0.31978(8) 0.0224(3) Uani 1 1 d . . .
C17 C 0.24205(7) 0.11026(12) 0.50916(7) 0.0222(3) Uani 1 1 d . . .
H17 H 0.2367 0.0182 0.5152 0.027 Uiso 1 1 calc R . .
N1 N 0.14400(6) 0.21787(10) 0.27476(6) 0.0233(2) Uani 1 1 d . . .
O1 O 0.14533(6) -0.00168(9) 0.31473(6) 0.0338(2) Uani 1 1 d . . .
O2 O 0.17012(5) 0.44307(8) 0.28514(5) 0.0304(2) Uani 1 1 d . . .
 
loop_
 _atom_site_aniso_label
 _atom_site_aniso_U_11
 _atom_site_aniso_U_22
 _atom_site_aniso_U_33
 _atom_site_aniso_U_23
 _atom_site_aniso_U_13
 _atom_site_aniso_U_12
C1 0.0242(6) 0.0272(6) 0.0138(6) -0.0008(5) 0.0067(5) -0.0003(5)
C2 0.0288(7) 0.0280(7) 0.0192(6) 0.0008(5) 0.0107(5) 0.0039(5)
C3 0.0216(7) 0.0404(8) 0.0202(6) -0.0022(5) 0.0071(5) 0.0010(6)
C4 0.0265(7) 0.0333(7) 0.0266(7) -0.0002(5) 0.0137(6) -0.0040(6)
C5 0.0273(7) 0.0400(8) 0.0257(7) 0.0016(6) 0.0153(6) 0.0025(6)
C6 0.0320(8) 0.0469(9) 0.0256(7) 0.0061(6) 0.0149(6) -0.0024(6)
C7 0.0314(7) 0.0380(8) 0.0289(7) 0.0083(6) 0.0113(6) 0.0032(6)
C8 0.0292(7) 0.0479(9) 0.0227(7) -0.0055(6) 0.0112(6) -0.0039(6)
C9 0.0240(7) 0.0487(9) 0.0251(7) 0.0009(6) 0.0085(6) 0.0029(6)
C10 0.0260(7) 0.0367(7) 0.0252(7) -0.0044(6) 0.0121(6) 0.0043(6)
C11 0.0246(7) 0.0350(7) 0.0223(6) -0.0063(5) 0.0071(5) -0.0017(6)
C12 0.0270(7) 0.0325(7) 0.0228(7) -0.0013(5) 0.0098(6) -0.0026(6)
C13 0.0242(6) 0.0260(6) 0.0190(6) -0.0002(5) 0.0092(5) 0.0011(5)
C14 0.0207(6) 0.0238(6) 0.0192(6) -0.0027(5) 0.0095(5) 0.0000(5)
C15 0.0189(6) 0.0253(6) 0.0179(6) 0.0003(5) 0.0090(5) 0.0022(5)
C16 0.0202(6) 0.0255(6) 0.0193(6) -0.0017(5) 0.0091(5) 0.0009(5)
C17 0.0232(6) 0.0223(6) 0.0192(6) -0.0010(5) 0.0100(5) -0.0006(5)
N1 0.0247(5) 0.0254(5) 0.0150(5) -0.0011(4) 0.0073(4) -0.0002(4)
O1 0.0440(6) 0.0248(5) 0.0228(5) -0.0029(4) 0.0110(4) -0.0036(4)
O2 0.0365(6) 0.0266(5) 0.0213(5) 0.0025(4) 0.0106(4) -0.0001(4)
 
_geom_special_details
;
 All esds (except the esd in the dihedral angle between two l.s. planes)
 are estimated using the full covariance matrix.  The cell esds are taken
 into account individually in the estimation of esds in distances, angles
 and torsion angles; correlations between esds in cell parameters are only
 used when they are defined by crystal symmetry.  An approximate (isotropic)
 treatment of cell esds is used for estimating esds involving l.s. planes.
;
 
loop_
 _geom_bond_atom_site_label_1
 _geom_bond_atom_site_label_2
 _geom_bond_distance
 _geom_bond_site_symmetry_2
 _geom_bond_publ_flag
C1 N1 1.4774(15) . ?
C1 C12 1.5317(18) . ?
C1 C2 1.5371(17) . ?
C1 H1 1.0000 . ?
C2 C3 1.5259(18) . ?
C2 H2A 0.9900 . ?
C2 H2B 0.9900 . ?
C3 C4 1.5298(18) . ?
C3 H3A 0.9900 . ?
C3 H3B 0.9900 . ?
C4 C5 1.5266(18) . ?
C4 H4A 0.9900 . ?
C4 H4B 0.9900 . ?
C5 C6 1.5297(18) . ?
C5 H5A 0.9900 . ?
C5 H5B 0.9900 . ?
C6 C7 1.529(2) . ?
C6 H6A 0.9900 . ?
C6 H6B 0.9900 . ?
C7 C8 1.528(2) . ?
C7 H7A 0.9900 . ?
C7 H7B 0.9900 . ?
C8 C9 1.5278(19) . ?
C8 H8A 0.9900 . ?
C8 H8B 0.9900 . ?
C9 C10 1.5325(18) . ?
C9 H9A 0.9900 . ?
C9 H9B 0.9900 . ?
C10 C11 1.5244(19) . ?
C10 H10A 0.9900 . ?
C10 H10B 0.9900 . ?
C11 C12 1.5323(17) . ?
C11 H11A 0.9900 . ?
C11 H11B 0.9900 . ?
C12 H12A 0.9900 . ?
C12 H12B 0.9900 . ?
C13 O1 1.2056(15) . ?
C13 N1 1.3987(15) . ?
C13 C14 1.4960(16) . ?
C14 C17 1.3866(16) . ?
C14 C15 1.3900(17) . ?
C15 C17 1.3853(16) 7_556 ?
C15 C16 1.4944(16) . ?
C16 O2 1.2069(14) . ?
C16 N1 1.3979(15) . ?
C17 C15 1.3853(16) 7_556 ?
C17 H17 0.9500 . ?
 
loop_
 _geom_angle_atom_site_label_1
 _geom_angle_atom_site_label_2
 _geom_angle_atom_site_label_3
 _geom_angle
 _geom_angle_site_symmetry_1
 _geom_angle_site_symmetry_3
 _geom_angle_publ_flag
N1 C1 C12 110.10(10) . . ?
N1 C1 C2 109.61(9) . . ?
C12 C1 C2 115.64(10) . . ?
N1 C1 H1 107.0 . . ?
C12 C1 H1 107.0 . . ?
C2 C1 H1 107.0 . . ?
C3 C2 C1 113.15(10) . . ?
C3 C2 H2A 108.9 . . ?
C1 C2 H2A 108.9 . . ?
C3 C2 H2B 108.9 . . ?
C1 C2 H2B 108.9 . . ?
H2A C2 H2B 107.8 . . ?
C2 C3 C4 113.80(10) . . ?
C2 C3 H3A 108.8 . . ?
C4 C3 H3A 108.8 . . ?
C2 C3 H3B 108.8 . . ?
C4 C3 H3B 108.8 . . ?
H3A C3 H3B 107.7 . . ?
C5 C4 C3 114.19(11) . . ?
C5 C4 H4A 108.7 . . ?
C3 C4 H4A 108.7 . . ?
C5 C4 H4B 108.7 . . ?
C3 C4 H4B 108.7 . . ?
H4A C4 H4B 107.6 . . ?
C6 C5 C4 115.19(12) . . ?
C6 C5 H5A 108.5 . . ?
C4 C5 H5A 108.5 . . ?
C6 C5 H5B 108.5 . . ?
C4 C5 H5B 108.5 . . ?
H5A C5 H5B 107.5 . . ?
C5 C6 C7 114.55(11) . . ?
C5 C6 H6A 108.6 . . ?
C7 C6 H6A 108.6 . . ?
C5 C6 H6B 108.6 . . ?
C7 C6 H6B 108.6 . . ?
H6A C6 H6B 107.6 . . ?
C8 C7 C6 114.51(12) . . ?
C8 C7 H7A 108.6 . . ?
C6 C7 H7A 108.6 . . ?
C8 C7 H7B 108.6 . . ?
C6 C7 H7B 108.6 . . ?
H7A C7 H7B 107.6 . . ?
C9 C8 C7 114.37(12) . . ?
C9 C8 H8A 108.7 . . ?
C7 C8 H8A 108.7 . . ?
C9 C8 H8B 108.7 . . ?
C7 C8 H8B 108.7 . . ?
H8A C8 H8B 107.6 . . ?
C8 C9 C10 114.04(11) . . ?
C8 C9 H9A 108.7 . . ?
C10 C9 H9A 108.7 . . ?
C8 C9 H9B 108.7 . . ?
C10 C9 H9B 108.7 . . ?
H9A C9 H9B 107.6 . . ?
C11 C10 C9 113.42(11) . . ?
C11 C10 H10A 108.9 . . ?
C9 C10 H10A 108.9 . . ?
C11 C10 H10B 108.9 . . ?
C9 C10 H10B 108.9 . . ?
H10A C10 H10B 107.7 . . ?
C10 C11 C12 115.85(11) . . ?
C10 C11 H11A 108.3 . . ?
C12 C11 H11A 108.3 . . ?
C10 C11 H11B 108.3 . . ?
C12 C11 H11B 108.3 . . ?
H11A C11 H11B 107.4 . . ?
C11 C12 C1 113.40(11) . . ?
C11 C12 H12A 108.9 . . ?
C1 C12 H12A 108.9 . . ?
C11 C12 H12B 108.9 . . ?
C1 C12 H12B 108.9 . . ?
H12A C12 H12B 107.7 . . ?
O1 C13 N1 126.48(11) . . ?
O1 C13 C14 127.57(11) . . ?
N1 C13 C14 105.95(10) . . ?
C17 C14 C15 122.63(10) . . ?
C17 C14 C13 129.33(11) . . ?
C15 C14 C13 108.04(10) . . ?
C17 C15 C14 122.55(11) 7_556 . ?
C17 C15 C16 129.37(11) 7_556 . ?
C14 C15 C16 108.07(10) . . ?
O2 C16 N1 125.98(11) . . ?
O2 C16 C15 127.99(11) . . ?
N1 C16 C15 106.03(10) . . ?
C14 C17 C15 114.82(11) . 7_556 ?
C14 C17 H17 122.6 . . ?
C15 C17 H17 122.6 7_556 . ?
C16 N1 C13 111.89(10) . . ?
C16 N1 C1 122.76(10) . . ?
C13 N1 C1 125.27(10) . . ?
 
loop_
 _geom_torsion_atom_site_label_1
 _geom_torsion_atom_site_label_2
 _geom_torsion_atom_site_label_3
 _geom_torsion_atom_site_label_4
 _geom_torsion
 _geom_torsion_site_symmetry_1
 _geom_torsion_site_symmetry_2
 _geom_torsion_site_symmetry_3
 _geom_torsion_site_symmetry_4
 _geom_torsion_publ_flag
N1 C1 C2 C3 -86.28(12) . . . . ?
C12 C1 C2 C3 148.57(11) . . . . ?
C1 C2 C3 C4 -71.51(13) . . . . ?
C2 C3 C4 C5 -70.16(14) . . . . ?
C3 C4 C5 C6 171.08(11) . . . . ?
C4 C5 C6 C7 -64.55(16) . . . . ?
C5 C6 C7 C8 -67.17(16) . . . . ?
C6 C7 C8 C9 149.62(12) . . . . ?
C7 C8 C9 C10 -69.06(16) . . . . ?
C8 C9 C10 C11 -69.83(16) . . . . ?
C9 C10 C11 C12 172.40(11) . . . . ?
C10 C11 C12 C1 -69.27(15) . . . . ?
N1 C1 C12 C11 170.54(10) . . . . ?
C2 C1 C12 C11 -64.56(14) . . . . ?
O1 C13 C14 C17 -1.3(2) . . . . ?
N1 C13 C14 C17 179.24(12) . . . . ?
O1 C13 C14 C15 178.65(13) . . . . ?
N1 C13 C14 C15 -0.77(13) . . . . ?
C17 C14 C15 C17 0.1(2) . . . 7_556 ?
C13 C14 C15 C17 -179.85(11) . . . 7_556 ?
C17 C14 C15 C16 179.90(10) . . . . ?
C13 C14 C15 C16 -0.09(13) . . . . ?
C17 C15 C16 O2 0.8(2) 7_556 . . . ?
C14 C15 C16 O2 -178.93(12) . . . . ?
C17 C15 C16 N1 -179.35(12) 7_556 . . . ?
C14 C15 C16 N1 0.92(13) . . . . ?
C15 C14 C17 C15 -0.13(18) . . . 7_556 ?
C13 C14 C17 C15 179.85(12) . . . 7_556 ?
O2 C16 N1 C13 178.39(12) . . . . ?
C15 C16 N1 C13 -1.46(14) . . . . ?
O2 C16 N1 C1 1.5(2) . . . . ?
C15 C16 N1 C1 -178.34(10) . . . . ?
O1 C13 N1 C16 -178.02(13) . . . . ?
C14 C13 N1 C16 1.41(13) . . . . ?
O1 C13 N1 C1 -1.2(2) . . . . ?
C14 C13 N1 C1 178.19(10) . . . . ?
C12 C1 N1 C16 -124.29(12) . . . . ?
C2 C1 N1 C16 107.43(13) . . . . ?
C12 C1 N1 C13 59.26(15) . . . . ?
C2 C1 N1 C13 -69.02(15) . . . . ?
 
_diffrn_measured_fraction_theta_max    0.999
_diffrn_reflns_theta_full              28.00
_diffrn_measured_fraction_theta_full   0.999
_refine_diff_density_max    0.291
_refine_diff_density_min   -0.219
_refine_diff_density_rms    0.042

_iucr_refine_instructions_details
;
TITL 11s_sk19_pmdi12_0s in C2/c
CELL  0.71073  19.5309  10.1243  17.5617   90.000  121.951   90.000
ZERR     8.00   0.0007   0.0004   0.0006    0.000    0.001    0.000
LATT   7
SYMM  - X,   Y, 1/2 - Z
SFAC  C    H    N    O
UNIT  136  192  8    16
MERG   2
OMIT    -2.00  56.00
FMAP   2
PLAN   20
SIZE     0.10   0.22   0.49
ACTA
BOND   $H
CONF
L.S.   4
TEMP  -100.00
WGHT    0.051700    0.299600
FVAR       0.15468
C1    1    0.099820    0.206330    0.175992    11.00000    0.02419    0.02721 =
         0.01382   -0.00080    0.00665   -0.00034
AFIX  13
H1    2    0.091276    0.298073    0.151469    11.00000   -1.20000
AFIX   0
C2    1    0.152622    0.134120    0.148373    11.00000    0.02880    0.02799 =
         0.01922    0.00077    0.01074    0.00385
AFIX  23
H2A   2    0.185024    0.066034    0.193944    11.00000   -1.20000
H2B   2    0.117211    0.088471    0.090536    11.00000   -1.20000
AFIX   0
C3    1    0.209372    0.226235    0.138622    11.00000    0.02160    0.04036 =
         0.02022   -0.00216    0.00713    0.00098
AFIX  23
H3A   2    0.249760    0.172305    0.134846    11.00000   -1.20000
H3B   2    0.238731    0.281785    0.193113    11.00000   -1.20000
AFIX   0
C4    1    0.166518    0.316265    0.056316    11.00000    0.02648    0.03326 =
         0.02660   -0.00017    0.01367   -0.00398
AFIX  23
H4A   2    0.121564    0.361733    0.056152    11.00000   -1.20000
H4B   2    0.204971    0.384739    0.061543    11.00000   -1.20000
AFIX   0
C5    1    0.132976    0.244459   -0.033000    11.00000    0.02727    0.04002 =
         0.02566    0.00158    0.01527    0.00247
AFIX  23
H5A   2    0.178844    0.210937   -0.036517    11.00000   -1.20000
H5B   2    0.101668    0.167030   -0.033747    11.00000   -1.20000
AFIX   0
C6    1    0.078974    0.327880   -0.116529    11.00000    0.03196    0.04686 =
         0.02563    0.00608    0.01489   -0.00236
AFIX  23
H6A   2    0.065535    0.275499   -0.170321    11.00000   -1.20000
H6B   2    0.109790    0.406357   -0.115289    11.00000   -1.20000
AFIX   0
C7    1    0.000442    0.374377   -0.125745    11.00000    0.03141    0.03800 =
         0.02887    0.00829    0.01130    0.00323
AFIX  23
H7A   2    0.013709    0.421403   -0.070123    11.00000   -1.20000
H7B   2   -0.026065    0.438441   -0.175816    11.00000   -1.20000
AFIX   0
C8    1   -0.059347    0.263814   -0.142807    11.00000    0.02918    0.04790 =
         0.02274   -0.00545    0.01115   -0.00389
AFIX  23
H8A   2   -0.094322    0.249575   -0.208349    11.00000   -1.20000
H8B   2   -0.028800    0.181214   -0.115920    11.00000   -1.20000
AFIX   0
C9    1   -0.112844    0.290433   -0.105120    11.00000    0.02396    0.04867 =
         0.02513    0.00093    0.00853    0.00292
AFIX  23
H9A   2   -0.156006    0.222892   -0.128827    11.00000   -1.20000
H9B   2   -0.139001    0.377645   -0.126900    11.00000   -1.20000
AFIX   0
C10   1   -0.067555    0.289052   -0.002386    11.00000    0.02596    0.03667 =
         0.02525   -0.00435    0.01213    0.00432
AFIX  23
H10A  2   -0.020279    0.348473    0.021667    11.00000   -1.20000
H10B  2   -0.103482    0.324324    0.016658    11.00000   -1.20000
AFIX   0
C11   1   -0.038771    0.151967    0.038040    11.00000    0.02458    0.03496 =
         0.02231   -0.00628    0.00711   -0.00170
AFIX  23
H11A  2   -0.009516    0.112247    0.011766    11.00000   -1.20000
H11B  2   -0.086756    0.096367    0.019802    11.00000   -1.20000
AFIX   0
C12   1    0.016173    0.146535    0.140483    11.00000    0.02702    0.03255 =
         0.02277   -0.00132    0.00982   -0.00257
AFIX  23
H12A  2    0.022599    0.053276    0.160094    11.00000   -1.20000
H12B  2   -0.010197    0.194511    0.167316    11.00000   -1.20000
AFIX   0
C13   1    0.162937    0.112735    0.334381    11.00000    0.02420    0.02597 =
         0.01902   -0.00019    0.00924    0.00108
C14   1    0.209758    0.171441    0.426425    11.00000    0.02068    0.02385 =
         0.01918   -0.00268    0.00945    0.00001
C15   1    0.217360    0.306205    0.417592    11.00000    0.01894    0.02526 =
         0.01788    0.00032    0.00903    0.00224
C16   1    0.175774    0.337354    0.319778    11.00000    0.02021    0.02555 =
         0.01935   -0.00170    0.00909    0.00094
C17   1    0.242046    0.110263    0.509162    11.00000    0.02324    0.02234 =
         0.01921   -0.00095    0.00999   -0.00057
AFIX  43
H17   2    0.236739    0.018180    0.515154    11.00000   -1.20000
AFIX   0
N1    3    0.143998    0.217875    0.274757    11.00000    0.02471    0.02539 =
         0.01501   -0.00114    0.00731   -0.00019
O1    4    0.145333   -0.001680    0.314730    11.00000    0.04401    0.02483 =
         0.02280   -0.00292    0.01099   -0.00358
O2    4    0.170120    0.443071    0.285142    11.00000    0.03648    0.02660 =
         0.02129    0.00254    0.01060   -0.00012
HKLF    4
 
REM  11s_sk19_pmdi12_0s in C2/c
REM R1 =  0.0424 for   2594 Fo > 4sig(Fo)  and  0.0621 for all   3567 data
REM    181 parameters refined using      0 restraints
 
END
 
WGHT      0.0523      0.0000
REM Highest difference peak  0.291,  deepest hole -0.219,  1-sigma level  0.042
Q1    1   0.2004  0.3285  0.3727  11.00000  0.05    0.29
Q2    1   0.1860  0.1300  0.3873  11.00000  0.05    0.27
Q3    1   0.1425  0.2919  0.0102  11.00000  0.05    0.22
Q4    1   0.1273  0.2105  0.2295  11.00000  0.05    0.22
Q5    1   0.2054  0.2452  0.4286  11.00000  0.05    0.21
Q6    1  -0.0117  0.1535  0.0904  11.00000  0.05    0.20
Q7    1   0.1450  0.1644  0.3006  11.00000  0.05    0.20
Q8    1  -0.0888  0.2889 -0.0555  11.00000  0.05    0.19
Q9    1   0.1265  0.1852  0.1639  11.00000  0.05    0.19
Q10   1   0.1824  0.2939  0.1092  11.00000  0.05    0.18
Q11   1   0.1466  0.2753  0.3007  11.00000  0.05    0.17
Q12   1   0.1021  0.3084 -0.0634  11.00000  0.05    0.17
Q13   1   0.1540  0.4529  0.2297  11.00000  0.05    0.17
Q14   1   0.2149  0.3435  0.4434  11.00000  0.05    0.16
Q15   1   0.1813  0.2611  0.2989  11.00000  0.05    0.16
Q16   1   0.2314  0.1301  0.4606  11.00000  0.05    0.16
Q17   1   0.0600  0.1643  0.1624  11.00000  0.05    0.16
Q18   1   0.1820  0.1861  0.1504  11.00000  0.05    0.15
Q19   1   0.1362 -0.0282  0.2582  11.00000  0.05    0.15
Q20   1  -0.0828  0.1675 -0.2036  11.00000  0.05    0.15
;
