# Supplementary material
Source: publisher figshare collection journal article supplement (https://acs.figshare.com/ndownloader/files/4106071)
Supplement: Supplementary file 2 [file 4106071 › polyII-11s_sk19_pmdi12_0s.fcf]

#
# h,k,l, Fc-squared, Fo-squared, sigma(Fo-squared) and status flag
#
data_polyII_11s_sk19_pmdi12_0s
_shelx_title ' 11s_sk19_pmdi12_0s in C2/c'
_shelx_refln_list_code          4
_shelx_F_calc_maximum      326.69
_exptl_crystal_F_000      1192.00
_reflns_d_resolution_high  0.7570
 
loop_
 _symmetry_equiv_pos_as_xyz
 'x, y, z'
 '-x, y, -z+1/2'
 'x+1/2, y+1/2, z'
 '-x+1/2, y+1/2, -z+1/2'
 '-x, -y, -z'
 'x, -y, z-1/2'
 '-x+1/2, -y+1/2, -z'
 'x+1/2, -y+1/2, z-1/2'
 
_cell_length_a    19.5309
_cell_length_b    10.1243
_cell_length_c    17.5617
_cell_angle_alpha  90.000
_cell_angle_beta  121.951
_cell_angle_gamma  90.000
 
_shelx_F_squared_multiplier     1.000
 
loop_
 _refln_index_h
 _refln_index_k
 _refln_index_l
 _refln_F_squared_calc
 _refln_F_squared_meas
 _refln_F_squared_sigma
 _refln_observed_status
   2   0   0     2428.64     2559.88     32.05 o
   4   0   0    11743.21    12416.17    206.20 o
   6   0   0    14612.18    15722.92    271.06 o
   8   0   0      227.83      247.42     17.06 o
  10   0   0     1401.18     1381.04     61.69 o
  12   0   0     1461.48     1589.63     61.25 o
  14   0   0     1140.51     1229.03     44.72 o
  16   0   0      492.14      488.28     47.89 o
  18   0   0      621.10      684.78     59.05 o
  20   0   0       14.88        3.76     45.14 o
   1   1   0      768.78      741.82      6.61 o
   3   1   0     1087.32     1197.26     10.67 o
   5   1   0       21.86       28.56      3.51 o
   7   1   0     1705.43     1760.38     34.10 o
   9   1   0      117.92      119.05      8.22 o
  11   1   0     3660.23     3803.22     59.25 o
  13   1   0       63.97       78.57     11.16 o
  15   1   0       14.19        4.51     10.88 o
  17   1   0     1101.76     1144.18     48.82 o
  19   1   0        6.30       -0.30     22.78 o
  21   1   0      167.26      150.13     59.14 o
   0   2   0   106727.52   107436.27   1241.74 o
   2   2   0      777.58      775.72      9.85 o
   4   2   0     1556.26     1425.12     13.53 o
   6   2   0     6876.15     7442.73     93.86 o
   8   2   0      570.74      664.19     24.09 o
  10   2   0      915.20     1008.18     27.57 o
  12   2   0     1249.58     1414.90     23.51 o
  14   2   0      849.92      821.58     32.31 o
  16   2   0        6.44       -6.81     11.37 o
  18   2   0      153.40      108.40     30.62 o
  20   2   0        2.22       20.15     24.73 o
   1   3   0      357.80      355.62     10.21 o
   3   3   0      871.04      935.29     13.95 o
   5   3   0     2716.16     2996.29     50.39 o
   7   3   0      314.18      384.56     11.79 o
   9   3   0      163.32      184.41      7.50 o
  11   3   0      389.87      424.70     21.45 o
  13   3   0      499.55      459.22     32.30 o
  15   3   0      325.51      312.34     28.70 o
  17   3   0     1057.42     1036.77     49.14 o
  19   3   0       88.13       86.93     30.39 o
  21   3   0      117.58      125.15     36.33 o
   0   4   0       94.54       79.82     20.49 o
   2   4   0      678.00      680.42     16.03 o
   4   4   0    12481.24    13364.13    156.38 o
   6   4   0     2487.06     2538.76     40.01 o
   8   4   0      101.19      112.09      9.04 o
  10   4   0      233.03      215.61     22.25 o
  12   4   0     2490.26     2657.39     61.85 o
  14   4   0      971.94     1030.87     46.18 o
  16   4   0       58.89       31.25     16.35 o
  18   4   0       43.75       41.20     21.16 o
  20   4   0        0.49       -9.14     23.35 o
   1   5   0        6.21        6.10      5.87 o
   3   5   0       54.66       49.70      7.93 o
   5   5   0      160.49      162.85      9.37 o
   7   5   0     2962.80     3155.30     49.70 o
   9   5   0     1062.41     1023.55     29.71 o
  11   5   0       88.25      111.98     20.01 o
  13   5   0      156.63      159.15     23.68 o
  15   5   0      568.26      630.01     41.15 o
  17   5   0     1019.24      990.19     52.44 o
  19   5   0       55.88       92.55     25.70 o
   0   6   0     2131.57     2332.86     55.23 o
   2   6   0        8.01        2.09      6.41 o
   4   6   0       86.54       95.29     10.48 o
   6   6   0      522.48      531.90     13.69 o
   8   6   0      115.23      129.51     15.07 o
  10   6   0      107.03      114.38     14.52 o
  12   6   0       19.76       -1.61     13.51 o
  14   6   0        2.93        3.11     14.51 o
  16   6   0      535.46      511.40     40.43 o
  18   6   0        3.73      -11.12     17.22 o
   1   7   0     1681.87     1774.90     37.33 o
   3   7   0       80.56      134.73     13.32 o
   5   7   0      117.80      119.90     12.48 o
   7   7   0        6.61       14.43      5.88 o
   9   7   0      836.00      863.71     32.99 o
  11   7   0      443.12      367.64     32.08 o
  13   7   0       59.48       46.05     19.42 o
  15   7   0       91.74       75.18     22.86 o
  17   7   0       17.44       16.52     19.28 o
   0   8   0       71.25       72.50     17.45 o
   2   8   0      332.35      312.69     18.57 o
   4   8   0        0.38        9.61      8.83 o
   6   8   0      394.80      420.30     20.78 o
   8   8   0     1737.97     1738.38     48.41 o
  10   8   0     1125.91     1112.45     50.78 o
  12   8   0        0.00      -10.47     13.81 o
  14   8   0      266.77      272.67     33.34 o
  16   8   0      167.62      147.14     30.13 o
   1   9   0      366.49      288.63     56.94 o
   3   9   0     6004.22     6036.52    104.08 o
   5   9   0       18.46        9.14     11.78 o
   7   9   0     1010.10      941.83     39.33 o
   9   9   0      803.80      785.13     45.10 o
  11   9   0        7.76        4.63     16.36 o
  13   9   0      555.74      460.04     40.97 o
  15   9   0      501.72      590.49     47.90 o
   0  10   0      121.29      105.13     23.90 o
   2  10   0      381.60      352.29     22.36 o
   4  10   0      195.81      224.00     23.63 o
   6  10   0      604.16      702.23     36.65 o
   8  10   0      237.30      262.66     31.30 o
  10  10   0        0.25      -10.22     14.10 o
  12  10   0       17.25       14.72     19.73 o
  14  10   0       57.98       65.50     25.00 o
   1  11   0       17.41       33.24     12.76 o
   3  11   0       45.83       44.24     16.51 o
   5  11   0       20.92       13.98     15.02 o
   7  11   0        7.98        4.91     16.52 o
   9  11   0        0.01        0.20     16.59 o
  11  11   0       15.79       22.63     19.79 o
   0  12   0       73.01       97.33     29.27 o
   2  12   0       13.00       16.68     14.19 o
   4  12   0        0.28       -3.99     14.89 o
   6  12   0       15.51       27.89     19.61 o
   8  12   0       98.59      117.31     28.14 o
   1  13   0      125.97      173.14     32.01 o
   3  13   0        2.76       -7.44     16.20 o
   5  13   0       96.15      141.25     30.84 o
 -21   1   1        0.69       -0.01     23.42 o
 -19   1   1      536.46      577.07     48.87 o
 -17   1   1     1643.82     1566.30     64.61 o
 -15   1   1     2206.28     2119.75     71.66 o
 -13   1   1       42.15       44.55      8.98 o
 -11   1   1        9.63        5.71      4.94 o
  -9   1   1      134.66      140.76      8.19 o
  -7   1   1     3197.53     3423.25     71.09 o
  -5   1   1    54817.45    55797.89    773.69 o
  -3   1   1    44117.09    43360.55    421.14 o
  -1   1   1    10695.39     8948.55    762.18 o
   1   1   1      465.54      467.33      6.32 o
   3   1   1    25082.26    24893.00    222.12 o
   5   1   1       16.50       24.71      4.37 o
   7   1   1      337.53      340.86     11.21 o
   9   1   1       33.26       16.52      6.80 o
  11   1   1        1.73       -3.15      6.75 o
  13   1   1      922.43      847.74     26.66 o
  15   1   1       41.97       44.49     14.18 o
  17   1   1      150.29      137.72     23.98 o
  19   1   1       17.66       20.31     24.98 o
  21   1   1       94.50       81.13     43.99 o
 -22   2   1      336.35      367.45     48.32 o
 -20   2   1       29.79        9.40     24.27 o
 -18   2   1      169.23      137.91     30.97 o
 -16   2   1      410.78      407.13     26.07 o
 -14   2   1     1475.55     1403.23     39.88 o
 -12   2   1       98.09       86.70     13.55 o
 -10   2   1       40.13       61.40     10.53 o
  -8   2   1     3225.24     3287.22     49.65 o
  -6   2   1     2396.58     2494.55     30.78 o
  -4   2   1        0.75        9.23      3.01 o
  -2   2   1     9652.33     9538.02     77.06 o
   0   2   1    23761.22    23117.64    195.52 o
   2   2   1     8999.53     8923.17     81.13 o
   4   2   1        5.21        8.28      3.61 o
   6   2   1      650.93      706.38     11.40 o
   8   2   1     1771.70     1820.64     26.78 o
  10   2   1      136.45      136.75      9.34 o
  12   2   1      127.93      134.12     10.72 o
  14   2   1      487.17      472.79     22.07 o
  16   2   1        4.65      -13.58     13.58 o
  18   2   1       13.08       14.53     22.81 o
  20   2   1      989.73     1093.87     68.98 o
 -21   3   1      526.76      599.10     56.26 o
 -19   3   1      330.00      317.60     41.27 o
 -17   3   1      508.46      497.94     36.13 o
 -15   3   1      534.38      598.28     24.85 o
 -13   3   1      296.09      352.42     20.09 o
 -11   3   1       20.01       26.18      9.97 o
  -9   3   1     2252.20     2328.24     39.49 o
  -7   3   1        9.57        7.73      3.22 o
  -5   3   1      604.12      673.72     12.21 o
  -3   3   1     8092.35     8475.85     95.99 o
  -1   3   1     6697.32     6279.90     70.67 o
   1   3   1       93.55       97.95      5.73 o
   3   3   1      325.66      376.48     11.15 o
   5   3   1      451.12      425.50     14.66 o
   7   3   1      308.06      282.24     12.90 o
   9   3   1     6252.16     6741.43    119.25 o
  11   3   1      312.41      321.29     11.02 o
  13   3   1      420.75      396.59     17.94 o
  15   3   1      102.43      104.89     21.63 o
  17   3   1      373.58      384.25     34.05 o
  19   3   1      114.39      100.86     31.84 o
 -20   4   1        1.42       -6.24     24.11 o
 -18   4   1      266.50      294.25     32.11 o
 -16   4   1       12.65        3.84     14.14 o
 -14   4   1      163.80      168.69     23.07 o
 -12   4   1       18.70       14.71      9.80 o
 -10   4   1      210.54      208.32     12.65 o
  -8   4   1     1927.59     2131.85     26.80 o
  -6   4   1        2.39        1.80      3.94 o
  -4   4   1     3397.77     3738.02     71.50 o
  -2   4   1       35.77       41.25      6.97 o
   0   4   1     8737.01     9102.59     80.59 o
   2   4   1      786.83      771.12     16.09 o
   4   4   1      404.96      469.18     14.91 o
   6   4   1      121.46      107.11     11.70 o
   8   4   1      935.28      969.41     31.07 o
  10   4   1      440.37      395.65     15.75 o
  12   4   1        1.24        0.12     13.64 o
  14   4   1       30.15        2.19     14.10 o
  16   4   1       87.70       79.31     19.75 o
  18   4   1       49.91       71.06     23.66 o
  20   4   1      458.40      540.71     55.20 o
 -19   5   1      136.02      160.24     29.44 o
 -17   5   1        4.89       18.53     17.58 o
 -15   5   1      150.38      105.01     21.86 o
 -13   5   1      535.34      427.96     32.34 o
 -11   5   1      441.17      459.63     30.85 o
  -9   5   1        1.90        2.53      4.22 o
  -7   5   1       12.87       10.24      5.38 o
  -5   5   1      144.08      163.53     11.32 o
  -3   5   1      411.49      567.56     17.49 o
  -1   5   1     1460.94     1491.40     32.03 o
   1   5   1       15.12       54.16      8.33 o
   3   5   1     2071.47     2286.20     35.38 o
   5   5   1       16.09        2.95      5.51 o
   7   5   1        0.57        3.28      8.39 o
   9   5   1      420.11      441.46     22.16 o
  11   5   1     1528.37     1433.35     51.66 o
  13   5   1       88.25       78.61     19.97 o
  15   5   1        0.19      -14.23     15.03 o
  17   5   1      135.91      147.51     28.16 o
  19   5   1      178.81      146.54     30.53 o
 -20   6   1        5.50        2.36     19.19 o
 -18   6   1      218.81      227.20     32.12 o
 -16   6   1      300.73      342.28     34.49 o
 -14   6   1       76.25       59.88     19.68 o
 -12   6   1      574.38      591.33     36.50 o
 -10   6   1       24.77       23.71     10.10 o
  -8   6   1     1577.61     1715.99     48.28 o
  -6   6   1     6470.50     6572.39    114.22 o
  -4   6   1     1235.62     1278.29     29.20 o
  -2   6   1      792.17      783.21     23.78 o
   0   6   1      262.86      222.20     14.30 o
   2   6   1     2179.96     2124.53     34.67 o
   4   6   1       44.20       54.60      7.68 o
   6   6   1     1166.37     1161.69     25.95 o
   8   6   1      582.35      506.09     25.13 o
  10   6   1      572.94      555.19     26.32 o
  12   6   1     1226.83     1159.06     50.49 o
  14   6   1       52.18       51.09     20.33 o
  16   6   1       41.52       19.28     19.59 o
  18   6   1      103.87       91.89     27.00 o
 -19   7   1        5.84       -6.26     20.33 o
 -17   7   1       96.07      116.79     26.96 o
 -15   7   1       65.51      112.26     25.36 o
 -13   7   1     1484.43     1309.53     55.28 o
 -11   7   1     2346.26     2241.62     79.51 o
  -9   7   1        0.86        4.55     10.00 o
  -7   7   1        6.23        7.35      7.51 o
  -5   7   1      196.72      183.21     14.60 o
  -3   7   1      144.56      172.13     13.74 o
  -1   7   1      723.09      739.53     25.40 o
   1   7   1      115.09       92.20     12.09 o
   3   7   1       29.84       17.15      8.26 o
   5   7   1      778.38      793.89     21.11 o
   7   7   1      108.05      120.13     15.32 o
   9   7   1       30.97       28.19     12.23 o
  11   7   1      815.08      772.36     42.79 o
  13   7   1      625.80      621.83     42.53 o
  15   7   1      106.50      103.93     24.89 o
  17   7   1      321.52      347.41     39.46 o
 -18   8   1      350.68      405.86     43.06 o
 -16   8   1       39.78       34.15     20.99 o
 -14   8   1      158.95      140.64     26.73 o
 -12   8   1       92.28       80.78     21.84 o
 -10   8   1       99.45       89.59     20.52 o
  -8   8   1      313.84      352.88     24.86 o
  -6   8   1       23.81       24.03      9.73 o
  -4   8   1     3129.67     2984.90     67.42 o
  -2   8   1     1475.57     1410.86     36.44 o
   0   8   1     1316.04     1057.89    162.33 o
   2   8   1       29.08       16.01      8.90 o
   4   8   1      229.09      196.81     15.96 o
   6   8   1      784.57      730.52     26.11 o
   8   8   1      816.13      794.80     34.72 o
  10   8   1        0.03       -1.33     13.25 o
  12   8   1        0.16        0.94     14.30 o
  14   8   1      586.71      551.77     43.51 o
  16   8   1       10.51       16.28     20.80 o
 -15   9   1      257.59      262.63     35.84 o
 -13   9   1      207.79      208.28     31.22 o
 -11   9   1       78.96       67.39     20.24 o
  -9   9   1      169.23      148.13     24.58 o
  -7   9   1      339.26      325.74     25.76 o
  -5   9   1       54.98       81.53     14.00 o
  -3   9   1       86.64       70.76     12.65 o
  -1   9   1      315.66      264.96     20.18 o
   1   9   1      108.95       93.05     13.78 o
   3   9   1        1.90       -8.80      8.80 o
   5   9   1        0.20       10.19     12.05 o
   7   9   1        0.34       -0.28     11.61 o
   9   9   1        0.72       -3.63     13.51 o
  11   9   1       70.67       56.56     20.77 o
  13   9   1      323.75      321.88     36.83 o
  15   9   1      102.26      107.29     28.90 o
 -14  10   1       56.73       39.41     22.52 o
 -12  10   1      164.45      171.48     29.89 o
 -10  10   1       27.24       24.61     17.82 o
  -8  10   1       31.83       24.85     17.45 o
  -6  10   1      422.57      450.24     30.93 o
  -4  10   1      331.60      323.45     23.23 o
  -2  10   1      672.35      644.17     40.34 o
   0  10   1     1622.77     1707.21     46.04 o
   2  10   1      184.01      150.77     18.17 o
   4  10   1       82.96       77.69     17.51 o
   6  10   1      992.66      874.72     40.66 o
   8  10   1       13.63       -4.11     14.14 o
  10  10   1      104.45       99.03     25.10 o
  12  10   1       38.44       25.94     20.05 o
 -13  11   1       15.97        4.34     19.88 o
 -11  11   1      343.79      395.72     41.21 o
  -9  11   1      131.04      139.97     27.87 o
  -7  11   1      387.29      394.77     38.19 o
  -5  11   1      175.80      197.05     24.93 o
  -3  11   1       34.05       23.28     14.45 o
  -1  11   1      148.42      141.27     19.44 o
   1  11   1       93.42       64.70     13.20 o
   3  11   1        5.04        5.12     12.96 o
   5  11   1      438.16      486.76     34.34 o
   7  11   1      125.96      131.24     27.14 o
   9  11   1       47.84       47.02     21.43 o
  11  11   1        0.23       -6.13     18.18 o
 -10  12   1       19.58       40.80     23.37 o
  -8  12   1        4.73       -0.93     18.40 o
  -6  12   1        3.95       -8.02     16.63 o
  -4  12   1      256.10      312.39     31.36 o
  -2  12   1       63.88       92.35     19.63 o
   0  12   1       62.51       75.18     18.63 o
   2  12   1      298.67      351.07     31.87 o
   4  12   1        3.10       -0.80     14.85 o
   6  12   1        1.47       22.37     19.21 o
   8  12   1      126.27      164.97     30.50 o
  -5  13   1       82.99       79.58     25.74 o
  -3  13   1        4.55       19.17     18.23 o
  -1  13   1       63.01       59.96     19.89 o
   1  13   1      197.16      233.28     34.49 o
   3  13   1      431.21      558.43     41.43 o
 -22   0   2      446.95      418.80     91.95 o
 -20   0   2      100.31      174.60     62.07 o
 -18   0   2       13.57       44.99     27.60 o
 -16   0   2       74.49       72.68     17.26 o
 -14   0   2       43.96       46.81     40.96 o
 -12   0   2       52.98       60.91     14.51 o
 -10   0   2     2940.70     2944.99     88.27 o
  -8   0   2       55.79       35.65     18.18 o
  -6   0   2    27783.57    28270.53    534.09 o
  -4   0   2    59598.42    60736.63    673.44 o
  -2   0   2      375.96      360.42     15.70 o
   0   0   2     1346.32     1202.86     16.93 o
   2   0   2     1614.40     1696.85     21.66 o
   4   0   2      992.13     1007.06     41.42 o
   6   0   2    10942.13    10643.02    329.64 o
   8   0   2      903.63      844.65     31.53 o
  10   0   2      158.04      136.75     21.75 o
  12   0   2     3955.19     3983.53    198.53 o
  14   0   2       50.85       44.80     16.31 o
  16   0   2      489.37      570.54     52.94 o
  18   0   2       10.65       20.90     47.65 o
  20   0   2      653.71      809.60    115.36 o
 -21   1   2        2.14       -0.98     24.22 o
 -19   1   2        1.38      -14.95     15.54 o
 -17   1   2      683.85      664.88     34.28 o
 -15   1   2      281.36      292.72     21.53 o
 -13   1   2       98.03       99.60      8.51 o
 -11   1   2      477.72      465.06     13.25 o
  -9   1   2      767.25      764.15     18.67 o
  -7   1   2     1576.68     1625.56     32.63 o
  -5   1   2     7849.00     8003.96     86.05 o
  -3   1   2      287.97      263.74      5.28 o
  -1   1   2      137.56      127.96     12.63 o
   1   1   2      445.44      456.08      6.67 o
   3   1   2      631.82      617.83     10.26 o
   5   1   2       12.89       11.79      4.45 o
   7   1   2     1448.15     1459.03     26.68 o
   9   1   2      160.25      176.56     11.68 o
  11   1   2       32.47       33.59      9.58 o
  13   1   2     1111.76     1106.31     31.32 o
  15   1   2      381.07      422.71     26.83 o
  17   1   2       35.87       24.00     23.95 o
  19   1   2      230.75      244.87     39.31 o
 -22   2   2       81.64      102.26     34.48 o
 -20   2   2        5.37       -0.70     32.58 o
 -18   2   2        1.50      -11.95     11.95 o
 -16   2   2      174.81      224.17     20.60 o
 -14   2   2      146.64      158.02     17.62 o
 -12   2   2        0.03       -5.11      8.63 o
 -10   2   2      747.43      819.47     20.27 o
  -8   2   2      152.54      143.89     11.93 o
  -6   2   2      303.50      312.30      9.87 o
  -4   2   2     1389.60     1366.96     13.48 o
  -2   2   2     7260.56     6588.21    242.15 o
   0   2   2    11538.64    11726.17    118.17 o
   2   2   2    11349.37    11620.42     89.82 o
   4   2   2     1673.23     1801.30     23.44 o
   6   2   2     4090.20     4252.60     30.57 o
   8   2   2     1317.44     1376.68     23.93 o
  10   2   2       79.45       56.16      7.59 o
  12   2   2      116.95      136.95     11.73 o
  14   2   2       55.67       70.48     15.11 o
  16   2   2      202.66      175.39     25.66 o
  18   2   2      197.40      193.18     36.11 o
  20   2   2      896.49      992.39     67.70 o
 -21   3   2       64.96       68.79     30.52 o
 -19   3   2      157.32      199.99     35.42 o
 -17   3   2       80.04       92.60     21.31 o
 -15   3   2     1346.79     1241.87     38.76 o
 -13   3   2      228.55      253.59     18.92 o
 -11   3   2      857.94      869.22     28.16 o
  -9   3   2      161.00      183.98     13.71 o
  -7   3   2      134.38      136.83      7.40 o
  -5   3   2      842.37      911.23     13.31 o
  -3   3   2     2422.99     2542.14     22.80 o
  -1   3   2      255.98      269.38      9.46 o
   1   3   2     4172.65     4321.10     46.37 o
   3   3   2      175.22      163.98      9.57 o
   5   3   2      173.06      205.93     13.70 o
   7   3   2        0.18       -3.03      4.57 o
   9   3   2        4.14        7.12      4.53 o
  11   3   2      141.37      143.70     10.09 o
  13   3   2      694.22      435.97    137.00 o
  15   3   2      672.81      656.10     39.94 o
  17   3   2      212.48      186.10     28.05 o
  19   3   2       65.98       52.01     29.93 o
 -20   4   2       22.91       29.30     25.58 o
 -18   4   2       41.79       28.18     18.50 o
 -16   4   2      190.06      178.18     23.98 o
 -14   4   2       95.78       90.09     14.92 o
 -12   4   2      518.66      582.92     25.48 o
 -10   4   2      106.62      120.44     13.17 o
  -8   4   2     6174.31     6540.04     80.25 o
  -6   4   2     5290.12     5665.13     83.51 o
  -4   4   2      133.43      115.75      9.22 o
  -2   4   2      357.00      357.08     18.13 o
   0   4   2     4615.13     4837.49     45.47 o
   2   4   2        2.15        3.36      3.91 o
   4   4   2     1566.75     1599.49     27.03 o
   6   4   2     1297.01     1356.42     32.73 o
   8   4   2      608.69      532.23     23.22 o
  10   4   2     1488.31     1514.71     37.32 o
  12   4   2      105.67      115.43     21.01 o
  14   4   2      263.65      271.38     29.32 o
  16   4   2      914.26      950.17     60.74 o
  18   4   2      203.34      206.51     31.92 o
 -21   5   2      209.99      215.73     41.16 o
 -19   5   2       12.10       -6.02     17.78 o
 -17   5   2      111.85      113.03     23.95 o
 -15   5   2      136.86       88.35     20.43 o
 -13   5   2      271.12      276.06     27.01 o
 -11   5   2      546.69      601.24     24.52 o
  -9   5   2     1647.61     1731.04     30.76 o
  -7   5   2      144.45      143.81      8.75 o
  -5   5   2     4037.69     4072.18     46.78 o
  -3   5   2      142.03      183.71     12.25 o
  -1   5   2     4188.17     4313.74     63.46 o
   1   5   2     2237.39     2460.46     35.52 o
   3   5   2     3848.62     4333.09     72.91 o
   5   5   2      259.22      201.62     12.28 o
   7   5   2       42.47       42.53     11.16 o
   9   5   2     1132.93     1082.83     33.90 o
  11   5   2       37.45       45.27     16.33 o
  13   5   2      782.47      785.50     43.81 o
  15   5   2       56.63       64.65     21.72 o
  17   5   2       97.08       87.13     25.45 o
  19   5   2        0.84      -19.84     34.43 o
 -20   6   2        5.05       -1.51     29.03 o
 -18   6   2      480.56      539.46     42.78 o
 -16   6   2      725.41      723.55     44.45 o
 -14   6   2      168.93      184.05     25.93 o
 -12   6   2       93.50       97.43     20.04 o
 -10   6   2       52.17       54.50      9.05 o
  -8   6   2        0.11        2.02      6.60 o
  -6   6   2     1045.23     1070.46     27.19 o
  -4   6   2      357.96      451.46     17.96 o
  -2   6   2     1072.05      839.02    172.17 o
   0   6   2      194.42      194.25     13.70 o
   2   6   2     1089.60     1024.26     26.18 o
   4   6   2      219.29      251.72     10.65 o
   6   6   2     1202.39     1274.94     27.80 o
   8   6   2     3265.86     3034.62     64.43 o
  10   6   2       40.75       53.93     17.61 o
  12   6   2      450.24      418.16     34.91 o
  14   6   2      291.77      318.26     33.62 o
  16   6   2      124.71      111.70     26.98 o
  18   6   2       15.07       10.84     20.72 o
 -19   7   2      180.40      244.55     34.56 o
 -17   7   2      165.78      191.17     30.00 o
 -15   7   2       37.42       46.11     20.14 o
 -13   7   2       75.74       71.29     19.52 o
 -11   7   2      364.43      308.34     29.17 o
  -9   7   2      491.49      487.19     24.53 o
  -7   7   2      545.80      554.83     22.28 o
  -5   7   2       34.65       36.20      9.51 o
  -3   7   2     1013.67     1014.16     29.36 o
  -1   7   2        0.00        2.98      7.09 o
   1   7   2     1088.75     1103.37     28.17 o
   3   7   2       28.91       47.84      9.88 o
   5   7   2       34.29       36.03      9.82 o
   7   7   2      732.08      650.51     32.46 o
   9   7   2       15.26        7.92     11.48 o
  11   7   2       13.79        8.44     15.38 o
  13   7   2      293.67      295.51     32.96 o
  15   7   2       60.78       49.97     21.87 o
  17   7   2      286.43      330.49     39.76 o
 -18   8   2       86.76      100.72     28.10 o
 -16   8   2      563.96      547.83     43.84 o
 -14   8   2      471.27      431.04     37.61 o
 -12   8   2        4.22       -1.13     13.69 o
 -10   8   2        7.15       -5.46     12.97 o
  -8   8   2       61.77       71.17     11.99 o
  -6   8   2      972.46      909.70     30.09 o
  -4   8   2        3.70        0.62      8.02 o
  -2   8   2        8.75        6.19      8.88 o
   0   8   2        7.45        4.49      8.62 o
   2   8   2        0.76        4.19      8.26 o
   4   8   2      100.23       99.05     11.42 o
   6   8   2     1562.64     1490.59     45.70 o
   8   8   2      687.09      680.69     33.35 o
  10   8   2        5.04       -4.53     14.31 o
  12   8   2      188.61      190.86     29.09 o
  14   8   2      294.76      305.96     36.00 o
  16   8   2        0.50        1.44     20.28 o
 -17   9   2        7.69        6.08     21.17 o
 -15   9   2       12.49       12.28     20.12 o
 -13   9   2      232.79      191.29     29.24 o
 -11   9   2      650.25      586.96     44.46 o
  -9   9   2      128.17      125.40     22.71 o
  -7   9   2      584.74      628.31     33.12 o
  -5   9   2      288.78      311.02     21.41 o
  -3   9   2      187.12      179.06     16.52 o
  -1   9   2     2423.07     2109.27    141.40 o
   1   9   2      235.29      220.61     17.74 o
   3   9   2     3362.81     3355.66     65.46 o
   5   9   2      791.29      741.92     35.63 o
   7   9   2        0.00        0.59     11.31 o
   9   9   2      850.70      784.91     47.04 o
  11   9   2      523.57      540.83     42.53 o
  13   9   2       82.76       89.91     25.60 o
 -14  10   2      226.69      211.45     33.48 o
 -12  10   2     1316.49     1436.08     67.21 o
 -10  10   2       50.40       30.12     18.57 o
  -8  10   2      749.28      728.50     37.93 o
  -6  10   2      105.71       83.85     18.14 o
  -4  10   2      636.71      590.98     29.43 o
  -2  10   2      221.00      191.66     19.73 o
   0  10   2       30.46       20.91     10.86 o
   2  10   2      228.10      263.84     25.35 o
   4  10   2      135.25      146.29     21.41 o
   6  10   2        4.94        3.05     12.87 o
   8  10   2        1.26       -5.99     13.81 o
  10  10   2      136.21      120.14     26.27 o
  12  10   2        1.15       -4.43     17.60 o
 -13  11   2        2.07      -17.35     17.35 o
 -11  11   2        2.44       -3.05     17.38 o
  -9  11   2        5.80       11.05     17.38 o
  -7  11   2      358.27      357.49     30.60 o
  -5  11   2      191.55      203.38     25.06 o
  -3  11   2      150.38      179.37     19.60 o
  -1  11   2      330.45      349.52     25.56 o
   1  11   2      107.22       75.28     18.87 o
   3  11   2        0.09        3.99     13.19 o
   5  11   2      405.36      419.68     32.96 o
   7  11   2       35.45       28.59     18.39 o
   9  11   2      174.45      209.31     33.40 o
  11  11   2        0.29       14.41     19.92 o
 -10  12   2        0.03       -6.40     18.55 o
  -8  12   2       78.39       83.11     24.30 o
  -6  12   2      170.58      216.11     27.97 o
  -4  12   2       37.96       25.85     15.38 o
  -2  12   2      390.93      472.97     32.40 o
   0  12   2       37.05       45.66     18.23 o
   2  12   2      365.89      336.07     31.96 o
   4  12   2       88.26      123.57     23.56 o
   6  12   2        0.29       -4.91     17.28 o
   8  12   2        1.85       11.34     20.47 o
  -5  13   2        1.80        6.31     19.08 o
  -3  13   2       15.23       -4.42     18.89 o
  -1  13   2       12.80        9.65     15.72 o
   1  13   2       27.43       30.92     17.12 o
   3  13   2        8.73       -8.06     16.23 o
 -23   1   3       22.02       33.35     29.53 o
 -21   1   3       32.42       37.33     26.26 o
 -19   1   3        4.54       10.86     16.79 o
 -17   1   3      333.76      327.29     23.73 o
 -15   1   3      211.43      241.93     14.94 o
 -13   1   3        4.39        6.19      5.36 o
 -11   1   3      166.58      179.68      9.01 o
  -9   1   3        6.07        4.02      3.48 o
  -7   1   3    21256.95    22214.77    213.05 o
  -5   1   3   102435.99    97819.00   1593.77 o
  -3   1   3       27.86       30.48      2.67 o
  -1   1   3     3578.26     3474.39     28.00 o
   1   1   3     5142.09     4763.25    243.77 o
   3   1   3       15.15       26.64      7.96 o
   5   1   3      839.01      803.59     17.72 o
   7   1   3      313.33      335.98     13.88 o
   9   1   3      882.04      896.35     24.61 o
  11   1   3     1143.63     1182.66     26.32 o
  13   1   3      112.16      103.55     11.36 o
  15   1   3     1246.74     1218.11     43.37 o
  17   1   3      470.93      502.07     47.08 o
  19   1   3      888.64      857.45     81.87 o
 -22   2   3        6.30       13.64     26.27 o
 -20   2   3        2.10      -20.12     20.12 o
 -18   2   3        7.59       16.23     14.47 o
 -16   2   3      155.18      159.78     18.62 o
 -14   2   3      393.35      393.47     18.95 o
 -12   2   3     1085.74     1062.94     25.75 o
 -10   2   3     2751.94     2884.47     35.01 o
  -8   2   3     1090.52     1109.34     21.26 o
  -6   2   3     4556.43     4414.22     37.44 o
  -4   2   3      764.37      781.63     33.64 o
  -2   2   3    20057.82    18804.14    714.77 o
   0   2   3    11972.38    10749.48    541.31 o
   2   2   3       24.07       27.81      3.89 o
   4   2   3     3468.08     3600.57     28.25 o
   6   2   3      160.67      183.03      9.03 o
   8   2   3      870.43      920.48     20.02 o
  10   2   3        0.01       -1.25      5.88 o
  12   2   3      181.94      185.23     13.59 o
  14   2   3      173.13      164.23     23.84 o
  16   2   3      310.24      303.54     31.37 o
  18   2   3        2.34        4.92     24.29 o
 -21   3   3      110.62      102.58     31.66 o
 -19   3   3      406.64      414.09     35.33 o
 -17   3   3      239.38      258.34     25.53 o
 -15   3   3        5.16        8.70      7.33 o
 -13   3   3      631.83      599.08     40.55 o
 -11   3   3     1499.42     1530.71     25.56 o
  -9   3   3     5299.49     5302.04     46.78 o
  -7   3   3      101.05      103.47      5.90 o
  -5   3   3     5537.99     6124.38     46.81 o
  -3   3   3      151.99      113.57     16.54 o
  -1   3   3     1421.14     1520.06     20.32 o
   1   3   3      660.34      637.73     12.12 o
   3   3   3      132.74      149.94      8.74 o
   5   3   3     5407.24     5656.54     57.52 o
   7   3   3     1749.78     1848.02     27.64 o
   9   3   3     2918.83     3053.09     43.61 o
  11   3   3      457.97      403.93     16.32 o
  13   3   3        2.13        5.89     11.44 o
  15   3   3      280.79      254.54     29.47 o
  17   3   3      489.49      506.32     39.95 o
  19   3   3        1.71       -8.73     24.64 o
 -22   4   3      123.14       89.79     34.04 o
 -20   4   3      261.03      309.81     42.03 o
 -18   4   3      817.98      744.81     45.07 o
 -16   4   3       15.33        4.40     12.32 o
 -14   4   3        2.18       -2.26     10.19 o
 -12   4   3       28.63       32.24     11.46 o
 -10   4   3     1850.81     1852.97     39.05 o
  -8   4   3       19.59       28.40      4.55 o
  -6   4   3     3936.19     3879.41     36.90 o
  -4   4   3      182.05      169.70     10.30 o
  -2   4   3     1704.51     1758.53     28.72 o
   0   4   3      652.58      689.82     15.59 o
   2   4   3      961.81     1055.61     16.79 o
   4   4   3     2244.47     2350.36     34.56 o
   6   4   3     2547.62     2621.47     49.86 o
   8   4   3        5.19       13.91      9.28 o
  10   4   3      110.37      120.84     15.74 o
  12   4   3     1777.18     1711.77     57.67 o
  14   4   3        8.91        4.82     16.40 o
  16   4   3      479.45      317.86     85.55 o
  18   4   3       22.43       26.34     27.17 o
 -21   5   3        4.73       -2.83     25.07 o
 -19   5   3        0.59       -1.90     18.39 o
 -17   5   3       30.80       21.05     17.39 o
 -15   5   3        1.04        9.00     13.90 o
 -13   5   3      133.33      117.15     15.97 o
 -11   5   3      903.54      867.29     30.10 o
  -9   5   3      777.35      902.77     23.13 o
  -7   5   3     1372.88     1184.68     22.59 o
  -5   5   3     1494.42     1490.67     29.78 o
  -3   5   3      127.91      135.46     14.79 o
  -1   5   3     5074.41     5269.03     53.87 o
   1   5   3      558.77      598.86     19.26 o
   3   5   3     7089.85     7461.67    101.49 o
   5   5   3      135.66      114.30     10.74 o
   7   5   3      108.60      136.40     15.31 o
   9   5   3     2755.46     2643.29     53.03 o
  11   5   3      271.63      230.61     26.30 o
  13   5   3        2.10       -5.99     14.35 o
  15   5   3      152.09      126.55     25.70 o
  17   5   3      146.27      166.10     30.31 o
 -20   6   3      129.88      128.04     30.16 o
 -18   6   3      163.61      164.44     28.80 o
 -16   6   3       73.77       76.63     23.77 o
 -14   6   3      453.11      421.90     33.31 o
 -12   6   3      619.16      626.69     26.54 o
 -10   6   3       32.06       34.52      8.77 o
  -8   6   3     1156.03     1016.51     22.47 o
  -6   6   3     1075.35     1083.32     28.13 o
  -4   6   3     1289.19     1313.35     30.76 o
  -2   6   3       31.15        1.84      6.43 o
   0   6   3      703.57      712.39     21.58 o
   2   6   3      355.06      356.65     15.45 o
   4   6   3      200.54      190.51     14.46 o
   6   6   3      324.29      360.76     17.27 o
   8   6   3        2.25        0.12     10.55 o
  10   6   3      464.27      447.05     33.97 o
  12   6   3      514.29      445.53     36.59 o
  14   6   3      300.77      324.25     34.93 o
  16   6   3      611.18      557.94     44.47 o
 -19   7   3      102.61      107.13     28.50 o
 -17   7   3       10.45       24.81     19.75 o
 -15   7   3      296.68      332.94     33.39 o
 -13   7   3      254.03      240.46     28.05 o
 -11   7   3      298.73      300.58     28.65 o
  -9   7   3      258.24      256.09     13.30 o
  -7   7   3        2.69        4.87      6.70 o
  -5   7   3      931.24      908.46     28.25 o
  -3   7   3     1253.96      957.27    165.85 o
  -1   7   3        8.55        5.47      8.17 o
   1   7   3      318.89      299.93     17.86 o
   3   7   3     1837.25     1863.17     35.20 o
   5   7   3      445.93      464.48     21.50 o
   7   7   3        0.66       -2.95     10.21 o
   9   7   3      202.55      207.98     26.26 o
  11   7   3      411.08      336.77     33.16 o
  13   7   3      401.18      377.47     36.88 o
  15   7   3        2.42      -12.44     17.95 o
 -18   8   3        6.72      -14.86     18.59 o
 -16   8   3       62.24       36.02     20.59 o
 -14   8   3      398.71      278.25     32.11 o
 -12   8   3       18.08       20.14     15.57 o
 -10   8   3      497.30      515.63     35.73 o
  -8   8   3     1948.23     1877.28     35.76 o
  -6   8   3      415.04      391.55     21.56 o
  -4   8   3      186.42      180.75     15.58 o
  -2   8   3      261.04      144.44     43.98 o
   0   8   3     1104.84     1040.03     30.16 o
   2   8   3      744.71      669.99     26.27 o
   4   8   3      285.50      265.12     19.11 o
   6   8   3       50.85       47.90     14.53 o
   8   8   3     2098.98     2041.49     55.02 o
  10   8   3        4.40       -3.87     14.84 o
  12   8   3       14.94       -9.83     15.30 o
  14   8   3        0.56       12.34     19.52 o
 -17   9   3       90.44       95.68     27.70 o
 -15   9   3       24.24       38.52     20.80 o
 -13   9   3        0.00        1.57     15.68 o
 -11   9   3       43.20       38.22     18.37 o
  -9   9   3      174.49      193.56     21.62 o
  -7   9   3      784.30      766.83     42.68 o
  -5   9   3      482.74      413.78     24.06 o
  -3   9   3        3.31        2.69      9.38 o
  -1   9   3       11.50       12.13     10.59 o
   1   9   3       22.99       25.99     11.06 o
   3   9   3      447.37      438.35     29.25 o
   5   9   3       36.31       31.07     14.15 o
   7   9   3       82.75       68.22     17.34 o
   9   9   3      416.06      403.62     37.27 o
  11   9   3        0.26        9.43     16.16 o
  13   9   3      159.67      179.98     32.06 o
 -16  10   3       54.43       65.63     25.77 o
 -14  10   3       19.60       30.96     21.22 o
 -12  10   3        1.95       21.56     17.99 o
 -10  10   3      305.88      289.97     33.26 o
  -8  10   3      156.93      154.99     21.97 o
  -6  10   3       42.43       56.99     14.39 o
  -4  10   3      442.39      441.49     29.82 o
  -2  10   3       12.98       13.49     11.25 o
   0  10   3       29.85       23.99     10.86 o
   2  10   3      143.05      136.04     21.13 o
   4  10   3       14.48        4.18     12.54 o
   6  10   3        2.78        1.08     13.21 o
   8  10   3      381.78      353.28     36.10 o
  10  10   3       83.72       82.33     24.69 o
  12  10   3       30.88       15.74     20.46 o
 -13  11   3       68.52       48.63     22.76 o
 -11  11   3       47.30       74.82     23.93 o
  -9  11   3      255.85      266.45     33.66 o
  -7  11   3      310.06      293.17     28.73 o
  -5  11   3       36.45       27.51     15.71 o
  -3  11   3       86.37       88.02     16.00 o
  -1  11   3      115.95       93.05     24.28 o
   1  11   3      450.94      473.69     33.51 o
   3  11   3       96.60      116.17     21.97 o
   5  11   3        5.69       10.92     14.80 o
   7  11   3       26.34       36.55     19.74 o
   9  11   3       17.58       14.49     19.44 o
 -10  12   3       27.32       12.61     20.28 o
  -8  12   3       27.16       17.16     19.66 o
  -6  12   3      301.78      352.86     32.42 o
  -4  12   3       28.53       41.55     17.88 o
  -2  12   3       27.16       38.25     14.31 o
   0  12   3      299.35      347.42     32.13 o
   2  12   3      243.14      294.44     31.00 o
   4  12   3      105.59      123.65     24.39 o
   6  12   3       15.53       37.05     20.71 o
  -5  13   3       73.01       88.62     22.88 o
  -3  13   3      501.44      622.73     43.39 o
  -1  13   3        0.16        0.74     18.80 o
   1  13   3      102.29      131.29     25.92 o
 -22   0   4      169.90      202.41     44.35 o
 -20   0   4       47.93      101.21     34.11 o
 -18   0   4       14.25        8.37     31.56 o
 -16   0   4      291.99      310.40     25.79 o
 -14   0   4       63.50       53.57     13.84 o
 -12   0   4      189.33      181.82     17.34 o
 -10   0   4    36799.97    38123.18   1240.26 o
  -8   0   4    20374.88    21573.07    463.25 o
  -6   0   4    21611.72    22411.03    425.02 o
  -4   0   4    39212.71    38881.04    501.19 o
  -2   0   4      279.49      281.53     11.81 o
   0   0   4    12864.28    12197.28    157.12 o
   2   0   4    11817.32    11185.55    184.33 o
   4   0   4     6416.52     6207.61    137.67 o
   6   0   4     3612.57     3653.93    149.72 o
   8   0   4     7780.41     7718.75    315.30 o
  10   0   4        0.20       12.19     12.16 o
  12   0   4      119.60      130.00     20.93 o
  14   0   4     1804.44     1823.08     86.27 o
  16   0   4     1385.45     1252.22    121.63 o
  18   0   4     1946.12     1832.78    155.48 o
 -23   1   4       75.72      124.79     34.14 o
 -21   1   4      398.04      393.85     36.79 o
 -19   1   4      383.63      362.04     32.86 o
 -17   1   4      431.01      413.59     22.32 o
 -15   1   4      898.16      887.84     25.05 o
 -13   1   4      838.00      904.54     17.32 o
 -11   1   4      706.15      688.87     14.49 o
  -9   1   4    10213.18    10527.73    133.55 o
  -7   1   4     8261.14     8345.58     96.06 o
  -5   1   4     1334.33     1276.47     19.05 o
  -3   1   4     4549.66     4632.69     39.67 o
  -1   1   4      505.53      485.36      8.56 o
   1   1   4      752.15      815.55     17.59 o
   3   1   4     1762.63     1854.46     29.04 o
   5   1   4      122.79      136.29      9.81 o
   7   1   4      198.83      205.60     12.18 o
   9   1   4       14.99       17.69      8.01 o
  11   1   4       32.48       34.25      9.63 o
  13   1   4      352.12      377.86     20.12 o
  15   1   4       36.89       33.49     17.36 o
  17   1   4        0.04      -10.31     21.23 o
  19   1   4        0.22        1.36     34.93 o
 -22   2   4      178.44      140.14     35.36 o
 -20   2   4       15.74       -2.33     22.82 o
 -18   2   4       15.87        2.09     12.75 o
 -16   2   4       24.55       11.62      9.59 o
 -14   2   4      152.25      174.11     14.41 o
 -12   2   4      464.11      473.60     17.28 o
 -10   2   4     5378.84     5613.95     56.85 o
  -8   2   4     3820.00     4191.57     52.57 o
  -6   2   4      789.34      723.59     12.31 o
  -4   2   4      766.21      797.42     12.74 o
  -2   2   4     4894.77     4407.87    389.90 o
   0   2   4     5466.20     5566.75     36.28 o
   2   2   4    13447.16    13786.47    135.56 o
   4   2   4     3261.90     3621.61     38.30 o
   6   2   4      817.95      896.18     20.64 o
   8   2   4       11.96       13.51      6.76 o
  10   2   4      146.86      126.54     11.23 o
  12   2   4      185.57      173.10     14.10 o
  14   2   4       73.11       65.61     19.85 o
  16   2   4      254.98      236.03     29.60 o
  18   2   4      940.99      990.90    100.66 o
 -23   3   4      227.84      234.23     45.36 o
 -21   3   4       39.69        4.00     23.72 o
 -19   3   4        7.09       -1.47     16.08 o
 -17   3   4      576.75      534.96     29.88 o
 -15   3   4        0.48        2.75      7.33 o
 -13   3   4       68.88       55.17      9.41 o
 -11   3   4      130.16      125.17     10.39 o
  -9   3   4       39.56       27.89      6.80 o
  -7   3   4     1495.05     1540.27     24.09 o
  -5   3   4      436.31      403.51     35.55 o
  -3   3   4     2937.98     3087.12     42.07 o
  -1   3   4     3464.09     3567.66     36.49 o
   1   3   4    11875.36    12184.97    163.26 o
   3   3   4      913.70      981.63     16.71 o
   5   3   4     2808.10     2885.40     34.99 o
   7   3   4      405.83      419.40     14.23 o
   9   3   4      232.41      232.27     12.30 o
  11   3   4       73.34       88.01     12.15 o
  13   3   4       68.53       51.15     18.59 o
  15   3   4       15.74       19.13     18.00 o
  17   3   4        1.05        5.16     23.42 o
 -22   4   4      175.70      237.80     42.04 o
 -20   4   4      123.38       83.77     24.19 o
 -18   4   4      336.79      305.47     31.21 o
 -16   4   4      432.38      396.93     73.98 o
 -14   4   4     1534.65     1571.22     42.70 o
 -12   4   4      293.32      295.09     20.58 o
 -10   4   4      393.63      381.35     20.59 o
  -8   4   4     4594.28     4520.17     65.33 o
  -6   4   4     5562.85     5766.49     47.44 o
  -4   4   4     1130.97     1251.51     25.41 o
  -2   4   4     1914.89     2062.57     29.55 o
   0   4   4     1848.29     1837.94     25.89 o
   2   4   4      298.31      264.52     10.44 o
   4   4   4     1530.03     1646.92     29.31 o
   6   4   4     4800.72     4768.78     60.16 o
   8   4   4       38.40       39.95      8.87 o
  10   4   4      429.17      430.09     18.98 o
  12   4   4     1219.64     1184.96     50.62 o
  14   4   4      596.14      635.12     42.14 o
  16   4   4      248.14      135.60     54.67 o
  18   4   4       47.23       13.97     27.79 o
 -21   5   4      155.53      177.00     38.26 o
 -19   5   4       95.35      102.13     23.86 o
 -17   5   4       35.52       21.25     17.51 o
 -15   5   4      195.85      241.76     27.39 o
 -13   5   4     1814.12     1952.01     46.34 o
 -11   5   4      498.75      430.24     23.91 o
  -9   5   4      179.49      181.79     10.66 o
  -7   5   4      604.55      522.18     16.67 o
  -5   5   4     1212.63     1218.03     25.94 o
  -3   5   4     2778.32     2868.81     45.70 o
  -1   5   4        5.86       18.61      6.99 o
   1   5   4      158.35      179.32     11.28 o
   3   5   4     1280.63     1257.00     31.78 o
   5   5   4      282.99      235.93     14.91 o
   7   5   4      368.83      374.41     23.46 o
   9   5   4     1597.98     1573.20     46.18 o
  11   5   4        0.19       -0.03     14.41 o
  13   5   4      615.36      551.55     39.70 o
  15   5   4      546.26      543.32     42.33 o
  17   5   4      335.85      341.24     39.01 o
 -20   6   4        0.17        3.35     18.99 o
 -18   6   4      908.60      874.53     49.91 o
 -16   6   4       22.80       19.38     17.49 o
 -14   6   4      206.65      197.55     28.31 o
 -12   6   4      954.37      904.56     33.07 o
 -10   6   4      240.07      236.10     11.78 o
  -8   6   4      139.53      164.67     11.72 o
  -6   6   4     2120.31     2179.37     35.18 o
  -4   6   4       31.15       22.94      7.74 o
  -2   6   4     1264.00     1154.41     29.25 o
   0   6   4     1352.08     1518.16     32.53 o
   2   6   4       67.52       50.88      7.35 o
   4   6   4      294.57      318.02     17.96 o
   6   6   4      625.73      547.30     29.00 o
   8   6   4     1446.67     1402.10     42.75 o
  10   6   4      175.12      145.33     23.92 o
  12   6   4      158.51      148.43     26.32 o
  14   6   4       15.88       17.85     18.46 o
  16   6   4        2.37       11.75     20.06 o
 -19   7   4        0.77      -17.64     18.24 o
 -17   7   4       47.76       23.63     19.44 o
 -15   7   4       19.41       20.18     17.48 o
 -13   7   4      126.32      140.96     23.74 o
 -11   7   4       96.01       87.78     14.79 o
  -9   7   4      259.42      224.37     13.88 o
  -7   7   4     2555.47     2379.96     39.30 o
  -5   7   4      312.42      320.66     17.77 o
  -3   7   4      969.80      952.44     29.21 o
  -1   7   4       86.34       81.33     12.24 o
   1   7   4      196.68      199.63     14.10 o
   3   7   4        0.05       -2.22      6.46 o
   5   7   4     1363.03     1337.25     38.60 o
   7   7   4      136.61      119.65     17.76 o
   9   7   4        4.35        2.16     13.81 o
  11   7   4      346.87      352.02     34.93 o
  13   7   4      118.72      120.22     25.85 o
  15   7   4       26.19       19.91     26.86 o
 -18   8   4      916.19      873.60     55.07 o
 -16   8   4      139.69      153.14     28.33 o
 -14   8   4       53.76       54.69     20.02 o
 -12   8   4      631.69      627.99     40.15 o
 -10   8   4      785.34      725.77     27.45 o
  -8   8   4      186.01      188.27     14.75 o
  -6   8   4     1498.76     1548.83     39.32 o
  -4   8   4        4.76       15.93      8.56 o
  -2   8   4      204.48      257.60     18.86 o
   0   8   4      216.58      237.48     18.13 o
   2   8   4      218.86      209.14     15.33 o
   4   8   4       22.92       15.02      9.90 o
   6   8   4     1572.19     1474.59     47.23 o
   8   8   4     1235.49     1141.75     52.43 o
  10   8   4      102.57       90.86     30.65 o
  12   8   4       26.76       39.62     22.98 o
  14   8   4       71.37       67.60     24.80 o
 -17   9   4       24.45       14.68     20.96 o
 -15   9   4       13.44        7.47     19.01 o
 -13   9   4       58.89       49.50     19.82 o
 -11   9   4      787.17      770.42     44.23 o
  -9   9   4      683.76      592.67     32.84 o
  -7   9   4     4024.59     4063.78     65.94 o
  -5   9   4      450.47      445.66     23.27 o
  -3   9   4       82.42       61.99     12.25 o
  -1   9   4     2816.48     2675.46     50.10 o
   1   9   4     1410.20     1326.54     34.81 o
   3   9   4        9.80       -4.98     11.37 o
   5   9   4     1198.06     1131.61     44.26 o
   7   9   4      148.28      150.39     21.78 o
   9   9   4        0.75      -14.55     14.55 o
  11   9   4      235.88      245.36     33.72 o
  13   9   4        0.34        5.45     20.55 o
 -16  10   4      408.51      421.60     43.45 o
 -14  10   4       42.10       32.67     20.33 o
 -12  10   4       17.28       42.95     20.49 o
 -10  10   4        5.16        1.24     14.93 o
  -8  10   4      804.59      832.79     39.43 o
  -6  10   4      276.99      285.64     22.54 o
  -4  10   4      421.24      412.03     24.35 o
  -2  10   4      409.69      425.13     26.28 o
   0  10   4       14.57        7.44     12.45 o
   2  10   4       65.63       56.49     16.76 o
   4  10   4      137.32      109.97     20.67 o
   6  10   4        7.82       -7.79     13.39 o
   8  10   4      494.96      510.10     42.75 o
  10  10   4      308.59      333.39     38.11 o
 -13  11   4       22.14       15.93     22.98 o
 -11  11   4       35.47       40.37     20.90 o
  -9  11   4      103.37      114.42     25.91 o
  -7  11   4      117.42      153.95     23.09 o
  -5  11   4        0.90        1.01     10.59 o
  -3  11   4        0.98       -7.87     11.30 o
  -1  11   4      133.76      171.38     23.65 o
   1  11   4       47.33       65.51     18.75 o
   3  11   4      126.82      138.13     23.17 o
   5  11   4       97.33      134.48     23.97 o
   7  11   4       62.14       59.15     23.17 o
   9  11   4      101.15      102.21     27.65 o
 -10  12   4       10.63        2.98     19.72 o
  -8  12   4      188.30      222.64     33.31 o
  -6  12   4       13.47        8.65     16.13 o
  -4  12   4       19.22       -5.18     13.74 o
  -2  12   4       67.23       79.37     18.92 o
   0  12   4        0.00        9.25     15.27 o
   2  12   4        2.69       16.86     15.98 o
   4  12   4        0.00      -10.81     15.27 o
   6  12   4      241.31      233.29     35.14 o
  -5  13   4      356.97      436.47     43.09 o
  -3  13   4       24.53       24.20     17.22 o
  -1  13   4       10.95        5.69     15.87 o
   1  13   4       34.38       66.59     22.88 o
 -23   1   5        3.66       11.51     25.51 o
 -21   1   5       59.84       74.25     22.85 o
 -19   1   5      106.29       79.68     21.96 o
 -17   1   5     1155.17     1116.72     32.95 o
 -15   1   5      252.60      258.07     13.91 o
 -13   1   5     1368.59     1653.74     30.81 o
 -11   1   5    12526.76    13226.21    201.61 o
  -9   1   5     1034.22     1012.42     19.14 o
  -7   1   5      844.17      813.26     14.68 o
  -5   1   5      313.40      340.62     16.31 o
  -3   1   5     4564.12     4326.28     50.81 o
  -1   1   5     4500.11     4330.38     31.83 o
   1   1   5        1.21        8.03      3.02 o
   3   1   5       85.03       79.26      7.63 o
   7   1   5     4320.78     4520.53     52.84 o
   9   1   5      714.52      721.23     23.52 o
  11   1   5     1155.34     1179.86     34.05 o
  13   1   5      196.28      193.22     16.97 o
  15   1   5       11.54        4.03     15.97 o
  17   1   5      158.09      174.00     46.76 o
 -24   2   5       77.05       89.06     34.82 o
 -22   2   5      710.19      744.94     57.95 o
 -20   2   5       66.72       56.90     18.06 o
 -18   2   5      668.35      689.79     29.88 o
 -16   2   5       11.94       43.86     12.06 o
 -14   2   5      178.42      171.42     13.42 o
 -12   2   5     7619.63     7815.39     73.60 o
 -10   2   5     4794.65     5096.60    105.29 o
  -8   2   5     1258.49     1356.16     17.53 o
  -6   2   5     6789.95     7130.02     91.03 o
  -4   2   5      365.29      399.11      9.63 o
  -2   2   5     1476.11     1473.87     17.35 o
   0   2   5    18155.44    18538.64    235.08 o
   2   2   5     1342.37     1390.78     28.69 o
   6   2   5      756.06     1006.08     24.50 o
   8   2   5      459.09      435.15     17.97 o
  10   2   5     1843.50     1817.68     43.49 o
  12   2   5      725.62      698.25     64.38 o
  14   2   5      161.51      156.56     25.52 o
  16   2   5       83.11       78.21     28.59 o
  18   2   5       89.33      115.99     42.78 o
 -23   3   5      145.58      173.91     38.81 o
 -21   3   5       24.16       31.27     25.08 o
 -19   3   5       16.07       51.11     15.93 o
 -17   3   5      349.95      370.25     25.71 o
 -15   3   5      113.46      127.79     13.05 o
 -13   3   5       76.60       46.04     11.32 o
 -11   3   5      698.75      708.63     34.33 o
  -9   3   5     6230.40     6535.64     65.54 o
  -7   3   5      852.09      974.45     79.37 o
  -5   3   5       78.95       53.50     15.46 o
  -3   3   5        8.96        5.83      4.04 o
  -1   3   5     4843.22     5038.93     43.10 o
   1   3   5     5729.70     5927.50     49.99 o
   3   3   5      123.15      171.98     26.75 o
   5   3   5       55.94       50.87      6.39 o
   7   3   5        3.58        6.66      5.71 o
   9   3   5      481.48      460.91     17.15 o
  11   3   5       39.78       47.62     14.25 o
  13   3   5     1604.80     1585.23     59.10 o
  15   3   5      380.19      381.69     35.71 o
  17   3   5       42.65       29.43     26.36 o
 -22   4   5       24.83       46.53     27.96 o
 -20   4   5       52.37       49.95     21.16 o
 -18   4   5      366.47      380.40     33.16 o
 -16   4   5       22.91       38.28     13.85 o
 -14   4   5      157.76      172.91     18.81 o
 -12   4   5      110.33      151.16     16.50 o
 -10   4   5       49.00       75.53      6.78 o
  -8   4   5      554.90      532.22     16.32 o
  -6   4   5      466.12      428.16     46.27 o
  -4   4   5     2398.25     2539.64     33.33 o
  -2   4   5      295.19      335.49     14.00 o
   0   4   5      431.21      426.59     13.66 o
   2   4   5      247.70      278.82     10.92 o
   4   4   5     1318.94     1230.38     25.64 o
   6   4   5      694.37      743.01     23.00 o
   8   4   5      785.78      748.35     24.02 o
  10   4   5     1740.90     1703.79     46.73 o
  12   4   5       46.57       45.95     21.85 o
  14   4   5       21.56       10.61     17.62 o
  16   4   5       57.50       33.11     18.13 o
 -21   5   5       50.64       56.57     22.84 o
 -19   5   5        0.94        7.29     14.79 o
 -17   5   5       25.14       37.45     18.28 o
 -15   5   5        0.11        7.40     11.27 o
 -13   5   5       31.99       22.84     12.61 o
 -11   5   5      307.99      385.19     14.60 o
  -9   5   5     3663.62     3896.51     42.88 o
  -7   5   5     1678.78     1770.49     30.23 o
  -5   5   5      408.03      445.01     16.63 o
  -3   5   5     1667.91     1798.00     31.14 o
  -1   5   5       43.96       63.51      8.00 o
   1   5   5        0.19       27.36      6.48 o
   3   5   5       45.43       84.45     17.68 o
   5   5   5       75.04       77.03     11.51 o
   7   5   5      285.36      259.14     21.28 o
   9   5   5      551.10      505.72     28.49 o
  11   5   5       69.71       63.69     19.88 o
  13   5   5      658.26      604.71     42.50 o
  15   5   5      307.43      218.42     32.27 o
 -20   6   5      170.35      190.30     30.57 o
 -18   6   5      390.78      417.38     37.18 o
 -16   6   5      184.83      235.30     27.84 o
 -14   6   5        0.32       39.11     13.31 o
 -12   6   5      367.98      396.17     24.66 o
 -10   6   5      206.74      227.49     13.25 o
  -8   6   5      432.80      477.10     18.27 o
  -6   6   5      639.95      677.59     21.44 o
  -4   6   5      224.13      213.21     33.47 o
  -2   6   5      195.30      141.98     13.11 o
   0   6   5        0.49        8.73      6.90 o
   2   6   5      610.91      567.52     16.33 o
   4   6   5       20.21       24.69      9.25 o
   6   6   5     1681.80     1560.09     35.87 o
   8   6   5     1337.56     1375.31     44.07 o
  10   6   5     1724.12     1650.16     61.44 o
  12   6   5      358.22      312.42     33.60 o
  14   6   5      763.78      806.73     51.08 o
  16   6   5       27.63       29.82     21.59 o
 -19   7   5      158.49      132.10     28.43 o
 -17   7   5       28.31       51.68     20.59 o
 -15   7   5      419.11      459.70     36.59 o
 -13   7   5      321.52      348.51     31.32 o
 -11   7   5     1097.53     1165.67     31.97 o
  -9   7   5      230.10      386.43     18.90 o
  -7   7   5      768.63      750.68     23.94 o
  -5   7   5        1.26        3.28      7.80 o
  -3   7   5      343.76      310.43     18.99 o
  -1   7   5        3.63        8.99      7.90 o
   1   7   5      562.22      573.58     21.36 o
   3   7   5     5068.30     4706.43     64.77 o
   5   7   5      945.80     1041.87     31.56 o
   7   7   5      388.37      349.98     26.11 o
   9   7   5        1.85       16.95     15.98 o
  11   7   5        0.12       -4.87     15.75 o
  13   7   5        5.45      -10.87     16.26 o
  15   7   5        0.08       29.98     22.23 o
 -18   8   5      113.69      124.70     28.53 o
 -16   8   5        0.07        8.75     17.64 o
 -14   8   5      262.34      284.89     31.43 o
 -12   8   5      178.00      162.81     25.15 o
 -10   8   5       48.93       58.25     12.09 o
  -8   8   5      553.26      550.06     22.51 o
  -6   8   5      180.55      190.96     17.37 o
  -4   8   5     1824.55     1711.72     81.92 o
  -2   8   5     1634.16     1609.75     40.31 o
   0   8   5      403.07      349.46     19.20 o
   2   8   5       99.56       83.11     14.12 o
   4   8   5      582.50      511.09     31.42 o
   6   8   5      177.03      172.62     21.51 o
   8   8   5      309.42      298.50     31.99 o
  10   8   5       65.46       71.36     22.23 o
  12   8   5      343.55      324.60     37.24 o
 -17   9   5       36.33       46.77     22.24 o
 -15   9   5       14.64        3.62     17.78 o
 -13   9   5       53.97       51.84     19.73 o
 -11   9   5      669.74      649.34     41.84 o
  -9   9   5       17.56       42.63     12.81 o
  -7   9   5      356.14      389.13     21.38 o
  -5   9   5       46.76       37.45     10.25 o
  -3   9   5      438.64      476.22     25.85 o
  -1   9   5       17.92       30.29     10.62 o
   1   9   5      175.18      176.16     18.63 o
   3   9   5     1260.62     1228.51     45.68 o
   5   9   5      270.60      289.59     26.66 o
   7   9   5       55.62       47.00     19.78 o
   9   9   5       27.97       39.24     19.49 o
  11   9   5      139.77      159.34     30.42 o
 -16  10   5        4.66       -0.75     19.57 o
 -14  10   5        0.29       15.43     19.05 o
 -12  10   5       27.19        5.63     17.21 o
 -10  10   5      131.74      152.95     26.52 o
  -8  10   5       33.28       21.39     14.11 o
  -6  10   5        1.35       13.28     11.21 o
  -4  10   5      802.08      755.04     33.09 o
  -2  10   5      485.04      479.48     25.48 o
   0  10   5      525.16      494.54     32.40 o
   2  10   5      265.64      195.23     24.12 o
   4  10   5       56.49       57.06     17.80 o
   6  10   5       32.08       36.08     18.87 o
   8  10   5        4.13        4.45     17.44 o
  10  10   5       28.98       35.76     21.70 o
 -13  11   5      101.43      107.98     27.70 o
 -11  11   5      148.59      155.83     29.22 o
  -9  11   5      475.11      515.74     41.88 o
  -7  11   5       54.74       64.38     18.28 o
  -5  11   5      151.36      177.03     21.04 o
  -3  11   5       39.93       18.38     10.28 o
  -1  11   5       34.29       23.04     14.35 o
   1  11   5        3.39        3.60     14.18 o
   3  11   5       86.63      111.16     22.08 o
   5  11   5        9.14       18.48     18.14 o
   7  11   5      269.24      298.91     36.31 o
 -10  12   5       19.18       28.17     21.64 o
  -8  12   5        0.76        1.50     18.35 o
  -6  12   5       25.59       -0.83     13.65 o
  -4  12   5       37.19       55.75     17.48 o
  -2  12   5       76.60       71.33     20.39 o
   0  12   5        0.08        0.11     15.12 o
   2  12   5        5.97       -3.35     14.83 o
   4  12   5      167.22      183.86     32.28 o
  -5  13   5       23.67       11.68     21.81 o
  -3  13   5        0.52      -10.02     16.90 o
  -1  13   5        0.34        6.90     17.42 o
 -24   0   6      577.21      580.44     65.45 o
 -22   0   6       61.88       91.73     35.88 o
 -20   0   6        8.70      -18.05     22.72 o
 -18   0   6       23.29       16.09     15.38 o
 -16   0   6        1.56        7.60     11.04 o
 -14   0   6        0.58       -5.27      8.83 o
 -12   0   6     8134.35     8049.30    275.70 o
 -10   0   6    16919.36    16570.45   1012.12 o
  -8   0   6    15223.34    15668.16    265.43 o
  -6   0   6       56.21       48.99      6.17 o
  -4   0   6     2944.21     2769.85     45.85 o
  -2   0   6    15957.96    15686.55     75.96 o
   0   0   6    20222.81    20095.30    253.62 o
   2   0   6    30447.88    24118.08   7092.15 o
   4   0   6     3380.97     3410.39     54.63 o
   6   0   6      111.19      127.90     15.67 o
   8   0   6     3283.15     3237.75     71.55 o
  10   0   6        5.16        8.99     12.07 o
  12   0   6      781.02      839.49     61.41 o
  14   0   6      550.28      525.05     51.55 o
  16   0   6      332.40      255.79     73.56 o
 -23   1   6       53.26       76.70     30.98 o
 -21   1   6        2.28        7.54     18.20 o
 -19   1   6      430.27      483.93     36.00 o
 -17   1   6      127.85      124.05     15.15 o
 -15   1   6     3310.34     3297.75     74.96 o
 -13   1   6     4139.67     4219.63     57.35 o
 -11   1   6      681.83      681.01     16.71 o
  -9   1   6     1989.08     1923.46     62.04 o
  -7   1   6     3056.35     3081.30     30.51 o
  -5   1   6       36.63       40.34      4.83 o
  -3   1   6    13100.51    13014.09    127.41 o
  -1   1   6     2246.00     2225.82     20.18 o
   1   1   6     4331.18     4346.55    103.39 o
   3   1   6      117.58      118.95      9.45 o
   5   1   6      247.19      208.13     12.23 o
   7   1   6     1008.12     1030.22     25.12 o
   9   1   6      294.76      292.77     16.52 o
  11   1   6        2.12       -1.99      8.10 o
  13   1   6       20.93       19.61     11.09 o
  15   1   6       22.05        8.22     22.68 o
  17   1   6        0.03        3.10     32.37 o
 -24   2   6      115.15      181.62     39.66 o
 -22   2   6       27.59        4.26     23.55 o
 -20   2   6       26.96       23.69     18.26 o
 -18   2   6       72.48       65.78     15.77 o
 -16   2   6       73.62       85.16     13.31 o
 -14   2   6      565.13      556.04     22.29 o
 -12   2   6     1031.08      914.18     68.99 o
 -10   2   6     2179.58     2300.92     29.58 o
  -8   2   6     1606.26     1683.29     21.28 o
  -6   2   6     4269.59     4364.67     54.57 o
  -4   2   6       17.21       17.25      3.78 o
  -2   2   6     1632.74     1653.07     19.23 o
   0   2   6       43.13       43.62      5.80 o
   2   2   6     5583.46     5588.98    533.68 o
   4   2   6      387.90      293.09     14.08 o
   6   2   6      248.89      230.10     13.99 o
   8   2   6     1383.27     1346.41     30.66 o
  10   2   6     2089.27     2037.61     53.04 o
  12   2   6       15.99        4.31     10.25 o
  14   2   6     1108.89     1092.73     51.82 o
  16   2   6      500.19      438.77     55.88 o
 -23   3   6       97.62      125.75     35.85 o
 -21   3   6        2.35        5.98     23.18 o
 -19   3   6      149.91      145.23     20.92 o
 -17   3   6        3.73        6.05     11.72 o
 -15   3   6     3643.55     3542.83     51.37 o
 -13   3   6       40.97       33.77      9.34 o
 -11   3   6      406.32      396.58     12.24 o
  -9   3   6     1290.07     1248.44     22.61 o
  -7   3   6     3394.87     3578.33     32.79 o
  -5   3   6      630.91      548.50     68.44 o
  -3   3   6       18.44       12.62      3.43 o
  -1   3   6     1978.37     2143.94     31.01 o
   1   3   6     2652.20     2775.76     32.13 o
   3   3   6      425.86      447.62     12.30 o
   5   3   6      102.21       81.29      9.31 o
   7   3   6     1259.64     1232.80     27.16 o
   9   3   6      838.50      866.47     29.48 o
  11   3   6        3.83        9.38     10.93 o
  13   3   6       26.40        3.22     15.69 o
  15   3   6       16.30        7.68     18.25 o
  17   3   6        6.81       11.65     26.54 o
 -22   4   6        4.65        6.18     23.75 o
 -20   4   6        1.78       -3.61     17.06 o
 -18   4   6       65.79       53.07     16.06 o
 -16   4   6       42.43       39.73     13.27 o
 -14   4   6     2900.86     3009.59     57.93 o
 -12   4   6       30.52       10.29     10.51 o
 -10   4   6      184.70      171.38      9.92 o
  -8   4   6      272.51      224.17     38.94 o
  -6   4   6       42.92       40.28      7.35 o
  -4   4   6      114.22      119.20      9.29 o
  -2   4   6      873.83      897.53     21.48 o
   0   4   6       55.40       62.53      7.85 o
   2   4   6     4387.24     4791.49     65.01 o
   4   4   6      937.31      915.21     16.57 o
   6   4   6     2797.04     2655.04     45.81 o
   8   4   6      588.00      567.04     22.81 o
  10   4   6      266.31      233.18     22.39 o
  12   4   6     2113.69     1935.16     71.37 o
  14   4   6       20.28       17.22     18.88 o
  16   4   6      145.34      117.14     27.36 o
 -23   5   6      326.64      311.16     46.57 o
 -21   5   6       17.49       -1.74     18.29 o
 -19   5   6      391.34      323.69     85.43 o
 -17   5   6      327.40      286.02     29.59 o
 -15   5   6      861.15      850.67     34.81 o
 -13   5   6       95.42       99.29     16.28 o
 -11   5   6      842.99      855.43     21.59 o
  -9   5   6      775.07      845.10     22.31 o
  -7   5   6      332.68      369.50     34.51 o
  -5   5   6       77.77       74.72      8.70 o
  -3   5   6       13.29       16.54      7.03 o
  -1   5   6     2711.15     2854.43     42.60 o
   1   5   6     1559.24     1589.98     29.38 o
   3   5   6      316.76      312.90     13.38 o
   5   5   6     1088.50     1109.09     29.44 o
   7   5   6      221.39      201.48     20.80 o
   9   5   6     1685.47     1624.95     47.99 o
  11   5   6      205.07      202.12     28.05 o
  13   5   6      534.05      598.75     43.73 o
  15   5   6       51.23       37.33     22.77 o
 -22   6   6       14.22       11.10     21.37 o
 -20   6   6       16.52       -2.70     19.34 o
 -18   6   6        1.73       -3.56     15.38 o
 -16   6   6       68.35       70.51     20.51 o
 -14   6   6      488.46      503.38     28.73 o
 -12   6   6       13.25       12.82      6.97 o
 -10   6   6     1277.22     1273.04     28.24 o
  -8   6   6       24.32       11.51      7.44 o
  -6   6   6      804.63      813.54     22.60 o
  -4   6   6     1098.57     1218.63     31.42 o
  -2   6   6     1326.76     1292.03     29.45 o
   0   6   6       33.17       17.42      7.97 o
   2   6   6        0.48        0.14      6.83 o
   4   6   6      434.65      465.52     25.64 o
   6   6   6     1464.37     1408.14     36.05 o
   8   6   6      415.50      403.19     28.01 o
  10   6   6       76.34       48.36     19.80 o
  12   6   6      443.08      454.68     39.94 o
  14   6   6       33.42       14.61     19.47 o
 -21   7   6        2.16       -4.66     27.09 o
 -19   7   6      182.26      193.92     31.20 o
 -17   7   6        0.56       20.71     17.85 o
 -15   7   6      377.12      384.03     33.90 o
 -13   7   6      189.00      205.10     21.08 o
 -11   7   6      646.54      668.62     22.07 o
  -9   7   6     2283.56     2250.55     39.75 o
  -7   7   6      168.59      168.79     14.10 o
  -5   7   6      222.02      217.07     16.58 o
  -3   7   6      577.47      614.16     23.33 o
  -1   7   6        6.90        3.13      7.96 o
   1   7   6      973.18      956.18     26.79 o
   3   7   6      931.37      887.23     31.09 o
   5   7   6       39.26       49.17     15.69 o
   7   7   6     1053.45     1057.47     41.83 o
   9   7   6      309.88      305.19     32.87 o
  11   7   6      235.05      189.21     29.15 o
  13   7   6     1000.87     1078.81     58.98 o
 -20   8   6       12.34       -2.24     28.05 o
 -18   8   6      105.04       97.45     25.86 o
 -16   8   6     1011.90     1067.17     54.36 o
 -14   8   6      361.46      322.70     32.57 o
 -12   8   6      384.33      415.61     33.83 o
 -10   8   6      812.38      837.02     30.63 o
  -8   8   6       36.71       22.06      9.10 o
  -6   8   6      926.19      874.54     26.93 o
  -4   8   6      176.49      155.16     16.60 o
  -2   8   6     3297.61     3315.14     52.54 o
   0   8   6     3262.51     3194.47     50.44 o
   2   8   6       91.89       77.14     14.07 o
   4   8   6       60.38       62.47     16.10 o
   6   8   6       90.58      101.91     19.10 o
   8   8   6      246.14      235.03     30.00 o
  10   8   6      109.34       53.03     20.79 o
  12   8   6      112.46      100.08     27.31 o
 -17   9   6        7.68      -17.16     17.16 o
 -15   9   6      434.57      549.08     43.19 o
 -13   9   6       19.33        2.02     15.25 o
 -11   9   6       66.21       60.08     19.98 o
  -9   9   6       47.43       47.73     12.95 o
  -7   9   6      111.80      115.52     14.52 o
  -5   9   6     3212.46     2560.91    339.28 o
  -3   9   6      584.56      616.56     26.80 o
  -1   9   6      127.61      124.57     15.10 o
   1   9   6      552.38      511.18     31.86 o
   3   9   6     1505.61     1340.52     48.24 o
   5   9   6      416.75      385.02     30.29 o
   7   9   6      180.82      188.25     29.14 o
   9   9   6      246.09      286.05     35.51 o
  11   9   6       21.02       40.47     21.92 o
 -16  10   6       53.14       52.43     23.70 o
 -14  10   6       15.24        4.43     18.64 o
 -12  10   6      454.99      481.81     40.42 o
 -10  10   6      169.49      178.49     27.86 o
  -8  10   6      270.96      293.90     23.51 o
  -6  10   6       17.96       19.84     11.31 o
  -4  10   6      132.69      131.17     18.33 o
  -2  10   6      180.97      253.66     22.04 o
   0  10   6       19.81       21.96     14.58 o
   2  10   6      265.78      282.68     27.86 o
   4  10   6       36.07       47.60     17.16 o
   6  10   6      714.54      720.76     48.23 o
   8  10   6      100.81       84.67     24.57 o
 -13  11   6       18.55        0.39     18.62 o
 -11  11   6       19.54        3.42     18.21 o
  -9  11   6       20.79       20.55     18.39 o
  -7  11   6        0.15        4.34     12.39 o
  -5  11   6        4.35        1.16     10.92 o
  -3  11   6       35.77       29.29     15.06 o
  -1  11   6        0.77       -6.43     13.21 o
   1  11   6       58.44       58.61     18.70 o
   3  11   6        6.20        2.12     15.14 o
   5  11   6      103.49      116.37     27.22 o
   7  11   6        7.66        7.23     19.22 o
 -10  12   6      116.39      125.64     29.48 o
  -8  12   6       27.80       26.74     20.92 o
  -6  12   6       76.04       81.47     21.46 o
  -4  12   6       47.92       54.74     16.51 o
  -2  12   6        1.85       12.31     16.03 o
   0  12   6       29.48       29.82     17.89 o
   2  12   6        0.10        9.37     17.26 o
   4  12   6       10.72        2.85     19.87 o
 -23   1   7        0.82        1.94     17.10 o
 -21   1   7       29.45       29.99     16.52 o
 -19   1   7     1035.18     1122.72     66.37 o
 -17   1   7      930.49      842.13     31.34 o
 -15   1   7    12803.06    12916.12    156.63 o
 -13   1   7      254.92      313.32     13.81 o
 -11   1   7        0.01       11.59      9.69 o
  -9   1   7      474.14      474.06     19.72 o
  -7   1   7        0.24        0.45      2.85 o
  -5   1   7     1394.47     1282.94     18.31 o
  -3   1   7     2268.29     2423.47     30.30 o
  -1   1   7      451.23      418.31     10.91 o
   1   1   7    16183.75    17295.65    165.21 o
   3   1   7      864.69      743.76     54.98 o
   5   1   7     1434.44     1459.03     28.87 o
   7   1   7       16.13       21.58     12.65 o
   9   1   7       59.75       71.47     11.25 o
  11   1   7     5717.16     5822.23     87.87 o
  13   1   7      525.08      519.88     29.67 o
  15   1   7       57.01       46.56     36.02 o
 -24   2   7       14.56       17.66     26.64 o
 -22   2   7      127.02      154.70     27.35 o
 -20   2   7       55.56       61.39     21.03 o
 -18   2   7      211.78      199.92     21.24 o
 -16   2   7     5131.74     5090.07     92.44 o
 -14   2   7       26.50       30.75      6.60 o
 -12   2   7      759.25      823.27     21.24 o
 -10   2   7     2957.21     2949.93     31.96 o
  -8   2   7     2623.81     2683.39     42.51 o
  -6   2   7       39.74       36.90      4.85 o
  -4   2   7       13.21       15.62      3.86 o
  -2   2   7       72.66      108.21      6.64 o
   0   2   7      939.00     1001.37     18.27 o
   2   2   7     1103.67     1148.56     21.93 o
   4   2   7      195.65      179.99     12.18 o
   6   2   7       15.97       17.76      8.06 o
   8   2   7       26.67       33.69      9.56 o
  10   2   7        2.77        8.96      9.41 o
  12   2   7      333.60      343.28     24.65 o
  14   2   7       71.75       77.04     23.13 o
  16   2   7        3.38      -14.03     30.61 o
 -23   3   7       68.04       88.46     32.00 o
 -21   3   7        7.85        3.88     21.06 o
 -19   3   7      736.59      750.52     36.06 o
 -17   3   7      110.60      102.21     17.09 o
 -15   3   7     1803.85     1743.87     52.83 o
 -13   3   7        3.26        8.34      4.91 o
 -11   3   7      325.05      348.12     13.34 o
  -9   3   7       38.31       30.31      6.15 o
  -7   3   7      771.40      687.61     48.79 o
  -5   3   7     1431.24     1462.54     21.79 o
  -3   3   7     5756.67     5967.63     47.25 o
  -1   3   7     2406.31     2682.63     45.09 o
   1   3   7        0.50        7.66      5.52 o
   3   3   7      595.84      558.58     17.69 o
   5   3   7      539.24      547.95     19.91 o
   7   3   7     2908.87     2835.50     42.63 o
   9   3   7      440.57      464.65     24.23 o
  11   3   7     1031.84     1012.59     38.33 o
  13   3   7      383.20      384.50     40.48 o
  15   3   7       13.02       13.91     19.70 o
 -22   4   7        6.05       13.84     24.29 o
 -20   4   7        4.65      -11.80     15.93 o
 -18   4   7       16.42       30.96     14.60 o
 -16   4   7      112.49      104.23     17.07 o
 -14   4   7       53.47       39.04     10.48 o
 -12   4   7      225.52      297.04     10.59 o
 -10   4   7      835.95      764.60    100.95 o
  -8   4   7      701.67      737.49     20.55 o
  -6   4   7     2155.73     1976.22    194.40 o
  -4   4   7     6962.14     6975.13     74.63 o
  -2   4   7     3416.83     3548.22     39.86 o
   0   4   7     1087.51     1159.99     25.46 o
   2   4   7     5876.29     5601.31    189.76 o
   4   4   7       16.71       20.60      6.34 o
   6   4   7       93.94       90.69     13.42 o
   8   4   7      899.32      819.47     27.79 o
  10   4   7      138.14      154.70     18.97 o
  12   4   7      379.88      409.29     36.57 o
  14   4   7       31.46       28.00     20.33 o
 -23   5   7      104.84      125.79     35.86 o
 -21   5   7      145.51      142.98     28.06 o
 -19   5   7      181.38      172.77     26.43 o
 -17   5   7      142.94      157.64     20.75 o
 -15   5   7      199.60      208.88     20.95 o
 -13   5   7      695.31      715.02     31.70 o
 -11   5   7      207.62      247.52     14.40 o
  -9   5   7      849.86      799.63     61.49 o
  -7   5   7      657.91      664.19     20.96 o
  -5   5   7     1112.46     1212.52     25.80 o
  -3   5   7     1580.60     1690.72     29.95 o
  -1   5   7     4416.58     4378.06     49.98 o
   1   5   7     1067.35     1049.73     25.66 o
   3   5   7        5.19        0.25      7.07 o
   5   5   7     2120.96     2106.99     41.11 o
   7   5   7      270.00      217.43     20.19 o
   9   5   7      399.07      407.61     28.53 o
  11   5   7       20.35        4.35     17.66 o
  13   5   7       26.11       19.22     18.63 o
  15   5   7       49.99       50.43     24.72 o
 -22   6   7        3.62       22.09     20.24 o
 -20   6   7       53.00       34.26     21.47 o
 -18   6   7       24.76        3.61     16.00 o
 -16   6   7       19.26       36.31     14.83 o
 -14   6   7      346.36      351.02     25.20 o
 -12   6   7      949.53      893.00     24.49 o
 -10   6   7     1190.38     1229.99     29.13 o
  -8   6   7      417.11      298.27     50.06 o
  -6   6   7      551.76      513.52     34.37 o
  -4   6   7      268.14      323.38     15.14 o
  -2   6   7       21.68        6.04      6.01 o
   0   6   7       97.19       78.25     10.45 o
   2   6   7      294.75      302.74     15.60 o
   4   6   7     1291.00     1237.84     33.05 o
   6   6   7      206.18      185.81     20.77 o
   8   6   7       21.49       36.72     14.44 o
  10   6   7      195.71      188.29     28.77 o
  12   6   7       67.75       51.06     21.30 o
  14   6   7       35.14       54.91     23.75 o
 -21   7   7        0.10       15.39     20.91 o
 -19   7   7      553.35      640.74     45.65 o
 -17   7   7       20.41       20.32     17.84 o
 -15   7   7       24.58       -3.62     14.47 o
 -13   7   7       84.02       87.37     16.54 o
 -11   7   7       30.09       38.46      9.58 o
  -9   7   7        0.63       -0.87      7.46 o
  -7   7   7        3.47        2.85      7.50 o
  -5   7   7     1670.04     1624.36     46.03 o
  -3   7   7        9.88       12.38      8.74 o
  -1   7   7      228.22      222.45     15.93 o
   1   7   7     2076.45     2062.88     38.51 o
   3   7   7      590.42      554.16     26.42 o
   5   7   7       39.58       30.40     14.02 o
   7   7   7       25.27       11.31     13.53 o
   9   7   7       66.30       63.51     21.34 o
  11   7   7        3.05       15.36     18.51 o
  13   7   7       46.77       71.13     26.12 o
 -20   8   7        5.70        9.40     21.03 o
 -18   8   7       30.82       52.70     22.61 o
 -16   8   7      104.34      120.57     24.51 o
 -14   8   7      230.13      160.86     25.43 o
 -12   8   7     1852.02     1883.37     52.65 o
 -10   8   7      967.38     1030.30     34.35 o
  -8   8   7      374.50      364.31     20.19 o
  -6   8   7       51.64       70.41     11.43 o
  -4   8   7      306.00      283.19     18.98 o
  -2   8   7      279.58      250.23     18.00 o
   0   8   7       34.29       27.99      9.22 o
   2   8   7       25.55       23.25     11.25 o
   4   8   7        1.94       14.69     13.57 o
   6   8   7        1.75        2.92     12.36 o
   8   8   7      263.42      284.56     33.16 o
  10   8   7        8.54       -1.36     17.73 o
  12   8   7       67.33       56.69     24.60 o
 -17   9   7       46.92       53.82     22.92 o
 -15   9   7        0.22        6.16     16.52 o
 -13   9   7      135.99      133.69     25.45 o
 -11   9   7        1.67        2.94     11.77 o
  -9   9   7      377.84      379.48     24.51 o
  -7   9   7      324.05      345.02     21.27 o
  -5   9   7     1025.95     1002.78     32.78 o
  -3   9   7        6.98       13.27     11.03 o
  -1   9   7       17.84       16.78     11.16 o
   1   9   7       13.73        7.13     12.74 o
   3   9   7      365.56      367.63     29.27 o
   5   9   7       98.90      113.61     20.93 o
   7   9   7       30.98       30.22     18.05 o
   9   9   7        8.29       11.87     18.85 o
 -16  10   7      350.05      408.23     41.83 o
 -14  10   7       35.71       56.44     22.47 o
 -12  10   7      714.86      729.12     47.25 o
 -10  10   7        6.01        0.43     15.90 o
  -8  10   7      704.60      708.18     33.30 o
  -6  10   7       13.37        3.29      9.84 o
  -4  10   7      277.85      276.21     21.56 o
  -2  10   7      432.73      427.24     31.50 o
   0  10   7       12.57       13.20     14.17 o
   2  10   7      167.53      144.42     22.73 o
   4  10   7       11.84        2.37     13.94 o
   6  10   7        0.00       -7.52     16.51 o
   8  10   7       82.18      108.68     28.06 o
 -13  11   7      177.18      180.02     31.16 o
 -11  11   7        9.51       13.12     19.11 o
  -9  11   7      173.39      122.35     25.95 o
  -7  11   7      334.84      253.80     53.93 o
  -5  11   7       45.56       47.59     12.79 o
  -3  11   7       81.78       72.53     18.53 o
  -1  11   7      297.67      297.68     29.78 o
   1  11   7       59.69       59.13     19.71 o
   3  11   7        3.15       -9.56     14.42 o
   5  11   7      232.41      258.79     35.43 o
 -10  12   7      352.52      417.89     41.84 o
  -8  12   7        4.84       20.89     20.02 o
  -6  12   7      114.99      110.13     25.59 o
  -4  12   7        2.13       12.91     14.45 o
  -2  12   7       11.07        6.97     16.53 o
   0  12   7        0.55       -0.87     16.63 o
   2  12   7      133.42      197.69     29.36 o
 -24   0   8        0.01       -4.45     29.91 o
 -22   0   8        7.44       -0.95     26.42 o
 -20   0   8     1048.22      999.97    144.41 o
 -18   0   8      936.86      961.82     36.51 o
 -16   0   8     6387.97     6235.02    162.40 o
 -14   0   8     5835.69     5615.08    114.05 o
 -12   0   8      545.65      641.87     24.73 o
 -10   0   8      137.45      198.11     14.25 o
  -8   0   8      654.72      605.67     16.40 o
  -6   0   8      969.70      772.67     26.75 o
  -4   0   8      302.50      271.39     17.33 o
  -2   0   8    19302.90    20116.54    196.36 o
   0   0   8       18.91        6.78      6.90 o
   2   0   8      735.16      768.97     29.79 o
   4   0   8     7117.56     7036.90    110.93 o
   6   0   8     5912.09     5735.24     84.58 o
   8   0   8      923.95      862.59     37.97 o
  10   0   8       62.91       66.20     17.67 o
  12   0   8      785.37      758.70     47.04 o
  14   0   8       13.90       30.51     45.56 o
 -25   1   8       61.32       84.40     34.30 o
 -23   1   8       50.24       25.22     18.11 o
 -21   1   8       69.74       64.25     19.07 o
 -19   1   8      609.90      621.88     26.61 o
 -17   1   8     1214.02     1227.57     27.85 o
 -15   1   8      392.48      403.35     17.44 o
 -13   1   8      524.52      562.81     18.62 o
 -11   1   8      855.85      676.15     82.21 o
  -9   1   8      228.92      223.20      8.96 o
  -7   1   8     4181.00     4067.50     49.11 o
  -5   1   8     3776.92     3777.79     47.04 o
  -3   1   8      137.68      177.15      8.73 o
  -1   1   8     2909.27     2846.15     41.45 o
   1   1   8      103.03      115.25      9.40 o
   3   1   8      177.53      158.89     14.82 o
   5   1   8       55.93       49.57      9.75 o
   7   1   8      249.81      251.12     16.16 o
   9   1   8      119.39      108.24     13.22 o
  11   1   8       69.15       83.30     16.33 o
  13   1   8        0.06        6.89     17.01 o
  15   1   8      257.21      265.11     53.61 o
 -24   2   8       22.78       -4.42     25.73 o
 -22   2   8        6.58        2.72     17.75 o
 -20   2   8      316.01      270.56     29.85 o
 -18   2   8     1527.79     1222.08    259.40 o
 -16   2   8     1939.99     1917.85     38.92 o
 -14   2   8     2455.49     2490.65     35.40 o
 -12   2   8     2194.01     2257.67     32.72 o
 -10   2   8     1433.15     1494.06     22.51 o
  -8   2   8     1539.96     1613.59     20.28 o
  -6   2   8     1736.51     1854.31     31.05 o
  -4   2   8     1303.19     1389.30     21.33 o
  -2   2   8     1622.24     1934.61     22.58 o
   0   2   8     2533.28     2431.95     39.40 o
   2   2   8      281.35      280.81     13.28 o
   4   2   8      464.05      407.70     17.49 o
   6   2   8      345.39      286.05     16.55 o
   8   2   8      171.25      154.68     14.15 o
  10   2   8      386.99      385.33     25.52 o
  12   2   8      185.26      221.19     25.40 o
  14   2   8      308.29      275.87     33.36 o
 -23   3   8       82.49       58.72     38.17 o
 -21   3   8      408.54      483.59     37.63 o
 -19   3   8      150.90      110.86     19.20 o
 -17   3   8       51.90       84.90     17.09 o
 -15   3   8      191.99      160.99     27.06 o
 -13   3   8      647.07      676.20     19.64 o
 -11   3   8      468.21      446.09     15.20 o
  -9   3   8      392.35      406.32     13.31 o
  -7   3   8     3828.84     3387.98    245.95 o
  -5   3   8       23.24       28.42      5.39 o
  -3   3   8     5157.42     5135.90     61.47 o
  -1   3   8      465.43      410.59     14.39 o
   1   3   8     1479.07     1506.71     26.28 o
   3   3   8     2126.86     1809.11    170.80 o
   5   3   8     4193.02     4002.77     49.87 o
   7   3   8     1717.03     1706.38     34.02 o
   9   3   8      549.52      548.40     28.64 o
  11   3   8      262.60      274.95     27.28 o
  13   3   8        1.23       -2.16     17.33 o
  15   3   8      205.31      133.87     46.96 o
 -24   4   8       58.57       61.72     32.17 o
 -22   4   8      253.66      265.20     40.63 o
 -20   4   8       78.07       88.64     19.82 o
 -18   4   8        0.63       -6.63     10.95 o
 -16   4   8      366.95      407.67     26.67 o
 -14   4   8      105.27       79.16      9.56 o
 -12   4   8     1330.87     1228.03    105.18 o
 -10   4   8      352.34      375.50     15.63 o
  -8   4   8     4408.58     4331.25     63.18 o
  -6   4   8      402.35      362.01     24.98 o
  -4   4   8       42.41       37.55      7.51 o
  -2   4   8       51.66       22.03      7.10 o
   0   4   8      483.63      447.53     16.18 o
   2   4   8      436.29      375.07     16.40 o
   4   4   8       63.90       74.53      9.70 o
   6   4   8     1007.04      975.55     32.34 o
   8   4   8     2174.05     2137.27     55.77 o
  10   4   8      210.87      203.39     21.28 o
  12   4   8      266.34      281.67     33.49 o
  14   4   8        1.77        5.40     19.92 o
 -23   5   8      380.18      406.00     49.30 o
 -21   5   8        4.28       -7.24     17.69 o
 -19   5   8       49.28       67.87     21.33 o
 -17   5   8        7.96      -11.29     11.29 o
 -15   5   8      163.87      170.90     19.84 o
 -13   5   8       22.08       12.64      7.78 o
 -11   5   8      586.23      608.02     34.14 o
  -9   5   8      106.30      114.47     10.75 o
  -7   5   8      288.93      302.90     20.56 o
  -5   5   8      280.68      204.69     12.50 o
  -3   5   8      342.17      303.92     14.10 o
  -1   5   8      102.30       83.24     10.29 o
   1   5   8     1724.67     1696.51     72.76 o
   3   5   8      155.71      148.89     12.76 o
   5   5   8     4450.87     4179.15     63.24 o
   7   5   8      211.95      194.62     20.08 o
   9   5   8        8.67        1.48     12.74 o
  11   5   8        0.00       -3.20     16.02 o
  13   5   8       48.02       41.91     22.28 o
 -22   6   8       16.86        3.61     20.81 o
 -20   6   8        9.48        9.44     18.00 o
 -18   6   8       75.74       79.17     21.60 o
 -16   6   8      671.46      647.44     33.97 o
 -14   6   8        0.33        1.21     11.21 o
 -12   6   8       52.67       59.05     10.34 o
 -10   6   8      914.51      903.04     49.37 o
  -8   6   8       81.03       66.44      9.38 o
  -6   6   8     1280.87     1200.33     26.56 o
  -4   6   8       13.24       17.60      8.17 o
  -2   6   8     1768.50     1744.28     33.63 o
   0   6   8     2364.55     1866.56    249.93 o
   2   6   8     1070.16     1034.76     26.31 o
   4   6   8      183.99      187.78     16.54 o
   6   6   8        1.61      -10.47     11.53 o
   8   6   8      329.70      316.53     27.44 o
  10   6   8        1.13        5.13     16.23 o
  12   6   8       89.09       76.05     25.73 o
 -21   7   8        8.13       -0.44     20.24 o
 -19   7   8      144.40      160.59     28.56 o
 -17   7   8      575.42      596.74     41.43 o
 -15   7   8       29.90       14.51     13.03 o
 -13   7   8        0.96       -2.96     11.07 o
 -11   7   8       50.43       59.06     10.90 o
  -9   7   8       98.53       75.59     14.01 o
  -7   7   8       29.38       22.28      8.44 o
  -5   7   8      808.31      797.35     25.45 o
  -3   7   8        0.93        3.97      7.13 o
  -1   7   8       76.34       72.14     11.93 o
   1   7   8        2.62        4.41      9.98 o
   3   7   8      780.65      754.83     30.60 o
   5   7   8      356.87      285.90     25.76 o
   7   7   8      660.72      654.21     37.14 o
   9   7   8        0.79      -11.39     15.33 o
  11   7   8      551.10      547.75     45.54 o
 -20   8   8        0.02       15.12     20.94 o
 -18   8   8      394.79      386.06     38.53 o
 -16   8   8        1.59        5.96     16.36 o
 -14   8   8      111.30      109.22     23.03 o
 -12   8   8      116.20      131.14     19.34 o
 -10   8   8      501.48      528.72     23.84 o
  -8   8   8        0.50        1.81      7.62 o
  -6   8   8       38.92       19.09      9.19 o
  -4   8   8     2821.21     2746.98     46.73 o
  -2   8   8     1189.68     1155.24     33.11 o
   0   8   8      664.63      625.07     29.56 o
   2   8   8       95.12      107.45     19.03 o
   4   8   8       44.77       22.12     14.35 o
   6   8   8       56.33       52.96     17.85 o
   8   8   8        4.82       -1.46     16.41 o
  10   8   8       76.96       63.34     24.81 o
 -19   9   8      203.36      233.73     35.47 o
 -17   9   8      406.45      471.64     42.47 o
 -15   9   8       32.76       38.02     19.72 o
 -13   9   8        2.99       -3.22     15.61 o
 -11   9   8      395.19      439.91     30.34 o
  -9   9   8      922.00      927.23     35.54 o
  -7   9   8     1269.41     1205.89     33.94 o
  -5   9   8        0.21        0.53      8.46 o
  -3   9   8      187.19      186.52     19.31 o
  -1   9   8       39.82       30.23     13.02 o
   1   9   8     1322.90     1295.65     48.52 o
   3   9   8        6.88       -1.05     13.24 o
   5   9   8       61.34       61.50     18.77 o
   7   9   8      311.49      324.81     36.59 o
   9   9   8       73.23       59.62     23.82 o
 -16  10   8      325.08      318.20     37.90 o
 -14  10   8      431.03      435.34     40.26 o
 -12  10   8       35.54        7.60     17.51 o
 -10  10   8      205.59      220.52     25.12 o
  -8  10   8      433.93      424.84     32.12 o
  -6  10   8       80.15       80.10     14.38 o
  -4  10   8      287.75      344.47     23.62 o
  -2  10   8       37.98       48.47     16.86 o
   0  10   8       70.55       51.24     17.57 o
   2  10   8        7.79        9.83     15.08 o
   4  10   8       10.65        9.21     15.26 o
   6  10   8      128.13      131.59     28.05 o
 -13  11   8        2.56       -2.21     17.84 o
 -11  11   8       58.23       56.15     22.39 o
  -9  11   8      124.18      115.92     25.56 o
  -7  11   8        0.96        3.41     12.59 o
  -5  11   8       63.60       78.24     19.38 o
  -3  11   8      115.09      139.64     23.81 o
  -1  11   8       98.82       91.42     21.32 o
   1  11   8       24.72        8.24     16.15 o
   3  11   8      152.59      154.83     26.36 o
   5  11   8       56.67       57.93     24.62 o
 -10  12   8       10.59       -9.70     18.64 o
  -8  12   8      136.19       99.16     26.29 o
  -6  12   8       69.96       62.34     17.95 o
  -4  12   8       22.02       18.75     16.43 o
  -2  12   8       30.14       10.96     16.84 o
   0  12   8      374.16      436.28     37.29 o
 -25   1   9        7.83       -1.65     19.12 o
 -23   1   9       77.97       40.88     21.52 o
 -21   1   9      407.95      363.05     33.87 o
 -19   1   9        1.39        5.03      9.02 o
 -17   1   9      796.07      783.84     23.81 o
 -15   1   9      429.45      421.54     18.17 o
 -13   1   9       77.58       57.48     10.94 o
 -11   1   9      136.22      140.58      9.06 o
  -9   1   9     1097.42      963.01     39.14 o
  -7   1   9        1.84        5.20      4.33 o
  -5   1   9     1646.90     1836.98     27.47 o
  -3   1   9     7034.08     7856.95     67.21 o
  -1   1   9     1428.60     1539.43     22.06 o
   1   1   9     3887.19     4030.82     42.72 o
   3   1   9       27.98       27.10      7.11 o
   5   1   9      845.26      788.88     24.96 o
   7   1   9     2015.20     1919.70     38.53 o
   9   1   9      435.78      486.59     22.74 o
  11   1   9       24.79       31.09     14.18 o
  13   1   9      127.21      130.75     30.84 o
 -24   2   9       20.57       15.72     26.33 o
 -22   2   9      628.68      595.13     41.86 o
 -20   2   9     1335.69     1307.84     51.50 o
 -18   2   9      453.52      406.57     23.24 o
 -16   2   9      100.79      107.92     11.43 o
 -14   2   9      623.18      565.81     31.71 o
 -12   2   9      161.14      143.31     10.55 o
 -10   2   9        0.11        0.33      5.16 o
  -8   2   9     1554.34     1495.99     21.09 o
  -6   2   9     2263.26     2299.00     25.66 o
  -4   2   9     2393.19     2377.62     28.76 o
  -2   2   9      125.23      141.43      8.84 o
   0   2   9     3988.72     3819.85     43.86 o
   2   2   9     1162.85      937.60     82.18 o
   4   2   9       13.77        8.91      7.78 o
   6   2   9     2180.95     2039.87     38.37 o
   8   2   9      134.29      132.41     13.98 o
  10   2   9      128.29      141.23     21.19 o
  12   2   9      142.11      183.41     28.24 o
  14   2   9        6.24       13.28     19.01 o
 -23   3   9        2.69        5.76     25.93 o
 -21   3   9       15.04        2.27     14.82 o
 -19   3   9       31.88       33.82     15.36 o
 -17   3   9        6.40        9.93      7.53 o
 -15   3   9        0.58        8.89      6.99 o
 -13   3   9      419.81      439.67     16.32 o
 -11   3   9     1125.42     1085.81     22.71 o
  -9   3   9      290.33      273.66     11.56 o
  -7   3   9      373.02      352.15     11.71 o
  -5   3   9       12.21       20.63      5.28 o
  -3   3   9     2138.59     2353.81     28.46 o
  -1   3   9      157.85      143.61     10.53 o
   1   3   9     1276.01     1234.38     40.74 o
   3   3   9     2330.13     2373.61     35.83 o
   5   3   9     1091.40      972.32     26.85 o
   7   3   9       15.00       24.02     10.86 o
   9   3   9       82.51       81.75     18.54 o
  11   3   9       58.45       73.57     19.53 o
  13   3   9       18.58       42.07     22.11 o
 -24   4   9      166.52      243.71     42.80 o
 -22   4   9       12.08        4.88     24.47 o
 -20   4   9      588.67      605.84     35.15 o
 -18   4   9        6.90       -1.06     11.76 o
 -16   4   9       15.03       13.49      9.85 o
 -14   4   9     1069.07      994.13     25.04 o
 -12   4   9        0.81       -1.56      5.83 o
 -10   4   9     2126.65     2212.31     34.64 o
  -8   4   9      158.44      186.66     11.76 o
  -6   4   9      341.26      363.32     13.45 o
  -4   4   9      151.81      144.43     10.22 o
  -2   4   9      681.79      638.98     54.53 o
   0   4   9      741.93      806.30     21.52 o
   2   4   9      494.75      500.11     18.41 o
   4   4   9     1601.39     1635.57     30.63 o
   6   4   9      210.81      218.45     17.95 o
   8   4   9      214.94      260.85     32.22 o
  10   4   9       50.95       51.29     18.22 o
  12   4   9       15.58        6.80     18.14 o
 -23   5   9       20.68       14.14     34.46 o
 -21   5   9      387.37      368.12     35.63 o
 -19   5   9      253.61      265.21     25.96 o
 -17   5   9        8.44       19.90     13.74 o
 -15   5   9       65.18       61.15     15.04 o
 -13   5   9       74.11       79.68      9.46 o
 -11   5   9      100.15       79.83     10.51 o
  -9   5   9      334.50      390.49     17.27 o
  -7   5   9      105.90       71.49      9.27 o
  -5   5   9        1.17        0.72      5.44 o
  -3   5   9       58.20       72.20     10.18 o
  -1   5   9       91.58       86.10     10.98 o
   1   5   9     3789.02     3651.30     47.49 o
   3   5   9      801.53      659.78     61.74 o
   5   5   9      581.91      506.57     26.07 o
   7   5   9     1225.60     1043.25     38.97 o
   9   5   9      664.41      583.26     36.98 o
  11   5   9      195.71      220.08     31.28 o
  13   5   9        0.15      -21.48     21.48 o
 -22   6   9        0.26      -11.41     19.71 o
 -20   6   9      427.61      590.54     64.37 o
 -18   6   9      454.82      489.64     38.09 o
 -16   6   9      209.59      203.77     22.29 o
 -14   6   9      103.30      120.63     18.18 o
 -12   6   9      140.11      146.51     13.44 o
 -10   6   9       51.84       31.92      8.81 o
  -8   6   9      319.86      310.42     16.87 o
  -6   6   9     1529.30     1465.34     31.78 o
  -4   6   9      314.52      312.65     15.75 o
  -2   6   9     1259.21     1190.38     29.27 o
   0   6   9       48.13       45.15     10.22 o
   2   6   9      908.54      744.38     85.98 o
   4   6   9       31.22       24.03     12.12 o
   6   6   9       60.42       61.01     15.39 o
   8   6   9      384.51      422.58     37.52 o
  10   6   9      131.28      118.51     27.08 o
  12   6   9       46.32       45.09     23.15 o
 -21   7   9      639.36      658.83     51.82 o
 -19   7   9        2.66       13.47     18.41 o
 -17   7   9       75.82       57.08     20.15 o
 -15   7   9       30.17       34.03     15.27 o
 -13   7   9      106.73       92.93     17.84 o
 -11   7   9      347.50      292.39     18.28 o
  -9   7   9       40.55       46.41     10.87 o
  -7   7   9     2230.66     2098.76     37.26 o
  -5   7   9     2492.80     2302.88     39.22 o
  -3   7   9     1568.10     1495.74     30.13 o
  -1   7   9       15.65       16.24      8.26 o
   1   7   9       24.29        7.98      9.48 o
   3   7   9      264.57      218.10     23.34 o
   5   7   9       33.24       36.32     15.38 o
   7   7   9        3.82       -7.62     13.38 o
   9   7   9        9.61       -0.38     16.49 o
  11   7   9        0.13      -11.95     18.95 o
 -20   8   9       59.11       94.45     27.17 o
 -18   8   9      175.46      200.62     30.70 o
 -16   8   9        0.10        3.38     16.10 o
 -14   8   9      711.89      758.78     37.59 o
 -12   8   9      556.90      519.95     31.72 o
 -10   8   9     1034.39      942.35     30.64 o
  -8   8   9      126.05      129.11     15.10 o
  -6   8   9      357.32      314.73     20.40 o
  -4   8   9        0.25       -2.71      8.66 o
  -2   8   9      280.65      226.52     38.06 o
   0   8   9      212.53      175.01     19.31 o
   2   8   9      210.41      204.49     23.90 o
   4   8   9       67.79       93.47     19.49 o
   6   8   9       96.06       69.43     19.76 o
   8   8   9       92.89       68.32     24.36 o
  10   8   9       75.74      101.14     28.46 o
 -19   9   9       13.16       -8.18     19.46 o
 -17   9   9       66.16       68.56     24.29 o
 -15   9   9       10.59       14.43     17.13 o
 -13   9   9       11.97        6.14     16.42 o
 -11   9   9        7.06        2.71     10.93 o
  -9   9   9      139.99       80.84     19.05 o
  -7   9   9      178.83      186.04     16.66 o
  -5   9   9      149.34      112.07     15.53 o
  -3   9   9      242.75      233.04     21.30 o
  -1   9   9        1.86       -2.90     11.94 o
   1   9   9      274.72      313.51     28.42 o
   3   9   9       31.12       26.34     16.38 o
   5   9   9      154.21      194.59     26.12 o
   7   9   9       34.55       30.38     20.73 o
 -16  10   9        8.17        7.21     18.73 o
 -14  10   9      538.98      563.13     44.17 o
 -12  10   9      233.77      238.40     31.63 o
 -10  10   9      263.64      251.28     23.52 o
  -8  10   9       48.79       32.82     12.84 o
  -6  10   9       19.26       27.35     11.11 o
  -4  10   9       80.40       83.41     18.40 o
  -2  10   9       65.96       78.43     18.78 o
   0  10   9      127.07      161.81     24.25 o
   2  10   9       34.57       31.63     17.33 o
   4  10   9      298.02      331.25     32.76 o
   6  10   9      112.66       95.25     26.40 o
 -13  11   9       17.99       19.81     20.62 o
 -11  11   9        4.50      -14.24     16.75 o
  -9  11   9      201.59      235.87     24.76 o
  -7  11   9       73.39       76.33     16.50 o
  -5  11   9      102.40      122.00     22.79 o
  -3  11   9       81.61       91.19     21.39 o
  -1  11   9      144.93      134.49     24.59 o
   1  11   9      269.42      340.14     33.55 o
   3  11   9      474.98      529.77     40.16 o
  -8  12   9       72.85       62.81     24.07 o
  -6  12   9        0.17        7.90     15.17 o
  -4  12   9        3.32        2.08     16.49 o
  -2  12   9       65.24      111.45     25.19 o
 -24   0  10       45.59       36.58     24.73 o
 -22   0  10        5.99        3.83     20.64 o
 -20   0  10      701.80      681.07     38.94 o
 -18   0  10       28.05       39.44     15.62 o
 -16   0  10      987.92     1005.54     37.98 o
 -14   0  10      291.23      227.39     20.18 o
 -12   0  10        8.28        2.91      8.05 o
 -10   0  10     1597.37     1735.79     39.47 o
  -8   0  10       40.27       26.61     11.67 o
  -6   0  10       22.69       52.21     11.78 o
  -4   0  10     6090.26     5905.25     80.10 o
  -2   0  10     1784.55     1859.50     32.64 o
   0   0  10       11.90       17.62     10.74 o
   2   0  10       63.77       48.53     14.17 o
   4   0  10      785.19      539.47    219.63 o
   6   0  10     5941.81     5630.56    100.99 o
   8   0  10      470.50      466.39     32.65 o
  10   0  10        4.43       24.48     16.57 o
  12   0  10      285.38      291.84     45.74 o
 -25   1  10       50.50       43.13     20.30 o
 -23   1  10      218.88      205.83     30.82 o
 -21   1  10      726.00      657.68     41.79 o
 -19   1  10       27.52       31.54     13.14 o
 -17   1  10       26.66       13.98      8.86 o
 -15   1  10      847.71      827.33     23.06 o
 -13   1  10      190.77      174.48     15.91 o
 -11   1  10     2449.81     2432.77     26.88 o
  -9   1  10     1514.62     1555.53     23.02 o
  -7   1  10      331.02      312.78     14.91 o
  -5   1  10     2158.83     1970.32     24.47 o
  -3   1  10       49.64       62.50      6.89 o
  -1   1  10      305.65      311.72     13.17 o
   1   1  10     3779.03     3532.47     42.61 o
   3   1  10       72.88       91.43     12.08 o
   5   1  10       44.17       52.50     11.20 o
   7   1  10      116.40      120.20     14.35 o
   9   1  10        2.71        6.05      9.79 o
  11   1  10       49.57       55.24     18.42 o
  13   1  10       10.42       26.08     23.48 o
 -24   2  10       20.47       40.91     22.93 o
 -22   2  10      566.40      492.13     84.89 o
 -20   2  10      758.42      732.32     35.99 o
 -18   2  10       61.13       95.84     19.59 o
 -16   2  10      181.03      187.65     13.91 o
 -14   2  10      247.80      243.02     14.60 o
 -12   2  10      588.14      602.51     18.65 o
 -10   2  10      331.41      339.33     12.20 o
  -8   2  10      861.72      883.02     18.88 o
  -6   2  10     1431.55     1590.64     24.42 o
  -4   2  10      269.76      281.84     12.38 o
  -2   2  10      160.22      180.61     10.29 o
   0   2  10     1561.52     1510.26     28.38 o
   2   2  10     1715.06     1603.93     30.62 o
   4   2  10      337.74      310.53     17.67 o
   6   2  10     5712.21     5396.94     63.76 o
   8   2  10      502.83      506.44     25.96 o
  10   2  10      361.00      352.78     29.32 o
  12   2  10       57.11       66.11     23.19 o
 -25   3  10      129.37      140.11     55.39 o
 -23   3  10      260.39      237.65     32.13 o
 -21   3  10      487.09      459.35     32.12 o
 -19   3  10        1.70       -3.98     11.97 o
 -17   3  10     1345.48     1222.85     79.79 o
 -15   3  10       19.19       17.75      8.89 o
 -13   3  10       17.24       11.68      7.14 o
 -11   3  10      922.90      967.07     56.47 o
  -9   3  10      948.64      872.37     18.65 o
  -7   3  10      112.55      111.77      8.76 o
  -5   3  10     1932.24     1947.48     25.16 o
  -3   3  10      250.00      287.20     12.47 o
  -1   3  10     5281.81     5145.68     50.02 o
   1   3  10      330.22      279.28     20.34 o
   3   3  10      670.88      683.01     22.11 o
   5   3  10      630.47      659.00     24.05 o
   7   3  10        0.54        4.08     11.04 o
   9   3  10       56.09       60.13     17.60 o
  11   3  10       37.90       38.98     21.18 o
  13   3  10        0.40       18.15     21.21 o
 -24   4  10      151.45      190.11     39.19 o
 -22   4  10      138.69      160.15     28.08 o
 -20   4  10       35.77       22.98     15.96 o
 -18   4  10       32.96       32.24     15.12 o
 -16   4  10      448.11      398.86     36.09 o
 -14   4  10      137.42      162.10     12.52 o
 -12   4  10        5.52        7.59      6.64 o
 -10   4  10      170.73      193.95     13.06 o
  -8   4  10       54.68       58.74      8.10 o
  -6   4  10     3975.25     4098.27     53.25 o
  -4   4  10        3.13       -4.02      6.26 o
  -2   4  10        0.00        1.56      6.63 o
   0   4  10      664.51      626.77     20.44 o
   2   4  10      696.00      539.39     19.98 o
   4   4  10     1527.68     1199.36    173.15 o
   6   4  10      214.34      207.61     19.69 o
   8   4  10      203.11      229.41     25.32 o
  10   4  10       58.47       60.96     19.77 o
  12   4  10       52.58       42.21     22.65 o
 -23   5  10       34.02       79.04     31.45 o
 -21   5  10        7.69        8.59     15.21 o
 -19   5  10        4.74       10.93     14.87 o
 -17   5  10       15.21       -2.19     12.19 o
 -15   5  10        8.06        4.30      9.00 o
 -13   5  10       19.85       20.98      9.16 o
 -11   5  10       93.87      122.65     12.77 o
  -9   5  10     2302.48     2416.34     38.88 o
  -7   5  10     2926.68     2662.73     90.19 o
  -5   5  10      155.21      146.94     13.48 o
  -3   5  10      470.58      493.47     22.83 o
  -1   5  10      501.80      488.32     20.49 o
   1   5  10      441.56      436.48     20.09 o
   3   5  10       31.32       12.29      8.79 o
   5   5  10        0.61        2.15     12.65 o
   7   5  10      474.79      459.72     32.00 o
   9   5  10      287.01      256.87     28.94 o
  11   5  10        0.39       17.84     20.61 o
 -22   6  10        7.36        1.23     20.83 o
 -20   6  10        2.87       21.97     19.89 o
 -18   6  10        0.35       -2.82     13.66 o
 -16   6  10      309.35      289.89     25.34 o
 -14   6  10      456.00      554.49     30.53 o
 -12   6  10      423.39      412.18     18.47 o
 -10   6  10      236.01      235.19     16.58 o
  -8   6  10       51.53       63.87     11.87 o
  -6   6  10      450.47      367.99     48.53 o
  -4   6  10     3855.42     3763.39     50.92 o
  -2   6  10      503.80      510.77     21.59 o
   0   6  10        0.98       -2.37      8.07 o
   2   6  10      665.99      592.92     28.31 o
   4   6  10      406.89      383.61     28.70 o
   6   6  10        2.26       -5.73     11.50 o
   8   6  10      174.19      170.33     28.96 o
  10   6  10       56.51       46.65     21.09 o
 -21   7  10       42.50       53.69     23.65 o
 -19   7  10       37.49       47.23     21.52 o
 -17   7  10      134.75      142.99     21.83 o
 -15   7  10     1436.63     1553.80     49.97 o
 -13   7  10      258.02      256.61     24.01 o
 -11   7  10        2.90        4.95      8.34 o
  -9   7  10     1068.36     1093.17     29.56 o
  -7   7  10     1248.38     1122.74     30.29 o
  -5   7  10      352.48      352.74     17.87 o
  -3   7  10        1.22       -7.20      7.20 o
  -1   7  10      311.93      329.24     18.05 o
   1   7  10      427.46      374.68     22.73 o
   3   7  10     1108.42     1242.00     42.86 o
   5   7  10        0.94        3.18     13.76 o
   7   7  10       95.05      134.00     28.17 o
   9   7  10        0.11       -1.32     18.06 o
 -20   8  10        5.53        5.62     20.58 o
 -18   8  10       80.46       70.74     23.05 o
 -16   8  10       38.31       27.59     17.90 o
 -14   8  10      161.60      181.64     22.58 o
 -12   8  10       49.66       62.56     14.20 o
 -10   8  10      725.29      746.86     28.76 o
  -8   8  10     1202.44     1205.81     35.42 o
  -6   8  10      361.04      340.74     21.34 o
  -4   8  10       48.21       63.29     11.72 o
  -2   8  10      215.49      203.50     22.60 o
   0   8  10      524.61      400.41    107.79 o
   2   8  10      710.28      678.84     38.07 o
   4   8  10       22.81       -3.09     13.91 o
   6   8  10       20.60       29.62     19.41 o
   8   8  10       47.39       61.12     25.91 o
 -19   9  10      105.11      120.89     29.57 o
 -17   9  10        0.14        6.51     18.43 o
 -15   9  10      300.50      315.98     34.45 o
 -13   9  10      109.78       68.94     18.01 o
 -11   9  10      116.42      103.07     17.51 o
  -9   9  10       55.62       61.82     15.07 o
  -7   9  10       77.05       75.24     12.54 o
  -5   9  10       22.81       17.90     10.90 o
  -3   9  10       82.26       52.95     15.93 o
  -1   9  10        4.94        0.20     12.03 o
   1   9  10       36.74       16.52     15.67 o
   3   9  10      248.68      272.51     29.40 o
   5   9  10        7.36        1.15     17.80 o
   7   9  10       51.20       38.35     22.94 o
 -16  10  10        3.02      -11.01     17.20 o
 -14  10  10       99.49      100.44     25.89 o
 -12  10  10      862.68      942.48     44.33 o
 -10  10  10        0.54       16.04     13.17 o
  -8  10  10      660.52      601.44     32.29 o
  -6  10  10       79.45       55.30     14.84 o
  -4  10  10       10.20       14.48     13.98 o
  -2  10  10      293.74      318.43     30.30 o
   0  10  10      620.25      703.12     41.82 o
   2  10  10        0.98       -8.31     14.29 o
   4  10  10      224.10      278.52     35.78 o
 -13  11  10        6.96        0.57     19.49 o
 -11  11  10       80.94      103.73     26.32 o
  -9  11  10        0.01        3.95     12.37 o
  -7  11  10       92.48      119.59     22.59 o
  -5  11  10        0.00        1.73     14.96 o
  -3  11  10       29.02       32.99     17.75 o
  -1  11  10      447.40      566.32     40.27 o
   1  11  10       32.71       41.42     19.89 o
  -6  12  10       69.18       98.22     21.50 o
  -4  12  10      239.39      262.04     31.41 o
 -25   1  11       70.97       80.86     22.10 o
 -23   1  11      817.90      867.25     43.88 o
 -21   1  11      362.07      375.77     30.44 o
 -19   1  11      633.66      687.91     27.86 o
 -17   1  11      290.17      290.42     16.19 o
 -15   1  11      303.86      271.16     15.38 o
 -13   1  11      369.83      405.01     16.53 o
 -11   1  11       26.35       27.89      6.70 o
  -9   1  11     3018.15     2929.27     36.75 o
  -7   1  11       57.59      101.22     10.83 o
  -5   1  11        0.86       -2.20      5.18 o
  -3   1  11      111.19      100.40      7.61 o
  -1   1  11        8.22        3.22      6.98 o
   1   1  11     7201.37     7016.72     65.90 o
   3   1  11     4531.55     4235.77     54.75 o
   5   1  11       10.56       10.83      7.62 o
   7   1  11       44.38       43.43     11.76 o
   9   1  11       97.95      116.72     21.24 o
  11   1  11       81.19       88.65     20.98 o
 -24   2  11       52.51       -2.22     17.66 o
 -22   2  11     1021.98      995.61     51.06 o
 -20   2  11       10.19       -0.23     13.43 o
 -18   2  11       28.97       26.56     12.02 o
 -16   2  11     1017.92     1017.07     29.72 o
 -14   2  11      693.53      660.40     31.69 o
 -12   2  11      284.41      274.13     12.34 o
 -10   2  11     1242.34     1269.21     24.62 o
  -8   2  11       91.54       93.61      8.57 o
  -6   2  11      580.78      548.37     16.26 o
  -4   2  11      328.77      305.51     14.13 o
  -2   2  11      315.77      318.75     13.72 o
   0   2  11      233.94      236.18     14.49 o
   2   2  11     2025.98     1904.46     37.12 o
   4   2  11      197.09      191.59     15.68 o
   6   2  11      199.28      193.72     16.59 o
   8   2  11       18.66       24.26     15.30 o
  10   2  11       19.80       27.19     16.19 o
  12   2  11        0.44        9.82     19.25 o
 -25   3  11      211.12      226.60     57.65 o
 -23   3  11      932.02      972.55     52.54 o
 -21   3  11       43.80       30.17     14.73 o
 -19   3  11      632.25      691.83     35.37 o
 -17   3  11        3.33        0.12      9.67 o
 -15   3  11        0.41       13.31      8.29 o
 -13   3  11       13.15        4.16      7.05 o
 -11   3  11      317.73      334.25     13.37 o
  -9   3  11     1818.16     1938.74     34.20 o
  -7   3  11      333.17      351.88     16.70 o
  -5   3  11       35.27       32.59      6.53 o
  -3   3  11      111.53      101.62      9.48 o
  -1   3  11        8.07        9.63      7.72 o
   1   3  11      114.63      105.43     12.16 o
   3   3  11      613.58      566.47     22.83 o
   5   3  11      105.15       49.95     14.45 o
   7   3  11        5.85        4.01     14.10 o
   9   3  11       71.90       66.35     18.94 o
  11   3  11      231.54      213.07     31.68 o
 -24   4  11        9.22        1.46     33.54 o
 -22   4  11       67.57       46.01     19.07 o
 -20   4  11      332.33      321.08     27.90 o
 -18   4  11       77.78       87.50     17.84 o
 -16   4  11      680.52      673.70     28.11 o
 -14   4  11     1292.66     1260.68     28.82 o
 -12   4  11     1208.23     1271.65     28.16 o
 -10   4  11       46.58       35.04      7.73 o
  -8   4  11      564.21      603.71     17.99 o
  -6   4  11      313.21      330.35     14.42 o
  -4   4  11       13.69        4.59      6.80 o
  -2   4  11     3604.36     3360.03     43.46 o
   0   4  11      894.43      854.24     26.10 o
   2   4  11     1749.52     1649.50     33.23 o
   4   4  11      386.18      340.30     23.25 o
   6   4  11        0.00        3.26     13.07 o
   8   4  11        0.03        5.07     13.96 o
  10   4  11      470.72      505.49     37.51 o
 -23   5  11      115.22      165.24     36.10 o
 -21   5  11      548.18      573.78     49.98 o
 -19   5  11       13.97       17.67     15.07 o
 -17   5  11       33.59       19.53     13.19 o
 -15   5  11      126.44      143.81     16.12 o
 -13   5  11        0.52        2.30      8.33 o
 -11   5  11     2578.82     2448.60     42.69 o
  -9   5  11      576.36      558.03     31.64 o
  -7   5  11      935.36      896.42     25.26 o
  -5   5  11     2715.73     2640.51     41.40 o
  -3   5  11      590.02      557.08     21.33 o
  -1   5  11      151.20      135.16     13.67 o
   1   5  11     2343.70     2332.62     39.03 o
   3   5  11      296.74      261.17     19.31 o
   5   5  11        0.23       -0.66     12.72 o
   7   5  11      184.37      190.96     24.42 o
   9   5  11       50.94       55.74     19.20 o
 -22   6  11      771.21      992.43     55.62 o
 -20   6  11       66.38       72.36     22.53 o
 -18   6  11        5.88       22.00     15.54 o
 -16   6  11      298.57      375.79     28.00 o
 -14   6  11      683.98      700.56     23.58 o
 -12   6  11      387.78      409.75     20.98 o
 -10   6  11      614.29      575.46     23.85 o
  -8   6  11       37.77       28.92      8.85 o
  -6   6  11      329.59      282.15     18.08 o
  -4   6  11      282.51      288.44     17.54 o
  -2   6  11     2480.03     2254.06     41.51 o
   0   6  11      119.59       80.75     14.75 o
   2   6  11      228.10      219.17     20.59 o
   4   6  11       41.44       11.17     16.54 o
   6   6  11      243.92      203.39     23.34 o
   8   6  11       16.68       19.30     17.35 o
  10   6  11       40.67       25.21     21.90 o
 -21   7  11      103.98      128.53     27.63 o
 -19   7  11      134.43      155.88     26.79 o
 -17   7  11       15.55       15.84     14.64 o
 -15   7  11       23.97       24.48     14.44 o
 -13   7  11       18.94       11.25     10.83 o
 -11   7  11       12.54       15.98      9.13 o
  -9   7  11      753.62      598.21     85.30 o
  -7   7  11     2376.07     1883.39    230.91 o
  -5   7  11       55.39       41.12     11.50 o
  -3   7  11        4.27        5.06      9.60 o
  -1   7  11        1.75       10.87     11.15 o
   1   7  11        5.23       -5.07     10.55 o
   3   7  11       34.87       17.82     12.98 o
   5   7  11        0.31      -11.13     11.13 o
   7   7  11      176.54      165.79     30.00 o
   9   7  11       19.96       25.11     22.80 o
 -20   8  11       45.27       21.08     26.87 o
 -18   8  11       57.24       38.37     24.25 o
 -16   8  11      432.32      405.13     31.00 o
 -14   8  11        0.04       -7.91     12.17 o
 -12   8  11       86.38      106.38     16.92 o
 -10   8  11       35.83       38.41     12.17 o
  -8   8  11      100.93       94.00     12.87 o
  -6   8  11      824.05      767.14     26.17 o
  -4   8  11      118.45      111.15     15.57 o
  -2   8  11      217.83      187.73     20.74 o
   0   8  11        5.47       24.06     14.96 o
   2   8  11       12.78       -7.35     11.64 o
   4   8  11       84.42      121.09     23.22 o
   6   8  11       81.52       85.05     26.24 o
 -17   9  11      120.35      104.04     31.79 o
 -15   9  11        6.04        1.72     16.07 o
 -13   9  11       46.78       66.11     18.07 o
 -11   9  11       58.13       71.45     16.14 o
  -9   9  11      150.08      143.93     19.22 o
  -7   9  11      652.13      639.55     27.71 o
  -5   9  11      375.61      428.88     25.08 o
  -3   9  11        5.33       -0.68     13.06 o
  -1   9  11        0.53        1.49     13.80 o
   1   9  11        7.07       10.99     13.41 o
   3   9  11       20.30       32.86     17.90 o
   5   9  11      179.30      258.96     35.16 o
 -16  10  11        9.53       -9.63     20.69 o
 -14  10  11       84.05       86.67     28.76 o
 -12  10  11      190.92      228.04     33.21 o
 -10  10  11      215.53      198.81     22.59 o
  -8  10  11       61.39       76.65     16.73 o
  -6  10  11      211.77      185.06     24.34 o
  -4  10  11        2.36        3.68     14.21 o
  -2  10  11       21.16       24.84     16.27 o
   0  10  11      100.98      100.88     22.14 o
   2  10  11        1.21        8.71     17.32 o
 -13  11  11       65.02       94.83     32.74 o
 -11  11  11      188.54      221.83     38.77 o
  -9  11  11       18.07       35.00     14.91 o
  -7  11  11        1.35        1.46     13.68 o
  -5  11  11      145.74      159.56     25.07 o
  -3  11  11        5.91        7.36     15.33 o
  -1  11  11       21.70        6.38     16.00 o
 -24   0  12      561.55      603.68     68.13 o
 -22   0  12      122.36      124.43     35.57 o
 -20   0  12       22.82       60.59     26.61 o
 -18   0  12       71.87       87.06     17.32 o
 -16   0  12     1645.45     1495.83     46.23 o
 -14   0  12       28.99       21.56     12.35 o
 -12   0  12      305.18      474.54     52.77 o
 -10   0  12      767.96      754.10     33.46 o
  -8   0  12     3844.34     4031.12     72.61 o
  -6   0  12     4350.96     4507.20     92.64 o
  -4   0  12      165.15      179.71     20.20 o
  -2   0  12     5422.42     5387.49     70.60 o
   0   0  12       29.00       39.38     14.49 o
   2   0  12       94.75       76.11     17.04 o
   4   0  12        2.35       10.47     13.29 o
   6   0  12      112.14       98.56     20.23 o
   8   0  12      525.10      670.48     46.94 o
  10   0  12       82.47      133.06     37.15 o
 -25   1  12      373.87      391.40     38.80 o
 -23   1  12       41.81       36.02     18.18 o
 -21   1  12       72.56       75.23     19.61 o
 -19   1  12      151.00      140.75     17.29 o
 -17   1  12      165.63      158.15     19.89 o
 -15   1  12     1082.74      969.46     40.23 o
 -13   1  12     1348.75     1378.18     24.09 o
 -11   1  12      616.28      625.35     17.19 o
  -9   1  12     1623.82     1638.96     33.80 o
  -7   1  12       21.28       19.34      8.35 o
  -5   1  12     1686.31     1672.18     25.65 o
  -3   1  12     2557.26     2468.58     29.86 o
  -1   1  12      133.98      192.23     13.69 o
   1   1  12      425.40      491.80     21.56 o
   3   1  12      104.14      104.37     13.57 o
   5   1  12      100.21       66.56     11.73 o
   7   1  12      394.21      405.98     24.55 o
   9   1  12      104.64      136.49     22.27 o
  11   1  12      149.50      238.27     37.85 o
 -24   2  12      190.81      266.25     30.16 o
 -22   2  12      148.71      170.73     23.96 o
 -20   2  12      211.86      245.79     22.36 o
 -18   2  12       11.33        7.09     10.37 o
 -16   2  12       47.79       73.04     11.50 o
 -14   2  12       10.08        1.45      7.41 o
 -12   2  12       19.02       23.85      8.47 o
 -10   2  12     3126.40     3171.76     44.23 o
  -8   2  12      970.32     1116.86     24.83 o
  -6   2  12     3960.62     4172.85     58.98 o
  -4   2  12       55.72       86.89     13.66 o
  -2   2  12        0.26       -2.51      6.99 o
   0   2  12        5.79       -0.19      8.01 o
   2   2  12      237.02      234.68     16.80 o
   4   2  12       14.17       38.95      9.41 o
   6   2  12      603.21      416.96     86.87 o
   8   2  12       98.17      116.24     21.78 o
  10   2  12        3.92       22.65     17.35 o
 -25   3  12      622.48      610.62     88.82 o
 -23   3  12       33.57       21.31     18.44 o
 -21   3  12       18.25       10.66     15.73 o
 -19   3  12       23.93        8.35     13.39 o
 -17   3  12       32.94       42.84     12.60 o
 -15   3  12       76.65      145.57     12.31 o
 -13   3  12      395.38      431.12     17.51 o
 -11   3  12       53.36       40.66      8.81 o
  -9   3  12      131.89      166.53     13.30 o
  -7   3  12      299.52      295.95     16.17 o
  -5   3  12     2159.50     2010.75     36.67 o
  -3   3  12       52.98       71.02      9.14 o
  -1   3  12     1109.05     1024.19     26.39 o
   1   3  12     1435.79     1284.20     30.13 o
   3   3  12       13.08        9.45      7.56 o
   5   3  12       73.49       81.05     16.43 o
   7   3  12        2.18       10.62     13.96 o
   9   3  12      283.06      349.63     31.62 o
  11   3  12      905.61     1097.17     59.36 o
 -24   4  12       80.88       61.47     39.86 o
 -22   4  12       84.54      135.03     25.09 o
 -20   4  12       28.27       16.28     13.20 o
 -18   4  12        9.24        9.38     13.58 o
 -16   4  12        4.60       34.03      8.99 o
 -14   4  12     1029.25     1057.21     27.15 o
 -12   4  12      792.48      826.78     27.66 o
 -10   4  12      262.10      282.15     16.26 o
  -8   4  12      219.62      245.34     17.04 o
  -6   4  12      476.75      495.99     18.99 o
  -4   4  12      563.72      511.06     19.27 o
  -2   4  12     2806.69     2702.53     40.90 o
   0   4  12       65.50       57.31     10.82 o
   2   4  12     1187.79     1034.46     32.07 o
   4   4  12      119.20      146.29     18.67 o
   6   4  12       20.85        4.89     12.65 o
   8   4  12      115.07      129.67     23.39 o
  10   4  12      260.07      289.39     32.17 o
 -23   5  12       26.77       34.07     27.99 o
 -21   5  12       12.66       11.81     19.48 o
 -19   5  12        3.84       -1.68     13.50 o
 -17   5  12      558.02      584.68     32.59 o
 -15   5  12       61.81       92.60     12.91 o
 -13   5  12       83.51       93.86     12.68 o
 -11   5  12        0.21       -0.09      7.61 o
  -9   5  12       85.10       96.48     12.10 o
  -7   5  12      330.64      353.06     18.98 o
  -5   5  12     1165.67     1056.40     28.26 o
  -3   5  12      547.93      522.26     22.02 o
  -1   5  12      136.56      143.87     16.40 o
   1   5  12      193.13      178.25     17.45 o
   3   5  12        5.31       18.08     11.80 o
   5   5  12      138.42      146.27     22.53 o
   7   5  12      181.21      190.52     25.53 o
   9   5  12       98.62      120.86     24.64 o
 -22   6  12       27.55       -5.59     25.74 o
 -20   6  12       25.10       26.81     20.08 o
 -18   6  12        0.03       -2.30     13.55 o
 -16   6  12       53.25       42.40     15.58 o
 -14   6  12      292.53      282.28     18.89 o
 -12   6  12      539.29      669.49     25.98 o
 -10   6  12      759.70      659.30     65.59 o
  -8   6  12     1824.91     1910.61     37.64 o
  -6   6  12      816.62      871.10     28.91 o
  -4   6  12       42.10       51.61     10.81 o
  -2   6  12     2643.30     2599.72     52.04 o
   0   6  12       89.28       42.01     13.77 o
   2   6  12        0.17        5.07     12.92 o
   4   6  12      321.90      360.59     30.22 o
   6   6  12       10.47        7.47     14.17 o
   8   6  12      470.47      480.84     38.62 o
 -21   7  12      255.41      323.88     45.68 o
 -19   7  12      511.40      537.61     50.00 o
 -17   7  12       45.82       49.18     19.66 o
 -15   7  12       44.38       30.82     14.16 o
 -13   7  12      777.84      740.47     28.50 o
 -11   7  12        7.23       20.10     10.41 o
  -9   7  12      538.45      509.41     22.31 o
  -7   7  12      179.96      228.09     18.44 o
  -5   7  12      481.61      486.83     24.66 o
  -3   7  12      644.53      541.61     27.83 o
  -1   7  12       31.12       30.17     14.36 o
   1   7  12       32.81       42.22     16.55 o
   3   7  12      198.90      225.05     24.30 o
   5   7  12       49.10       34.34     17.21 o
   7   7  12        2.00       15.24     30.95 o
 -20   8  12       98.24       83.41     32.44 o
 -18   8  12       42.25       48.99     27.17 o
 -16   8  12      322.91      368.15     35.32 o
 -14   8  12      277.61      177.61     68.96 o
 -12   8  12     1751.80     1959.20     50.24 o
 -10   8  12     1504.37     1479.57     40.34 o
  -8   8  12      391.62      344.62     34.79 o
  -6   8  12      307.28      312.35     21.94 o
  -4   8  12      136.36      184.30     18.49 o
  -2   8  12     1468.49     1550.09     48.10 o
   0   8  12       45.88       66.36     16.72 o
   2   8  12      163.48      188.36     25.43 o
   4   8  12      253.33      163.65     66.55 o
   6   8  12        2.82      -11.29     17.66 o
 -17   9  12      190.60      192.53     37.77 o
 -15   9  12      638.60      633.81     44.41 o
 -13   9  12       55.99       34.82     13.88 o
 -11   9  12       36.96       39.65     15.87 o
  -9   9  12      319.56      284.35     23.01 o
  -7   9  12      107.20      125.01     17.47 o
  -5   9  12      256.62      244.31     26.30 o
  -3   9  12      141.22      130.35     25.17 o
  -1   9  12       62.44       85.17     20.45 o
   1   9  12      148.97      148.53     25.01 o
   3   9  12       24.15      -11.37     14.23 o
 -16  10  12       60.84       65.33     30.35 o
 -14  10  12        7.33       29.16     23.96 o
 -12  10  12       31.14       38.14     17.95 o
 -10  10  12        0.03        1.51     14.39 o
  -8  10  12        5.45       13.90     15.71 o
  -6  10  12        2.39        6.93     16.54 o
  -4  10  12      158.80      174.83     29.75 o
  -2  10  12       84.21       96.89     24.85 o
   0  10  12     1071.57     1249.05     61.95 o
   2  10  12      122.02      121.55     28.23 o
 -11  11  12        0.38       -0.95     17.02 o
  -9  11  12       61.32       55.69     29.98 o
  -7  11  12        1.50       16.89     16.84 o
  -5  11  12        7.78        1.98     17.87 o
  -3  11  12       66.57       81.86     25.88 o
 -25   1  13        2.74       -2.41     24.93 o
 -23   1  13       68.99       69.04     25.01 o
 -21   1  13      160.81      169.21     26.20 o
 -19   1  13      145.46      138.29     19.25 o
 -17   1  13     1022.87      903.78     28.62 o
 -15   1  13      271.98      242.61     16.50 o
 -13   1  13     1759.94     1707.72     36.00 o
 -11   1  13       23.59       12.50      8.36 o
  -9   1  13      376.32      348.92     18.41 o
  -7   1  13     1397.45     1325.35     32.32 o
  -5   1  13       31.75       27.86      9.38 o
  -3   1  13     1003.57      964.11     23.93 o
  -1   1  13     1493.05     1469.21     31.02 o
   1   1  13     1336.93     1093.23     30.47 o
   3   1  13      224.21      303.33     19.26 o
   5   1  13      305.90      342.94     22.73 o
   7   1  13        1.67       16.27     14.44 o
   9   1  13        2.81        9.22     15.87 o
 -24   2  13       45.80       23.20     21.29 o
 -22   2  13        0.34       -8.44     16.00 o
 -20   2  13       48.76       40.95     14.60 o
 -18   2  13      424.76      420.09     20.81 o
 -16   2  13      840.25      784.77     29.59 o
 -14   2  13      902.53      842.71     23.76 o
 -12   2  13      326.39      309.62     17.89 o
 -10   2  13        9.12        6.94      6.50 o
  -8   2  13     1401.29     1403.50     25.21 o
  -6   2  13      230.47      213.05     12.61 o
  -4   2  13     5885.68     5716.29     61.46 o
  -2   2  13      101.65      105.27     11.97 o
   0   2  13      113.74       94.40     12.65 o
   2   2  13        9.95        6.61      8.92 o
   4   2  13       82.76       86.66     14.79 o
   6   2  13      106.46      168.70     23.16 o
   8   2  13       14.26       12.09     15.45 o
  10   2  13       15.30       31.02     21.50 o
 -25   3  13      120.45       77.11     34.39 o
 -23   3  13       23.08       -0.85     18.52 o
 -21   3  13        9.07       23.59     16.33 o
 -19   3  13       73.07       39.10     17.81 o
 -17   3  13      459.19      425.43     20.51 o
 -15   3  13        0.04        7.89      7.01 o
 -13   3  13     1301.40     1328.26     28.33 o
 -11   3  13        1.06       -7.08      7.84 o
  -9   3  13        1.07       -0.93      8.16 o
  -7   3  13       60.65       65.08     10.89 o
  -5   3  13       45.04       53.24     10.61 o
  -3   3  13     1281.58     1105.81     26.96 o
  -1   3  13      214.45      231.36     15.62 o
   1   3  13       68.60       61.01     13.05 o
   3   3  13      211.17      183.33     17.42 o
   5   3  13        9.66        5.04     13.88 o
   7   3  13      242.32      209.52     61.36 o
   9   3  13      132.68      152.52     29.10 o
 -24   4  13        1.25      -30.91     30.91 o
 -22   4  13       11.44        6.94     18.33 o
 -20   4  13       94.28      100.91     24.02 o
 -18   4  13       66.91       44.27     19.14 o
 -16   4  13        9.55        4.22      8.28 o
 -14   4  13      657.85      609.95     27.59 o
 -12   4  13      431.22      384.72     17.78 o
 -10   4  13      112.92      102.82     14.73 o
  -8   4  13      610.15      578.92     23.38 o
  -6   4  13     3863.70     3865.70     64.16 o
  -4   4  13     1559.93     1457.56     32.39 o
  -2   4  13      304.60      284.88     17.87 o
   0   4  13      346.18      410.96     22.57 o
   2   4  13      139.85      119.28     16.73 o
   4   4  13       78.13      105.29     20.60 o
   6   4  13        2.40        0.25     14.41 o
   8   4  13       63.22       79.16     21.39 o
 -23   5  13       21.12       10.90     42.75 o
 -21   5  13        2.32       -6.49     17.18 o
 -19   5  13        1.46      -10.52     15.50 o
 -17   5  13       15.78        2.45     14.71 o
 -15   5  13       27.89       34.36     12.01 o
 -13   5  13        0.01       -6.15      8.70 o
 -11   5  13      631.60      484.94     66.67 o
  -9   5  13     1528.20     1504.26     33.96 o
  -7   5  13      235.31      236.96     16.69 o
  -5   5  13     1079.50     1032.91     30.51 o
  -3   5  13     2685.84     2411.12     46.03 o
  -1   5  13       43.77       46.14     12.27 o
   1   5  13      153.54      156.77     18.14 o
   3   5  13       12.06        6.95     14.02 o
   5   5  13        0.56        6.41     15.10 o
   7   5  13      473.90      397.08    100.18 o
 -22   6  13      113.80       97.32     33.14 o
 -20   6  13       71.88       62.26     23.21 o
 -18   6  13       49.45       43.02     20.69 o
 -16   6  13      209.17      226.01     28.17 o
 -14   6  13      829.12      844.28     32.94 o
 -12   6  13     1523.62     1487.20     39.51 o
 -10   6  13      713.32      714.70     28.50 o
  -8   6  13     1310.67     1307.48     32.11 o
  -6   6  13      463.39      471.85     23.40 o
  -4   6  13        4.14        8.93     10.66 o
  -2   6  13      385.31      333.96     53.74 o
   0   6  13      561.14      482.35     31.90 o
   2   6  13       16.59        8.48     14.84 o
   4   6  13        7.95      -10.45     14.10 o
   6   6  13      452.54      460.54     36.29 o
 -21   7  13      156.94      125.18     35.79 o
 -19   7  13      142.91      181.50     29.41 o
 -17   7  13      315.59      209.56     99.55 o
 -15   7  13      817.61      895.07     47.02 o
 -13   7  13      528.64      493.69     30.88 o
 -11   7  13        0.01       10.28     10.63 o
  -9   7  13       11.81       28.05     12.27 o
  -7   7  13      212.71      146.20     30.18 o
  -5   7  13        1.20        2.74     10.29 o
  -3   7  13       12.89       10.20     12.60 o
  -1   7  13       56.91       41.51     15.86 o
   1   7  13       91.64       78.08     19.23 o
   3   7  13       41.21       54.88     18.32 o
   5   7  13       74.89       92.42     21.94 o
 -20   8  13      334.01      262.12     43.52 o
 -18   8  13       11.72      -12.93     20.91 o
 -16   8  13       20.81       16.76     16.70 o
 -14   8  13        0.25        5.73     14.77 o
 -12   8  13      116.90       89.93     19.12 o
 -10   8  13      675.37      669.13     27.95 o
  -8   8  13      548.94      590.30     28.72 o
  -6   8  13      119.81      108.44     18.07 o
  -4   8  13        5.44        9.00     13.51 o
  -2   8  13      497.29      572.12     36.89 o
   0   8  13       88.40       89.46     19.74 o
   2   8  13        0.14        5.32     14.49 o
   4   8  13      147.41      155.75     29.35 o
 -17   9  13      577.74      678.43     57.64 o
 -15   9  13      161.77      148.56     27.25 o
 -13   9  13        0.43       -8.91     15.75 o
 -11   9  13       38.33       44.52     17.00 o
  -9   9  13      161.64      161.93     21.93 o
  -7   9  13       86.99       90.69     19.85 o
  -5   9  13       15.06       25.45     24.67 o
  -3   9  13        6.48       13.55     17.02 o
  -1   9  13      257.88      346.47     36.62 o
   1   9  13      115.94      118.71     26.57 o
 -14  10  13        2.77        4.27     18.23 o
 -12  10  13       19.13        9.30     18.07 o
 -10  10  13      132.09      115.90     23.79 o
  -8  10  13        0.39        7.94     14.79 o
  -6  10  13      400.24      458.35     40.61 o
  -4  10  13       17.73       23.43     19.34 o
  -2  10  13       13.93       29.62     20.42 o
   0  10  13      119.62      119.30     29.16 o
  -9  11  13      171.11      204.37     31.76 o
  -7  11  13       97.45       91.43     22.89 o
 -24   0  14      253.61      194.77     61.86 o
 -22   0  14      271.86      229.46     60.60 o
 -20   0  14      206.13      139.42     39.29 o
 -18   0  14      873.87      816.32     56.34 o
 -16   0  14       13.81      -11.15     16.31 o
 -14   0  14     2123.18     1935.69     66.02 o
 -12   0  14      145.89      130.95     23.71 o
 -10   0  14      267.60      292.40     25.62 o
  -8   0  14     2002.70     1922.09     56.70 o
  -6   0  14        2.61      -11.08     13.56 o
  -4   0  14     8628.32     8237.58    123.28 o
  -2   0  14     1655.70     1587.56     47.36 o
   0   0  14      498.20      472.28     30.95 o
   2   0  14      158.09      193.10     23.99 o
   4   0  14      139.22      229.12     30.92 o
   6   0  14      100.47      130.93     28.22 o
   8   0  14       35.60       26.73     29.05 o
 -25   1  14        0.31       12.34     26.98 o
 -23   1  14       34.70       30.94     26.55 o
 -21   1  14        1.72        0.11     20.05 o
 -19   1  14      181.77      170.53     19.90 o
 -17   1  14       16.30        9.49     11.45 o
 -15   1  14       65.63       51.20     12.62 o
 -13   1  14       16.28       18.63     10.54 o
 -11   1  14        0.37       -1.62      8.97 o
  -9   1  14     2288.29     2140.08     44.70 o
  -7   1  14      445.30      447.54     25.07 o
  -5   1  14       12.92        1.02     10.34 o
  -3   1  14       39.32       52.92     10.21 o
  -1   1  14        4.51       14.46      8.80 o
   1   1  14      293.37      344.31     20.08 o
   3   1  14      243.16      287.38     20.98 o
   5   1  14       10.13       19.74     13.15 o
   7   1  14        0.46       11.46     14.45 o
   9   1  14       22.97       26.57     19.96 o
 -24   2  14      222.59      228.46     45.16 o
 -22   2  14      274.62      252.07     44.09 o
 -20   2  14      126.15      141.57     24.36 o
 -18   2  14       94.31       60.12     27.73 o
 -16   2  14      318.33      315.62     19.78 o
 -14   2  14     3297.10     3175.02     50.44 o
 -12   2  14       14.57        0.70      8.78 o
 -10   2  14     1871.93     1794.16     41.78 o
  -8   2  14     1194.62     1072.37     35.91 o
  -6   2  14        0.79        3.57      8.02 o
  -4   2  14     2677.55     2465.13     53.94 o
  -2   2  14      703.55      729.83     24.81 o
   0   2  14      111.96      134.67     15.13 o
   2   2  14      129.31      122.53     15.78 o
   4   2  14        4.58        6.44     13.68 o
   6   2  14        0.44       12.89     13.89 o
   8   2  14       25.04       41.88     16.02 o
 -23   3  14       32.95       31.41     22.38 o
 -21   3  14       67.62       70.11     19.94 o
 -19   3  14        9.77      -12.85     12.85 o
 -17   3  14      771.74      772.94     31.01 o
 -15   3  14        7.84       10.55      9.31 o
 -13   3  14      698.51      646.65     25.43 o
 -11   3  14      153.49      154.34     15.00 o
  -9   3  14        5.51        4.80      8.68 o
  -7   3  14      698.08      655.84     25.43 o
  -5   3  14     1017.55      958.95     30.40 o
  -3   3  14     3761.68     3443.48     48.47 o
  -1   3  14      164.10      160.96     16.18 o
   1   3  14      189.42      190.89     17.86 o
   3   3  14      346.41      380.38     26.47 o
   5   3  14      115.08      118.63     25.07 o
   7   3  14      259.44      301.91     30.81 o
 -24   4  14       43.72       73.33     28.09 o
 -22   4  14        9.87       -9.92     14.81 o
 -20   4  14        0.21        2.27     14.90 o
 -18   4  14      209.15      206.75     24.48 o
 -16   4  14        7.86       -4.54      8.42 o
 -14   4  14        0.64       -7.06      8.43 o
 -12   4  14       87.24       54.98     11.69 o
 -10   4  14      105.76      109.79     15.39 o
  -8   4  14     2234.25     2223.86     45.84 o
  -6   4  14      283.83      302.26     19.87 o
  -4   4  14      140.53      137.98     15.85 o
  -2   4  14       77.21       73.66     13.35 o
   0   4  14       59.78       43.29     12.63 o
   2   4  14       55.57       37.81     14.41 o
   4   4  14      100.09      103.61     20.56 o
   6   4  14        1.63        2.01     16.66 o
 -23   5  14       63.75       36.81     27.68 o
 -21   5  14      221.54      199.64     30.05 o
 -19   5  14      357.00      346.97     33.70 o
 -17   5  14      716.48      591.11     35.79 o
 -15   5  14       74.73       61.43     13.69 o
 -13   5  14       99.34      128.27     16.70 o
 -11   5  14      126.53      132.02     16.65 o
  -9   5  14        0.17        4.63     10.60 o
  -7   5  14      237.44      221.17     20.14 o
  -5   5  14        1.78        1.47     11.43 o
  -3   5  14      167.33      165.79     20.27 o
  -1   5  14       65.27       53.18     14.20 o
   1   5  14      214.91      223.19     24.29 o
   3   5  14       18.04       26.52     17.52 o
   5   5  14      464.16      544.62     42.32 o
   7   5  14       41.88       68.21     27.51 o
 -22   6  14       20.39      -22.49     22.49 o
 -20   6  14       41.10       17.27     17.64 o
 -18   6  14        7.25       14.57     17.71 o
 -16   6  14       66.99       68.79     21.25 o
 -14   6  14      191.24      170.59     18.21 o
 -12   6  14      738.51      724.07     29.81 o
 -10   6  14      162.24      181.38     19.68 o
  -8   6  14     1047.61     1070.70     38.17 o
  -6   6  14       83.12       83.93     17.45 o
  -4   6  14      139.50      125.26     19.49 o
  -2   6  14      130.87      175.44     25.38 o
   0   6  14      360.57      269.79     65.52 o
   2   6  14      201.00      223.50     29.83 o
   4   6  14       29.29       32.68     19.31 o
   6   6  14       78.20      127.08     28.53 o
 -21   7  14       41.22        3.49     26.65 o
 -19   7  14      245.05      168.51     36.96 o
 -17   7  14      395.75      367.72     35.72 o
 -15   7  14        0.06      -13.90     13.90 o
 -13   7  14        4.95       -3.54     10.29 o
 -11   7  14      304.67      248.01     21.16 o
  -9   7  14       21.21       21.33     13.59 o
  -7   7  14      171.67      143.44     21.30 o
  -5   7  14       49.64       74.21     17.69 o
  -3   7  14       43.65       30.96     15.16 o
  -1   7  14      434.94      498.85     38.94 o
   1   7  14       26.88       32.26     18.44 o
   3   7  14       78.98       96.16     22.79 o
 -18   8  14       58.28       42.12     22.50 o
 -16   8  14        0.12       -0.73     16.51 o
 -14   8  14       45.36       25.37     18.18 o
 -12   8  14        1.11       -3.51     10.81 o
 -10   8  14      279.14      297.77     24.91 o
  -8   8  14       69.72       57.67     14.59 o
  -6   8  14      194.94      176.43     23.55 o
  -4   8  14       39.17       29.66     18.43 o
  -2   8  14      332.07      360.59     32.15 o
   0   8  14       35.14       56.88     19.70 o
   2   8  14       65.67       83.71     22.21 o
 -17   9  14      141.58      128.50     34.34 o
 -15   9  14      272.17      259.51     33.17 o
 -13   9  14       16.47       19.38     18.69 o
 -11   9  14       41.26       41.03     15.84 o
  -9   9  14        7.09       -2.74     13.77 o
  -7   9  14        9.15       25.45     18.07 o
  -5   9  14      420.80      467.16     52.00 o
  -3   9  14        5.37       -6.97     15.94 o
  -1   9  14      112.71      156.62     29.50 o
   1   9  14       38.49       24.70     20.86 o
 -14  10  14        9.41        8.92     18.99 o
 -12  10  14       66.42       60.84     20.80 o
 -10  10  14       23.11       23.62     15.71 o
  -8  10  14       96.85       77.71     20.88 o
  -6  10  14      284.35      405.69     40.21 o
  -4  10  14      432.18      504.99     44.82 o
 -25   1  15       20.89       39.28     29.97 o
 -23   1  15      171.61      163.99     39.73 o
 -21   1  15      202.99      207.72     37.63 o
 -19   1  15      120.33       65.82     18.39 o
 -17   1  15      246.29      295.10     27.30 o
 -15   1  15      227.59      189.54     46.29 o
 -13   1  15        0.03        1.57     10.17 o
 -11   1  15      655.09      672.63     30.17 o
  -9   1  15      110.93       97.82     16.23 o
  -7   1  15      362.22      376.29     24.73 o
  -5   1  15     1641.21     1463.72     43.38 o
  -3   1  15       42.56       27.03     10.38 o
  -1   1  15       25.70       96.54     15.54 o
   1   1  15      224.92      248.37     24.05 o
   3   1  15      224.01      234.21     24.26 o
   5   1  15       10.44       21.05     17.11 o
   7   1  15      414.57      448.39     45.50 o
 -24   2  15       37.21       26.95     31.56 o
 -22   2  15       61.69       52.98     29.99 o
 -20   2  15        9.39       21.19     19.53 o
 -18   2  15       18.36       25.70     14.84 o
 -16   2  15      277.06      302.14     24.97 o
 -14   2  15        5.67        8.72     10.71 o
 -12   2  15       18.08       13.17     12.09 o
 -10   2  15       56.23       52.04     13.87 o
  -8   2  15     1917.57     1771.79     46.79 o
  -6   2  15      738.04      714.38     25.73 o
  -4   2  15      592.29      549.23     24.88 o
  -2   2  15      174.05      189.67     18.62 o
   0   2  15        3.41        7.42     11.14 o
   2   2  15        0.02       11.26     12.92 o
   4   2  15       22.64       24.95     17.03 o
   6   2  15      877.66     1115.93     55.21 o
 -23   3  15       38.75       39.39     29.47 o
 -21   3  15        0.34       10.76     18.76 o
 -19   3  15        0.00       11.19     19.45 o
 -17   3  15      105.17       94.27     17.49 o
 -15   3  15       75.73      122.94     18.99 o
 -13   3  15      122.21      104.69     18.10 o
 -11   3  15     1368.59     1347.91     45.15 o
  -9   3  15      490.85      518.47     23.73 o
  -7   3  15        1.71       -0.26      9.04 o
  -5   3  15       10.62        3.90      9.23 o
  -3   3  15      527.26      482.24     26.46 o
  -1   3  15      306.77      223.02     20.89 o
   1   3  15      178.83      193.97     22.86 o
   3   3  15      482.13      607.96     41.33 o
   5   3  15        0.00        9.95     16.37 o
   7   3  15      255.16      334.67     36.34 o
 -24   4  15       63.06       60.90     28.34 o
 -22   4  15      223.62      115.75     54.91 o
 -20   4  15       35.34        8.11     16.54 o
 -18   4  15        0.62       -2.35     17.73 o
 -16   4  15       78.25       69.02     15.10 o
 -14   4  15       14.45       20.96     12.01 o
 -12   4  15     1539.14     1562.59     42.15 o
 -10   4  15     1175.78     1183.75     40.35 o
  -8   4  15      708.54      687.08     26.25 o
  -6   4  15      930.21      836.46     32.38 o
  -4   4  15      391.19      397.42     25.25 o
  -2   4  15      110.45      137.92     18.27 o
   0   4  15      371.88      421.35     30.68 o
   2   4  15      478.61      590.84     41.29 o
   4   4  15      114.53      120.65     24.24 o
   6   4  15     1414.09     1570.46     66.53 o
 -23   5  15      233.20      315.03     37.41 o
 -21   5  15      101.49       81.45     24.58 o
 -19   5  15        3.78        4.35     16.30 o
 -17   5  15      340.54      340.85     29.94 o
 -15   5  15      870.10      850.88     34.40 o
 -13   5  15        9.09        8.56     11.33 o
 -11   5  15       33.14       27.22     12.53 o
  -9   5  15       12.36        1.51     10.43 o
  -7   5  15      860.61      819.98     36.68 o
  -5   5  15       88.54      104.67     18.32 o
  -3   5  15        1.07       -1.25     12.23 o
  -1   5  15        7.23       -6.87     13.26 o
   1   5  15       66.83       85.53     21.52 o
   3   5  15     1368.91     1527.42     75.20 o
   5   5  15       35.53       67.78     23.15 o
 -22   6  15       21.83       -4.06     17.43 o
 -20   6  15      170.08      192.41     36.02 o
 -18   6  15      328.09      336.17     35.53 o
 -16   6  15       21.73       22.97     15.92 o
 -14   6  15      438.09      407.48     26.63 o
 -12   6  15      406.05      375.36     28.37 o
 -10   6  15      129.94      111.74     19.19 o
  -8   6  15      166.41      156.81     21.40 o
  -6   6  15      264.81      298.62     26.36 o
  -4   6  15      290.48      275.51     25.73 o
  -2   6  15      165.19      189.26     26.97 o
   0   6  15       52.30       45.32     19.32 o
   2   6  15        9.52       25.04     17.32 o
   4   6  15       97.86       70.75     23.67 o
 -19   7  15        7.53       23.53     23.52 o
 -17   7  15      369.23      334.00     31.06 o
 -15   7  15      444.57      466.08     34.47 o
 -13   7  15        0.44        4.42     13.59 o
 -11   7  15       40.48       28.82     15.10 o
  -9   7  15       25.96       15.17     14.32 o
  -7   7  15      337.12      334.70     28.46 o
  -5   7  15       48.04       44.59     15.90 o
  -3   7  15       38.72       12.45     16.24 o
  -1   7  15       11.38       12.61     14.82 o
   1   7  15        4.45       27.12     18.50 o
   3   7  15       42.28       54.38     20.09 o
 -18   8  15        6.60        6.46     23.13 o
 -16   8  15      115.25      123.66     24.18 o
 -14   8  15      353.70      352.77     31.69 o
 -12   8  15      159.22      182.31     21.89 o
 -10   8  15        4.00       11.02     14.33 o
  -8   8  15       53.96       51.04     15.51 o
  -6   8  15      107.90       96.17     22.75 o
  -4   8  15      136.79      113.03     34.21 o
  -2   8  15        5.30       15.05     17.32 o
   0   8  15       67.58       60.38     20.69 o
 -15   9  15       96.49      125.25     26.93 o
 -13   9  15        4.63       -0.91     15.94 o
 -11   9  15       19.12       17.96     15.83 o
  -9   9  15        5.73        9.56     14.20 o
  -7   9  15      158.24      148.01     24.82 o
  -5   9  15      223.26      237.04     29.19 o
  -3   9  15        1.26       -3.75     15.37 o
  -1   9  15       26.78       18.83     20.03 o
 -12  10  15       34.74       58.07     23.39 o
 -10  10  15        8.09       10.64     19.50 o
  -8  10  15       63.44       51.08     20.38 o
  -6  10  15       71.90      119.83     28.18 o
 -24   0  16       21.27        0.00     36.78 o
 -22   0  16       57.82       68.13     42.63 o
 -20   0  16      147.47       88.92     29.22 o
 -18   0  16      363.70      323.44     42.12 o
 -16   0  16     1456.79     1455.15     76.00 o
 -14   0  16      381.39      394.68     51.95 o
 -12   0  16       16.55       11.94     16.88 o
 -10   0  16       74.66       48.46     20.08 o
  -8   0  16     1415.15     1314.78     59.69 o
  -6   0  16       42.83       41.62     19.30 o
  -4   0  16      836.57      745.54     60.14 o
  -2   0  16      516.89      313.37     52.66 o
   0   0  16       23.40       29.23     23.70 o
   2   0  16      143.38      161.21     37.65 o
   4   0  16      125.46       88.49     32.51 o
   6   0  16      512.69      647.43     95.71 o
 -25   1  16       33.16       23.40     29.38 o
 -23   1  16       59.08       45.82     30.14 o
 -21   1  16      114.54       78.95     24.60 o
 -19   1  16        2.70       -1.89     13.64 o
 -17   1  16       92.36       82.19     19.76 o
 -15   1  16        1.87        8.02     12.40 o
 -13   1  16      109.36      112.97     17.33 o
 -11   1  16      442.01      440.46     26.92 o
  -9   1  16     1077.19     1081.33     38.85 o
  -7   1  16       87.57       77.51     16.44 o
  -5   1  16      105.57      124.74     20.40 o
  -3   1  16      473.32      444.26     34.74 o
  -1   1  16      136.16      167.62     25.92 o
   1   1  16      574.27      608.59     40.30 o
   3   1  16       70.50       81.86     22.13 o
   5   1  16        9.12       -3.62     18.74 o
 -24   2  16      136.07      127.88     39.59 o
 -22   2  16      143.17      110.86     29.97 o
 -20   2  16      368.61      227.57     54.93 o
 -18   2  16     1076.03     1035.41     47.07 o
 -16   2  16      294.84      268.51     26.68 o
 -14   2  16      889.72      880.46     38.72 o
 -12   2  16      247.82      239.32     23.99 o
 -10   2  16       15.84       10.66     11.50 o
  -8   2  16      299.74      259.32     22.92 o
  -6   2  16       47.30       44.73     15.55 o
  -4   2  16      438.36      508.21     36.28 o
  -2   2  16       17.56        8.02     15.11 o
   0   2  16       23.96       29.95     17.49 o
   2   2  16        3.20       -2.00     14.27 o
   4   2  16       37.12       45.60     24.22 o
   6   2  16      215.70      233.84     39.17 o
 -23   3  16       71.76       78.70     36.79 o
 -21   3  16       81.30       66.85     31.63 o
 -19   3  16       61.59       55.85     23.08 o
 -17   3  16      132.71      143.63     20.79 o
 -15   3  16      110.30      131.28     20.20 o
 -13   3  16      605.12      578.90     33.45 o
 -11   3  16        6.78       19.62     13.03 o
  -9   3  16     6473.24     6198.25     97.61 o
  -7   3  16      700.20      652.31     39.79 o
  -5   3  16      101.75      106.79     22.38 o
  -3   3  16      216.54      290.17     30.37 o
  -1   3  16      624.05      706.19     42.25 o
   1   3  16     1355.03     1446.66     70.44 o
   3   3  16      497.01      482.15     46.90 o
   5   3  16       14.24       18.59     22.88 o
 -22   4  16      175.32      207.81     35.85 o
 -20   4  16       45.96       57.17     24.75 o
 -18   4  16       29.96       33.77     21.50 o
 -16   4  16       45.41       61.94     17.01 o
 -14   4  16      888.97      916.91     46.92 o
 -12   4  16      356.59      351.42     28.44 o
 -10   4  16      191.47      165.25     24.88 o
  -8   4  16      906.08      783.32     42.77 o
  -6   4  16       56.77       39.89     17.70 o
  -4   4  16      137.35       98.08     21.84 o
  -2   4  16       45.45       48.81     18.39 o
   0   4  16       16.28       42.84     22.54 o
   2   4  16      114.85      187.76     35.61 o
   4   4  16       60.77       40.24     25.70 o
 -21   5  16        8.75       -4.40     17.51 o
 -19   5  16      740.50      830.10     58.36 o
 -17   5  16      249.10      277.78     45.26 o
 -15   5  16       65.27       69.52     17.75 o
 -13   5  16      553.04      566.79     38.44 o
 -11   5  16      257.48      271.20     29.93 o
  -9   5  16      667.03      619.59     40.46 o
  -7   5  16      138.37      106.11     22.80 o
  -5   5  16       44.53       20.79     16.95 o
  -3   5  16      115.91      110.03     23.76 o
  -1   5  16        0.03       18.66     20.06 o
   1   5  16       36.52       43.52     23.15 o
   3   5  16       16.98       11.00     22.18 o
 -20   6  16      459.70      455.79     42.47 o
 -18   6  16      209.10      164.31     29.55 o
 -16   6  16        3.58       -0.58     19.44 o
 -14   6  16      380.03      452.69     36.62 o
 -12   6  16      736.25      813.73     45.62 o
 -10   6  16      398.69      410.53     35.16 o
  -8   6  16      211.73      182.05     27.53 o
  -6   6  16      170.55      237.47     25.03 o
  -4   6  16      186.93      197.31     27.76 o
  -2   6  16      202.92      267.82     31.38 o
   0   6  16      621.01      729.40     57.62 o
   2   6  16       33.24       45.80     25.83 o
 -19   7  16      249.75      294.96     37.05 o
 -17   7  16       78.40       65.00     23.55 o
 -15   7  16      417.95      452.67     46.62 o
 -13   7  16      570.42      609.91     42.14 o
 -11   7  16      633.31      602.68     41.93 o
  -9   7  16      120.79      101.71     24.20 o
  -7   7  16       30.33       26.88     15.98 o
  -5   7  16        6.86       15.24     15.72 o
  -3   7  16      177.22      183.44     28.62 o
  -1   7  16      175.38      223.06     31.41 o
   1   7  16        9.85       11.94     23.45 o
 -18   8  16       86.39       50.31     23.70 o
 -16   8  16        1.51       14.27     19.01 o
 -14   8  16      135.39      107.83     30.17 o
 -12   8  16       32.94       35.67     19.57 o
 -10   8  16      197.46      207.13     30.28 o
  -8   8  16      141.96      164.26     21.66 o
  -6   8  16      182.23      220.42     31.07 o
  -4   8  16        4.56      -11.27     15.37 o
  -2   8  16      403.49      301.03    111.64 o
 -15   9  16        7.07        9.27     19.06 o
 -13   9  16      209.04      271.86     41.29 o
 -11   9  16       32.24       36.35     18.36 o
  -9   9  16        9.26        6.20     17.81 o
  -7   9  16       54.00       63.11     19.56 o
  -5   9  16      163.64      126.73     34.06 o
 -23   1  17      110.40       75.44     34.73 o
 -21   1  17      315.02      335.89     39.07 o
 -19   1  17       25.09       29.62     15.91 o
 -17   1  17      361.21      166.91     90.81 o
 -15   1  17      190.47      198.06     26.33 o
 -13   1  17      972.15     1031.80     48.74 o
 -11   1  17        1.38      126.18     23.44 o
  -9   1  17     4579.13     4324.27     93.74 o
  -7   1  17      383.38      426.88     34.90 o
  -5   1  17      255.88      246.40     29.53 o
  -3   1  17      239.87      259.46     30.45 o
  -1   1  17        0.81       11.57     16.67 o
   1   1  17      187.85      211.09     30.16 o
   3   1  17        3.84       10.67     20.58 o
 -24   2  17       20.95       16.99     28.49 o
 -22   2  17        1.13        4.64     19.24 o
 -20   2  17      169.56      168.10     31.47 o
 -18   2  17        9.64       31.16     17.12 o
 -16   2  17      449.55      270.44    103.16 o
 -14   2  17     2046.72     2051.46     65.77 o
 -12   2  17      404.18      411.92     34.02 o
 -10   2  17      980.04      967.34     47.89 o
  -8   2  17       30.23       66.20     20.09 o
  -6   2  17      174.36      226.99     28.41 o
  -4   2  17       31.75       59.89     19.53 o
  -2   2  17      582.68      676.67     42.68 o
   0   2  17       57.56       99.72     22.98 o
   2   2  17       22.68       31.68     21.71 o
   4   2  17      422.72      479.49     49.12 o
 -23   3  17        9.26        3.39     21.62 o
 -21   3  17      532.10      554.06     48.64 o
 -19   3  17       64.46       61.53     24.74 o
 -17   3  17      662.73      678.72     41.86 o
 -15   3  17      232.68      197.47     26.57 o
 -13   3  17      303.63      313.05     31.43 o
 -11   3  17       82.80       80.15     21.12 o
  -9   3  17      135.23      140.64     24.84 o
  -7   3  17        3.67       -1.85     14.77 o
  -5   3  17       13.71       36.37     18.15 o
  -3   3  17      232.10      264.25     30.62 o
  -1   3  17       30.50       59.39     20.69 o
   1   3  17       92.01      143.45     32.46 o
   3   3  17      165.31      257.25     39.83 o
 -22   4  17      381.56      371.48     47.46 o
 -20   4  17      176.68      166.57     32.90 o
 -18   4  17      117.85       99.33     28.70 o
 -16   4  17      685.49      701.12     43.20 o
 -14   4  17      319.02      354.36     32.72 o
 -12   4  17      444.44      426.73     35.58 o
 -10   4  17      373.96      390.05     34.19 o
  -8   4  17       11.67       19.16     17.42 o
  -6   4  17        9.68       30.02     17.87 o
  -4   4  17      111.81      146.52     25.71 o
  -2   4  17       11.29       33.30     21.44 o
   0   4  17       54.49       65.33     26.26 o
   2   4  17        0.12       17.44     23.63 o
 -21   5  17       37.03       42.46     27.14 o
 -19   5  17       82.64       66.48     27.24 o
 -17   5  17       79.45       96.51     29.48 o
 -15   5  17       32.49       34.13     19.15 o
 -13   5  17      796.01      801.98     45.75 o
 -11   5  17       11.54        8.14     16.55 o
  -9   5  17       47.92       43.73     18.87 o
  -7   5  17      141.18      152.92     26.51 o
  -5   5  17        3.12       -2.87     15.61 o
  -3   5  17      185.25      254.97     37.97 o
  -1   5  17       45.52       69.62     26.10 o
   1   5  17        6.32        5.51     21.15 o
 -20   6  17       28.02       34.13     27.20 o
 -18   6  17        0.03       -0.19     21.68 o
 -16   6  17       10.61       10.10     22.01 o
 -14   6  17      596.79      500.15     67.85 o
 -12   6  17       38.68       50.09     19.83 o
 -10   6  17      205.80      203.74     28.96 o
  -8   6  17      372.58      361.65     34.81 o
  -6   6  17      126.76      152.37     26.87 o
  -4   6  17      132.70      147.56     33.23 o
  -2   6  17      297.40      339.43     43.83 o
   0   6  17       35.46       32.56     24.29 o
 -19   7  17      145.56      211.64     47.52 o
 -17   7  17       54.25       48.27     26.27 o
 -15   7  17      259.69      351.95     43.44 o
 -13   7  17       65.42       63.00     21.38 o
 -11   7  17       13.17        1.56     16.12 o
  -9   7  17        0.01        7.20     16.42 o
  -7   7  17        1.81        9.39     19.44 o
  -5   7  17      281.25      342.90     43.21 o
  -3   7  17       37.83       89.95     30.25 o
  -1   7  17      215.43      284.44     43.99 o
 -16   8  17       16.58       49.21     26.44 o
 -14   8  17      211.21      274.86     41.43 o
 -12   8  17      113.25      119.12     30.28 o
 -10   8  17       63.82       64.77     23.80 o
  -8   8  17       45.42       62.97     26.69 o
  -6   8  17        5.79        1.36     20.02 o
  -4   8  17      118.52      144.93     33.99 o
 -11   9  17       73.72       90.07     22.90 o
  -9   9  17        8.97       17.88     19.16 o
 -24   0  18        1.12       -7.94     36.78 o
 -22   0  18       89.45       15.88     37.62 o
 -20   0  18      501.57      594.20     91.33 o
 -18   0  18      164.61      174.05     38.45 o
 -16   0  18      432.96      380.20     48.05 o
 -14   0  18      786.14      734.67     62.12 o
 -12   0  18     4275.51     4228.19    135.36 o
 -10   0  18      141.45      141.53     35.76 o
  -8   0  18      173.84      180.14     39.74 o
  -6   0  18       12.35      -14.29     20.48 o
  -4   0  18      348.68      438.69     52.75 o
  -2   0  18      191.66      212.50     42.24 o
   0   0  18       23.25       36.22     27.60 o
   2   0  18      107.84      149.55     39.59 o
 -23   1  18        0.95      -14.06     23.76 o
 -21   1  18        0.89       -0.82     20.14 o
 -19   1  18        3.95        1.56     15.61 o
 -17   1  18       45.52       39.40     17.66 o
 -15   1  18      558.48      554.53     39.52 o
 -13   1  18      174.35      158.76     25.95 o
 -11   1  18        0.17        3.31     15.80 o
  -9   1  18        7.33      -10.82     14.40 o
  -7   1  18      318.18      353.69     34.51 o
  -5   1  18      477.30      494.45     39.01 o
  -3   1  18        6.37       20.26     18.30 o
  -1   1  18      322.95      318.39     34.14 o
   1   1  18       37.40       82.26     23.96 o
   3   1  18        5.30        3.47     23.03 o
 -24   2  18      111.21       96.17     39.16 o
 -22   2  18       25.16        6.11     21.58 o
 -20   2  18       52.78       69.24     26.14 o
 -18   2  18      277.52      332.11     33.17 o
 -16   2  18       92.78       89.19     21.90 o
 -14   2  18       64.90       44.21     19.89 o
 -12   2  18      385.09      364.08     34.36 o
 -10   2  18        8.53       11.72     16.25 o
  -8   2  18      127.77      143.23     25.75 o
  -6   2  18      277.15      384.75     35.29 o
  -4   2  18      326.70      362.03     35.15 o
  -2   2  18      110.68      121.50     25.61 o
   0   2  18        9.94        0.32     17.01 o
   2   2  18      112.06      170.00     35.92 o
 -23   3  18       63.64       63.51     26.27 o
 -21   3  18        2.19        8.16     21.79 o
 -19   3  18       14.43       -1.05     19.71 o
 -17   3  18       13.49       17.27     17.26 o
 -15   3  18      526.91      542.13     39.94 o
 -13   3  18      803.61      779.20     62.68 o
 -11   3  18      404.95      364.63     34.41 o
  -9   3  18       29.00       20.39     17.62 o
  -7   3  18       94.40       99.14     24.11 o
  -5   3  18        2.94       -2.71     15.82 o
  -3   3  18       11.97       13.40     17.09 o
  -1   3  18       17.58       13.15     20.81 o
   1   3  18      471.31      625.41     55.04 o
 -22   4  18       40.34       34.17     27.12 o
 -20   4  18       99.38      108.35     30.69 o
 -18   4  18       11.28        4.86     21.66 o
 -16   4  18        4.14       20.33     17.66 o
 -14   4  18        1.99       -9.69     14.66 o
 -12   4  18      170.14      154.07     26.89 o
 -10   4  18        0.27        1.83     15.38 o
  -8   4  18        9.47       16.78     17.59 o
  -6   4  18        5.04        8.19     17.34 o
  -4   4  18       65.84       46.97     20.39 o
  -2   4  18      336.37      442.45     48.33 o
   0   4  18       53.91       65.91     28.19 o
 -21   5  18      100.72       99.54     32.89 o
 -19   5  18       56.29       87.65     30.03 o
 -17   5  18      359.35      395.30     45.51 o
 -15   5  18        7.05        7.72     13.46 o
 -13   5  18       79.84       59.15     20.37 o
 -11   5  18        5.11       -5.95     15.87 o
  -9   5  18        7.02        7.82     16.72 o
  -7   5  18        0.00       13.26     16.84 o
  -5   5  18        7.64       20.46     18.20 o
  -3   5  18      549.97      640.64     54.70 o
  -1   5  18       89.19      161.39     35.73 o
 -20   6  18       40.46       18.12     26.24 o
 -18   6  18       26.77       12.95     22.87 o
 -16   6  18       24.50       33.50     19.66 o
 -14   6  18       43.90       52.15     21.62 o
 -12   6  18       15.32        3.45     16.42 o
 -10   6  18       31.30       12.49     17.47 o
  -8   6  18      129.60      140.68     26.93 o
  -6   6  18      122.27      155.30     33.69 o
  -4   6  18      199.34      240.62     42.63 o
  -2   6  18      172.38      207.02     38.76 o
 -17   7  18      434.86      491.43     51.09 o
 -15   7  18      159.04      155.53     28.52 o
 -13   7  18        2.29      -14.87     16.74 o
 -11   7  18       45.76       52.55     20.30 o
  -9   7  18       41.50       43.75     21.18 o
  -7   7  18       14.30       23.39     20.96 o
  -5   7  18       66.78       40.29     25.82 o
  -3   7  18       77.86       66.44     28.76 o
 -14   8  18       49.42       52.78     22.19 o
 -12   8  18       23.89        3.42     19.42 o
 -10   8  18      241.98      257.48     34.51 o
  -8   8  18      144.78      185.76     38.44 o
 -23   1  19       20.58       17.62     29.06 o
 -21   1  19      254.84      133.13     79.65 o
 -19   1  19       46.66       54.66     19.76 o
 -17   1  19      511.91      557.41     44.66 o
 -15   1  19      113.98      103.17     24.09 o
 -13   1  19        4.32        7.07     16.97 o
 -11   1  19       23.53        2.59     17.01 o
  -9   1  19       65.26       81.07     23.42 o
  -7   1  19       31.67       37.20     18.98 o
  -5   1  19      134.67      106.53     25.75 o
  -3   1  19       46.03       31.47     19.76 o
  -1   1  19        2.11       20.22     19.36 o
   1   1  19       14.85       31.10     30.09 o
 -22   2  19        2.00       -3.74     18.35 o
 -20   2  19        0.28       13.63     21.79 o
 -18   2  19      130.48       89.65     24.49 o
 -16   2  19      133.74      113.72     25.34 o
 -14   2  19     1559.65     1513.87     61.68 o
 -12   2  19       24.05       12.70     17.60 o
 -10   2  19      331.17      284.26     32.73 o
  -8   2  19        1.53       -2.86     15.55 o
  -6   2  19       31.30       39.82     19.04 o
  -4   2  19      367.29      533.66     41.94 o
  -2   2  19       45.12       35.13     20.38 o
   0   2  19       34.82       41.26     25.80 o
 -21   3  19      561.24      691.79     55.95 o
 -19   3  19      118.92       89.70     29.11 o
 -17   3  19      158.91       50.37     32.46 o
 -15   3  19       39.66       52.29     20.73 o
 -13   3  19       77.69       78.86     22.95 o
 -11   3  19        0.01       -6.46     15.97 o
  -9   3  19        0.07       11.99     16.78 o
  -7   3  19        2.01        8.25     16.87 o
  -5   3  19       66.79       84.53     23.95 o
  -3   3  19      297.52      392.08     38.97 o
  -1   3  19      187.33      181.41     36.90 o
 -20   4  19       20.82       14.83     24.29 o
 -18   4  19       41.60       62.06     21.26 o
 -16   4  19      230.51      201.90     30.11 o
 -14   4  19      908.31      871.98     49.60 o
 -12   4  19      176.82      171.47     28.66 o
 -10   4  19       28.83       20.01     18.56 o
  -8   4  19       96.51      140.91     27.31 o
  -6   4  19      111.11      115.22     26.72 o
  -4   4  19      784.75      880.46     70.59 o
  -2   4  19        0.54       18.43     22.72 o
 -19   5  19        0.03        5.30     23.28 o
 -17   5  19       79.32       82.00     24.97 o
 -15   5  19       18.49       26.79     19.07 o
 -13   5  19       71.39      109.03     25.16 o
 -11   5  19      157.25      157.83     29.08 o
  -9   5  19      326.30      326.98     35.69 o
  -7   5  19      513.26      638.12     45.68 o
  -5   5  19      368.10      395.72     47.31 o
  -3   5  19       42.53       35.45     24.33 o
 -18   6  19     1099.14     1204.73     72.55 o
 -16   6  19        6.01        3.90     17.84 o
 -14   6  19        2.47        7.41     17.31 o
 -12   6  19        9.47        2.52     17.81 o
 -10   6  19        1.01       20.06     19.38 o
  -8   6  19       28.03       33.66     20.32 o
  -6   6  19       66.70       65.56     28.61 o
  -4   6  19       88.12       80.59     29.08 o
 -15   7  19      213.81      102.96     38.97 o
 -13   7  19        5.57        4.53     18.60 o
 -11   7  19       22.78        2.26     18.38 o
  -9   7  19      121.29      105.11     30.77 o
  -7   7  19       11.86       31.61     25.17 o
 -22   0  20      610.38      530.82     91.95 o
 -20   0  20      672.18      638.49     63.84 o
 -18   0  20       48.54       48.36     29.57 o
 -16   0  20        2.21       -2.90     24.44 o
 -14   0  20      524.40      506.93     69.59 o
 -12   0  20       56.50       42.82     47.23 o
 -10   0  20       11.09        5.44     23.98 o
  -8   0  20       26.36       35.58     28.85 o
  -6   0  20      594.30      662.83     66.01 o
  -4   0  20        9.42        5.22     25.81 o
  -2   0  20      146.50      285.50     50.70 o
 -21   1  20        5.51       -6.78     20.28 o
 -19   1  20      337.33      361.67     36.98 o
 -17   1  20      167.80      148.57     28.11 o
 -15   1  20       67.05       63.70     21.38 o
 -13   1  20       47.65       21.54     18.58 o
 -11   1  20       45.02       37.66     20.84 o
  -9   1  20       83.56       96.72     24.93 o
  -7   1  20        5.13        3.01     17.01 o
  -5   1  20      140.02      125.37     27.97 o
  -3   1  20       50.22       64.48     23.93 o
  -1   1  20       55.03       68.71     24.63 o
 -22   2  20      920.96      960.87     65.69 o
 -20   2  20       25.24       15.83     23.49 o
 -18   2  20      435.36      518.57     41.67 o
 -16   2  20       21.04        6.68     17.50 o
 -14   2  20       15.17       18.31     18.97 o
 -12   2  20      300.19      307.66     35.03 o
 -10   2  20      128.16      123.81     26.84 o
  -8   2  20       13.75       -4.22     16.18 o
  -6   2  20       43.11       59.33     23.08 o
  -4   2  20       20.54        4.28     19.38 o
  -2   2  20      168.83      219.16     39.31 o
 -21   3  20       18.70       16.12     24.66 o
 -19   3  20      893.36      987.54     54.57 o
 -17   3  20      241.81      220.90     32.03 o
 -15   3  20      210.60      209.94     31.35 o
 -13   3  20       45.08       41.06     20.46 o
 -11   3  20        3.09       -6.53     15.67 o
  -9   3  20       18.42        8.89     17.52 o
  -7   3  20       21.77       18.19     18.88 o
  -5   3  20     1364.58     1520.62     67.50 o
  -3   3  20      148.97      212.21     39.33 o
 -20   4  20       22.80       36.50     28.75 o
 -18   4  20      363.78      423.84     40.31 o
 -16   4  20     1034.80     1282.28     61.12 o
 -14   4  20       57.89       47.70     20.53 o
 -12   4  20        0.08        7.76     17.94 o
 -10   4  20      394.94      420.09     39.79 o
  -8   4  20       12.69       25.57     19.86 o
  -6   4  20      649.85      719.60     50.06 o
  -4   4  20       61.16       65.41     28.44 o
 -19   5  20      303.86      371.04     48.27 o
 -17   5  20       29.89       21.30     19.40 o
 -15   5  20       17.50       29.54     20.59 o
 -13   5  20       81.00       91.77     24.83 o
 -11   5  20       53.81       62.34     23.65 o
  -9   5  20       20.22       18.51     19.63 o
  -7   5  20        1.67       -2.18     18.18 o
  -5   5  20       24.71        6.40     22.24 o
 -16   6  20      259.60      150.57     68.99 o
 -14   6  20        6.59      -10.52     18.74 o
 -12   6  20        0.00       14.48     19.76 o
 -10   6  20      336.94      348.04     39.07 o
  -8   6  20      567.10      689.75     59.17 o
 -21   1  21       56.56       20.73     25.96 o
 -19   1  21       15.50       24.70     20.21 o
 -17   1  21      507.57      534.35     43.58 o
 -15   1  21       81.54       75.05     24.10 o
 -13   1  21        1.40        2.37     17.27 o
 -11   1  21       96.08      128.91     27.69 o
  -9   1  21      466.03      536.98     44.47 o
  -7   1  21       32.74       34.91     21.39 o
  -5   1  21      307.97      295.74     37.48 o
 -20   2  21      934.58      918.36     54.44 o
 -18   2  21      125.21      114.13     27.14 o
 -16   2  21      469.54      517.23     43.86 o
 -14   2  21        0.18      -12.07     16.43 o
 -12   2  21       20.55       10.18     17.34 o
 -10   2  21       17.14       34.73     21.51 o
  -8   2  21      232.34      268.31     35.48 o
  -6   2  21        5.42       23.68     20.12 o
  -4   2  21      112.06      143.65     33.30 o
 -19   3  21       50.21       45.39     22.59 o
 -17   3  21      102.25       77.52     24.73 o
 -15   3  21       15.57       14.05     19.54 o
 -13   3  21        1.55       31.64     19.74 o
 -11   3  21      482.56      514.97     44.07 o
  -9   3  21       74.45      114.47     28.02 o
  -7   3  21      116.92      124.94     29.86 o
  -5   3  21       38.90       49.41     23.25 o
 -18   4  21        0.55       -7.37     16.08 o
 -16   4  21        0.17      -17.08     17.24 o
 -14   4  21        4.24      -17.36     17.36 o
 -12   4  21       14.05       16.90     18.75 o
 -10   4  21       75.99      108.11     27.33 o
  -8   4  21        1.55       19.09     20.66 o
  -6   4  21      448.62      570.57     56.48 o
 -15   5  21       35.28       32.52     21.31 o
 -13   5  21      356.62      365.50     40.03 o
 -11   5  21        1.05        4.83     19.56 o
  -9   5  21       21.96       11.84     19.60 o
 -18   0  22       10.95       13.43     32.21 o
 -16   0  22       18.88       32.47     32.07 o
 -14   0  22      267.62      349.88     57.12 o
 -12   0  22      466.61      462.48     62.13 o
 -10   0  22       60.72       44.39     31.30 o
  -8   0  22      289.07      276.73     53.04 o
  -6   0  22      479.68      618.29    108.04 o
 -19   1  22      252.88      252.67     35.97 o
 -17   1  22       18.04       19.61     20.55 o
 -15   1  22       18.72       13.68     19.47 o
 -13   1  22        5.25        3.17     19.03 o
 -11   1  22       32.52       29.83     21.55 o
  -9   1  22      243.95      307.52     38.11 o
  -7   1  22       25.51       27.54     22.09 o
 -18   2  22       68.22       86.66     26.22 o
 -16   2  22      146.25      194.79     33.25 o
 -14   2  22       56.79       66.30     24.58 o
 -12   2  22      261.03      263.97     36.55 o
 -10   2  22      159.98      216.34     34.52 o
  -8   2  22       63.00       69.42     25.97 o
 -17   3  22       20.36       65.97     23.83 o
 -15   3  22       13.19       24.64     21.91 o
 -13   3  22       29.98       19.10     20.95 o
 -11   3  22        3.35        4.62     19.96 o
  -9   3  22      882.56     1087.15     61.35 o
 -14   4  22        3.37       -1.38     20.39 o
 -12   4  22       12.29       17.59     21.64 o
 -15   1  23      216.37      235.87     36.20 o
 -13   1  23       24.49       29.63     22.56 o
 
