# Supplementary material
Source: publisher figshare collection journal article supplement (https://acs.figshare.com/ndownloader/files/4106071)
Supplement: Supplementary file 2 [file 4106071 › polyIII-11s_sk36_pmdi12melt_0s.cif]

data_polyIII_11s_sk36_pmdi12melt_0s
 
_audit_creation_method            SHELXL-97
_chemical_name_systematic
;
 ?
;
_chemical_name_common             ?
_chemical_melting_point           ?
_chemical_formula_moiety          'C34 H48 N2 O4'
_chemical_formula_sum
 'C34 H48 N2 O4'
_chemical_formula_weight          548.74
 
loop_
 _atom_type_symbol
 _atom_type_description
 _atom_type_scat_dispersion_real
 _atom_type_scat_dispersion_imag
 _atom_type_scat_source
 'C'  'C'   0.0033   0.0016
 'International Tables Vol C Tables 4.2.6.8 and 6.1.1.4'
 'H'  'H'   0.0000   0.0000
 'International Tables Vol C Tables 4.2.6.8 and 6.1.1.4'
 'N'  'N'   0.0061   0.0033
 'International Tables Vol C Tables 4.2.6.8 and 6.1.1.4'
 'O'  'O'   0.0106   0.0060
 'International Tables Vol C Tables 4.2.6.8 and 6.1.1.4'
 
_symmetry_cell_setting            Triclinic
_symmetry_space_group_name_H-M    P-1
_symmetry_space_group_name_Hall   '-P 1'
 
loop_
 _symmetry_equiv_pos_as_xyz
 'x, y, z'
 '-x, -y, -z'
 
_cell_length_a                    8.1128(9)
_cell_length_b                    11.0482(11)
_cell_length_c                    17.788(2)
_cell_angle_alpha                 89.267(4)
_cell_angle_beta                  79.228(4)
_cell_angle_gamma                 78.377(4)
_cell_volume                      1533.7(3)
_cell_formula_units_Z             2
_cell_measurement_temperature     173(2)
_cell_measurement_reflns_used     804
_cell_measurement_theta_min       2.24
_cell_measurement_theta_max       19.54
 
_exptl_crystal_description        needle
_exptl_crystal_colour             colourless
_exptl_crystal_size_max           0.22
_exptl_crystal_size_mid           0.09
_exptl_crystal_size_min           0.07
_exptl_crystal_density_meas       ?
_exptl_crystal_density_diffrn     1.188
_exptl_crystal_density_method     'not measured'
_exptl_crystal_F_000              596
_exptl_absorpt_coefficient_mu     0.077
_exptl_absorpt_correction_type    none
_exptl_absorpt_correction_T_min   ?
_exptl_absorpt_correction_T_max   ?
_exptl_absorpt_process_details    ?
 
_exptl_special_details
;
 ?
;
 
_diffrn_ambient_temperature       173(2)
_diffrn_radiation_wavelength      0.71073
_diffrn_radiation_type            MoK\a
_diffrn_radiation_source          'fine-focus sealed tube'
_diffrn_radiation_monochromator   graphite
_diffrn_measurement_device_type   'Bruker APEX-II CCD'
_diffrn_measurement_method        '\f and \w scans'
_diffrn_detector_area_resol_mean  ?
_diffrn_standards_number          0
_diffrn_standards_interval_count  ?
_diffrn_standards_interval_time   ?
_diffrn_standards_decay_%         ?
_diffrn_reflns_number             8640
_diffrn_reflns_av_R_equivalents   0.0616
_diffrn_reflns_av_sigmaI/netI     0.2147
_diffrn_reflns_limit_h_min        -9
_diffrn_reflns_limit_h_max        9
_diffrn_reflns_limit_k_min        -13
_diffrn_reflns_limit_k_max        9
_diffrn_reflns_limit_l_min        -21
_diffrn_reflns_limit_l_max        21
_diffrn_reflns_theta_min          1.88
_diffrn_reflns_theta_max          25.00
_reflns_number_total              5377
_reflns_number_gt                 1928
_reflns_threshold_expression      >2sigma(I)
 
_computing_data_collection        'Bruker APEX2'
_computing_cell_refinement        'Bruker SAINT'
_computing_data_reduction         'Bruker SAINT'
_computing_structure_solution     'SHELXS-97 (Sheldrick, 2008)'
_computing_structure_refinement   'SHELXL-97 (Sheldrick, 1997)'
_computing_molecular_graphics     'Bruker SHELXTL'
_computing_publication_material   'Bruker SHELXTL'
 
_refine_special_details
;
 Refinement of F^2^ against ALL reflections.  The weighted R-factor wR and
 goodness of fit S are based on F^2^, conventional R-factors R are based
 on F, with F set to zero for negative F^2^. The threshold expression of
 F^2^ > 2sigma(F^2^) is used only for calculating R-factors(gt) etc. and is
 not relevant to the choice of reflections for refinement.  R-factors based
 on F^2^ are statistically about twice as large as those based on F, and R-
 factors based on ALL data will be even larger.
;
 
_refine_ls_structure_factor_coef  Fsqd
_refine_ls_matrix_type            full
_refine_ls_weighting_scheme       calc
_refine_ls_weighting_details
 'calc w=1/[\s^2^(Fo^2^)+(0.0557P)^2^+0.0000P] where P=(Fo^2^+2Fc^2^)/3'
_atom_sites_solution_primary      direct
_atom_sites_solution_secondary    difmap
_atom_sites_solution_hydrogens    geom
_refine_ls_hydrogen_treatment     constr
_refine_ls_extinction_method      none
_refine_ls_extinction_coef        ?
_refine_ls_number_reflns          5377
_refine_ls_number_parameters      361
_refine_ls_number_restraints      0
_refine_ls_R_factor_all           0.1766
_refine_ls_R_factor_gt            0.0488
_refine_ls_wR_factor_ref          0.1359
_refine_ls_wR_factor_gt           0.0908
_refine_ls_goodness_of_fit_ref    0.678
_refine_ls_restrained_S_all       0.678
_refine_ls_shift/su_max           0.010
_refine_ls_shift/su_mean          0.002
 
loop_
 _atom_site_label
 _atom_site_type_symbol
 _atom_site_fract_x
 _atom_site_fract_y
 _atom_site_fract_z
 _atom_site_U_iso_or_equiv
 _atom_site_adp_type
 _atom_site_occupancy
 _atom_site_symmetry_multiplicity
 _atom_site_calc_flag
 _atom_site_refinement_flags
 _atom_site_disorder_assembly
 _atom_site_disorder_group
C1A C -0.2138(4) 0.5126(3) 0.77405(18) 0.0313(9) Uani 1 1 d . . .
H1A H -0.2728 0.6006 0.7863 0.038 Uiso 1 1 calc R . .
C2A C -0.3469(4) 0.4337(3) 0.8009(2) 0.0394(10) Uani 1 1 d . . .
H2A H -0.3087 0.3525 0.7736 0.047 Uiso 1 1 calc R . .
H2B H -0.3516 0.4189 0.8562 0.047 Uiso 1 1 calc R . .
C3A C -0.5269(5) 0.4903(3) 0.7883(2) 0.0440(11) Uani 1 1 d . . .
H3A H -0.6019 0.4308 0.8050 0.053 Uiso 1 1 calc R . .
H3B H -0.5227 0.5016 0.7327 0.053 Uiso 1 1 calc R . .
C4A C -0.6087(5) 0.6141(3) 0.8298(2) 0.0439(11) Uani 1 1 d . . .
H4A H -0.5319 0.6729 0.8145 0.053 Uiso 1 1 calc R . .
H4B H -0.7177 0.6471 0.8124 0.053 Uiso 1 1 calc R . .
C5A C -0.6453(5) 0.6097(3) 0.9164(2) 0.0450(11) Uani 1 1 d . . .
H5A H -0.5446 0.5580 0.9332 0.054 Uiso 1 1 calc R . .
H5B H -0.7436 0.5687 0.9324 0.054 Uiso 1 1 calc R . .
C6A C -0.6854(5) 0.7358(3) 0.9575(2) 0.0513(12) Uani 1 1 d . . .
H6A H -0.7713 0.7925 0.9340 0.062 Uiso 1 1 calc R . .
H6B H -0.7374 0.7264 1.0117 0.062 Uiso 1 1 calc R . .
C7A C -0.5296(5) 0.7943(3) 0.9551(2) 0.0498(12) Uani 1 1 d . . .
H7A H -0.4695 0.7944 0.9013 0.060 Uiso 1 1 calc R . .
H7B H -0.5694 0.8815 0.9733 0.060 Uiso 1 1 calc R . .
C8A C -0.4027(5) 0.7290(3) 1.0031(2) 0.0466(11) Uani 1 1 d . . .
H8A H -0.4043 0.6397 1.0029 0.056 Uiso 1 1 calc R . .
H8B H -0.4420 0.7606 1.0566 0.056 Uiso 1 1 calc R . .
C9A C -0.2179(5) 0.7447(3) 0.9763(2) 0.0455(11) Uani 1 1 d . . .
H9A H -0.1491 0.7083 1.0146 0.055 Uiso 1 1 calc R . .
H9B H -0.2165 0.8342 0.9745 0.055 Uiso 1 1 calc R . .
C10A C -0.1325(5) 0.6851(3) 0.8977(2) 0.0433(11) Uani 1 1 d . . .
H10A H -0.2042 0.7187 0.8599 0.052 Uiso 1 1 calc R . .
H10B H -0.0200 0.7090 0.8821 0.052 Uiso 1 1 calc R . .
C11A C -0.1056(5) 0.5454(3) 0.89510(19) 0.0384(10) Uani 1 1 d . . .
H11A H -0.2116 0.5208 0.9220 0.046 Uiso 1 1 calc R . .
H11B H -0.0127 0.5109 0.9231 0.046 Uiso 1 1 calc R . .
C12A C -0.0594(4) 0.4887(3) 0.81357(19) 0.0358(10) Uani 1 1 d . . .
H12A H 0.0336 0.5246 0.7833 0.043 Uiso 1 1 calc R . .
H12B H -0.0168 0.3985 0.8158 0.043 Uiso 1 1 calc R . .
C13A C -0.0415(4) 0.4036(3) 0.6493(2) 0.0309(9) Uani 1 1 d . . .
C14A C -0.0079(4) 0.4409(3) 0.56768(19) 0.0288(9) Uani 1 1 d . . .
C15A C -0.1062(4) 0.5589(3) 0.56283(19) 0.0249(9) Uani 1 1 d . . .
C16A C -0.2087(4) 0.5970(3) 0.6409(2) 0.0295(9) Uani 1 1 d . . .
C17A C 0.1012(4) 0.3783(3) 0.50450(19) 0.0304(9) Uani 1 1 d . . .
H17A H 0.1677 0.2977 0.5076 0.036 Uiso 1 1 calc R . .
N1A N -0.1596(3) 0.5015(2) 0.68939(15) 0.0300(8) Uani 1 1 d . . .
O1A O 0.0218(3) 0.3080(2) 0.67594(13) 0.0471(8) Uani 1 1 d . . .
O2A O -0.3153(3) 0.6903(2) 0.65928(13) 0.0392(7) Uani 1 1 d . . .
C1B C 0.7729(4) 0.1091(3) 0.3700(2) 0.0352(10) Uani 1 1 d . . .
H1B H 0.8182 0.1314 0.3166 0.042 Uiso 1 1 calc R . .
C2B C 0.9219(5) 0.0313(3) 0.3990(2) 0.0441(11) Uani 1 1 d . . .
H2C H 0.9369 -0.0550 0.3804 0.053 Uiso 1 1 calc R . .
H2D H 0.8940 0.0317 0.4556 0.053 Uiso 1 1 calc R . .
C3B C 1.0891(5) 0.0736(4) 0.3749(2) 0.0510(12) Uani 1 1 d . . .
H3C H 1.1768 0.0212 0.3996 0.061 Uiso 1 1 calc R . .
H3D H 1.0743 0.1595 0.3942 0.061 Uiso 1 1 calc R . .
C4B C 1.1572(5) 0.0695(3) 0.2870(2) 0.0457(11) Uani 1 1 d . . .
H4C H 1.0676 0.1194 0.2622 0.055 Uiso 1 1 calc R . .
H4D H 1.2581 0.1090 0.2769 0.055 Uiso 1 1 calc R . .
C5B C 1.2072(5) -0.0571(3) 0.2503(2) 0.0508(12) Uani 1 1 d . . .
H5C H 1.1189 -0.1048 0.2716 0.061 Uiso 1 1 calc R . .
H5D H 1.3165 -0.0994 0.2644 0.061 Uiso 1 1 calc R . .
C6B C 1.2285(5) -0.0593(4) 0.1638(2) 0.0534(12) Uani 1 1 d . . .
H6C H 1.2888 -0.1430 0.1439 0.064 Uiso 1 1 calc R . .
H6D H 1.3015 -0.0004 0.1429 0.064 Uiso 1 1 calc R . .
C7B C 1.0567(5) -0.0258(4) 0.1346(2) 0.0523(12) Uani 1 1 d . . .
H7C H 0.9891 0.0524 0.1603 0.063 Uiso 1 1 calc R . .
H7D H 1.0815 -0.0112 0.0790 0.063 Uiso 1 1 calc R . .
C8B C 0.9499(5) -0.1240(4) 0.1486(2) 0.0512(12) Uani 1 1 d . . .
H8C H 0.9917 -0.1874 0.1068 0.061 Uiso 1 1 calc R . .
H8D H 0.9682 -0.1649 0.1970 0.061 Uiso 1 1 calc R . .
C9B C 0.7606(5) -0.0781(3) 0.1531(2) 0.0522(12) Uani 1 1 d . . .
H9C H 0.7049 -0.1505 0.1562 0.063 Uiso 1 1 calc R . .
H9D H 0.7426 -0.0358 0.1051 0.063 Uiso 1 1 calc R . .
C10B C 0.6698(5) 0.0113(3) 0.2213(2) 0.0440(11) Uani 1 1 d . . .
H10C H 0.7286 0.0818 0.2202 0.053 Uiso 1 1 calc R . .
H10D H 0.5503 0.0446 0.2152 0.053 Uiso 1 1 calc R . .
C11B C 0.6674(5) -0.0484(3) 0.2975(2) 0.0452(11) Uani 1 1 d . . .
H11C H 0.7812 -0.1017 0.2976 0.054 Uiso 1 1 calc R . .
H11D H 0.5822 -0.1023 0.3042 0.054 Uiso 1 1 calc R . .
C12B C 0.6246(5) 0.0425(3) 0.3652(2) 0.0439(11) Uani 1 1 d . . .
H12C H 0.5986 -0.0024 0.4131 0.053 Uiso 1 1 calc R . .
H12D H 0.5209 0.1049 0.3607 0.053 Uiso 1 1 calc R . .
C13B C 0.6059(5) 0.2401(3) 0.4876(2) 0.0373(10) Uani 1 1 d . . .
C14B C 0.5426(4) 0.3752(3) 0.50249(19) 0.0286(9) Uani 1 1 d . . .
C15B C 0.6070(4) 0.4363(3) 0.43944(19) 0.0272(9) Uani 1 1 d . . .
C16B C 0.7200(4) 0.3422(3) 0.3829(2) 0.0303(9) Uani 1 1 d . . .
C17B C 0.4323(4) 0.4360(3) 0.56613(19) 0.0322(9) Uani 1 1 d . . .
H17B H 0.3876 0.3939 0.6097 0.039 Uiso 1 1 calc R . .
N1B N 0.7075(3) 0.2269(2) 0.41434(15) 0.0300(8) Uani 1 1 d . . .
O1B O 0.5769(4) 0.1566(2) 0.52957(15) 0.0549(8) Uani 1 1 d . . .
O2B O 0.8069(3) 0.3588(2) 0.32231(13) 0.0392(7) Uani 1 1 d . . .
 
loop_
 _atom_site_aniso_label
 _atom_site_aniso_U_11
 _atom_site_aniso_U_22
 _atom_site_aniso_U_33
 _atom_site_aniso_U_23
 _atom_site_aniso_U_13
 _atom_site_aniso_U_12
C1A 0.032(2) 0.034(2) 0.024(2) -0.0002(18) 0.0012(18) -0.0024(18)
C2A 0.042(3) 0.041(2) 0.033(2) -0.002(2) 0.000(2) -0.008(2)
C3A 0.042(3) 0.055(3) 0.039(2) -0.002(2) -0.009(2) -0.016(2)
C4A 0.033(2) 0.057(3) 0.038(3) -0.004(2) -0.0059(19) 0.000(2)
C5A 0.035(3) 0.057(3) 0.042(3) 0.002(2) -0.002(2) -0.011(2)
C6A 0.044(3) 0.053(3) 0.048(3) -0.006(2) -0.002(2) 0.004(2)
C7A 0.051(3) 0.043(2) 0.052(3) -0.008(2) -0.011(2) 0.000(2)
C8A 0.048(3) 0.054(3) 0.034(2) -0.009(2) -0.007(2) -0.003(2)
C9A 0.055(3) 0.047(3) 0.036(2) -0.007(2) -0.011(2) -0.011(2)
C10A 0.043(3) 0.044(3) 0.044(3) -0.002(2) -0.004(2) -0.015(2)
C11A 0.038(3) 0.049(3) 0.028(2) 0.002(2) -0.0055(19) -0.008(2)
C12A 0.037(2) 0.035(2) 0.031(2) 0.0022(19) -0.0024(19) -0.0008(18)
C13A 0.033(2) 0.030(2) 0.027(2) -0.0021(19) -0.0023(18) -0.0022(19)
C14A 0.034(2) 0.027(2) 0.024(2) 0.0007(18) -0.0053(18) -0.0045(18)
C15A 0.023(2) 0.025(2) 0.026(2) -0.0020(18) -0.0060(17) -0.0028(16)
C16A 0.030(2) 0.029(2) 0.030(2) -0.0008(19) -0.0087(18) -0.0049(18)
C17A 0.032(2) 0.027(2) 0.029(2) -0.0059(19) -0.0084(18) 0.0035(18)
N1A 0.0320(19) 0.0262(17) 0.0268(18) -0.0038(15) -0.0011(15) 0.0019(14)
O1A 0.063(2) 0.0359(16) 0.0308(16) 0.0020(13) -0.0032(14) 0.0127(14)
O2A 0.0443(17) 0.0301(14) 0.0338(16) -0.0016(13) 0.0024(13) 0.0058(13)
C1B 0.036(2) 0.035(2) 0.029(2) -0.0058(19) -0.0015(18) 0.0021(19)
C2B 0.046(3) 0.047(3) 0.034(2) -0.004(2) -0.003(2) -0.001(2)
C3B 0.045(3) 0.058(3) 0.056(3) -0.001(2) -0.019(2) -0.015(2)
C4B 0.026(2) 0.057(3) 0.057(3) -0.012(2) -0.003(2) -0.017(2)
C5B 0.036(3) 0.053(3) 0.063(3) -0.008(2) -0.012(2) -0.003(2)
C6B 0.048(3) 0.058(3) 0.044(3) -0.005(2) 0.008(2) -0.003(2)
C7B 0.058(3) 0.057(3) 0.042(3) -0.003(2) -0.002(2) -0.018(2)
C8B 0.058(3) 0.049(3) 0.047(3) -0.010(2) -0.004(2) -0.015(2)
C9B 0.052(3) 0.044(3) 0.064(3) -0.011(2) -0.024(2) -0.005(2)
C10B 0.040(3) 0.048(3) 0.046(3) 0.003(2) -0.020(2) -0.004(2)
C11B 0.041(3) 0.044(2) 0.053(3) 0.002(2) -0.011(2) -0.012(2)
C12B 0.042(3) 0.036(2) 0.048(3) -0.005(2) 0.008(2) -0.009(2)
C13B 0.046(3) 0.027(2) 0.036(3) 0.002(2) 0.000(2) -0.009(2)
C14B 0.029(2) 0.030(2) 0.027(2) -0.0044(19) -0.0002(18) -0.0103(17)
C15B 0.025(2) 0.027(2) 0.028(2) -0.0035(19) -0.0005(17) -0.0065(17)
C16B 0.029(2) 0.033(2) 0.030(2) -0.003(2) -0.0035(19) -0.0075(18)
C17B 0.041(2) 0.029(2) 0.026(2) 0.0022(19) -0.0019(18) -0.0102(18)
N1B 0.038(2) 0.0240(17) 0.0248(18) -0.0015(15) 0.0035(15) -0.0074(14)
O1B 0.080(2) 0.0306(15) 0.0427(18) 0.0028(14) 0.0163(15) -0.0103(15)
O2B 0.0431(17) 0.0375(15) 0.0301(16) -0.0015(13) 0.0075(13) -0.0053(13)
 
_geom_special_details
;
 All esds (except the esd in the dihedral angle between two l.s. planes)
 are estimated using the full covariance matrix.  The cell esds are taken
 into account individually in the estimation of esds in distances, angles
 and torsion angles; correlations between esds in cell parameters are only
 used when they are defined by crystal symmetry.  An approximate (isotropic)
 treatment of cell esds is used for estimating esds involving l.s. planes.
;
 
loop_
 _geom_bond_atom_site_label_1
 _geom_bond_atom_site_label_2
 _geom_bond_distance
 _geom_bond_site_symmetry_2
 _geom_bond_publ_flag
C1A N1A 1.487(4) . ?
C1A C12A 1.525(4) . ?
C1A C2A 1.525(5) . ?
C1A H1A 1.0000 . ?
C2A C3A 1.525(4) . ?
C2A H2A 0.9900 . ?
C2A H2B 0.9900 . ?
C3A C4A 1.528(4) . ?
C3A H3A 0.9900 . ?
C3A H3B 0.9900 . ?
C4A C5A 1.515(4) . ?
C4A H4A 0.9900 . ?
C4A H4B 0.9900 . ?
C5A C6A 1.529(4) . ?
C5A H5A 0.9900 . ?
C5A H5B 0.9900 . ?
C6A C7A 1.525(5) . ?
C6A H6A 0.9900 . ?
C6A H6B 0.9900 . ?
C7A C8A 1.524(5) . ?
C7A H7A 0.9900 . ?
C7A H7B 0.9900 . ?
C8A C9A 1.530(5) . ?
C8A H8A 0.9900 . ?
C8A H8B 0.9900 . ?
C9A C10A 1.532(4) . ?
C9A H9A 0.9900 . ?
C9A H9B 0.9900 . ?
C10A C11A 1.515(4) . ?
C10A H10A 0.9900 . ?
C10A H10B 0.9900 . ?
C11A C12A 1.537(4) . ?
C11A H11A 0.9900 . ?
C11A H11B 0.9900 . ?
C12A H12A 0.9900 . ?
C12A H12B 0.9900 . ?
C13A O1A 1.210(4) . ?
C13A N1A 1.393(4) . ?
C13A C14A 1.495(4) . ?
C14A C17A 1.388(4) . ?
C14A C15A 1.395(4) . ?
C15A C17A 1.375(4) 2_566 ?
C15A C16A 1.497(4) . ?
C16A O2A 1.208(3) . ?
C16A N1A 1.397(4) . ?
C17A C15A 1.375(4) 2_566 ?
C17A H17A 0.9500 . ?
C1B N1B 1.479(4) . ?
C1B C2B 1.506(4) . ?
C1B C12B 1.547(5) . ?
C1B H1B 1.0000 . ?
C2B C3B 1.508(5) . ?
C2B H2C 0.9900 . ?
C2B H2D 0.9900 . ?
C3B C4B 1.556(5) . ?
C3B H3C 0.9900 . ?
C3B H3D 0.9900 . ?
C4B C5B 1.497(4) . ?
C4B H4C 0.9900 . ?
C4B H4D 0.9900 . ?
C5B C6B 1.516(5) . ?
C5B H5C 0.9900 . ?
C5B H5D 0.9900 . ?
C6B C7B 1.551(5) . ?
C6B H6C 0.9900 . ?
C6B H6D 0.9900 . ?
C7B C8B 1.511(5) . ?
C7B H7C 0.9900 . ?
C7B H7D 0.9900 . ?
C8B C9B 1.505(5) . ?
C8B H8C 0.9900 . ?
C8B H8D 0.9900 . ?
C9B C10B 1.547(5) . ?
C9B H9C 0.9900 . ?
C9B H9D 0.9900 . ?
C10B C11B 1.498(5) . ?
C10B H10C 0.9900 . ?
C10B H10D 0.9900 . ?
C11B C12B 1.522(4) . ?
C11B H11C 0.9900 . ?
C11B H11D 0.9900 . ?
C12B H12C 0.9900 . ?
C12B H12D 0.9900 . ?
C13B O1B 1.212(4) . ?
C13B N1B 1.397(4) . ?
C13B C14B 1.487(4) . ?
C14B C15B 1.376(4) . ?
C14B C17B 1.390(4) . ?
C15B C17B 1.388(4) 2_666 ?
C15B C16B 1.494(4) . ?
C16B O2B 1.206(4) . ?
C16B N1B 1.400(4) . ?
C17B C15B 1.388(4) 2_666 ?
C17B H17B 0.9500 . ?
 
loop_
 _geom_angle_atom_site_label_1
 _geom_angle_atom_site_label_2
 _geom_angle_atom_site_label_3
 _geom_angle
 _geom_angle_site_symmetry_1
 _geom_angle_site_symmetry_3
 _geom_angle_publ_flag
N1A C1A C12A 111.2(3) . . ?
N1A C1A C2A 110.1(3) . . ?
C12A C1A C2A 115.1(3) . . ?
N1A C1A H1A 106.6 . . ?
C12A C1A H1A 106.6 . . ?
C2A C1A H1A 106.6 . . ?
C3A C2A C1A 114.6(3) . . ?
C3A C2A H2A 108.6 . . ?
C1A C2A H2A 108.6 . . ?
C3A C2A H2B 108.6 . . ?
C1A C2A H2B 108.6 . . ?
H2A C2A H2B 107.6 . . ?
C2A C3A C4A 115.4(3) . . ?
C2A C3A H3A 108.4 . . ?
C4A C3A H3A 108.4 . . ?
C2A C3A H3B 108.4 . . ?
C4A C3A H3B 108.4 . . ?
H3A C3A H3B 107.5 . . ?
C5A C4A C3A 115.2(3) . . ?
C5A C4A H4A 108.5 . . ?
C3A C4A H4A 108.5 . . ?
C5A C4A H4B 108.5 . . ?
C3A C4A H4B 108.5 . . ?
H4A C4A H4B 107.5 . . ?
C4A C5A C6A 114.7(3) . . ?
C4A C5A H5A 108.6 . . ?
C6A C5A H5A 108.6 . . ?
C4A C5A H5B 108.6 . . ?
C6A C5A H5B 108.6 . . ?
H5A C5A H5B 107.6 . . ?
C7A C6A C5A 114.1(3) . . ?
C7A C6A H6A 108.7 . . ?
C5A C6A H6A 108.7 . . ?
C7A C6A H6B 108.7 . . ?
C5A C6A H6B 108.7 . . ?
H6A C6A H6B 107.6 . . ?
C8A C7A C6A 114.1(3) . . ?
C8A C7A H7A 108.7 . . ?
C6A C7A H7A 108.7 . . ?
C8A C7A H7B 108.7 . . ?
C6A C7A H7B 108.7 . . ?
H7A C7A H7B 107.6 . . ?
C7A C8A C9A 115.0(4) . . ?
C7A C8A H8A 108.5 . . ?
C9A C8A H8A 108.5 . . ?
C7A C8A H8B 108.5 . . ?
C9A C8A H8B 108.5 . . ?
H8A C8A H8B 107.5 . . ?
C8A C9A C10A 114.2(3) . . ?
C8A C9A H9A 108.7 . . ?
C10A C9A H9A 108.7 . . ?
C8A C9A H9B 108.7 . . ?
C10A C9A H9B 108.7 . . ?
H9A C9A H9B 107.6 . . ?
C11A C10A C9A 114.2(3) . . ?
C11A C10A H10A 108.7 . . ?
C9A C10A H10A 108.7 . . ?
C11A C10A H10B 108.7 . . ?
C9A C10A H10B 108.7 . . ?
H10A C10A H10B 107.6 . . ?
C10A C11A C12A 113.8(3) . . ?
C10A C11A H11A 108.8 . . ?
C12A C11A H11A 108.8 . . ?
C10A C11A H11B 108.8 . . ?
C12A C11A H11B 108.8 . . ?
H11A C11A H11B 107.7 . . ?
C1A C12A C11A 111.4(3) . . ?
C1A C12A H12A 109.4 . . ?
C11A C12A H12A 109.4 . . ?
C1A C12A H12B 109.4 . . ?
C11A C12A H12B 109.4 . . ?
H12A C12A H12B 108.0 . . ?
O1A C13A N1A 126.4(3) . . ?
O1A C13A C14A 127.1(3) . . ?
N1A C13A C14A 106.5(3) . . ?
C17A C14A C15A 122.2(3) . . ?
C17A C14A C13A 130.0(3) . . ?
C15A C14A C13A 107.8(3) . . ?
C17A C15A C14A 122.5(3) 2_566 . ?
C17A C15A C16A 129.7(3) 2_566 . ?
C14A C15A C16A 107.7(3) . . ?
O2A C16A N1A 126.0(3) . . ?
O2A C16A C15A 127.7(3) . . ?
N1A C16A C15A 106.3(3) . . ?
C15A C17A C14A 115.2(3) 2_566 . ?
C15A C17A H17A 122.4 2_566 . ?
C14A C17A H17A 122.4 . . ?
C13A N1A C16A 111.6(3) . . ?
C13A N1A C1A 125.5(3) . . ?
C16A N1A C1A 122.6(3) . . ?
N1B C1B C2B 111.5(3) . . ?
N1B C1B C12B 110.5(3) . . ?
C2B C1B C12B 114.8(3) . . ?
N1B C1B H1B 106.5 . . ?
C2B C1B H1B 106.5 . . ?
C12B C1B H1B 106.5 . . ?
C1B C2B C3B 114.4(3) . . ?
C1B C2B H2C 108.7 . . ?
C3B C2B H2C 108.7 . . ?
C1B C2B H2D 108.7 . . ?
C3B C2B H2D 108.7 . . ?
H2C C2B H2D 107.6 . . ?
C2B C3B C4B 114.9(3) . . ?
C2B C3B H3C 108.5 . . ?
C4B C3B H3C 108.5 . . ?
C2B C3B H3D 108.5 . . ?
C4B C3B H3D 108.5 . . ?
H3C C3B H3D 107.5 . . ?
C5B C4B C3B 115.2(4) . . ?
C5B C4B H4C 108.5 . . ?
C3B C4B H4C 108.5 . . ?
C5B C4B H4D 108.5 . . ?
C3B C4B H4D 108.5 . . ?
H4C C4B H4D 107.5 . . ?
C4B C5B C6B 114.7(4) . . ?
C4B C5B H5C 108.6 . . ?
C6B C5B H5C 108.6 . . ?
C4B C5B H5D 108.6 . . ?
C6B C5B H5D 108.6 . . ?
H5C C5B H5D 107.6 . . ?
C5B C6B C7B 113.7(3) . . ?
C5B C6B H6C 108.8 . . ?
C7B C6B H6C 108.8 . . ?
C5B C6B H6D 108.8 . . ?
C7B C6B H6D 108.8 . . ?
H6C C6B H6D 107.7 . . ?
C8B C7B C6B 113.8(4) . . ?
C8B C7B H7C 108.8 . . ?
C6B C7B H7C 108.8 . . ?
C8B C7B H7D 108.8 . . ?
C6B C7B H7D 108.8 . . ?
H7C C7B H7D 107.7 . . ?
C9B C8B C7B 115.1(3) . . ?
C9B C8B H8C 108.5 . . ?
C7B C8B H8C 108.5 . . ?
C9B C8B H8D 108.5 . . ?
C7B C8B H8D 108.5 . . ?
H8C C8B H8D 107.5 . . ?
C8B C9B C10B 115.4(3) . . ?
C8B C9B H9C 108.4 . . ?
C10B C9B H9C 108.4 . . ?
C8B C9B H9D 108.4 . . ?
C10B C9B H9D 108.4 . . ?
H9C C9B H9D 107.5 . . ?
C11B C10B C9B 113.2(3) . . ?
C11B C10B H10C 108.9 . . ?
C9B C10B H10C 108.9 . . ?
C11B C10B H10D 108.9 . . ?
C9B C10B H10D 108.9 . . ?
H10C C10B H10D 107.7 . . ?
C10B C11B C12B 114.2(3) . . ?
C10B C11B H11C 108.7 . . ?
C12B C11B H11C 108.7 . . ?
C10B C11B H11D 108.7 . . ?
C12B C11B H11D 108.7 . . ?
H11C C11B H11D 107.6 . . ?
C11B C12B C1B 112.4(3) . . ?
C11B C12B H12C 109.1 . . ?
C1B C12B H12C 109.1 . . ?
C11B C12B H12D 109.1 . . ?
C1B C12B H12D 109.1 . . ?
H12C C12B H12D 107.9 . . ?
O1B C13B N1B 125.9(3) . . ?
O1B C13B C14B 127.8(3) . . ?
N1B C13B C14B 106.3(3) . . ?
C15B C14B C17B 122.8(3) . . ?
C15B C14B C13B 108.3(3) . . ?
C17B C14B C13B 128.8(3) . . ?
C14B C15B C17B 122.9(3) . 2_666 ?
C14B C15B C16B 108.0(3) . . ?
C17B C15B C16B 129.0(3) 2_666 . ?
O2B C16B N1B 125.5(3) . . ?
O2B C16B C15B 128.5(3) . . ?
N1B C16B C15B 106.1(3) . . ?
C15B C17B C14B 114.3(3) 2_666 . ?
C15B C17B H17B 122.9 2_666 . ?
C14B C17B H17B 122.9 . . ?
C13B N1B C16B 111.1(3) . . ?
C13B N1B C1B 125.3(3) . . ?
C16B N1B C1B 123.0(3) . . ?
 
loop_
 _geom_torsion_atom_site_label_1
 _geom_torsion_atom_site_label_2
 _geom_torsion_atom_site_label_3
 _geom_torsion_atom_site_label_4
 _geom_torsion
 _geom_torsion_site_symmetry_1
 _geom_torsion_site_symmetry_2
 _geom_torsion_site_symmetry_3
 _geom_torsion_site_symmetry_4
 _geom_torsion_publ_flag
N1A C1A C2A C3A -77.7(3) . . . . ?
C12A C1A C2A C3A 155.7(3) . . . . ?
C1A C2A C3A C4A -61.0(4) . . . . ?
C2A C3A C4A C5A -65.5(4) . . . . ?
C3A C4A C5A C6A 165.8(3) . . . . ?
C4A C5A C6A C7A -73.6(4) . . . . ?
C5A C6A C7A C8A -69.9(4) . . . . ?
C6A C7A C8A C9A 154.1(3) . . . . ?
C7A C8A C9A C10A -65.5(4) . . . . ?
C8A C9A C10A C11A -65.8(4) . . . . ?
C9A C10A C11A C12A 166.6(3) . . . . ?
N1A C1A C12A C11A 158.7(3) . . . . ?
C2A C1A C12A C11A -75.2(4) . . . . ?
C10A C11A C12A C1A -72.5(4) . . . . ?
O1A C13A C14A C17A -0.6(6) . . . . ?
N1A C13A C14A C17A 178.8(3) . . . . ?
O1A C13A C14A C15A -179.2(4) . . . . ?
N1A C13A C14A C15A 0.3(4) . . . . ?
C17A C14A C15A C17A -0.5(6) . . . 2_566 ?
C13A C14A C15A C17A 178.2(3) . . . 2_566 ?
C17A C14A C15A C16A 179.5(3) . . . . ?
C13A C14A C15A C16A -1.8(4) . . . . ?
C17A C15A C16A O2A 4.0(6) 2_566 . . . ?
C14A C15A C16A O2A -176.0(3) . . . . ?
C17A C15A C16A N1A -177.2(3) 2_566 . . . ?
C14A C15A C16A N1A 2.8(4) . . . . ?
C15A C14A C17A C15A 0.5(6) . . . 2_566 ?
C13A C14A C17A C15A -177.9(3) . . . 2_566 ?
O1A C13A N1A C16A -179.0(4) . . . . ?
C14A C13A N1A C16A 1.6(4) . . . . ?
O1A C13A N1A C1A 7.8(6) . . . . ?
C14A C13A N1A C1A -171.6(3) . . . . ?
O2A C16A N1A C13A 176.2(3) . . . . ?
C15A C16A N1A C13A -2.7(4) . . . . ?
O2A C16A N1A C1A -10.4(5) . . . . ?
C15A C16A N1A C1A 170.8(3) . . . . ?
C12A C1A N1A C13A 49.0(4) . . . . ?
C2A C1A N1A C13A -79.8(4) . . . . ?
C12A C1A N1A C16A -123.5(3) . . . . ?
C2A C1A N1A C16A 107.7(3) . . . . ?
N1B C1B C2B C3B -76.8(4) . . . . ?
C12B C1B C2B C3B 156.6(3) . . . . ?
C1B C2B C3B C4B -62.4(4) . . . . ?
C2B C3B C4B C5B -65.6(4) . . . . ?
C3B C4B C5B C6B 164.7(3) . . . . ?
C4B C5B C6B C7B -72.7(4) . . . . ?
C5B C6B C7B C8B -70.8(4) . . . . ?
C6B C7B C8B C9B 155.2(3) . . . . ?
C7B C8B C9B C10B -64.7(5) . . . . ?
C8B C9B C10B C11B -66.1(5) . . . . ?
C9B C10B C11B C12B 164.0(3) . . . . ?
C10B C11B C12B C1B -72.1(4) . . . . ?
N1B C1B C12B C11B 157.6(3) . . . . ?
C2B C1B C12B C11B -75.2(4) . . . . ?
O1B C13B C14B C15B 179.9(4) . . . . ?
N1B C13B C14B C15B -0.1(4) . . . . ?
O1B C13B C14B C17B -2.4(7) . . . . ?
N1B C13B C14B C17B 177.6(3) . . . . ?
C17B C14B C15B C17B 0.0(6) . . . 2_666 ?
C13B C14B C15B C17B 177.9(3) . . . 2_666 ?
C17B C14B C15B C16B 179.9(3) . . . . ?
C13B C14B C15B C16B -2.2(4) . . . . ?
C14B C15B C16B O2B -175.8(4) . . . . ?
C17B C15B C16B O2B 4.1(6) 2_666 . . . ?
C14B C15B C16B N1B 3.7(4) . . . . ?
C17B C15B C16B N1B -176.4(3) 2_666 . . . ?
C15B C14B C17B C15B 0.0(6) . . . 2_666 ?
C13B C14B C17B C15B -177.4(3) . . . 2_666 ?
O1B C13B N1B C16B -177.5(4) . . . . ?
C14B C13B N1B C16B 2.6(4) . . . . ?
O1B C13B N1B C1B 11.1(6) . . . . ?
C14B C13B N1B C1B -168.8(3) . . . . ?
O2B C16B N1B C13B 175.6(4) . . . . ?
C15B C16B N1B C13B -3.8(4) . . . . ?
O2B C16B N1B C1B -12.7(5) . . . . ?
C15B C16B N1B C1B 167.8(3) . . . . ?
C2B C1B N1B C13B -76.4(4) . . . . ?
C12B C1B N1B C13B 52.6(4) . . . . ?
C2B C1B N1B C16B 113.2(4) . . . . ?
C12B C1B N1B C16B -117.8(3) . . . . ?
 
_diffrn_measured_fraction_theta_max    0.995
_diffrn_reflns_theta_full              25.00
_diffrn_measured_fraction_theta_full   0.995
_refine_diff_density_max    0.219
_refine_diff_density_min   -0.179
_refine_diff_density_rms    0.041

_iucr_refine_instructions_details
;
TITL 11s_sk36_pmdi12melt_0s in P-1
CELL  0.71073   8.1128  11.0482  17.7882   89.267   79.228   78.377
ZERR     2.00   0.0009   0.0011   0.0021    0.004    0.004    0.004
LATT   1
SFAC  C    H    N    O
UNIT  68   96   4    8
MERG   2
OMIT    -2.00  50.00
FMAP   2
PLAN    5
SIZE     0.07   0.09   0.22
OMIT 0 0 1
ACTA
BOND   $H
CONF
L.S.   4
TEMP  -100.00
WGHT    0.055700
FVAR       0.33413
MOLE    1
C1A   1   -0.213847    0.512589    0.774046    11.00000    0.03200    0.03408 =
         0.02361   -0.00022    0.00117   -0.00243
AFIX  13
H1A   2   -0.272842    0.600558    0.786264    11.00000   -1.20000
AFIX   0
C2A   1   -0.346861    0.433742    0.800893    11.00000    0.04166    0.04080 =
         0.03295   -0.00212    0.00014   -0.00812
AFIX  23
H2A   2   -0.308746    0.352527    0.773572    11.00000   -1.20000
H2B   2   -0.351555    0.418903    0.856186    11.00000   -1.20000
AFIX   0
C3A   1   -0.526934    0.490289    0.788312    11.00000    0.04164    0.05462 =
         0.03905   -0.00188   -0.00945   -0.01586
AFIX  23
H3A   2   -0.601944    0.430755    0.805043    11.00000   -1.20000
H3B   2   -0.522697    0.501611    0.732734    11.00000   -1.20000
AFIX   0
C4A   1   -0.608744    0.614117    0.829832    11.00000    0.03284    0.05696 =
         0.03795   -0.00384   -0.00585   -0.00011
AFIX  23
H4A   2   -0.531892    0.672899    0.814471    11.00000   -1.20000
H4B   2   -0.717745    0.647124    0.812441    11.00000   -1.20000
AFIX   0
C5A   1   -0.645296    0.609658    0.916399    11.00000    0.03511    0.05667 =
         0.04202    0.00217   -0.00219   -0.01102
AFIX  23
H5A   2   -0.544649    0.558011    0.933159    11.00000   -1.20000
H5B   2   -0.743641    0.568672    0.932417    11.00000   -1.20000
AFIX   0
C6A   1   -0.685427    0.735763    0.957545    11.00000    0.04423    0.05325 =
         0.04802   -0.00553   -0.00213    0.00383
AFIX  23
H6A   2   -0.771327    0.792522    0.934026    11.00000   -1.20000
H6B   2   -0.737438    0.726371    1.011705    11.00000   -1.20000
AFIX   0
C7A   1   -0.529622    0.794305    0.955081    11.00000    0.05057    0.04333 =
         0.05247   -0.00751   -0.01116   -0.00029
AFIX  23
H7A   2   -0.469507    0.794403    0.901260    11.00000   -1.20000
H7B   2   -0.569431    0.881453    0.973318    11.00000   -1.20000
AFIX   0
C8A   1   -0.402694    0.729040    1.003107    11.00000    0.04838    0.05389 =
         0.03431   -0.00898   -0.00690   -0.00278
AFIX  23
H8A   2   -0.404263    0.639677    1.002922    11.00000   -1.20000
H8B   2   -0.441988    0.760621    1.056631    11.00000   -1.20000
AFIX   0
C9A   1   -0.217856    0.744749    0.976337    11.00000    0.05522    0.04669 =
         0.03581   -0.00724   -0.01111   -0.01058
AFIX  23
H9A   2   -0.149092    0.708296    1.014565    11.00000   -1.20000
H9B   2   -0.216529    0.834151    0.974537    11.00000   -1.20000
AFIX   0
C10A  1   -0.132506    0.685145    0.897705    11.00000    0.04265    0.04377 =
         0.04424   -0.00219   -0.00376   -0.01456
AFIX  23
H10A  2   -0.204164    0.718722    0.859921    11.00000   -1.20000
H10B  2   -0.019996    0.708998    0.882071    11.00000   -1.20000
AFIX   0
C11A  1   -0.105578    0.545434    0.895098    11.00000    0.03783    0.04889 =
         0.02788    0.00204   -0.00549   -0.00799
AFIX  23
H11A  2   -0.211577    0.520792    0.922026    11.00000   -1.20000
H11B  2   -0.012710    0.510913    0.923066    11.00000   -1.20000
AFIX   0
C12A  1   -0.059395    0.488704    0.813574    11.00000    0.03692    0.03502 =
         0.03111    0.00221   -0.00236   -0.00081
AFIX  23
H12A  2    0.033586    0.524646    0.783300    11.00000   -1.20000
H12B  2   -0.016784    0.398480    0.815841    11.00000   -1.20000
AFIX   0
C13A  1   -0.041520    0.403626    0.649317    11.00000    0.03299    0.02967 =
         0.02706   -0.00214   -0.00232   -0.00219
C14A  1   -0.007872    0.440928    0.567677    11.00000    0.03436    0.02739 =
         0.02381    0.00066   -0.00529   -0.00455
C15A  1   -0.106243    0.558887    0.562826    11.00000    0.02346    0.02463 =
         0.02624   -0.00205   -0.00604   -0.00277
C16A  1   -0.208744    0.597028    0.640943    11.00000    0.02996    0.02922 =
         0.03013   -0.00080   -0.00866   -0.00487
C17A  1    0.101200    0.378280    0.504502    11.00000    0.03161    0.02731 =
         0.02931   -0.00592   -0.00838    0.00351
AFIX  43
H17A  2    0.167651    0.297703    0.507571    11.00000   -1.20000
AFIX   0
N1A   3   -0.159597    0.501472    0.689387    11.00000    0.03202    0.02623 =
         0.02685   -0.00385   -0.00105    0.00191
O1A   4    0.021763    0.307977    0.675938    11.00000    0.06269    0.03593 =
         0.03082    0.00195   -0.00318    0.01274
O2A   4   -0.315266    0.690252    0.659279    11.00000    0.04427    0.03010 =
         0.03383   -0.00159    0.00236    0.00581
MOLE    2
C1B   1    0.772881    0.109136    0.370039    11.00000    0.03562    0.03503 =
         0.02936   -0.00577   -0.00147    0.00211
AFIX  13
H1B   2    0.818248    0.131367    0.316570    11.00000   -1.20000
AFIX   0
C2B   1    0.921920    0.031343    0.399027    11.00000    0.04555    0.04714 =
         0.03423   -0.00361   -0.00320   -0.00066
AFIX  23
H2C   2    0.936938   -0.054984    0.380431    11.00000   -1.20000
H2D   2    0.894049    0.031706    0.455646    11.00000   -1.20000
AFIX   0
C3B   1    1.089078    0.073631    0.374896    11.00000    0.04513    0.05781 =
         0.05578   -0.00135   -0.01886   -0.01462
AFIX  23
H3C   2    1.176820    0.021166    0.399607    11.00000   -1.20000
H3D   2    1.074299    0.159507    0.394246    11.00000   -1.20000
AFIX   0
C4B   1    1.157213    0.069492    0.287001    11.00000    0.02567    0.05701 =
         0.05655   -0.01245   -0.00270   -0.01736
AFIX  23
H4C   2    1.067643    0.119438    0.262156    11.00000   -1.20000
H4D   2    1.258146    0.108983    0.276902    11.00000   -1.20000
AFIX   0
C5B   1    1.207205   -0.057074    0.250318    11.00000    0.03583    0.05253 =
         0.06316   -0.00799   -0.01236   -0.00325
AFIX  23
H5C   2    1.118880   -0.104794    0.271559    11.00000   -1.20000
H5D   2    1.316482   -0.099401    0.264383    11.00000   -1.20000
AFIX   0
C6B   1    1.228529   -0.059330    0.163810    11.00000    0.04798    0.05815 =
         0.04446   -0.00495    0.00752   -0.00322
AFIX  23
H6C   2    1.288845   -0.142964    0.143894    11.00000   -1.20000
H6D   2    1.301512   -0.000393    0.142862    11.00000   -1.20000
AFIX   0
C7B   1    1.056726   -0.025767    0.134644    11.00000    0.05817    0.05684 =
         0.04202   -0.00327   -0.00208   -0.01816
AFIX  23
H7C   2    0.989110    0.052356    0.160317    11.00000   -1.20000
H7D   2    1.081521   -0.011211    0.079014    11.00000   -1.20000
AFIX   0
C8B   1    0.949878   -0.124034    0.148565    11.00000    0.05769    0.04907 =
         0.04676   -0.00980   -0.00397   -0.01544
AFIX  23
H8C   2    0.991719   -0.187433    0.106838    11.00000   -1.20000
H8D   2    0.968186   -0.164862    0.197043    11.00000   -1.20000
AFIX   0
C9B   1    0.760554   -0.078142    0.153114    11.00000    0.05190    0.04384 =
         0.06424   -0.01147   -0.02374   -0.00506
AFIX  23
H9C   2    0.704921   -0.150463    0.156182    11.00000   -1.20000
H9D   2    0.742565   -0.035771    0.105056    11.00000   -1.20000
AFIX   0
C10B  1    0.669764    0.011339    0.221304    11.00000    0.04047    0.04795 =
         0.04602    0.00339   -0.01977   -0.00374
AFIX  23
H10C  2    0.728598    0.081800    0.220220    11.00000   -1.20000
H10D  2    0.550345    0.044552    0.215201    11.00000   -1.20000
AFIX   0
C11B  1    0.667410   -0.048429    0.297487    11.00000    0.04139    0.04406 =
         0.05273    0.00199   -0.01129   -0.01227
AFIX  23
H11C  2    0.781187   -0.101714    0.297566    11.00000   -1.20000
H11D  2    0.582167   -0.102312    0.304223    11.00000   -1.20000
AFIX   0
C12B  1    0.624644    0.042520    0.365209    11.00000    0.04225    0.03552 =
         0.04791   -0.00498    0.00814   -0.00912
AFIX  23
H12C  2    0.598592   -0.002351    0.413095    11.00000   -1.20000
H12D  2    0.520887    0.104879    0.360664    11.00000   -1.20000
AFIX   0
C13B  1    0.605914    0.240086    0.487565    11.00000    0.04594    0.02721 =
         0.03603    0.00162    0.00008   -0.00862
C14B  1    0.542563    0.375157    0.502492    11.00000    0.02875    0.03042 =
         0.02658   -0.00435   -0.00020   -0.01025
C15B  1    0.607039    0.436321    0.439436    11.00000    0.02510    0.02733 =
         0.02805   -0.00352   -0.00046   -0.00651
C16B  1    0.719981    0.342229    0.382875    11.00000    0.02852    0.03267 =
         0.02973   -0.00321   -0.00354   -0.00751
C17B  1    0.432282    0.436035    0.566132    11.00000    0.04097    0.02947 =
         0.02571    0.00219   -0.00191   -0.01025
AFIX  43
H17B  2    0.387646    0.393891    0.609705    11.00000   -1.20000
AFIX   0
N1B   3    0.707476    0.226883    0.414341    11.00000    0.03809    0.02405 =
         0.02480   -0.00153    0.00350   -0.00737
O1B   4    0.576891    0.156596    0.529574    11.00000    0.08003    0.03064 =
         0.04269    0.00284    0.01627   -0.01028
O2B   4    0.806940    0.358825    0.322311    11.00000    0.04307    0.03752 =
         0.03014   -0.00153    0.00752   -0.00527
HKLF    4
 
REM  11s_sk36_pmdi12melt_0s in P-1
REM R1 =  0.0488 for   1928 Fo > 4sig(Fo)  and  0.1766 for all   5377 data
REM    361 parameters refined using      0 restraints
 
END
 
WGHT      0.0136      0.0000
REM Highest difference peak  0.219,  deepest hole -0.179,  1-sigma level  0.041
Q1    1   1.1395 -0.0219  0.3336  11.00000  0.05    0.22
Q2    1   1.1288 -0.1177  0.1627  11.00000  0.05    0.20
Q3    1   0.7367 -0.0792  0.2198  11.00000  0.05    0.17
Q4    1   1.0856  0.0206  0.0315  11.00000  0.05    0.16
Q5    1   0.7443  0.2000  0.5714  11.00000  0.05    0.15
;
