# Supplementary material
Source: publisher figshare collection journal article supplement (https://acs.figshare.com/ndownloader/files/4106071)
Supplement: Supplementary file 2 [file 4106071 › polyIII-11s_sk36_pmdi12melt_0s.fcf]

#
# h,k,l, Fc-squared, Fo-squared, sigma(Fo-squared) and status flag
#
data_polyIII_11s_sk36_pmdi12melt_0s
_shelx_title ' 11s_sk36_pmdi12melt_0s in P-1'
_shelx_refln_list_code          4
_shelx_F_calc_maximum      159.30
_exptl_crystal_F_000       596.00
_reflns_d_resolution_high  0.8409
 
loop_
 _symmetry_equiv_pos_as_xyz
 'x, y, z'
 '-x, -y, -z'
 
_cell_length_a     8.1128
_cell_length_b    11.0482
_cell_length_c    17.7882
_cell_angle_alpha  89.267
_cell_angle_beta   79.228
_cell_angle_gamma  78.377
 
_shelx_F_squared_multiplier     1.000
 
loop_
 _refln_index_h
 _refln_index_k
 _refln_index_l
 _refln_F_squared_calc
 _refln_F_squared_meas
 _refln_F_squared_sigma
 _refln_observed_status
   1   0   0      247.58      219.70      7.97 o
   2   0   0      146.35      175.79     11.70 o
   3   0   0      319.45      317.79     23.56 o
   4   0   0       14.28       25.26     26.33 o
   5   0   0      148.83      144.12     40.31 o
   6   0   0       18.83        4.39     35.47 o
   7   0   0       83.57      113.93     47.56 o
   9   0   0       21.72       39.23     48.19 o
  -8   1   0       23.42       31.35     46.94 o
  -7   1   0       93.24       58.94     43.98 o
  -6   1   0       44.89       65.75     39.32 o
  -5   1   0      119.01      120.65     40.13 o
  -4   1   0      238.80      234.51     21.81 o
  -3   1   0      255.63      252.83     17.14 o
  -2   1   0      795.60      745.12     19.27 o
  -1   1   0      211.82      222.52      9.20 o
   0   1   0     2208.36     2134.01     29.98 o
   1   1   0      659.01      651.06     17.57 o
   2   1   0    10112.00     9801.54    105.25 o
   3   1   0        4.33        1.29     10.65 o
   4   1   0        0.15       -8.60     22.21 o
   5   1   0        2.53       36.63     30.99 o
   6   1   0       30.86       73.00     40.84 o
   7   1   0        8.71       17.38     35.47 o
   8   1   0        0.75        4.66     38.07 o
   9   1   0        0.26       38.52     47.65 o
  -8   2   0       68.03       31.53     48.55 o
  -7   2   0       49.50       60.28     45.86 o
  -6   2   0       22.08       29.11     35.56 o
  -5   2   0        0.02      -15.71     15.71 o
  -4   2   0        3.08       -8.78     11.41 o
  -3   2   0      239.74      272.51     17.81 o
  -2   2   0       20.87       29.80      9.18 o
  -1   2   0     1721.91     1572.94     36.55 o
   0   2   0     7981.51     7734.65     65.13 o
   1   2   0     3058.22     3035.04     37.56 o
   2   2   0     1075.18     1112.10     33.31 o
   3   2   0      129.18      123.34     22.97 o
   6   2   0      142.48      183.71     49.26 o
   7   2   0      620.32      536.98     72.55 o
   8   2   0       51.90      111.34     51.06 o
   9   2   0        3.05       11.82     40.84 o
  -8   3   0       17.69        4.66     45.41 o
  -7   3   0       16.01      -20.96     37.08 o
  -6   3   0      250.92      251.64     30.48 o
  -5   3   0       36.71       53.57     21.19 o
  -4   3   0        0.60      -15.24     15.24 o
  -3   3   0      579.31      555.85     24.54 o
  -2   3   0       13.84       21.38      9.54 o
  -1   3   0        0.19       -0.27      6.15 o
   0   3   0     1058.85     1031.24     21.36 o
   1   3   0      549.89      572.38     23.29 o
   2   3   0     3740.47     3732.43     54.34 o
   3   3   0      994.66     1049.47     37.39 o
   4   3   0      414.74      390.71     43.98 o
   5   3   0       11.76       22.39     28.04 o
   6   3   0      951.16      842.24     76.58 o
   7   3   0        2.34       -8.42     32.25 o
   8   3   0        0.48        5.11     38.78 o
   9   3   0       40.98       64.76     51.50 o
  -8   4   0       30.97      -16.57     44.43 o
  -7   4   0       58.83       62.70     47.47 o
  -6   4   0       37.03       34.23     20.06 o
  -5   4   0      180.52      173.04     27.63 o
  -4   4   0       73.20       80.96     20.90 o
  -3   4   0      425.10      403.90     29.60 o
  -2   4   0      584.65      600.58     25.40 o
  -1   4   0       85.79       81.88     11.60 o
   0   4   0      111.65      109.84     11.34 o
   1   4   0      155.19      156.22     13.84 o
   2   4   0      777.28      796.63     28.84 o
   3   4   0      122.29      106.73     17.99 o
   4   4   0      259.26      264.77     37.62 o
   5   4   0        4.42      -15.14     26.24 o
   6   4   0       52.77       53.83     39.23 o
   7   4   0       49.13       28.13     39.23 o
   8   4   0      129.32      150.75     52.49 o
   9   4   0       63.71      115.46     54.19 o
  -7   5   0       22.67       55.00     46.85 o
  -6   5   0      126.09      153.44     51.77 o
  -5   5   0        3.84       -2.60     19.98 o
  -4   5   0     1027.85      985.63     47.56 o
  -3   5   0       60.21       51.01     19.36 o
  -2   5   0      434.96      438.49     30.65 o
  -1   5   0      422.41      444.69     43.53 o
   0   5   0       73.49       66.93     12.90 o
   1   5   0     1511.95     1544.02     37.47 o
   2   5   0       51.45       45.14     12.54 o
   3   5   0      418.37      397.52     40.04 o
   4   5   0      297.04      311.53     40.75 o
   5   5   0        2.30       38.34     32.96 o
   6   5   0       77.48       47.11     39.05 o
   7   5   0       10.46        7.97     35.65 o
   8   5   0       11.83        6.09     41.02 o
   9   5   0        7.90       42.19     44.34 o
  -7   6   0        0.01      -10.75     37.35 o
  -6   6   0       46.42       31.35     39.05 o
  -5   6   0      213.68      207.85     33.14 o
  -4   6   0        8.93        3.85     21.87 o
  -3   6   0      289.59      266.92     43.04 o
  -2   6   0       68.75       52.59     19.38 o
  -1   6   0      444.58      443.07     30.68 o
   0   6   0      159.19      154.93     17.21 o
   1   6   0     1505.11     1494.89     34.67 o
   2   6   0      193.47      176.34     17.24 o
   3   6   0       51.14       38.72     17.06 o
   4   6   0       30.32       26.87     30.10 o
   5   6   0        3.31       -0.09     34.66 o
   6   6   0       77.01       80.52     42.55 o
   7   6   0       57.13       21.86     36.99 o
   8   6   0       41.63       49.62     42.99 o
   9   6   0        8.38       32.87     46.67 o
  -6   7   0       22.78       58.67     43.62 o
  -5   7   0        7.69       15.14     38.34 o
  -4   7   0       10.52       -4.43     20.26 o
  -3   7   0      482.21      480.41     52.94 o
  -2   7   0       96.07       86.22     23.82 o
  -1   7   0       24.64       22.95     18.74 o
   0   7   0       39.20       28.25     15.58 o
   1   7   0       65.70       65.18     14.85 o
   2   7   0      786.84      779.39     42.95 o
   3   7   0      706.32      703.39     37.83 o
   4   7   0      263.47      291.27     34.97 o
   5   7   0      213.65      248.65     48.01 o
   6   7   0       46.91       14.15     35.20 o
   7   7   0        0.02       48.91     38.34 o
   8   7   0        4.05        4.84     37.98 o
  -6   8   0       18.62       85.90     49.71 o
  -5   8   0        6.83       30.45     37.26 o
  -4   8   0       10.59       11.94     26.96 o
  -3   8   0      443.35      459.75     40.59 o
  -2   8   0       33.73       37.34     22.76 o
  -1   8   0        5.06        8.64     20.25 o
   0   8   0        3.11       -8.14     19.22 o
   1   8   0       58.82       46.38     16.78 o
   2   8   0        5.82       11.88     15.00 o
   3   8   0      111.84      129.57     20.38 o
   4   8   0       75.70       45.37     28.75 o
   5   8   0        2.28       12.30     26.14 o
   6   8   0        2.63        0.04     25.49 o
   7   8   0       71.70       88.23     43.53 o
   8   8   0       80.39      132.83     49.26 o
  -5   9   0       34.24       11.91     36.54 o
  -4   9   0        0.35      -29.56     29.56 o
  -3   9   0       28.16       20.40     24.05 o
  -2   9   0        5.38       -5.22     19.89 o
  -1   9   0      196.34      178.16     39.90 o
   0   9   0       46.15       37.38     22.62 o
   1   9   0      242.45      258.33     24.03 o
   2   9   0        0.01        8.07     21.76 o
   3   9   0      212.28      245.94     34.04 o
   4   9   0       10.36      -16.40     26.48 o
   5   9   0       65.22       80.74     30.05 o
   6   9   0       25.90       50.50     30.36 o
   7   9   0       98.23       80.64     35.89 o
   8   9   0       36.63       73.09     55.18 o
  -4  10   0       12.41       26.07     36.72 o
  -3  10   0        0.90        6.94     23.95 o
  -2  10   0        1.72      -11.22     28.75 o
  -1  10   0        0.19       14.20     20.93 o
   0  10   0        8.73       -3.96     27.14 o
   1  10   0      209.40      232.33     30.72 o
   2  10   0        6.36       10.11     20.33 o
   3  10   0       18.27       -6.33     22.09 o
   4  10   0      137.90       55.62     44.88 o
   5  10   0       18.17       21.50     38.96 o
   6  10   0       72.07       24.90     47.29 o
   7  10   0       68.45       61.36     53.21 o
  -2  11   0        6.52       40.13     42.10 o
  -1  11   0        0.15       -4.39     39.95 o
   0  11   0       93.51       56.34     42.55 o
   1  11   0       24.20       12.36     42.73 o
   2  11   0       49.64       61.00     44.61 o
   3  11   0        0.11       -9.58     40.22 o
   4  11   0        0.00       13.70     46.76 o
   5  11   0        3.26       28.66     47.29 o
   6  11   0       35.44       25.17     46.85 o
  -2  12   0       52.92       76.05     47.38 o
  -1  12   0       43.15      104.71     49.71 o
   0  12   0        0.11      -10.93     40.04 o
   1  12   0       28.76      119.40     51.95 o
   2  12   0        4.11      -13.44     41.02 o
   3  12   0       59.88       86.44     55.44 o
   4  12   0       10.21       34.22     49.17 o
   5  12   0        0.07       48.28     49.26 o
   1  13   0        5.94       23.83     45.77 o
   2  13   0        9.42        1.70     44.25 o
   3  13   0       92.18      101.84     56.79 o
  -3 -13   1        1.13       18.00     50.16 o
  -2 -13   1      119.19      127.55     58.67 o
  -1 -13   1        0.11       15.59     42.37 o
  -5 -12   1        4.82       14.87     44.52 o
  -4 -12   1       21.44       55.53     49.71 o
  -3 -12   1       30.32      148.15     56.79 o
  -2 -12   1        1.74       -6.00     39.95 o
  -1 -12   1       67.75       18.27     44.52 o
   0 -12   1        5.55        8.78     40.93 o
   1 -12   1        7.24        9.23     40.04 o
   2 -12   1        0.25       12.54     39.77 o
  -6 -11   1        3.37       11.11     42.37 o
  -5 -11   1       13.31      -24.36     41.74 o
  -4 -11   1       13.20       33.59     44.07 o
  -3 -11   1      178.35      219.54     57.33 o
  -2 -11   1      590.68      629.50     81.06 o
  -1 -11   1      153.63      204.31     57.77 o
   0 -11   1       69.57      150.39     48.55 o
   1 -11   1       37.04       46.58     41.83 o
   2 -11   1        4.15      -33.50     34.04 o
  -7 -10   1      131.17      120.29     60.19 o
  -6 -10   1       17.49        6.90     44.16 o
  -5 -10   1        0.03       12.30     30.65 o
  -4 -10   1      133.63      108.08     32.95 o
  -3 -10   1        0.55      -20.53     20.53 o
  -2 -10   1        4.31        9.35     21.31 o
  -1 -10   1      103.29       91.89     39.86 o
   0 -10   1       77.71       42.31     22.46 o
   1 -10   1      193.37      196.71     31.13 o
   2 -10   1       11.92       20.89     22.32 o
   3 -10   1        9.49        0.09     21.68 o
   4 -10   1        9.66       -9.05     34.22 o
  -7  -9   1       65.81       48.78     33.90 o
  -6  -9   1        4.31      -12.47     26.88 o
  -5  -9   1       91.68      109.71     33.58 o
  -4  -9   1      163.35      169.67     34.44 o
  -3  -9   1       18.89        6.25     27.71 o
  -2  -9   1        0.00       12.74     23.01 o
  -1  -9   1      216.76      265.12     32.34 o
   0  -9   1        3.70       14.10     22.01 o
   1  -9   1      615.77      614.62     44.13 o
   2  -9   1       78.08       65.72     25.33 o
   3  -9   1       88.12       75.13     28.53 o
   4  -9   1       80.18       49.53     37.71 o
   5  -9   1       99.66      191.32     56.25 o
  -8  -8   1       20.34       47.92     46.58 o
  -7  -8   1       13.27       51.06     43.62 o
  -6  -8   1        2.89       -8.78     35.56 o
  -5  -8   1       78.13       29.11     40.75 o
  -4  -8   1        5.71       27.64     28.03 o
  -3  -8   1       13.39       32.50     24.82 o
  -2  -8   1      105.85      111.47     42.46 o
  -1  -8   1       31.19       36.88     21.84 o
   0  -8   1        2.22       14.80     19.87 o
   1  -8   1       12.53       -2.20     20.59 o
   2  -8   1       16.15        9.84     21.75 o
   3  -8   1      581.17      585.46     43.47 o
   4  -8   1       34.87       17.96     21.86 o
   5  -8   1        1.39       22.57     39.05 o
   6  -8   1        0.29      -35.11     35.11 o
  -8  -7   1       13.48       34.48     42.19 o
  -7  -7   1       95.97       96.29     47.56 o
  -6  -7   1        0.05      -31.53     31.53 o
  -5  -7   1       43.15       91.27     46.31 o
  -4  -7   1       79.63      101.22     38.16 o
  -3  -7   1       84.87      112.77     37.35 o
  -2  -7   1      771.57      782.01     39.70 o
  -1  -7   1      103.92      117.06     18.38 o
   0  -7   1       20.73        7.44     18.36 o
   1  -7   1        2.15        3.62     18.05 o
   2  -7   1        2.40       22.33     19.86 o
   3  -7   1       57.36       58.46     25.12 o
   4  -7   1      161.27      150.43     28.06 o
   5  -7   1      476.03      411.40     66.73 o
   6  -7   1       10.04       18.09     37.71 o
  -9  -6   1       21.05       39.77     43.62 o
  -8  -6   1        8.15       44.52     43.08 o
  -7  -6   1       67.32       75.60     41.83 o
  -6  -6   1       58.73       41.83     39.86 o
  -5  -6   1        1.51       -5.28     33.77 o
  -4  -6   1      114.07      127.73     38.34 o
  -3  -6   1      159.44      122.71     32.78 o
  -2  -6   1      935.77      972.86     48.44 o
  -1  -6   1      141.03      169.03     18.62 o
   0  -6   1      142.50      162.66     18.33 o
   1  -6   1       27.51       32.03     17.44 o
   2  -6   1      483.13      460.40     33.12 o
   3  -6   1        1.40        3.02     18.72 o
   4  -6   1        9.99        6.28     19.88 o
   5  -6   1       50.47       28.26     19.69 o
   6  -6   1       14.47      -22.12     32.87 o
   7  -6   1       74.12       37.17     45.95 o
  -9  -5   1        0.21       55.62     47.65 o
  -8  -5   1        0.95       -9.32     37.08 o
  -7  -5   1      136.53       94.23     43.71 o
  -6  -5   1        1.13        7.52     36.72 o
  -5  -5   1      248.03      251.69     46.31 o
  -4  -5   1      152.27      107.93     34.84 o
  -3  -5   1        5.87        8.07     17.24 o
  -2  -5   1      387.18      433.08     42.81 o
  -1  -5   1      358.90      362.75     21.81 o
   0  -5   1      911.82      980.47     29.98 o
   1  -5   1      434.49      438.31     24.74 o
   2  -5   1       10.92       -0.38     15.03 o
   3  -5   1       94.34      105.75     20.65 o
   4  -5   1        9.92       16.72     18.74 o
   5  -5   1      599.11      561.04     38.57 o
   6  -5   1       76.65       59.03     43.44 o
   7  -5   1       26.95       60.10     46.58 o
  -9  -4   1        2.90        8.24     41.47 o
  -8  -4   1        0.35       28.75     42.90 o
  -7  -4   1       22.34      -24.01     31.98 o
  -6  -4   1      262.71      295.32     56.52 o
  -5  -4   1       16.03       -9.32     28.93 o
  -4  -4   1        0.03      -21.23     21.23 o
  -3  -4   1      325.62      326.40     37.89 o
  -2  -4   1      941.32      980.75     35.13 o
  -1  -4   1      142.14      138.66     17.39 o
   0  -4   1     2201.63     2290.86     38.86 o
   1  -4   1      550.43      465.21    135.90 o
   2  -4   1       53.02       37.19     12.12 o
   3  -4   1       27.83       27.85     12.16 o
   4  -4   1        0.42       -1.41     12.73 o
   5  -4   1      110.81      102.43     22.52 o
   6  -4   1      107.96       96.69     28.21 o
   7  -4   1        1.37       -1.79     37.71 o
   8  -4   1      148.95      164.99     60.55 o
  -9  -3   1       25.27       -1.97     42.10 o
  -8  -3   1       31.49       19.71     41.83 o
  -7  -3   1        1.50       -1.97     36.01 o
  -6  -3   1      179.91      151.82     45.86 o
  -5  -3   1      326.27      283.85     47.29 o
  -4  -3   1     1085.26     1074.22     66.10 o
  -3  -3   1      228.02      226.26     22.69 o
  -2  -3   1       29.56       10.41      9.32 o
  -1  -3   1       81.90       80.62     16.47 o
   0  -3   1      434.04      448.77     23.68 o
   1  -3   1        4.49        1.56      8.33 o
   2  -3   1        1.18        9.41      8.38 o
   3  -3   1      367.51      359.41     19.17 o
   4  -3   1      291.84      272.70     19.31 o
   5  -3   1      209.87      182.77     24.69 o
   6  -3   1        4.96       14.33     35.74 o
   7  -3   1      147.00      126.03     50.88 o
   8  -3   1       84.61      148.96     60.64 o
  -9  -2   1        7.34        4.84     44.43 o
  -8  -2   1       49.16       32.51     43.44 o
  -7  -2   1      121.22       99.96     47.74 o
  -6  -2   1       41.56       42.73     38.78 o
  -5  -2   1        2.21       13.70     30.10 o
  -4  -2   1        2.89       -8.69     23.56 o
  -3  -2   1      244.17      279.54     24.57 o
  -2  -2   1    11405.35    11601.97    155.41 o
  -1  -2   1      191.76       44.03     82.54 o
   0  -2   1     5013.33     2884.99   2409.37 o
   1  -2   1       80.90       67.65      9.42 o
   2  -2   1     1523.88     1498.88     23.70 o
   3  -2   1     1105.96     1120.85     26.08 o
   4  -2   1      367.83      397.16     20.91 o
   5  -2   1      262.69      233.86     43.13 o
   6  -2   1        0.09      -18.18     32.07 o
   7  -2   1       11.86      -30.36     34.13 o
   8  -2   1       56.71       41.20     47.02 o
  -9  -1   1        0.56       17.91     47.56 o
  -8  -1   1       21.99       21.77     42.55 o
  -7  -1   1       87.38       49.89     41.92 o
  -6  -1   1       53.91       16.12     38.07 o
  -4  -1   1       31.65       62.25     29.56 o
  -2  -1   1      783.54      711.76     25.19 o
  -1  -1   1     4846.34     4505.69     49.81 o
   0  -1   1     3421.51     3236.07     36.53 o
   1  -1   1     3222.02     3126.38     57.44 o
   2  -1   1     1410.41     1352.06     29.67 o
   3  -1   1      335.71      337.78     16.78 o
   4  -1   1      139.44      133.66     20.10 o
   5  -1   1        1.00       15.76     28.84 o
   6  -1   1       91.42      110.98     44.25 o
   7  -1   1       27.27       13.70     38.07 o
   8  -1   1        0.24        9.23     43.08 o
   9  -1   1        3.13       29.02     52.22 o
  -9   0   1        1.78        1.52     47.02 o
  -8   0   1        0.57        7.08     41.92 o
  -6   0   1       48.29       99.87     42.19 o
  -5   0   1      120.61      116.98     37.62 o
  -4   0   1      102.19      104.06     19.77 o
  -3   0   1       31.49       17.06     11.22 o
  -2   0   1     3498.26     3328.75     38.20 o
  -1   0   1        7.54        6.00      6.29 o
   1   0   1      321.58      300.46     13.65 o
   2   0   1    10298.56    10277.33    146.10 o
   3   0   1        0.36       -5.18      9.86 o
   4   0   1      108.84       94.79     18.52 o
   5   0   1       22.39       31.80     31.44 o
   6   0   1       28.04       69.87     40.40 o
   7   0   1      108.36      141.70     50.88 o
   8   0   1       14.22       31.17     41.56 o
  -9   1   1        6.42        4.39     44.96 o
  -7   1   1        7.63       39.41     37.26 o
  -6   1   1        0.08       -8.24     34.22 o
  -5   1   1      691.12      638.02     40.53 o
  -4   1   1      193.30      204.47     23.58 o
  -3   1   1      261.10      292.42     19.82 o
  -2   1   1     1284.29     1318.52     25.83 o
  -1   1   1      788.44      830.16     16.53 o
   0   1   1      341.79      311.21      7.21 o
   1   1   1     2476.32     2349.12     25.88 o
   2   1   1     3972.28     4137.50     56.81 o
   3   1   1       58.10       58.75     16.28 o
   4   1   1     5883.20     5511.75    135.07 o
   5   1   1        5.64       -0.27     27.14 o
   6   1   1        0.18      -18.45     31.44 o
   7   1   1      184.44      193.29     54.91 o
   8   1   1      174.98      171.35     57.59 o
   9   1   1       13.84       28.84     46.22 o
  -8   2   1       18.67      -12.72     42.81 o
  -7   2   1       32.42        1.97     38.34 o
  -6   2   1       63.59       84.58     25.61 o
  -5   2   1        2.86       -0.32     17.43 o
  -4   2   1      103.77       96.66     23.33 o
  -3   2   1       55.38       54.00     13.45 o
  -2   2   1      180.96      196.15     14.65 o
  -1   2   1     1245.93     1010.44    244.73 o
   0   2   1       35.09       40.93      5.92 o
   1   2   1     3641.96     3488.98     34.28 o
   2   2   1    10511.91    10469.60    229.30 o
   3   2   1      155.44      155.61     18.81 o
   4   2   1       68.23       32.16     26.42 o
   5   2   1       38.42       35.65     30.63 o
   6   2   1      298.74      357.84     56.52 o
   7   2   1        2.04       21.23     36.99 o
   8   2   1        5.95        4.03     37.89 o
   9   2   1        8.58       46.94     45.05 o
  -8   3   1        0.00       10.39     43.62 o
  -7   3   1      154.19      127.73     53.29 o
  -6   3   1       26.88       51.75     22.45 o
  -5   3   1      268.77      283.48     31.05 o
  -4   3   1       28.70       25.99     17.48 o
  -3   3   1       14.39        9.26     14.71 o
  -2   3   1      116.50      133.55     13.25 o
  -1   3   1     4519.54     4449.54     66.26 o
   0   3   1        1.10       -0.48      7.74 o
   1   3   1      687.52      668.32     17.28 o
   2   3   1       81.92       83.11     12.98 o
   3   3   1     1688.95     1680.44     43.89 o
   4   3   1        2.07        0.72     20.42 o
   5   3   1      121.49      140.63     35.20 o
   6   3   1       82.21       72.19     37.71 o
   7   3   1       10.12       30.36     39.68 o
   8   3   1        6.40       -1.25     36.46 o
   9   3   1       12.07       24.45     39.59 o
  -8   4   1       14.92       -3.13     44.43 o
  -7   4   1      152.95      136.77     56.43 o
  -6   4   1       11.50       11.71     19.77 o
  -5   4   1       65.45       67.33     24.31 o
  -4   4   1        0.08       -1.02     23.87 o
  -3   4   1      722.25      708.88     37.76 o
  -2   4   1      621.15      678.04     34.49 o
  -1   4   1      950.88     1010.68     28.30 o
   0   4   1      871.33      848.82     22.42 o
   1   4   1      204.15      184.79     13.26 o
   2   4   1     1465.45     1455.57     74.03 o
   3   4   1      424.54      436.01     26.22 o
   4   4   1     2826.82     2889.83     93.51 o
   5   4   1       36.31       26.60     29.11 o
   6   4   1      466.47      400.83     56.79 o
   7   4   1        3.34       43.53     37.80 o
   8   4   1        0.42       14.87     37.62 o
   9   4   1       81.82       81.78     50.43 o
  -7   5   1      111.47      106.14     54.37 o
  -6   5   1      450.95      375.77     79.99 o
  -5   5   1      192.28      168.15     29.83 o
  -4   5   1      228.19      217.54     29.79 o
  -3   5   1        4.51       13.43     19.42 o
  -2   5   1      411.51      429.96     31.18 o
  -1   5   1     1227.47     1196.10     33.12 o
   0   5   1       46.81       76.62     15.82 o
   1   5   1      105.91      132.07     12.25 o
   2   5   1      367.38      351.41     19.18 o
   3   5   1       86.36       80.60     14.22 o
   4   5   1       81.80       86.08     28.04 o
   5   5   1       59.63       21.23     29.83 o
   6   5   1        4.74      -29.02     29.02 o
   7   5   1        2.08       28.66     36.72 o
   8   5   1        5.17       12.27     35.83 o
   9   5   1        2.47       23.02     40.49 o
  -7   6   1        0.38      -23.92     40.67 o
  -6   6   1      110.81      131.67     54.01 o
  -5   6   1       21.03       38.88     28.44 o
  -4   6   1        7.49        4.05     21.52 o
  -3   6   1      135.37      153.08     26.62 o
  -2   6   1      149.61      149.16     24.69 o
  -1   6   1      167.55      186.20     19.19 o
   0   6   1       82.95       78.97     13.72 o
   1   6   1      294.94      310.24     37.99 o
   2   6   1      278.07      288.67     24.32 o
   3   6   1        1.89       -4.99     11.69 o
   4   6   1       14.16       28.46     21.08 o
   5   6   1       68.79       57.68     34.66 o
   6   6   1        5.17       24.90     37.17 o
   7   6   1        4.54       -3.40     32.42 o
   8   6   1       10.89       30.19     36.90 o
   9   6   1       58.82       76.22     48.82 o
  -6   7   1        9.66       29.92     41.20 o
  -5   7   1       34.87       39.27     24.16 o
  -4   7   1       47.34       13.12     22.71 o
  -3   7   1        0.89       -0.75     25.30 o
  -2   7   1      453.86      447.53     36.88 o
  -1   7   1       21.38       14.82     18.09 o
   0   7   1        4.98       -4.06     12.65 o
   1   7   1        0.01        6.12     11.83 o
   2   7   1       27.81       38.40     12.50 o
   3   7   1        3.81       10.47     13.74 o
   4   7   1       23.60        8.93     32.02 o
   5   7   1       42.67       54.15     28.02 o
   6   7   1      107.22      102.46     30.85 o
   7   7   1        6.29        9.23     34.13 o
   8   7   1        0.04       25.15     28.55 o
  -6   8   1       24.22       22.12     44.34 o
  -5   8   1       84.81       66.19     46.22 o
  -4   8   1        8.33       -9.09     22.15 o
  -3   8   1      632.85      629.25     45.97 o
  -2   8   1       23.05       14.21     22.00 o
  -1   8   1      134.10      139.82     25.57 o
   0   8   1      296.71      297.25     24.21 o
   1   8   1      884.29      915.66     32.41 o
   2   8   1        7.99       17.49     13.01 o
   3   8   1        0.46       21.15     22.66 o
   4   8   1       94.88       89.56     32.51 o
   5   8   1       23.59       22.14     28.13 o
   6   8   1       15.54        7.02     25.56 o
   7   8   1       19.38       14.39     27.21 o
   8   8   1       50.33      106.08     35.54 o
  -5   9   1      137.63      156.93     54.37 o
  -4   9   1       25.53        8.67     24.06 o
  -3   9   1        1.60       -6.24     22.26 o
  -2   9   1       32.51       18.90     28.80 o
  -1   9   1        0.06       10.93     20.71 o
   0   9   1      161.45      169.92     26.75 o
   1   9   1        0.51        7.40     17.57 o
   2   9   1      767.26      788.59     40.23 o
   3   9   1      574.27      607.80     41.76 o
   4   9   1       48.70       68.17     27.89 o
   5   9   1       72.34      107.02     31.30 o
   6   9   1       48.67       61.21     29.52 o
   7   9   1        0.01      -18.90     41.92 o
   8   9   1        9.48       31.89     49.80 o
  -4  10   1        3.67       39.95     40.31 o
  -3  10   1        1.28       21.65     24.52 o
  -2  10   1      235.06      263.82     35.68 o
  -1  10   1       45.73       15.04     21.93 o
   0  10   1       57.52       45.21     21.28 o
   1  10   1      188.32      210.76     54.19 o
   2  10   1       75.07       40.58     42.28 o
   3  10   1       13.64       38.78     42.81 o
   4  10   1      383.42      550.14     78.20 o
   5  10   1      149.18      175.11     58.22 o
   6  10   1        9.90       19.62     45.23 o
   7  10   1       17.03       36.72     47.92 o
  -2  11   1        6.21       20.33     40.13 o
  -1  11   1       62.64       91.00     48.55 o
   0  11   1        0.28      -18.27     36.37 o
   1  11   1      222.02      251.78     58.85 o
   2  11   1        2.06        9.49     42.19 o
   3  11   1        0.27        8.06     41.02 o
   4  11   1       68.31      117.43     55.89 o
   5  11   1       10.36      -24.72     40.84 o
   6  11   1       61.29      103.90     56.79 o
  -1  12   1       17.91       17.02     45.32 o
   0  12   1        0.47        6.81     41.56 o
   1  12   1       39.21       36.81     45.59 o
   2  12   1       60.24       59.92     49.62 o
   3  12   1        0.04      -25.71     40.93 o
   4  12   1        0.87      -17.65     42.28 o
   5  12   1        0.62       35.92     49.98 o
   1  13   1        1.16        2.06     39.32 o
   2  13   1        0.55        0.90     44.96 o
   3  13   1       32.76       89.84     57.41 o
  -2 -13   2       25.76       10.12     49.44 o
  -1 -13   2        8.15       37.71     47.83 o
  -5 -12   2       29.98      106.32     56.79 o
  -4 -12   2       46.12       15.23     44.52 o
  -3 -12   2        6.42        3.76     42.01 o
  -2 -12   2       14.04       60.73     50.43 o
  -1 -12   2      281.14      316.90     66.46 o
   0 -12   2       35.26       52.85     46.04 o
   1 -12   2       15.83        2.15     38.43 o
  -6 -11   2        4.56       90.65     54.19 o
  -5 -11   2       11.59       46.67     49.53 o
  -4 -11   2      114.41      141.61     56.07 o
  -3 -11   2       50.01       65.92     48.10 o
  -2 -11   2       24.50       19.53     43.44 o
  -1 -11   2        4.35       17.11     42.64 o
   0 -11   2      161.28      151.89     37.89 o
   1 -11   2        0.00       19.68     24.40 o
   2 -11   2       11.01       11.45     25.69 o
   3 -11   2       22.79       13.44     34.84 o
  -7 -10   2       51.93       -8.96     41.74 o
  -6 -10   2       67.45       77.06     37.34 o
  -5 -10   2        4.39       14.98     36.19 o
  -4 -10   2       61.72       78.62     32.15 o
  -3 -10   2       88.60       63.72     29.03 o
  -2 -10   2       45.59       37.76     29.92 o
  -1 -10   2       54.21       83.75     27.72 o
   0 -10   2      444.40      470.94     51.06 o
   1 -10   2      187.41      174.94     30.07 o
   2 -10   2       43.11       45.13     26.56 o
   3 -10   2      129.16      110.35     43.53 o
   4 -10   2        0.21       14.60     36.90 o
  -7  -9   2        0.91      -42.90     42.90 o
  -6  -9   2       24.55       19.26     43.80 o
  -5  -9   2       17.71       49.53     43.80 o
  -4  -9   2       32.76       28.33     28.80 o
  -3  -9   2        1.99        2.42     25.27 o
  -2  -9   2      511.71      612.46     94.72 o
  -1  -9   2       47.55       29.05     24.51 o
   0  -9   2       11.74        8.57     23.09 o
   1  -9   2      157.24      142.03     28.52 o
   2  -9   2       17.49       10.48     21.99 o
   3  -9   2       49.36       59.27     25.10 o
   4  -9   2       23.39       22.93     33.95 o
   5  -9   2        3.75       38.87     40.67 o
  -8  -8   2       30.39       52.58     47.29 o
  -7  -8   2       15.26       35.02     45.14 o
  -6  -8   2        0.79      -15.94     38.07 o
  -5  -8   2        3.17       26.69     39.95 o
  -4  -8   2       80.19       86.70     43.89 o
  -3  -8   2       11.02       -5.56     25.61 o
  -2  -8   2       28.44       11.56     24.71 o
  -1  -8   2      101.85      115.53     26.57 o
   0  -8   2      153.10      152.72     27.72 o
   1  -8   2       25.38       25.59     22.77 o
   2  -8   2      327.97      354.04     35.80 o
   3  -8   2      342.52      354.88     35.93 o
   4  -8   2        0.73       -5.64     29.20 o
   5  -8   2       25.21       31.44     37.17 o
   6  -8   2        9.04      -25.35     37.71 o
  -8  -7   2        0.11       24.63     43.26 o
  -7  -7   2        1.41       -8.69     35.92 o
  -6  -7   2        0.46       32.42     39.86 o
  -5  -7   2      189.28      164.45     51.50 o
  -4  -7   2       14.34      -15.50     35.20 o
  -3  -7   2      205.18      212.37     46.49 o
  -2  -7   2        2.62       41.33     22.86 o
  -1  -7   2        7.85      -10.21     18.76 o
   0  -7   2      414.91      408.23     33.84 o
   1  -7   2      271.75      286.51     30.42 o
   2  -7   2       64.64       69.23     22.57 o
   3  -7   2     1051.96      994.64     49.73 o
   4  -7   2      182.92      167.52     27.29 o
   5  -7   2      220.07      188.10     50.79 o
   6  -7   2        3.11       -0.72     36.72 o
  -8  -6   2        0.05       11.55     39.50 o
  -7  -6   2        3.50       62.07     42.99 o
  -6  -6   2        2.02       12.27     38.69 o
  -5  -6   2        0.90      -19.97     37.53 o
  -4  -6   2       12.35      -21.50     33.23 o
  -3  -6   2      208.26      140.81     37.62 o
  -2  -6   2      376.35      386.52     30.24 o
  -1  -6   2      233.41      228.71     21.18 o
   0  -6   2     1477.98     1487.89     40.22 o
   1  -6   2      357.18      396.03     30.78 o
   2  -6   2      243.29      255.59     26.89 o
   3  -6   2       57.80       67.68     21.97 o
   4  -6   2       98.35      117.36     24.13 o
   5  -6   2      101.08      143.04     46.49 o
   6  -6   2        1.81      -28.93     30.01 o
   7  -6   2       12.62       14.96     40.67 o
  -9  -5   2        0.00       45.23     48.82 o
  -8  -5   2        7.24       -1.25     40.58 o
  -7  -5   2       56.03       38.87     40.93 o
  -6  -5   2        5.16       33.14     40.13 o
  -5  -5   2      290.23      290.75     54.01 o
  -4  -5   2     1444.11     1445.59     80.97 o
  -3  -5   2      428.23      426.27     48.46 o
  -2  -5   2       15.22       24.53     16.73 o
  -1  -5   2      143.80      166.77     26.92 o
   0  -5   2     1084.12     1118.81     33.36 o
   1  -5   2       25.02       25.67     15.63 o
   2  -5   2       97.44      131.25     24.23 o
   3  -5   2       33.94       29.53     13.79 o
   4  -5   2       48.09       39.87     14.73 o
   5  -5   2      127.02      100.36     21.45 o
   6  -5   2      244.83      254.83     58.67 o
   7  -5   2       11.51       18.90     41.83 o
  -9  -4   2       10.53       85.27     50.70 o
  -8  -4   2        8.18       25.44     44.70 o
  -7  -4   2       23.17       35.02     38.96 o
  -6  -4   2       95.21       76.85     43.17 o
  -5  -4   2      111.86      128.18     43.53 o
  -4  -4   2     1268.61     1142.30     71.21 o
  -3  -4   2     1841.33     1808.53     76.14 o
  -2  -4   2        8.97        3.13     23.02 o
  -1  -4   2      187.94      188.81     22.17 o
   0  -4   2     1124.27     1102.89     52.22 o
   1  -4   2        0.21       -3.20     11.09 o
   2  -4   2      346.91      352.75     19.58 o
   3  -4   2      188.18      180.99     16.82 o
   4  -4   2     1423.35     1447.13     37.35 o
   5  -4   2       33.31       29.81     13.03 o
   6  -4   2        2.66        4.39     35.92 o
   7  -4   2       14.82       26.42     40.67 o
   8  -4   2        6.05       36.54     48.01 o
  -9  -3   2       20.20       44.96     50.97 o
  -8  -3   2       28.89       31.26     45.95 o
  -7  -3   2      132.28      173.59     50.79 o
  -6  -3   2       38.14       29.38     38.69 o
  -5  -3   2       60.40       43.62     35.02 o
  -4  -3   2      585.34      535.99     54.19 o
  -3  -3   2      371.74      341.80     41.65 o
  -2  -3   2     2554.68     2484.05     53.55 o
  -1  -3   2      117.24       55.38     43.35 o
   0  -3   2     2903.50     2880.60     71.66 o
   1  -3   2       20.99       19.75     10.47 o
   2  -3   2       10.97       -0.69      8.32 o
   3  -3   2       45.45       40.57     13.68 o
   4  -3   2       88.58       93.43     12.54 o
   5  -3   2      244.28      267.35     19.39 o
   6  -3   2        0.43       14.42     35.74 o
   7  -3   2       26.94       23.02     39.68 o
   8  -3   2       52.26        7.17     44.16 o
  -9  -2   2       12.91       60.73     52.49 o
  -8  -2   2       22.01       73.81     50.52 o
  -7  -2   2        5.66        1.34     37.35 o
  -6  -2   2       41.70       65.57     43.53 o
  -5  -2   2       68.22       67.72     35.20 o
  -4  -2   2       37.66       35.83     28.57 o
  -3  -2   2     2125.60     2034.42     79.09 o
  -2  -2   2      141.71      171.43     16.94 o
  -1  -2   2      472.42      443.86     27.84 o
   0  -2   2    25376.59    23508.08    549.07 o
   1  -2   2      951.22      879.70     24.12 o
   2  -2   2      295.83      306.41     11.65 o
   3  -2   2     1867.08     1703.85     27.37 o
   4  -2   2      136.07      135.22     12.74 o
   5  -2   2       78.80      113.65     21.46 o
   6  -2   2        1.38        7.79     35.29 o
   7  -2   2      173.25      130.33     50.97 o
   8  -2   2       10.11       -3.94     40.67 o
   9  -2   2       25.45       -9.76     47.38 o
  -9  -1   2        1.54       10.84     41.56 o
  -8  -1   2        2.22        4.39     41.56 o
  -7  -1   2       72.77       89.03     46.85 o
  -6  -1   2       36.88       39.59     39.95 o
  -5  -1   2      188.43      154.51     41.83 o
  -4  -1   2      189.21      248.83     41.02 o
  -3  -1   2       33.89       38.03     16.79 o
  -2  -1   2      174.96      157.62     13.86 o
  -1  -1   2       51.09       68.13      8.90 o
   0  -1   2     2878.26     2664.48     29.88 o
   1  -1   2      444.35      426.89     21.00 o
   2  -1   2    11066.34    11054.16    346.64 o
   3  -1   2      223.90      224.08     17.78 o
   4  -1   2       88.81       75.81     16.17 o
   5  -1   2       71.33       73.35     25.66 o
   6  -1   2       35.40       38.25     37.44 o
   7  -1   2       97.45       95.75     45.41 o
   8  -1   2        1.63        7.43     42.01 o
   9  -1   2       72.13        4.12     48.73 o
  -9   0   2        0.00       19.53     47.20 o
  -8   0   2       33.21       19.53     45.86 o
  -7   0   2       11.31       32.69     40.67 o
  -6   0   2      234.31      197.68     52.04 o
  -5   0   2        1.15        8.42     25.35 o
  -4   0   2      251.62      209.24     33.14 o
  -3   0   2       56.41       72.46     22.75 o
  -2   0   2     2798.62     2848.56     44.67 o
  -1   0   2      384.21      402.32     14.02 o
   0   0   2       31.74       37.13      4.82 o
   1   0   2     6103.74     5792.17     40.12 o
   2   0   2     1689.43     1691.38    109.32 o
   3   0   2        0.00       -6.05      9.52 o
   4   0   2      368.94      359.94     26.28 o
   5   0   2      140.54      157.20     38.25 o
   6   0   2      672.35      706.00     74.88 o
   7   0   2      343.54      351.57     63.24 o
   8   0   2       22.32       80.26     47.38 o
   9   0   2       20.87       50.16     50.79 o
  -8   1   2      142.85      123.34     57.33 o
  -7   1   2      129.40      118.05     51.95 o
  -6   1   2      132.15      107.13     31.84 o
  -5   1   2       91.29       95.36     36.99 o
  -4   1   2       85.34       76.58     20.44 o
  -3   1   2      169.04      163.47     21.57 o
  -2   1   2       92.47      108.59     12.39 o
  -1   1   2       60.04       61.28      9.47 o
   0   1   2       21.18       18.81      4.79 o
   1   1   2       37.12       39.30      5.73 o
   2   1   2     4673.93     4638.65     84.71 o
   3   1   2        2.17       -2.29     12.65 o
   4   1   2      571.43      622.74     32.62 o
   5   1   2       16.11       24.72     28.93 o
   6   1   2      354.87      355.51     57.06 o
   7   1   2        3.36       10.30     38.61 o
   8   1   2        1.89      -33.32     33.32 o
   9   1   2       66.11       17.38     49.80 o
  -8   2   2        5.28       36.81     46.40 o
  -6   2   2        7.74        0.65     21.22 o
  -5   2   2       34.48       11.61     20.11 o
  -4   2   2      196.82      199.81     25.97 o
  -3   2   2      236.78      267.38     30.72 o
  -2   2   2      453.67      433.62     19.28 o
  -1   2   2     3150.74     3031.40     41.39 o
   0   2   2     1923.42     1830.50     37.63 o
   1   2   2    10559.50    10299.34    148.55 o
   2   2   2    10111.99    10297.31     82.18 o
   3   2   2      884.95      896.02     51.64 o
   4   2   2      152.49      136.15     30.99 o
   5   2   2       77.06       40.04     29.38 o
   6   2   2      577.66      608.28     68.43 o
   7   2   2        2.39       -2.42     34.22 o
   8   2   2      312.28      364.64     69.87 o
   9   2   2        3.60       25.80     43.71 o
  -8   3   2        4.91        3.49     45.86 o
  -7   3   2      130.35      140.57     30.37 o
  -6   3   2      110.17      121.90     28.38 o
  -5   3   2        5.96        8.71     21.49 o
  -4   3   2       96.30      113.05     23.48 o
  -3   3   2      454.43      424.72     31.47 o
  -2   3   2      127.24      119.36     15.12 o
  -1   3   2     3621.09     3548.81     40.78 o
   0   3   2      842.13      868.93     17.77 o
   1   3   2      437.73      395.46     29.19 o
   2   3   2     1756.68     1737.24     28.89 o
   3   3   2     4260.45     4214.60    112.37 o
   4   3   2       98.99      130.59     30.72 o
   5   3   2       57.54       83.66     32.16 o
   6   3   2       62.40       74.52     40.84 o
   8   3   2        2.66        0.54     33.77 o
   9   3   2        0.03       -6.54     39.41 o
  -7   4   2       22.55       44.25     46.22 o
  -6   4   2       32.18       55.53     25.71 o
  -5   4   2      344.98      355.81     57.46 o
  -4   4   2       13.98       43.55     22.05 o
  -3   4   2      475.29      513.80     34.87 o
  -2   4   2      804.22      845.93     38.47 o
  -1   4   2      217.15      226.06     16.61 o
   0   4   2     1433.24     1405.10     25.65 o
   1   4   2      241.24      227.15     34.40 o
   2   4   2      233.59      226.69     21.23 o
   3   4   2      247.25      228.26     17.12 o
   4   4   2      102.55       92.53     26.87 o
   5   4   2       94.96       72.02     32.07 o
   6   4   2     1025.49     1095.81     79.90 o
   7   4   2       24.93       50.88     37.89 o
   8   4   2        0.03      -27.77     31.98 o
   9   4   2       13.98       -5.20     38.25 o
  -7   5   2        6.19      -20.24     33.23 o
  -6   5   2      227.67      255.97     35.08 o
  -5   5   2        0.06       -5.05     21.71 o
  -4   5   2       20.63       30.67     22.01 o
  -3   5   2       17.53       26.76     19.95 o
  -2   5   2       28.08       43.49     18.25 o
  -1   5   2        0.54       -1.93     11.11 o
   0   5   2     2741.12     2848.33     39.67 o
   1   5   2        7.78       11.10      6.84 o
   2   5   2      871.50      938.38     21.88 o
   3   5   2      671.77      703.70     25.63 o
   4   5   2      125.01      148.97     18.57 o
   5   5   2      122.10      125.76     34.84 o
   6   5   2        0.01       13.97     31.44 o
   7   5   2       51.03       96.74     39.14 o
   8   5   2       53.60       12.81     36.37 o
   9   5   2        0.00        4.12     36.19 o
  -7   6   2        3.08       25.08     45.41 o
  -6   6   2       65.50       47.92     44.79 o
  -5   6   2       81.04       77.60     30.14 o
  -4   6   2      148.76      154.81     30.21 o
  -3   6   2      121.10      129.34     27.53 o
  -2   6   2      527.04      534.62     37.77 o
  -1   6   2      711.41      714.43     29.15 o
   0   6   2      132.18      168.10     15.76 o
   1   6   2      136.40      162.13     14.49 o
   2   6   2     1083.24     1077.08     53.74 o
   3   6   2       92.76       84.82     13.74 o
   4   6   2       33.11       28.33     15.30 o
   5   6   2       43.53       56.74     25.51 o
   6   6   2      363.65      372.81     40.75 o
   7   6   2       81.45       73.84     30.86 o
   8   6   2        0.92        1.69     24.44 o
   9   6   2        6.81       40.82     29.04 o
  -6   7   2       31.47       46.67     44.43 o
  -5   7   2        1.87       21.17     24.36 o
  -4   7   2      264.63      251.61     33.80 o
  -3   7   2       32.03       29.47     24.48 o
  -2   7   2       28.15       20.52     21.08 o
  -1   7   2      111.40      107.67     23.22 o
   0   7   2      633.98      624.31     26.57 o
   1   7   2       11.39        7.23      9.55 o
   2   7   2       31.11       33.11      9.55 o
   3   7   2      162.99      156.59     16.97 o
   4   7   2        9.04        5.70     15.45 o
   5   7   2      194.10      181.31     32.31 o
   6   7   2        0.29       40.84     33.05 o
   7   7   2        0.99       -2.01     25.44 o
   8   7   2        0.36        6.52     26.52 o
   9   7   2      127.41      157.55     39.80 o
  -5   8   2       13.71       44.34     42.64 o
  -4   8   2       21.34        1.20     24.00 o
  -3   8   2       79.11       59.42     24.98 o
  -2   8   2       23.18       55.50     24.64 o
  -1   8   2        0.03       12.89     20.05 o
   0   8   2       38.71       43.71     15.67 o
   1   8   2       13.83       31.07     12.00 o
   2   8   2       50.10       65.67     11.63 o
   3   8   2      224.14      237.84     19.42 o
   4   8   2       32.41       14.81     16.63 o
   5   8   2       37.48       29.02     27.05 o
   6   8   2        2.95        1.62     24.82 o
   7   8   2       27.37       59.12     29.93 o
   8   8   2        1.49       -5.73     27.15 o
  -5   9   2       27.75       34.22     43.89 o
  -4   9   2        5.00      -23.08     23.08 o
  -3   9   2       40.40       14.00     31.13 o
  -2   9   2      160.14      157.23     29.25 o
  -1   9   2      730.39      708.63     43.93 o
   0   9   2      242.39      260.82     28.52 o
   1   9   2        2.59       16.47     15.82 o
   2   9   2       56.95       34.22     43.62 o
   3   9   2        0.16      -17.22     17.22 o
   4   9   2       74.80       77.18     25.77 o
   5   9   2       47.59       65.05     27.49 o
   6   9   2        0.88      -29.83     38.34 o
   7   9   2       20.85       34.57     46.76 o
   8   9   2       16.08       51.77     50.70 o
  -4  10   2       18.28       48.28     41.11 o
  -3  10   2        1.25      -22.74     22.74 o
  -2  10   2       21.29       15.31     24.21 o
  -1  10   2      290.61      305.69     34.02 o
   0  10   2       61.07       56.16     42.81 o
   1  10   2       95.66       65.57     44.61 o
   2  10   2      165.27      221.60     56.43 o
   3  10   2       49.69       80.26     47.47 o
   4  10   2        1.22       14.69     38.78 o
   5  10   2       49.05       88.23     47.92 o
   6  10   2      117.31       87.60     52.49 o
   7  10   2       66.40       29.38     46.49 o
  -3  11   2        2.99      -18.54     39.05 o
  -2  11   2       25.94       29.02     42.81 o
  -1  11   2       14.65      -17.74     41.11 o
   0  11   2       73.21       35.74     44.79 o
   1  11   2       30.00       33.95     45.05 o
   2  11   2       44.59       49.62     45.95 o
   3  11   2       28.44       54.19     48.28 o
   4  11   2       58.83        4.30     44.52 o
   5  11   2       20.09       21.23     46.85 o
   6  11   2       13.64       33.86     51.41 o
  -1  12   2        6.54        8.51     45.77 o
   0  12   2        2.48       -7.70     40.58 o
   1  12   2        3.35      -19.80     42.81 o
   2  12   2       41.66      107.22     54.19 o
   3  12   2       19.59       55.98     49.62 o
   4  12   2       18.67       25.35     49.35 o
   5  12   2       44.62       25.26     47.20 o
   1  13   2       44.97      100.41     54.64 o
   2  13   2        0.41      -16.39     47.56 o
   3  13   2        9.71       -7.52     47.47 o
  -5 -12   3        0.01       11.73     44.88 o
  -4 -12   3       22.15        1.61     42.99 o
  -3 -12   3       36.03      -26.96     40.84 o
  -2 -12   3        5.39       28.39     43.53 o
  -1 -12   3      141.69      191.95     57.86 o
   0 -12   3        1.53      -33.41     33.41 o
   1 -12   3        0.02       29.83     40.49 o
  -6 -11   3        6.15        6.36     45.77 o
  -5 -11   3       16.80       46.85     49.00 o
  -4 -11   3        9.23      -35.02     35.02 o
  -3 -11   3        6.96       -4.03     42.46 o
  -2 -11   3       57.27       40.15     28.76 o
  -1 -11   3        8.04       -9.57     23.85 o
   0 -11   3       31.27       31.35     26.26 o
   1 -11   3       87.39      100.36     29.95 o
   2 -11   3        1.60      -21.38     23.12 o
   3 -11   3       53.97       88.23     43.89 o
  -6 -10   3       20.16       10.57     44.52 o
  -5 -10   3       53.31       45.20     31.39 o
  -4 -10   3       36.84       -7.88     26.41 o
  -3 -10   3       11.48       -0.94     27.12 o
  -2 -10   3       51.02       63.90     28.81 o
  -1 -10   3        1.58       -2.12     22.63 o
   0 -10   3      206.69      205.50     32.81 o
   1 -10   3        4.11       -8.44     21.83 o
   2 -10   3       13.37       26.72     23.69 o
   3 -10   3       19.73       60.55     39.86 o
   4 -10   3        8.58      -14.33     33.50 o
  -7  -9   3        7.28       29.38     46.22 o
  -6  -9   3        5.34       52.76     46.22 o
  -5  -9   3      383.26      383.09     63.06 o
  -4  -9   3      317.58      296.12     55.53 o
  -3  -9   3       51.44       75.50     31.60 o
  -2  -9   3      358.75      338.02     40.75 o
  -1  -9   3        0.25      -20.91     20.91 o
   0  -9   3       17.25       15.05     24.68 o
   1  -9   3       63.34       91.88     26.97 o
   2  -9   3      197.76      221.82     31.98 o
   3  -9   3        0.45      -18.14     18.14 o
   4  -9   3        4.15       23.74     37.08 o
   5  -9   3       34.23       41.29     42.37 o
  -8  -8   3       67.77      133.01     55.53 o
  -7  -8   3        7.66       28.21     44.70 o
  -6  -8   3       50.10       39.95     46.31 o
  -5  -8   3      245.33      227.06     54.64 o
  -4  -8   3       13.03       46.04     43.98 o
  -3  -8   3       84.90       80.43     42.99 o
  -2  -8   3      758.36      742.01     49.58 o
  -1  -8   3      126.61      159.10     33.68 o
   0  -8   3      194.77      267.23     49.85 o
   1  -8   3      417.93      427.57     38.27 o
   2  -8   3      108.46      110.22     26.03 o
   3  -8   3      235.44      242.13     41.25 o
   4  -8   3        0.75      -20.96     31.08 o
   5  -8   3      157.39      110.53     48.91 o
   6  -8   3        0.18       36.01     45.68 o
  -8  -7   3       18.11       51.95     48.01 o
  -7  -7   3       82.70       96.92     50.79 o
  -6  -7   3      140.74      219.81     53.47 o
  -5  -7   3      157.74      163.83     51.95 o
  -4  -7   3      117.26       93.87     46.13 o
  -3  -7   3       37.77       41.02     39.32 o
  -2  -7   3      171.80      175.29     41.20 o
  -1  -7   3      377.91      400.67     35.65 o
   0  -7   3        2.82        1.48     19.11 o
   1  -7   3        2.98        6.98     18.55 o
   2  -7   3       21.91       35.96     25.26 o
   3  -7   3       30.06       46.83     27.23 o
   4  -7   3      280.22      270.40     34.89 o
   5  -7   3        9.16       16.12     36.19 o
   6  -7   3       42.16       72.37     49.00 o
  -8  -6   3       43.86       44.88     46.13 o
  -7  -6   3       37.68       18.99     40.84 o
  -6  -6   3       19.88        3.05     39.95 o
  -5  -6   3        3.28      -10.93     39.68 o
  -4  -6   3       17.25       20.06     39.95 o
  -3  -6   3      379.83      468.10     54.01 o
  -2  -6   3     1121.34     1207.42     69.87 o
  -1  -6   3        4.73       -1.52     25.98 o
   0  -6   3        9.44       13.77     17.86 o
   1  -6   3      419.57      414.39     32.76 o
   2  -6   3      128.27      134.10     23.48 o
   3  -6   3        2.38        9.08     17.66 o
   4  -6   3        0.38      -15.67     17.58 o
   5  -6   3      114.62      149.67     47.65 o
   6  -6   3       27.79       39.86     41.47 o
   7  -6   3        0.53        5.64     41.02 o
  -8  -5   3        4.83       21.05     44.43 o
  -7  -5   3      185.61      202.16     57.95 o
  -6  -5   3      132.32      150.12     51.41 o
  -5  -5   3        2.85       -6.00     37.17 o
  -4  -5   3       14.74       30.27     33.50 o
  -3  -5   3      357.60      348.07     46.58 o
  -2  -5   3       25.78       19.35     27.23 o
  -1  -5   3      146.45       73.95     82.36 o
   0  -5   3        3.42      -10.69     10.69 o
   1  -5   3      307.21      295.41     25.60 o
   2  -5   3        7.67       11.57     14.70 o
   3  -5   3       29.58       36.81     16.79 o
   4  -5   3       14.71       20.56     16.28 o
   5  -5   3       56.08       45.06     14.61 o
   6  -5   3       48.20       37.89     39.05 o
   7  -5   3      268.71      224.11     62.61 o
  -9  -4   3       73.11      143.40     60.10 o
  -8  -4   3        4.40        1.79     39.32 o
  -7  -4   3       14.78       48.19     42.73 o
  -6  -4   3       23.31        2.78     39.86 o
  -5  -4   3       11.94       16.48     35.11 o
  -4  -4   3      130.66       83.39     35.56 o
  -3  -4   3       16.54       16.75     26.78 o
  -2  -4   3        7.11        7.52     15.28 o
  -1  -4   3      214.81      232.18     24.28 o
   0  -4   3      215.00      228.06     24.12 o
   1  -4   3        5.94       -0.16     10.72 o
   2  -4   3      649.18      734.25     65.30 o
   3  -4   3      301.84      308.06     22.15 o
   4  -4   3       16.15       28.46     10.06 o
   5  -4   3       70.85       96.05     17.96 o
   6  -4   3       20.22        5.37     35.47 o
   7  -4   3      240.15      268.09     64.40 o
   8  -4   3        4.26       35.47     44.07 o
  -9  -3   3        0.07       24.54     50.97 o
  -8  -3   3       11.36      -17.02     39.77 o
  -7  -3   3      268.16      270.86     60.19 o
  -6  -3   3       13.97       16.93     37.08 o
  -5  -3   3       92.93       66.46     38.16 o
  -4  -3   3      307.37      331.86     47.47 o
  -3  -3   3      296.44      316.81     42.46 o
  -2  -3   3      280.54      311.03     27.01 o
  -1  -3   3      324.91      307.15     26.33 o
   0  -3   3     2010.69     1960.50     47.45 o
   1  -3   3      144.28      154.10     20.98 o
   2  -3   3      192.46      201.48     47.79 o
   3  -3   3      573.49      539.40     51.15 o
   4  -3   3      178.87      188.64     39.32 o
   5  -3   3        2.15        4.83     13.89 o
   6  -3   3      169.11      195.53     50.07 o
   7  -3   3      176.22      165.26     53.47 o
   8  -3   3        8.75       14.96     37.98 o
  -9  -2   3        0.72       45.86     50.61 o
  -8  -2   3       24.04       12.81     40.93 o
  -7  -2   3       58.48       63.51     44.61 o
  -6  -2   3       38.69       48.91     42.64 o
  -5  -2   3      250.53      258.32     50.70 o
  -4  -2   3      406.93      431.28     53.65 o
  -3  -2   3      755.80      758.49     56.43 o
  -2  -2   3     1416.44     1359.87     44.02 o
  -1  -2   3       26.25       25.95     14.09 o
   0  -2   3     5578.88     5499.09     69.79 o
   1  -2   3       31.05       37.31     11.35 o
   2  -2   3     3034.78     3096.23    131.89 o
   3  -2   3      417.90      397.07     41.83 o
   4  -2   3      856.65      810.05     26.14 o
   5  -2   3       17.56        6.56     14.95 o
   6  -2   3       69.47       48.19     38.07 o
   7  -2   3       16.63       34.57     41.02 o
   8  -2   3        3.16       15.67     36.63 o
   9  -2   3       22.00        4.39     50.97 o
  -9  -1   3        6.51       36.99     50.70 o
  -8  -1   3       44.72       63.51     48.28 o
  -7  -1   3        2.27      -10.39     35.83 o
  -6  -1   3       20.12       -6.45     36.28 o
  -5  -1   3      669.78      701.88     70.85 o
  -4  -1   3      141.95      133.16     24.64 o
  -3  -1   3      144.09      151.30     22.15 o
  -2  -1   3       13.26       10.41     11.78 o
  -1  -1   3     2235.34     2083.54     37.31 o
   0  -1   3     6598.22     6111.05    148.79 o
   1  -1   3      433.50      453.43     13.78 o
   2  -1   3       63.32       59.72     15.72 o
   3  -1   3      614.70      618.98     20.03 o
   4  -1   3     1341.73     1294.96     35.37 o
   5  -1   3      316.54      310.64     27.51 o
   6  -1   3        0.48        1.36     19.88 o
   7  -1   3       88.16       78.64     44.61 o
   8  -1   3       30.68       15.85     40.31 o
   9  -1   3       14.71       48.73     48.28 o
  -8   0   3      103.66      123.34     56.97 o
  -7   0   3        3.69        4.39     37.80 o
  -6   0   3      143.75      158.45     50.88 o
  -5   0   3       16.88       15.02     21.59 o
  -4   0   3      175.79      209.94     27.69 o
  -3   0   3      120.77       96.03     18.98 o
  -2   0   3       83.07       98.61     12.84 o
  -1   0   3      564.89      489.32     18.46 o
   0   0   3        2.82        6.90      6.05 o
   1   0   3     4350.24     4205.19     50.69 o
   2   0   3     8058.24     8087.43     64.27 o
   3   0   3      724.53      736.24     70.31 o
   4   0   3        0.06       -3.13     11.95 o
   5   0   3       74.55       67.53     19.04 o
   6   0   3      644.41      580.78     70.67 o
   7   0   3        3.70        1.07     34.48 o
   8   0   3        0.62       -9.58     37.98 o
   9   0   3       13.63       20.69     44.70 o
  -8   1   3       57.63       85.45     54.19 o
  -7   1   3        0.28       22.21     39.14 o
  -6   1   3        3.39       -5.49     25.26 o
  -5   1   3       13.54       -7.73     21.32 o
  -4   1   3      459.14      470.06     35.94 o
  -3   1   3       95.93       83.60     19.56 o
  -2   1   3     1212.78     1252.75     28.93 o
  -1   1   3        0.13       -6.35     10.61 o
   0   1   3     2314.27     2232.78     31.40 o
   1   1   3     1826.41     1752.93     27.02 o
   2   1   3    25186.41    24969.11    371.99 o
   3   1   3      793.71      816.37     28.75 o
   4   1   3      433.34      470.34     47.65 o
   5   1   3      103.17       89.75     33.95 o
   6   1   3      204.16      245.51     50.61 o
   7   1   3        7.67       31.80     37.53 o
   8   1   3        0.76        2.06     35.83 o
   9   1   3       19.84       81.60     55.44 o
  -8   2   3       24.63       13.08     44.16 o
  -7   2   3       49.92       44.74     27.14 o
  -6   2   3      257.44      199.56     33.76 o
  -5   2   3        6.10        7.80     21.95 o
  -4   2   3      139.74      128.02     24.82 o
  -3   2   3      128.28      134.62     21.69 o
  -2   2   3      208.56      235.16     18.68 o
  -1   2   3       49.40       47.50     12.78 o
   0   2   3     1842.82     1754.04     24.59 o
   1   2   3       17.34       22.93     10.76 o
   2   2   3     1086.64     1174.86     23.16 o
   3   2   3      248.21      281.64     18.27 o
   4   2   3     4471.81     4534.35    117.34 o
   5   2   3        0.02       26.42     27.05 o
   6   2   3      776.52      732.51     71.84 o
   7   2   3       22.80       42.01     38.61 o
   8   2   3       49.72       53.74     47.11 o
   9   2   3        8.32      -34.66     43.80 o
  -8   3   3       81.08      157.91     62.43 o
  -7   3   3      354.00      386.27     43.58 o
  -6   3   3       29.16       40.37     24.24 o
  -5   3   3       14.08       35.12     23.33 o
  -4   3   3      262.11      254.88     31.16 o
  -3   3   3      276.05      287.58     28.44 o
  -2   3   3        5.82       13.11     12.47 o
  -1   3   3       73.47       65.82     12.48 o
   0   3   3     1700.53     1755.57     34.35 o
   1   3   3       21.87       30.27     20.87 o
   2   3   3      404.56      373.39     22.29 o
   3   3   3     1812.65     1755.65     36.32 o
   4   3   3      751.20      741.52     36.61 o
   5   3   3      412.97      415.88     51.77 o
   6   3   3      103.67      117.07     42.46 o
   7   3   3        0.08      -16.03     36.46 o
   8   3   3       36.74       47.83     44.61 o
   9   3   3       29.58       18.72     43.26 o
  -7   4   3       73.19       41.20     32.16 o
  -6   4   3       42.74       46.73     24.76 o
  -5   4   3       67.88       60.21     27.15 o
  -4   4   3        1.14        6.50     21.08 o
  -3   4   3        6.25       -2.12     18.59 o
  -2   4   3      110.76      110.80     20.83 o
  -1   4   3      723.91      797.29     28.87 o
   0   4   3        6.90       11.73      8.06 o
   1   4   3      807.63      728.12     50.79 o
   2   4   3        5.90        6.71      6.89 o
   3   4   3      239.74      250.07     17.63 o
   4   4   3     1841.97     1932.53     44.53 o
   5   4   3      212.17      215.23     28.90 o
   7   4   3        9.40       30.90     35.29 o
   8   4   3      105.46      165.62     49.53 o
   9   4   3       39.58       52.72     30.68 o
  -6   5   3      219.59      215.94     34.94 o
  -5   5   3       25.95       11.23     24.20 o
  -4   5   3      369.36      368.66     37.87 o
  -3   5   3      652.58      608.30     41.64 o
  -2   5   3      913.02      884.34     42.04 o
  -1   5   3     1052.55     1073.18     43.06 o
   0   5   3     2856.92     2837.01     38.21 o
   1   5   3       79.38       88.94     28.48 o
   2   5   3      778.18      821.90     62.70 o
   3   5   3        8.09       20.58     10.51 o
   4   5   3      953.22      922.52     33.40 o
   5   5   3      150.17      149.82     40.26 o
   6   5   3      285.42      300.46     36.70 o
   7   5   3        8.73       23.48     23.47 o
   8   5   3        7.08        6.53     23.71 o
   9   5   3        3.11       11.55     27.57 o
  -6   6   3        1.59       -5.60     22.52 o
  -5   6   3        9.93       25.98     25.36 o
  -4   6   3      282.42      244.31     56.34 o
  -3   6   3        0.01        7.41     22.43 o
  -2   6   3      502.73      540.61     37.75 o
  -1   6   3      287.25      280.17     21.13 o
   0   6   3       62.34       49.91     11.69 o
   1   6   3       24.24        9.23     27.59 o
   2   6   3       68.32       92.35     32.34 o
   3   6   3       96.96      113.74     13.38 o
   4   6   3       15.00       14.18     15.43 o
   5   6   3        0.47       16.76     27.63 o
   6   6   3       32.90       26.71     25.38 o
   7   6   3        2.47        8.19     23.40 o
   8   6   3       95.79      153.79     35.78 o
   9   6   3       28.06       23.06     27.84 o
  -6   7   3       16.83      -18.27     41.92 o
  -5   7   3       78.01       73.06     29.05 o
  -4   7   3      937.32      951.67     56.40 o
  -3   7   3        1.68        8.18     23.03 o
  -2   7   3      112.71      122.26     26.31 o
  -1   7   3      128.62      135.31     19.24 o
   0   7   3       66.39       50.66     13.54 o
   1   7   3      728.00      678.50     67.81 o
   2   7   3      610.28      601.74     68.43 o
   3   7   3      310.47      311.86     18.10 o
   4   7   3        1.17       21.36     13.90 o
   5   7   3       40.50       44.70     25.59 o
   6   7   3        9.12       12.49     24.29 o
   7   7   3      185.29      228.55     44.02 o
   8   7   3       14.24       37.72     27.74 o
   9   7   3       13.84       50.49     29.07 o
  -5   8   3       19.70       36.81     43.17 o
  -4   8   3      144.03      141.77     33.16 o
  -3   8   3      251.25      259.85     42.05 o
  -2   8   3      618.24      569.60     50.61 o
  -1   8   3       37.28       27.83     21.02 o
   0   8   3        0.50       -5.06     13.31 o
   1   8   3      146.08      119.58     41.92 o
   2   8   3        0.28       26.15     38.96 o
   3   8   3       17.22       -0.36     37.71 o
   4   8   3      770.69      817.56     43.61 o
   5   8   3       30.43       30.95     25.29 o
   6   8   3       85.90       86.24     29.20 o
   7   8   3        6.47        7.72     26.32 o
   8   8   3       22.06       46.99     31.20 o
  -5   9   3        1.96       17.65     37.35 o
  -4   9   3       18.95        2.60     27.01 o
  -3   9   3        1.39       -5.39     22.98 o
  -2   9   3       66.61       62.02     25.62 o
  -1   9   3       82.68       89.38     24.99 o
   0   9   3        0.80        5.43     17.12 o
   1   9   3        1.00       -1.61     40.58 o
   2   9   3       50.88       15.41     43.44 o
   3   9   3      229.78      191.50     56.25 o
   4   9   3      157.22      169.38     55.00 o
   5   9   3        1.55      -22.75     30.81 o
   6   9   3       61.41       27.05     43.62 o
   7   9   3        0.08       15.85     43.53 o
   8   9   3        5.66       -6.99     43.98 o
  -3  10   3        6.70       35.92     43.44 o
  -2  10   3       14.84       22.39     40.04 o
  -1  10   3       23.90        7.61     40.67 o
   0  10   3        1.29      -21.23     36.28 o
   1  10   3        0.10       18.99     40.04 o
   2  10   3      360.56      254.02     60.37 o
   3  10   3       99.59       93.96     46.67 o
   4  10   3        0.06        8.96     41.56 o
   5  10   3       75.75       40.58     49.08 o
   6  10   3        2.76       28.84     45.32 o
   7  10   3        0.73       37.35     47.83 o
  -3  11   3       11.21      -20.96     42.37 o
  -2  11   3       14.06      -28.75     40.67 o
  -1  11   3        0.52      -39.23     39.23 o
   0  11   3       38.69       21.68     44.43 o
   1  11   3        3.44        9.40     41.83 o
   2  11   3       76.28       75.96     48.64 o
   3  11   3       16.14       28.13     46.67 o
   4  11   3       64.78       28.13     48.37 o
   5  11   3        2.14        2.06     44.70 o
   6  11   3       13.62        0.63     45.32 o
  -1  12   3        0.80        6.54     47.83 o
   0  12   3        5.86        3.13     42.01 o
   1  12   3      193.07      238.26     64.85 o
   2  12   3       18.73       10.48     44.96 o
   3  12   3       18.94       36.19     48.91 o
   4  12   3        4.84        0.63     46.31 o
   5  12   3       15.61       35.83     50.43 o
   2  13   3        4.71        0.27     50.61 o
  -4 -12   4        4.80       -2.24     43.98 o
  -3 -12   4       13.98      -16.39     41.38 o
  -2 -12   4        0.27       15.41     44.52 o
  -1 -12   4        0.40       19.80     43.44 o
   0 -12   4       14.40       49.00     45.32 o
   1 -12   4        0.04        1.70     35.92 o
  -5 -11   4       45.96       41.02     50.79 o
  -4 -11   4       11.42        5.81     30.50 o
  -3 -11   4        1.38      -27.77     27.77 o
  -2 -11   4        7.93       -3.40     25.86 o
  -1 -11   4       57.48       38.30     34.04 o
   0 -11   4       14.59       36.75     26.92 o
   1 -11   4       43.72       37.50     27.46 o
   2 -11   4       36.81       51.95     26.09 o
   3 -11   4       27.40       28.13     38.78 o
  -6 -10   4        4.53       34.40     50.16 o
  -5 -10   4      255.29      219.63     64.31 o
  -4 -10   4        3.46       -2.24     44.25 o
  -3 -10   4        0.00      -25.11     26.19 o
  -2 -10   4       29.47       24.91     26.64 o
  -1 -10   4       47.97       13.37     26.12 o
   0 -10   4      190.31      201.34     34.76 o
   1 -10   4       99.14      126.84     29.82 o
   2 -10   4        6.40       25.29     24.42 o
   3 -10   4        3.99        5.11     34.66 o
   4 -10   4        0.23      -11.47     36.90 o
  -7  -9   4       35.29       18.00     45.95 o
  -6  -9   4        0.84       24.72     46.58 o
  -5  -9   4      111.71       94.50     50.79 o
  -4  -9   4        0.22      -24.99     39.14 o
  -3  -9   4      101.14       63.06     43.62 o
  -2  -9   4      103.23      105.41     31.98 o
  -1  -9   4       15.14        5.73     24.37 o
   0  -9   4      128.85      120.18     30.26 o
   1  -9   4      143.23      122.90     29.80 o
   2  -9   4      622.90      690.34     46.65 o
   3  -9   4        6.47       20.39     20.79 o
   4  -9   4       13.32       41.74     40.58 o
   5  -9   4       33.55       30.63     42.55 o
  -7  -8   4       56.53       55.00     52.31 o
  -6  -8   4      112.94       95.03     50.97 o
  -5  -8   4        9.06        6.81     40.49 o
  -4  -8   4       44.91       43.80     47.65 o
  -3  -8   4      121.19      134.98     50.25 o
  -2  -8   4       15.76       40.67     39.05 o
  -1  -8   4       42.60        4.25     24.09 o
   0  -8   4      203.80      202.22     31.16 o
   1  -8   4      186.07      201.26     30.58 o
   2  -8   4       17.57        5.18     21.53 o
   3  -8   4      220.32      270.36     38.92 o
   4  -8   4        4.09       12.63     34.75 o
   5  -8   4       21.26      -16.39     36.10 o
   6  -8   4        0.38       23.29     44.61 o
  -8  -7   4        4.07       58.49     49.71 o
  -7  -7   4       39.00       33.95     45.14 o
  -6  -7   4        0.22       17.20     43.44 o
  -5  -7   4        0.69       10.84     43.17 o
  -4  -7   4       29.43       17.20     40.75 o
  -3  -7   4       40.17        3.49     41.11 o
  -2  -7   4        5.88      -11.47     36.10 o
  -1  -7   4       93.88      155.94     41.02 o
   0  -7   4        6.43       15.45     20.26 o
   1  -7   4      384.50      415.95     35.94 o
   2  -7   4       22.43       18.12     20.03 o
   3  -7   4       18.36        2.23     20.49 o
   4  -7   4        4.14       13.44     35.29 o
   5  -7   4       14.67       18.63     38.16 o
   6  -7   4       56.20       55.35     44.43 o
  -8  -6   4       46.35       24.18     47.38 o
  -7  -6   4       36.17       81.60     49.80 o
  -6  -6   4      125.86      141.97     51.32 o
  -5  -6   4       22.55      -12.27     41.65 o
  -4  -6   4        5.17       11.91     39.77 o
  -3  -6   4     1537.10     1464.66     86.70 o
  -2  -6   4       10.57       26.87     32.07 o
  -1  -6   4       60.08       32.16     31.53 o
   0  -6   4       88.20       78.55     31.08 o
   1  -6   4      226.00      216.01     26.22 o
   2  -6   4       72.13       72.93     20.68 o
   3  -6   4       12.08        2.25     18.30 o
   4  -6   4      334.86      312.52     29.51 o
   5  -6   4      259.59      344.40     60.10 o
   6  -6   4       16.98       20.78     39.77 o
   7  -6   4      150.72      200.64     63.33 o
  -8  -5   4       26.74       37.71     48.01 o
  -7  -5   4       17.01        2.42     39.14 o
  -6  -5   4       54.04       17.65     40.58 o
  -5  -5   4        0.02      -27.41     36.63 o
  -4  -5   4      380.37      390.98     56.97 o
  -3  -5   4       19.15       39.86     32.69 o
  -2  -5   4      132.87      143.94     39.41 o
  -1  -5   4        3.24       14.42     27.14 o
   0  -5   4       27.22       27.50     26.24 o
   1  -5   4       40.31       32.15     16.13 o
   2  -5   4        9.13       -1.24     13.67 o
   3  -5   4       41.11       46.24     16.60 o
   4  -5   4        0.00       16.39     31.62 o
   5  -5   4      159.24      158.81     48.28 o
   6  -5   4       37.41       27.86     37.89 o
   7  -5   4      129.25      183.62     60.01 o
  -8  -4   4        0.14       54.82     47.83 o
  -7  -4   4        0.19       21.94     40.93 o
  -6  -4   4       90.39       32.34     44.88 o
  -5  -4   4        1.55       22.21     38.25 o
  -4  -4   4       16.15       18.72     32.69 o
  -3  -4   4      611.32      583.20     58.85 o
  -2  -4   4     2205.50     2333.32     87.96 o
  -1  -4   4      134.18      180.68     23.85 o
   0  -4   4      126.33       87.08     20.65 o
   1  -4   4      208.27      232.62     35.38 o
   2  -4   4     3298.24     3470.81     58.47 o
   3  -4   4       19.84       13.73     11.07 o
   4  -4   4        0.15        1.70     29.47 o
   5  -4   4      312.87      274.89     54.73 o
   6  -4   4        4.74       11.11     34.66 o
   7  -4   4      138.37      138.57     54.55 o
   8  -4   4        6.65       26.24     45.77 o
  -8  -3   4       48.47       58.58     51.41 o
  -7  -3   4        0.50       18.90     41.65 o
  -6  -3   4        3.94      -36.63     36.63 o
  -5  -3   4      283.93      266.92     54.01 o
  -4  -3   4       57.02       52.49     34.13 o
  -3  -3   4        2.23       -0.81     27.32 o
  -2  -3   4        8.12        1.16     24.27 o
  -1  -3   4       88.37       83.31     20.20 o
   0  -3   4       58.66       24.72     21.98 o
   1  -3   4      168.93      184.98     23.14 o
   2  -3   4        0.85        2.93     11.42 o
   3  -3   4       23.78        1.61     24.90 o
   4  -3   4       78.66       84.64     31.98 o
   5  -3   4        2.81        3.58     31.80 o
   6  -3   4       76.70       71.93     42.46 o
   7  -3   4       36.45       86.35     47.56 o
   8  -3   4       45.15       49.98     50.52 o
  -8  -2   4      110.06      129.16     56.34 o
  -7  -2   4       64.35      101.30     49.44 o
  -6  -2   4        9.18       33.95     42.81 o
  -5  -2   4        6.23       13.26     32.42 o
  -4  -2   4        3.49       32.51     30.81 o
  -3  -2   4      653.21      689.22     40.14 o
  -2  -2   4        6.88       -0.07     14.75 o
  -1  -2   4        5.93        9.35     10.18 o
   0  -2   4      918.56      795.23    104.78 o
   1  -2   4        2.04        4.19     10.27 o
   2  -2   4        9.94        2.96     21.05 o
   3  -2   4     1640.55     1701.49     79.09 o
   4  -2   4      758.68      649.39     56.79 o
   5  -2   4       83.37       92.44     36.19 o
   6  -2   4       24.94        6.54     35.83 o
   7  -2   4       43.51       19.97     38.96 o
   8  -2   4       22.58       25.26     43.80 o
   9  -2   4       11.16      -15.14     46.49 o
  -8  -1   4      144.58      171.71     61.98 o
  -7  -1   4      128.59      207.27     57.33 o
  -6  -1   4      265.39      265.31     59.30 o
  -5  -1   4       13.92        7.44     23.43 o
  -4  -1   4      120.12      100.51     24.33 o
  -3  -1   4        9.35       -1.81     16.56 o
  -2  -1   4      191.08      187.61     17.89 o
  -1  -1   4      683.14      698.82     23.58 o
   0  -1   4      604.91      551.86     19.31 o
   1  -1   4      374.34      388.73     15.49 o
   2  -1   4     3282.94     3394.07     64.04 o
   3  -1   4      371.43      335.44     41.56 o
   4  -1   4      805.58      790.76     25.61 o
   5  -1   4       31.41       25.79     15.26 o
   6  -1   4      345.92      344.68     30.80 o
   7  -1   4       18.79       20.15     37.80 o
   8  -1   4        5.69        8.15     39.86 o
   9  -1   4       12.98       38.25     50.43 o
  -8   0   4       77.25       33.86     47.38 o
  -7   0   4        0.27        4.57     40.58 o
  -6   0   4       21.35        2.29     26.16 o
  -5   0   4       30.68       16.09     23.91 o
  -4   0   4      131.30      120.68     24.80 o
  -3   0   4      422.15      444.20     33.32 o
  -2   0   4       92.37      100.66     15.40 o
  -1   0   4     3608.67     3555.82     42.46 o
   0   0   4     1228.67     1190.55     23.90 o
   1   0   4     7575.34     7459.71    109.00 o
   2   0   4       15.71       43.54      8.80 o
   3   0   4     1406.62     1330.25     33.84 o
   4   0   4       15.68       30.22     11.84 o
   5   0   4      139.39      144.09     21.24 o
   6   0   4      294.81      287.88     52.13 o
   7   0   4       74.84      108.20     46.31 o
   8   0   4      186.40      174.75     57.95 o
   9   0   4       28.56       14.06     43.71 o
  -8   1   4        0.01       17.65     43.98 o
  -7   1   4       73.18       64.96     28.43 o
  -6   1   4      162.57      131.18     32.17 o
  -5   1   4        3.85       -7.76     22.41 o
  -4   1   4      191.10      213.98     29.84 o
  -3   1   4        1.59       20.88     16.81 o
  -2   1   4     1054.30     1132.56     33.92 o
  -1   1   4       55.64       63.57     11.87 o
   0   1   4     3600.57     3653.30     42.50 o
   1   1   4        0.35       -5.20      9.66 o
   2   1   4     1219.79     1253.35     24.33 o
   3   1   4     2480.06     2680.79     62.78 o
   4   1   4     1309.05     1304.76     42.63 o
   5   1   4       36.03       33.79     17.75 o
   6   1   4       11.96       16.48     32.60 o
   7   1   4      222.63      203.59     50.07 o
   8   1   4        9.51       13.53     38.87 o
   9   1   4       24.17       66.37     53.56 o
  -8   2   4       42.34       -0.99     44.88 o
  -7   2   4       82.53       63.02     29.53 o
  -6   2   4      309.45      272.82     37.77 o
  -5   2   4      279.00      277.69     36.51 o
  -4   2   4      281.93      326.77     34.12 o
  -3   2   4       58.67       77.75     20.55 o
  -2   2   4      980.05      992.43     32.63 o
  -1   2   4      232.92      163.02     61.33 o
   0   2   4      768.82      776.59     20.32 o
   1   2   4       13.59       30.81      9.40 o
   2   2   4     1991.41     1919.48     47.93 o
   3   2   4        3.54       -2.18     10.13 o
   4   2   4     1410.75     1482.44     47.18 o
   5   2   4       89.82       89.27     21.77 o
   6   2   4     1415.74     1408.75     58.76 o
   7   2   4       23.75        7.05     23.64 o
   8   2   4       71.41      108.80     30.13 o
   9   2   4       24.75      -10.57     42.90 o
  -8   3   4        0.31      -18.54     43.89 o
  -7   3   4       17.26       23.89     27.53 o
  -6   3   4        4.98        2.19     23.75 o
  -5   3   4      197.34      187.07     33.88 o
  -4   3   4       23.75        8.60     30.19 o
  -3   3   4      129.50       91.81     31.71 o
  -2   3   4      188.49      135.18     26.42 o
  -1   3   4       29.87       28.77     11.41 o
   0   3   4     3438.10     3658.39     81.65 o
   1   3   4       39.41       30.42     14.15 o
   2   3   4      312.29      303.04     14.90 o
   3   3   4      423.37      450.54     22.01 o
   4   3   4     1205.35     1238.36     45.46 o
   5   3   4      152.78      169.29     25.20 o
   6   3   4        0.87       -6.75     20.37 o
   7   3   4        4.03      -15.33     21.27 o
   8   3   4       13.64       31.73     25.37 o
   9   3   4        0.12      -14.42     41.83 o
  -7   4   4       42.87       48.61     28.24 o
  -6   4   4       13.08       31.96     26.84 o
  -5   4   4       81.45      106.23     40.22 o
  -4   4   4       10.01        4.22     22.20 o
  -3   4   4      244.87      261.32     30.15 o
  -2   4   4       25.83       29.60     17.34 o
  -1   4   4        9.52        8.13     10.33 o
   0   4   4     1402.96     1306.19     25.57 o
   1   4   4     1015.97     1020.03     61.36 o
   2   4   4      462.92      438.71     18.83 o
   3   4   4       72.54       71.65     12.17 o
   4   4   4     2045.38     2041.86     51.41 o
   5   4   4      838.45      863.76     45.19 o
   6   4   4      129.84      179.67     31.49 o
   7   4   4       63.21       46.47     26.15 o
   8   4   4        2.27      -27.23     27.23 o
   9   4   4       21.59       46.53     27.83 o
  -7   5   4        2.87       16.75     44.07 o
  -6   5   4       44.95      101.81     31.33 o
  -5   5   4        0.53      -18.88     20.74 o
  -4   5   4       34.26       49.06     26.12 o
  -3   5   4      102.95      127.49     26.57 o
  -2   5   4      189.01      208.41     27.67 o
  -1   5   4      106.51      100.84     14.76 o
   0   5   4       39.01       58.90     10.03 o
   1   5   4       39.16       52.58     29.56 o
   2   5   4       90.03       93.51     30.90 o
   3   5   4      236.87      248.09     18.90 o
   4   5   4      264.32      314.45     22.53 o
   5   5   4      895.07      913.87     48.32 o
   6   5   4      301.03      262.83     44.25 o
   7   5   4        2.46        4.38     28.93 o
   8   5   4       31.65       30.23     26.65 o
   9   5   4       37.37       58.11     28.38 o
  -6   6   4      106.17       83.12     37.44 o
  -5   6   4      362.29      321.66     40.49 o
  -4   6   4      833.66      797.78     52.35 o
  -3   6   4      298.85      320.77     36.81 o
  -2   6   4       26.13       28.10     20.45 o
  -1   6   4        6.57       16.07     13.38 o
   0   6   4      119.05      169.24     19.38 o
   1   6   4      293.95      221.42     43.71 o
   2   6   4        4.82       -1.34     28.21 o
   3   6   4        3.67        7.16      9.07 o
   4   6   4      858.88      901.61     35.30 o
   5   6   4      158.77      174.67     28.89 o
   6   6   4      111.76      162.36     31.42 o
   7   6   4       12.65       21.09     24.82 o
   8   6   4       12.95      -12.58     22.96 o
   9   6   4        5.44       14.71     27.27 o
  -5   7   4       39.80        6.88     27.74 o
  -4   7   4       23.37       -4.83     23.41 o
  -3   7   4       59.88       52.20     25.52 o
  -2   7   4      291.81      296.34     36.10 o
  -1   7   4       37.08       20.14     15.88 o
   0   7   4       42.77       57.85     18.93 o
   1   7   4       36.63       65.83     38.07 o
   2   7   4       41.96       42.81     33.95 o
   3   7   4       85.77      101.30     39.50 o
   4   7   4        5.65       -2.93     13.18 o
   5   7   4      123.00      119.52     27.89 o
   6   7   4      230.50      250.93     35.75 o
   7   7   4       47.77       30.86     26.38 o
   8   7   4       14.25       41.18     27.21 o
   9   7   4       27.92       22.99     49.71 o
  -5   8   4       14.64      -23.29     36.10 o
  -4   8   4       27.47        1.28     25.46 o
  -3   8   4      157.58      196.00     51.73 o
  -2   8   4      189.95      155.86     41.52 o
  -1   8   4        1.09       13.66     20.91 o
   0   8   4      405.99      347.17     34.48 o
   1   8   4       77.94      118.05     43.26 o
   2   8   4       14.91       13.26     38.87 o
   3   8   4      629.49      632.01     75.60 o
   4   8   4      251.38      228.49     26.06 o
   5   8   4       16.36       49.20     25.18 o
   6   8   4       50.19       59.92     26.70 o
   7   8   4        0.47        9.14     25.20 o
   8   8   4       39.31       59.03     46.94 o
  -4   9   4        2.08        6.52     27.91 o
  -3   9   4        1.78       -9.45     24.52 o
  -2   9   4       95.54      120.79     28.75 o
  -1   9   4       36.42       29.20     21.79 o
   0   9   4      167.28      201.27     54.46 o
   1   9   4      561.90      540.11     73.99 o
   2   9   4       16.73       10.57     39.50 o
   3   9   4      134.00       96.29     49.53 o
   4   9   4      224.62      176.99     55.53 o
   5   9   4       15.23       45.32     42.55 o
   6   9   4        1.65      -23.29     39.86 o
   7   9   4        2.23       19.88     42.64 o
   8   9   4       32.90      124.77     58.22 o
  -3  10   4       30.45       27.32     44.07 o
  -2  10   4        0.01        2.96     38.78 o
  -1  10   4       94.59      147.25     52.49 o
   0  10   4        1.47       -5.37     38.52 o
   1  10   4       20.27       35.02     42.28 o
   2  10   4        8.34      -19.17     38.07 o
   3  10   4        3.93       12.45     39.68 o
   4  10   4       23.51       27.14     44.52 o
   5  10   4      158.68      153.26     57.50 o
   6  10   4        6.04       40.84     43.62 o
   7  10   4        7.86       51.77     50.25 o
  -2  11   4        2.03       -4.39     46.04 o
  -1  11   4        0.02       17.38     43.35 o
   0  11   4      135.28      138.12     57.41 o
   1  11   4       13.98       53.56     47.29 o
   2  11   4        5.88       -7.08     42.55 o
   3  11   4        2.05       13.26     43.98 o
   4  11   4        0.56      -35.29     38.61 o
   5  11   4        4.47       29.92     47.65 o
   6  11   4       29.33       18.99     48.82 o
  -1  12   4       25.20       47.74     49.44 o
   0  12   4        0.71       38.87     52.76 o
   1  12   4      102.25      119.04     56.16 o
   2  12   4       11.26       50.07     48.46 o
   3  12   4        0.03        7.26     46.22 o
   4  12   4        6.93        2.78     47.29 o
   5  12   4        0.02       33.68     49.89 o
  -4 -12   5       27.86       76.22     54.64 o
  -3 -12   5       15.55       33.77     46.76 o
  -2 -12   5       47.27       70.40     52.13 o
  -1 -12   5       24.75      -10.21     39.77 o
   0 -12   5       16.64       46.04     43.17 o
   1 -12   5        1.26       29.02     38.43 o
  -4 -11   5        0.17       23.77     33.43 o
  -3 -11   5       72.28       52.07     37.17 o
  -2 -11   5      236.49      241.14     40.74 o
  -1 -11   5       68.71       65.60     30.21 o
   0 -11   5       12.80        6.04     25.99 o
   1 -11   5       25.39       30.10     27.80 o
   2 -11   5        0.80      -26.87     32.07 o
   3 -11   5        2.44       -3.58     36.99 o
  -6 -10   5       38.66       65.83     53.74 o
  -5 -10   5        2.47        8.33     48.01 o
  -4 -10   5       20.17       35.11     48.01 o
  -3 -10   5       31.27      -18.86     25.93 o
  -2 -10   5        2.02        5.31     26.07 o
  -1 -10   5        5.29       -9.58     24.80 o
   0 -10   5        0.25       -0.10     23.49 o
   1 -10   5        8.60       11.09     22.93 o
   2 -10   5      196.77      171.45     38.74 o
   3 -10   5        1.05        3.76     36.10 o
   4 -10   5        7.45       50.97     42.99 o
  -7  -9   5        7.40       73.90     49.17 o
  -6  -9   5       12.17       21.23     48.73 o
  -5  -9   5       19.33      -32.07     42.90 o
  -4  -9   5      353.85      314.93     62.25 o
  -3  -9   5       12.14      -23.29     40.31 o
  -2  -9   5       46.76       63.33     43.17 o
  -1  -9   5       56.56       46.80     27.54 o
   0  -9   5       80.69       64.85     27.70 o
   1  -9   5        0.73      -18.83     19.69 o
   2  -9   5      592.40      627.65     46.38 o
   3  -9   5       43.49       54.19     40.22 o
   4  -9   5      261.62      251.96     57.24 o
   5  -9   5       68.44      118.14     53.65 o
  -7  -8   5        0.07       54.46     54.91 o
  -6  -8   5      119.15      144.93     55.53 o
  -5  -8   5       63.92       63.15     44.79 o
  -4  -8   5        0.98        2.69     45.05 o
  -3  -8   5       52.23       21.77     47.02 o
  -2  -8   5       41.40       73.54     45.86 o
  -1  -8   5      174.43      102.20     43.62 o
   0  -8   5        9.71       13.21     23.69 o
   1  -8   5      153.40      153.44     29.49 o
   2  -8   5        4.51       22.46     21.51 o
   3  -8   5       89.91       62.38     22.37 o
   4  -8   5      149.87       85.72     45.32 o
   5  -8   5       11.54       55.18     45.41 o
   6  -8   5        0.04       23.56     41.11 o
  -8  -7   5        3.30       48.10     51.59 o
  -7  -7   5       14.29       -5.20     44.25 o
  -6  -7   5        0.00      -27.68     44.52 o
  -5  -7   5       89.10      133.01     52.49 o
  -4  -7   5        1.23       -6.09     45.05 o
  -3  -7   5        0.01      -19.17     41.20 o
  -2  -7   5        2.02        0.72     39.50 o
  -1  -7   5       28.69       14.06     36.90 o
   0  -7   5        0.23        3.61     20.65 o
   1  -7   5        6.44        6.40     20.00 o
   2  -7   5       25.87       26.78     20.44 o
   3  -7   5      826.65      784.25     42.92 o
   4  -7   5      263.25      259.31     56.52 o
   5  -7   5       69.12       46.04     41.20 o
   6  -7   5       19.73       18.63     41.56 o
  -8  -6   5        9.97       11.20     46.40 o
  -7  -6   5        6.03      -13.17     42.55 o
  -6  -6   5        5.17       28.04     42.37 o
  -5  -6   5       53.37       78.29     49.62 o
  -4  -6   5       49.51       47.29     43.44 o
  -3  -6   5       68.79       60.10     40.75 o
  -2  -6   5      131.39       86.79     39.50 o
  -1  -6   5       45.73       51.86     36.46 o
   0  -6   5      245.67      214.25     41.11 o
   1  -6   5      366.07      353.34     30.88 o
   2  -6   5      291.69      301.94     28.66 o
   3  -6   5        0.73        7.15     17.32 o
   4  -6   5       71.22       64.31     39.59 o
   5  -6   5      204.84      237.36     54.91 o
   6  -6   5        5.21       13.70     38.87 o
   7  -6   5       10.23      -17.65     36.99 o
  -8  -5   5        2.57       -9.23     41.20 o
  -7  -5   5      195.29      201.71     59.83 o
  -6  -5   5       22.31       63.95     43.62 o
  -5  -5   5      342.63      280.63     60.37 o
  -4  -5   5       19.61        7.34     41.83 o
  -3  -5   5       29.13       36.54     35.65 o
  -2  -5   5     1263.07     1370.88     78.91 o
  -1  -5   5        2.69       16.93     30.10 o
   0  -5   5     1125.82     1269.13     72.19 o
   1  -5   5        5.27       -4.66     25.17 o
   2  -5   5      165.73      203.87     21.61 o
   3  -5   5        0.02        3.36     13.91 o
   4  -5   5      199.37      205.12     48.01 o
   5  -5   5      195.26      240.41     53.74 o
   6  -5   5      170.04      182.64     54.37 o
   7  -5   5        2.46       22.84     41.20 o
  -8  -4   5       57.45       73.99     53.83 o
  -7  -4   5        1.10       17.11     42.90 o
  -6  -4   5        0.57        1.25     41.20 o
  -5  -4   5        3.05       10.75     38.43 o
  -4  -4   5       43.24       78.82     40.22 o
  -3  -4   5      262.46      295.94     48.64 o
  -2  -4   5      424.06      422.95     49.53 o
  -1  -4   5        7.27       21.41     29.11 o
   0  -4   5      205.69      219.36     37.98 o
   1  -4   5       26.24       36.71     14.26 o
   2  -4   5       58.96       69.80     10.92 o
   3  -4   5       10.96       15.41     28.75 o
   4  -4   5      295.71      285.10     50.43 o
   5  -4   5       48.52       25.62     37.44 o
   6  -4   5       12.47       -5.91     34.22 o
   7  -4   5        1.45      -14.60     34.31 o
   8  -4   5        1.41        5.82     43.44 o
  -8  -3   5       73.29        4.57     44.70 o
  -7  -3   5       22.15       28.48     44.07 o
  -6  -3   5        0.61       -4.93     35.65 o
  -5  -3   5      223.19      193.65     53.12 o
  -4  -3   5      720.76      684.59     69.06 o
  -3  -3   5      291.29      349.42     48.82 o
  -2  -3   5       73.70      106.59     34.04 o
  -1  -3   5        9.71       13.97     23.74 o
   0  -3   5     1034.70     1024.55     42.42 o
   1  -3   5       41.99       45.24     16.35 o
   2  -3   5        6.56       15.63     13.53 o
   3  -3   5        7.26       23.11     25.44 o
   4  -3   5        9.02        5.91     28.93 o
   5  -3   5        6.67       42.28     36.10 o
   6  -3   5      228.03      221.87     53.29 o
   7  -3   5      142.79      105.34     46.76 o
   8  -3   5        4.33       20.78     44.61 o
  -8  -2   5       73.73       36.99     50.16 o
  -7  -2   5        2.54      -10.03     40.67 o
  -6  -2   5        2.16      -34.66     39.23 o
  -5  -2   5        4.08       17.65     38.61 o
  -4  -2   5        9.38       18.19     21.86 o
  -3  -2   5      638.30      683.23    105.20 o
  -2  -2   5       65.91       49.89     19.47 o
  -1  -2   5      243.19      259.94     20.75 o
   0  -2   5     1876.70     1893.36     33.28 o
   1  -2   5      248.55      249.48     14.72 o
   2  -2   5      955.36      916.64     24.34 o
   3  -2   5     1056.78      976.32     66.55 o
   4  -2   5      965.26      891.59     66.19 o
   5  -2   5      124.29      161.77     43.89 o
   6  -2   5        0.82       33.41     39.32 o
   7  -2   5      117.05      113.49     49.26 o
   8  -2   5       22.32       16.39     41.29 o
   9  -2   5        5.66       -9.85     41.02 o
  -8  -1   5       75.33       44.61     51.06 o
  -7  -1   5        0.12       -5.82     34.57 o
  -6  -1   5       13.09      -17.29     39.41 o
  -5  -1   5      150.65      177.47     65.57 o
  -4  -1   5      225.43      229.29     30.36 o
  -3  -1   5       37.59       42.95     19.40 o
  -2  -1   5       18.10       11.38     15.78 o
  -1  -1   5     4904.10     4884.86     76.66 o
   0  -1   5       90.02      115.95     13.22 o
   1  -1   5       68.15       69.38     10.75 o
   2  -1   5       41.37       39.10      7.97 o
   3  -1   5        0.13       10.48     23.83 o
   4  -1   5      243.20      231.00     38.96 o
   5  -1   5      180.55      182.93     17.77 o
   6  -1   5        2.99       -1.98     11.76 o
   7  -1   5       39.63       78.46     44.07 o
   8  -1   5        8.54        5.82     37.53 o
   9  -1   5        1.14       -1.70     44.79 o
  -8   0   5        0.48        7.43     43.53 o
  -7   0   5      220.94      200.19     56.97 o
  -6   0   5        9.60        6.26     24.45 o
  -5   0   5        0.78       -6.61     22.99 o
  -4   0   5        0.78        2.46     21.15 o
  -3   0   5      129.17      137.77     24.54 o
  -2   0   5      209.94      183.26     22.07 o
  -1   0   5      700.42      715.66     27.60 o
   0   0   5      261.90      256.04     16.44 o
   1   0   5      651.77      567.14     38.77 o
   2   0   5     1672.03     1652.59     26.90 o
   3   0   5     2146.34     2243.61    111.16 o
   4   0   5     1718.31     1652.85     42.07 o
   5   0   5       27.85       41.64     12.83 o
   6   0   5      675.51      691.17     30.10 o
   7   0   5        3.37       11.01     20.01 o
   8   0   5        1.72        3.76     35.65 o
   9   0   5       11.99       14.42     44.70 o
  -8   1   5        0.70       29.92     46.22 o
  -7   1   5        0.63       21.04     25.61 o
  -6   1   5      147.37      166.38     33.97 o
  -5   1   5        6.96       10.72     23.61 o
  -4   1   5     1962.94     1952.92     68.47 o
  -3   1   5       26.50       19.08     19.16 o
  -2   1   5     1725.82     1735.76     52.02 o
  -1   1   5      249.14      252.98     18.82 o
   0   1   5       39.17       38.24     11.57 o
   1   1   5       14.87       19.68     12.20 o
   2   1   5       38.15       40.11     10.18 o
   3   1   5     2179.68     2178.11     69.59 o
   4   1   5      454.86      488.08     29.95 o
   5   1   5      120.66      124.69     21.86 o
   6   1   5      483.67      545.63     38.79 o
   7   1   5        3.86       10.10     22.09 o
   8   1   5        0.10      -33.14     33.14 o
   9   1   5       25.05       31.44     48.46 o
  -8   2   5       25.31       58.94     52.76 o
  -7   2   5      266.38      300.74     43.28 o
  -6   2   5      201.36      186.05     35.68 o
  -5   2   5        0.30       15.43     24.79 o
  -4   2   5      113.57      134.36     28.21 o
  -3   2   5      187.04      214.97     28.00 o
  -2   2   5     1723.41     1711.27     53.83 o
  -1   2   5       26.92       27.07     12.64 o
   0   2   5       47.88       53.06     12.36 o
   1   2   5        0.62        0.25      9.43 o
   2   2   5     2387.00     2396.05     39.74 o
   3   2   5      256.14      280.07     18.90 o
   4   2   5     1253.71     1186.51     43.43 o
   5   2   5      270.47      291.45     29.04 o
   6   2   5       12.51       -0.79     20.59 o
   7   2   5        5.65       -0.58     22.28 o
   8   2   5        4.76       10.82     24.32 o
   9   2   5       33.65       48.73     50.16 o
  -7   3   5      109.96      115.19     35.43 o
  -6   3   5       85.40       77.14     29.76 o
  -5   3   5      150.11      166.37     35.31 o
  -4   3   5      176.68      178.13     32.19 o
  -3   3   5      126.19      166.86     26.87 o
  -2   3   5       65.29      103.58     21.46 o
  -1   3   5     2348.58     2345.06     44.59 o
   0   3   5       11.75        9.36     12.48 o
   1   3   5       20.35       10.55      8.83 o
   2   3   5      298.39      287.50     15.72 o
   3   3   5        0.57       -1.25     10.18 o
   4   3   5      100.35      111.67     19.74 o
   5   3   5        4.85       -1.37     18.10 o
   6   3   5       73.34       62.35     26.38 o
   7   3   5        2.29       26.00     23.81 o
   8   3   5       14.81       25.41     25.21 o
   9   3   5        2.36       56.43     47.47 o
  -7   4   5      155.47      216.44     40.51 o
  -6   4   5       24.21       27.15     27.40 o
  -5   4   5      222.93      241.03     50.70 o
  -4   4   5       52.35       12.04     24.82 o
  -3   4   5       28.49       39.59     22.39 o
  -2   4   5       19.42       14.18     17.30 o
  -1   4   5     2657.22     2867.03     96.05 o
   0   4   5     2020.61     2044.60     49.43 o
   1   4   5      646.99      622.70     53.56 o
   2   4   5      404.52      396.90     14.20 o
   3   4   5       16.24       24.92     10.25 o
   4   4   5       94.19       83.66     15.33 o
   5   4   5      160.82      129.21     24.94 o
   6   4   5       97.96       83.14     26.51 o
   7   4   5       20.74       51.88     36.10 o
   8   4   5        0.88       -2.72     24.94 o
   9   4   5       15.26       61.71     40.75 o
  -7   5   5        0.51       -0.90     40.22 o
  -6   5   5       11.33       -7.58     34.53 o
  -5   5   5        8.25        0.47     23.79 o
  -4   5   5       11.23        8.37     24.69 o
  -3   5   5      106.62       86.00     27.59 o
  -2   5   5       54.98       57.04     22.42 o
  -1   5   5       17.16       23.43     11.91 o
   0   5   5      419.21      421.37     18.28 o
   1   5   5     2028.34     2041.95     92.26 o
   2   5   5      215.02      241.75     42.55 o
   3   5   5       56.84       70.51     11.25 o
   4   5   5       41.23       38.67     14.38 o
   5   5   5      109.52      107.83     24.53 o
   6   5   5      745.32      656.67     48.15 o
   7   5   5      544.30      548.35     65.48 o
   8   5   5       16.18       37.65     26.12 o
   9   5   5       12.79       30.83     26.41 o
  -6   6   5        7.53      -11.07     26.51 o
  -5   6   5       15.50       29.16     27.39 o
  -4   6   5      118.95      141.84     31.66 o
  -3   6   5       27.21       41.95     25.95 o
  -2   6   5        0.04       -1.30     20.29 o
  -1   6   5       35.13       11.53     13.44 o
   0   6   5      197.62      216.99     16.48 o
   1   6   5        0.25       30.72     30.45 o
   2   6   5       10.11       45.32     33.77 o
   3   6   5       35.57       -3.94     30.99 o
   4   6   5        1.88      -12.39     12.39 o
   5   6   5       43.06       49.22     23.41 o
   6   6   5      116.63      117.06     29.32 o
   7   6   5      113.25      135.05     40.08 o
   8   6   5        1.16       12.00     24.51 o
   9   6   5       21.61       52.94     32.11 o
  -6   7   5        4.31       15.32     40.22 o
  -5   7   5       39.63       51.79     30.05 o
  -4   7   5      121.48      133.01     31.60 o
  -3   7   5       40.20       70.58     38.96 o
  -2   7   5       40.15       55.37     24.40 o
  -1   7   5      897.80      952.63     35.19 o
   0   7   5      208.68      219.66     16.95 o
   1   7   5      258.03      248.29     49.26 o
   2   7   5      253.31      224.64     51.41 o
   3   7   5       11.94       17.65     34.57 o
   4   7   5      273.15      310.05     37.89 o
   5   7   5        1.91       -3.44     22.38 o
   6   7   5      431.00      463.35     41.91 o
   7   7   5       49.26       40.23     26.40 o
   8   7   5        1.13       19.63     27.04 o
   9   7   5        0.70       24.02     28.78 o
  -5   8   5       48.03       29.07     28.67 o
  -4   8   5        2.43      -17.22     23.69 o
  -3   8   5       16.62       66.37     45.32 o
  -2   8   5      133.41      104.54     26.63 o
  -1   8   5        2.21       -7.47     18.47 o
   0   8   5        2.25       12.83     17.71 o
   1   8   5      237.21      276.86     58.31 o
   2   8   5        0.11      -30.36     37.71 o
   3   8   5        1.03       12.99     40.40 o
   4   8   5       76.56       70.22     42.99 o
   5   8   5       46.86       73.38     24.36 o
   6   8   5        5.99       38.21     24.57 o
   7   8   5        7.92       13.35     42.28 o
   8   8   5       16.06      -10.39     43.17 o
  -4   9   5        4.31      -23.56     23.56 o
  -3   9   5       18.19       49.50     26.25 o
  -2   9   5      116.53      133.27     26.01 o
  -1   9   5        1.36       20.86     17.38 o
   0   9   5       89.25      111.96     50.07 o
   1   9   5       82.16      118.50     51.59 o
   2   9   5      175.02      126.12     52.40 o
   3   9   5       10.92      -25.26     39.32 o
   4   9   5        6.03       22.03     42.10 o
   5   9   5        8.88       25.80     39.68 o
   6   9   5       19.57       45.32     46.22 o
   7   9   5        4.45      -34.22     39.32 o
   8   9   5       14.22        5.02     45.05 o
  -3  10   5        5.24       -4.12     43.80 o
  -2  10   5       14.44       38.96     47.38 o
  -1  10   5      393.53      407.19     69.87 o
   0  10   5       19.97      -17.65     40.49 o
   1  10   5       74.90       54.37     46.49 o
   2  10   5      135.71       94.41     48.64 o
   3  10   5       22.45       22.84     43.44 o
   4  10   5       42.00       65.83     49.26 o
   5  10   5       26.42       15.41     44.43 o
   6  10   5        0.01      -17.82     42.37 o
   7  10   5       24.79       35.47     50.07 o
  -2  11   5       61.21       54.55     49.00 o
  -1  11   5        0.06       -4.48     44.16 o
   0  11   5        0.63      -29.74     41.65 o
   1  11   5       37.31        6.18     46.67 o
   2  11   5       97.84       55.53     49.53 o
   3  11   5      116.34      138.92     59.21 o
   4  11   5       82.02      113.58     57.50 o
   5  11   5       18.51       62.97     49.53 o
   6  11   5       16.34       -0.36     48.46 o
   0  12   5       22.49        0.72     49.71 o
   1  12   5       18.78        0.63     50.88 o
   2  12   5        6.42        3.13     48.19 o
   3  12   5       24.94       94.05     55.00 o
   4  12   5      142.12      151.46     63.42 o
   5  12   5        4.70       21.50     50.16 o
  -3 -12   6        4.85       25.17     44.96 o
  -2 -12   6       17.42       27.77     45.68 o
  -1 -12   6       57.68       72.19     47.74 o
   0 -12   6        1.38       37.50     28.99 o
   1 -12   6        0.18       17.11     43.26 o
  -5 -11   6        0.62      -27.68     51.77 o
  -4 -11   6       76.94       27.86     54.46 o
  -3 -11   6       72.83       77.55     36.20 o
  -2 -11   6       47.05       15.50     29.14 o
  -1 -11   6       54.02       56.78     29.50 o
   0 -11   6        0.36       -8.70     25.23 o
   1 -11   6        1.43       35.93     26.07 o
   2 -11   6       35.21       40.31     42.37 o
   3 -11   6       11.39       19.44     41.38 o
  -6 -10   6        7.95      -16.03     47.47 o
  -5 -10   6       10.20      -43.89     43.89 o
  -4 -10   6       70.62      -22.30     47.29 o
  -3 -10   6       68.28       -1.25     44.34 o
  -2 -10   6      157.30      188.62     37.46 o
  -1 -10   6       81.11      100.97     31.81 o
   0 -10   6      100.03      105.77     50.25 o
   1 -10   6      175.70      236.00     36.84 o
   2 -10   6        4.05       29.12     22.77 o
   3 -10   6        0.01       16.75     39.05 o
   4 -10   6        8.20       -3.22     38.25 o
  -7  -9   6        9.39       27.95     49.44 o
  -6  -9   6       86.64      160.51     61.71 o
  -5  -9   6        2.32        0.18     47.11 o
  -4  -9   6      236.66      203.51     59.39 o
  -3  -9   6      144.86       79.00     48.28 o
  -2  -9   6      396.20      391.16     63.24 o
  -1  -9   6        2.83       21.38     26.97 o
   0  -9   6      213.32      164.14     32.59 o
   1  -9   6       12.57      -11.36     21.13 o
   2  -9   6       31.32       17.75     21.43 o
   3  -9   6        0.60       -7.17     32.78 o
   4  -9   6       56.48       69.24     43.89 o
   5  -9   6       13.65       29.29     42.73 o
  -7  -8   6        1.60       -1.34     43.17 o
  -6  -8   6       55.37       -4.21     42.73 o
  -5  -8   6      160.16      117.52     55.35 o
  -4  -8   6      201.61      250.98     61.62 o
  -3  -8   6      186.03      201.80     55.98 o
  -2  -8   6      404.96      397.70     65.21 o
  -1  -8   6       22.71       24.18     42.01 o
   0  -8   6      555.71      580.36     47.13 o
   1  -8   6       71.38       85.69     26.85 o
   2  -8   6       17.09      -11.10     20.60 o
   3  -8   6       90.24       65.51     21.23 o
   4  -8   6      221.65      173.59     53.29 o
   5  -8   6        1.38       39.23     39.86 o
   6  -8   6        7.22        5.82     38.96 o
  -7  -7   6        0.22       19.17     47.02 o
  -6  -7   6        0.20      -19.97     43.80 o
  -5  -7   6       18.39       59.03     43.89 o
  -4  -7   6        0.97      -17.29     47.38 o
  -3  -7   6      342.59      363.30     65.39 o
  -2  -7   6       46.56       69.33     46.67 o
  -1  -7   6       29.34       12.63     39.68 o
   0  -7   6       10.26       16.30     37.17 o
   1  -7   6      130.53      133.51     27.39 o
   2  -7   6        0.13       24.01     20.51 o
   3  -7   6      424.31      428.00     35.00 o
   4  -7   6      227.99      226.35     54.19 o
   5  -7   6        7.06       58.58     43.08 o
   6  -7   6       84.12       73.18     48.46 o
  -8  -6   6       15.41       36.37     52.49 o
  -7  -6   6       32.03       40.13     49.98 o
  -6  -6   6      136.15      115.64     55.27 o
  -5  -6   6      159.62      167.77     58.49 o
  -4  -6   6      247.28      231.90     57.95 o
  -3  -6   6       10.20       46.49     41.47 o
  -2  -6   6       32.56       -3.85     39.86 o
  -1  -6   6      214.77      188.91     47.02 o
   0  -6   6      272.87      334.55     51.59 o
   1  -6   6      159.22      204.49     46.40 o
   2  -6   6       96.71      135.22     23.78 o
   3  -6   6       91.45      119.02     15.06 o
   4  -6   6       66.29       34.66     38.25 o
   5  -6   6      172.36      139.46     49.71 o
   6  -6   6       11.77       13.53     39.32 o
   7  -6   6        9.88       20.60     46.67 o
  -8  -5   6        0.46       17.91     48.37 o
  -7  -5   6      123.37      126.21     56.25 o
  -6  -5   6        4.55       -1.25     41.20 o
  -5  -5   6        4.33      -26.69     43.98 o
  -4  -5   6       24.28       23.29     42.37 o
  -3  -5   6       91.50       67.09     41.20 o
  -2  -5   6       21.93       -2.78     33.77 o
  -1  -5   6       22.42        5.91     31.80 o
   0  -5   6      333.06      350.22     48.55 o
   1  -5   6       17.40       -5.46     27.95 o
   2  -5   6      144.36      134.52     15.42 o
   3  -5   6      186.77      199.23     16.40 o
   4  -5   6        4.41       23.83     35.83 o
   5  -5   6      117.19      180.75     50.07 o
   6  -5   6       17.54       32.60     42.10 o
   7  -5   6        6.26       19.71     43.80 o
  -8  -4   6       75.43      127.46     58.85 o
  -7  -4   6      234.17      185.86     60.55 o
  -6  -4   6        1.87       43.08     43.08 o
  -5  -4   6       75.66       46.22     46.22 o
  -4  -4   6     1047.47     1060.25     86.62 o
  -3  -4   6       68.82       66.64     39.59 o
  -2  -4   6      115.40      130.24     40.49 o
  -1  -4   6      287.52      236.47     43.08 o
   0  -4   6       15.27       10.57     29.20 o
   1  -4   6      268.31      270.35     25.04 o
   2  -4   6        0.00      -10.65     10.65 o
   3  -4   6     2361.40     2416.98    108.11 o
   4  -4   6        0.77      -12.63     26.24 o
   5  -4   6       34.37       17.29     33.50 o
   6  -4   6       18.92       -1.43     35.29 o
   7  -4   6       18.12       -2.42     39.14 o
   8  -4   6        0.08       40.93     46.40 o
  -8  -3   6        3.53        4.03     47.47 o
  -7  -3   6       12.66       12.18     41.38 o
  -6  -3   6      308.26      347.36     67.18 o
  -5  -3   6      291.67      269.61     59.12 o
  -4  -3   6        0.11      -34.22     34.22 o
  -3  -3   6       78.04       67.63     36.54 o
  -2  -3   6        2.41      -16.12     28.04 o
  -1  -3   6       94.43      130.77     33.41 o
   0  -3   6     1892.71     1988.12     82.76 o
   1  -3   6      177.39      218.97     21.73 o
   2  -3   6        1.04        6.09     11.62 o
   3  -3   6        0.53      -24.63     24.63 o
   4  -3   6      892.88      886.21     74.43 o
   5  -3   6       19.60       14.51     35.56 o
   6  -3   6        5.90      -13.35     33.23 o
   7  -3   6       50.24       16.48     36.46 o
   8  -3   6        0.73      -14.78     37.44 o
  -8  -2   6        0.00       23.20     47.29 o
  -7  -2   6       94.52       87.15     52.67 o
  -6  -2   6        6.41       32.42     41.02 o
  -5  -2   6      125.65      111.61     49.17 o
  -4  -2   6        7.48      -17.12     20.28 o
  -3  -2   6      135.70      119.21     25.08 o
  -2  -2   6      949.22     1007.16     47.13 o
  -1  -2   6       10.10        6.14     16.51 o
   0  -2   6       25.02       10.40     12.49 o
   1  -2   6       61.81       52.63     12.12 o
   2  -2   6      789.76      772.87     20.45 o
   3  -2   6       36.25       28.84     28.04 o
   4  -2   6      199.80      204.85     43.08 o
   5  -2   6      104.29       82.41     39.23 o
   6  -2   6       18.48       35.20     38.87 o
   7  -2   6       23.49        9.67     31.35 o
   8  -2   6        2.08       33.23     45.95 o
  -8  -1   6       15.29       45.50     47.02 o
  -7  -1   6        9.69      -30.63     38.25 o
  -6  -1   6      535.74      603.80     52.66 o
  -5  -1   6       18.76       10.13     24.46 o
  -4  -1   6        7.19        3.97     22.19 o
  -3  -1   6      504.16      483.19     38.00 o
  -2  -1   6      230.51      279.00     28.63 o
  -1  -1   6     3892.12     3934.25     73.97 o
   0  -1   6     1367.06     1434.20     31.60 o
   1  -1   6      201.59      200.44     14.50 o
   2  -1   6      880.67      865.54     22.91 o
   3  -1   6        0.36        1.95      6.68 o
   4  -1   6     1529.27     1405.91     79.00 o
   5  -1   6       18.31       12.45     32.07 o
   6  -1   6       71.43       67.63     40.67 o
   7  -1   6       48.58       15.32     38.69 o
   8  -1   6       29.85       63.95     48.55 o
   9  -1   6       10.02       14.60     44.43 o
  -8   0   6       45.77       36.46     48.91 o
  -7   0   6       18.10       13.61     44.79 o
  -6   0   6      273.26      268.88     39.38 o
  -5   0   6      342.80      365.35     41.90 o
  -4   0   6       61.95       50.02     25.01 o
  -3   0   6      125.73      133.10     25.23 o
  -2   0   6       31.92       40.59     19.88 o
  -1   0   6      173.89      173.10     18.26 o
   0   0   6     2426.36     2489.64     38.59 o
   1   0   6      231.70      155.02     67.47 o
   2   0   6        0.20        3.11      9.18 o
   3   0   6      366.86      323.90     17.45 o
   4   0   6        8.76        0.15     12.72 o
   5   0   6      229.10      244.09     24.81 o
   6   0   6      600.67      569.64     26.99 o
   7   0   6       13.71       58.67     39.86 o
   8   0   6        0.07      -12.00     36.28 o
   9   0   6        0.61        7.26     39.95 o
  -8   1   6      123.08      111.07     61.54 o
  -7   1   6        4.12       25.22     39.81 o
  -6   1   6      349.13      359.84     44.17 o
  -5   1   6        0.43      -11.11     24.83 o
  -4   1   6      154.48      158.99     30.94 o
  -3   1   6      291.25      253.17     30.60 o
  -2   1   6      235.48      272.10     28.36 o
  -1   1   6        5.74       15.28     12.92 o
   0   1   6     2442.59     2266.45     46.24 o
   1   1   6       36.60       52.36     11.83 o
   2   1   6        0.56        7.18      9.26 o
   3   1   6      251.48      244.29     17.93 o
   4   1   6     1756.79     1739.58     48.60 o
   5   1   6       90.74      101.05     21.22 o
   6   1   6      190.82      199.94     28.49 o
   7   1   6       52.25       18.12     22.02 o
   8   1   6      171.83      132.39     53.56 o
   9   1   6        4.72       46.40     48.64 o
  -7   2   6      140.23      157.97     37.45 o
  -6   2   6       35.03       45.59     29.16 o
  -5   2   6        0.03       -8.62     24.78 o
  -4   2   6       39.78       44.90     25.61 o
  -3   2   6       40.98       40.17     21.84 o
  -2   2   6      516.99      590.70     37.08 o
  -1   2   6      116.19      117.95     15.92 o
   0   2   6     6216.62     6200.83     98.07 o
   1   2   6        4.31       10.35     11.74 o
   2   2   6      390.99      379.62     20.81 o
   3   2   6        5.81       10.45     11.25 o
   4   2   6      616.03      647.50     34.80 o
   5   2   6      570.79      548.32     36.88 o
   6   2   6      118.73      150.02     28.75 o
   7   2   6       58.55       31.74     23.99 o
   8   2   6        0.28       -6.69     22.15 o
   9   2   6       29.15       52.67     49.44 o
  -7   3   6        4.60       41.03     30.86 o
  -6   3   6       34.68       59.24     30.47 o
  -5   3   6       58.83       34.94     28.53 o
  -4   3   6       65.08       37.80     26.73 o
  -3   3   6        6.42       12.74     21.19 o
  -2   3   6       59.76       69.98     21.30 o
  -1   3   6      270.44      292.53     21.28 o
   0   3   6      429.09      497.16     22.84 o
   1   3   6      290.89      305.25     17.28 o
   2   3   6        7.62        3.62     10.06 o
   3   3   6       15.03       -1.28     11.03 o
   4   3   6      339.66      334.63     27.82 o
   5   3   6       18.60       -0.80     18.55 o
   6   3   6      101.12      134.37     35.78 o
   7   3   6       37.66       30.38     23.47 o
   8   3   6       74.91       94.13     28.77 o
   9   3   6        1.72      -37.98     38.52 o
  -7   4   6       12.70       40.16     30.39 o
  -6   4   6       52.66       50.72     31.16 o
  -5   4   6      347.43      336.49     41.82 o
  -4   4   6        0.22       -1.43     25.77 o
  -3   4   6      116.36      107.39     28.27 o
  -2   4   6       32.62       27.67     20.62 o
  -1   4   6        4.19       10.53     11.88 o
   0   4   6     2591.07     2671.11     59.98 o
   1   4   6      239.29      236.87     14.45 o
   2   4   6      210.84      203.41     13.45 o
   3   4   6      299.04      284.92     18.39 o
   4   4   6        0.51      -11.85     11.85 o
   5   4   6       47.14       26.03     20.34 o
   6   4   6       66.40       71.00     26.19 o
   7   4   6      367.25      354.63     39.65 o
   8   4   6       11.99       -0.21     24.45 o
   9   4   6        1.52       -8.42     39.77 o
  -6   5   6       37.17       53.75     31.06 o
  -5   5   6        6.41        6.11     25.79 o
  -4   5   6      682.87      656.04     52.06 o
  -3   5   6      821.72      788.85     50.65 o
  -2   5   6       81.51       57.52     24.12 o
  -1   5   6       45.85       51.64     14.40 o
   0   5   6      276.08      277.84     23.25 o
   1   5   6      458.45      496.85     56.61 o
   2   5   6      111.86       55.89     33.77 o
   3   5   6       14.92       13.43      9.70 o
   4   5   6      283.00      284.79     21.05 o
   5   5   6       33.02       33.54     21.63 o
   6   5   6       69.71       43.54     24.61 o
   7   5   6        0.66        6.79     23.87 o
   8   5   6        0.05      -24.99     30.99 o
   9   5   6       26.48       53.52     28.21 o
  -6   6   6        1.08       -3.68     27.44 o
  -5   6   6        0.39       -4.02     27.63 o
  -4   6   6      219.98      210.05     35.94 o
  -3   6   6       38.53       57.00     27.50 o
  -2   6   6      324.34      311.94     34.97 o
  -1   6   6        4.82       -1.52     13.41 o
   0   6   6       35.15       24.82     11.62 o
   1   6   6      333.05      332.76     52.22 o
   2   6   6      316.78      336.79     52.85 o
   3   6   6      192.36      152.63     44.16 o
   4   6   6        0.01       -7.09     14.99 o
   5   6   6      258.88      260.14     41.07 o
   6   6   6      280.62      307.18     36.60 o
   7   6   6      287.84      286.73     43.13 o
   8   6   6        0.08       -9.46     23.74 o
   9   6   6        1.98       10.32     25.83 o
  -5   7   6        7.69       28.50     28.87 o
  -4   7   6        5.38      -21.06     22.65 o
  -3   7   6        0.30        5.33     23.20 o
  -2   7   6      510.72      482.19     42.88 o
  -1   7   6        4.58      -11.90     14.61 o
   0   7   6       88.93       85.57     13.97 o
   1   7   6       57.52       61.09     41.47 o
   2   7   6        1.86       20.78     37.98 o
   3   7   6       10.06        6.27     34.75 o
   4   7   6      245.73      179.59     52.58 o
   5   7   6       24.58       35.18     22.78 o
   6   7   6        6.65       43.06     24.09 o
   7   7   6      177.49      183.99     34.46 o
   8   7   6      132.54      121.93     34.93 o
  -5   8   6       10.50        9.29     27.95 o
  -4   8   6       33.66       20.36     26.61 o
  -3   8   6       72.89      118.85     29.41 o
  -2   8   6      554.62      581.37     44.95 o
  -1   8   6       46.77       70.84     22.61 o
   0   8   6       58.52       62.69     19.48 o
   1   8   6       29.67      -29.56     40.04 o
   2   8   6      130.24       91.81     49.71 o
   3   8   6      344.52      311.08     62.16 o
   4   8   6       92.31       70.76     46.67 o
   5   8   6       54.41       39.77     44.61 o
   6   8   6      220.66      231.90     58.49 o
   7   8   6       88.39       67.72     49.89 o
   8   8   6       38.48       -8.06     47.11 o
  -4   9   6       21.85        3.76     44.34 o
  -3   9   6       17.37       25.56     24.46 o
  -2   9   6       32.62       37.44     42.81 o
  -1   9   6      103.13      106.14     49.35 o
   0   9   6      631.60      488.61     73.09 o
   1   9   6       62.88       86.44     48.28 o
   2   9   6       12.05       14.06     42.19 o
   3   9   6      294.52      301.50     63.42 o
   4   9   6      105.99      104.62     50.07 o
   5   9   6       76.43       36.54     42.10 o
   6   9   6       36.73       61.27     50.25 o
   7   9   6       61.02       85.72     51.77 o
   8   9   6       64.70      118.59     60.19 o
  -3  10   6        5.63      -20.33     45.05 o
  -2  10   6        6.91       -2.15     43.08 o
  -1  10   6       82.20       38.34     46.31 o
   0  10   6       25.43       25.80     45.59 o
   1  10   6       16.30        9.85     43.44 o
   2  10   6        0.98      -24.90     39.23 o
   3  10   6       14.27        0.36     43.44 o
   4  10   6      115.83      123.16     55.53 o
   5  10   6       94.77      132.30     57.68 o
   6  10   6       17.29      109.28     57.33 o
   7  10   6        3.45       66.91     53.47 o
  -2  11   6        7.83      -29.29     47.83 o
  -1  11   6       21.90       18.54     45.95 o
   0  11   6       42.43       19.62     49.08 o
   1  11   6       30.07       28.21     49.00 o
   2  11   6       24.48       38.16     49.53 o
   3  11   6      140.66      154.69     60.82 o
   4  11   6       76.67       42.37     49.80 o
   5  11   6        2.09        1.07     41.29 o
   6  11   6        0.41       -8.87     47.83 o
   0  12   6        0.22       24.54     51.50 o
   1  12   6        5.09       -6.45     45.59 o
   2  12   6       25.44       98.62     54.37 o
   3  12   6       46.68       25.35     51.23 o
   4  12   6        0.87       63.68     52.76 o
   5  12   6        0.53        4.03     47.11 o
  -3 -12   7        0.30       46.49     47.92 o
  -2 -12   7        5.97       48.20     33.74 o
  -1 -12   7        4.32       14.39     28.21 o
   0 -12   7       12.31       21.88     30.50 o
  -4 -11   7       12.17      -24.36     48.19 o
  -3 -11   7        1.89      -18.63     45.95 o
  -2 -11   7       10.30      -16.65     27.84 o
  -1 -11   7       37.31       30.03     35.16 o
   0 -11   7       12.93       -5.78     42.41 o
   1 -11   7       38.96       67.30     29.62 o
   2 -11   7        3.10       14.51     41.02 o
  -5 -10   7       19.64        8.96     53.47 o
  -4 -10   7       21.67       20.78     52.13 o
  -3 -10   7       24.83      -22.66     43.62 o
  -2 -10   7       14.16        6.45     43.53 o
  -1 -10   7        8.85       -0.91     26.18 o
   0 -10   7      272.51      316.75     41.04 o
   1 -10   7       64.04       75.35     28.15 o
   2 -10   7       13.00        9.67     34.40 o
   3 -10   7        0.00       19.53     40.49 o
   4 -10   7       24.88       59.30     45.50 o
  -6  -9   7       15.26       24.18     52.76 o
  -5  -9   7       56.12       38.34     54.01 o
  -4  -9   7       88.53       30.63     51.06 o
  -3  -9   7      162.76      158.72     53.65 o
  -2  -9   7      155.45      166.24     53.92 o
  -1  -9   7       43.24       88.05     44.88 o
   0  -9   7      164.78      128.36     31.14 o
   1  -9   7      141.64      123.76     28.83 o
   2  -9   7       22.95       30.91     22.47 o
   3  -9   7       65.87       63.60     44.34 o
   4  -9   7        0.45       23.11     41.02 o
   5  -9   7       10.81       30.99     46.13 o
  -7  -8   7        1.01       48.37     54.46 o
  -6  -8   7        1.67        8.51     47.65 o
  -5  -8   7       34.97       43.80     50.52 o
  -4  -8   7        1.54      -43.44     43.44 o
  -3  -8   7       55.30       68.25     52.13 o
  -2  -8   7       19.54      -13.35     46.40 o
  -1  -8   7       48.51       75.42     48.37 o
   0  -8   7      267.67      256.44     56.43 o
   1  -8   7       15.48        1.32     23.35 o
   2  -8   7      688.68      645.62     44.66 o
   3  -8   7       27.48       63.24     40.49 o
   4  -8   7       42.40       39.14     41.38 o
   5  -8   7      126.08      139.37     53.65 o
   6  -8   7        0.06        9.32     39.14 o
  -7  -7   7        3.91       54.73     53.47 o
  -6  -7   7        9.24       15.05     43.44 o
  -5  -7   7       59.32       16.84     43.17 o
  -4  -7   7        6.81       16.84     43.98 o
  -3  -7   7        4.47      -41.92     41.92 o
  -2  -7   7      118.94      127.91     53.83 o
  -1  -7   7        6.54       15.14     42.64 o
   0  -7   7       22.55        2.69     36.46 o
   1  -7   7       90.30      101.68     26.57 o
   2  -7   7      296.04      328.03     45.32 o
   3  -7   7       44.34       41.87     19.04 o
   4  -7   7       77.01      101.84     46.67 o
   5  -7   7       26.64      -17.65     33.05 o
   6  -7   7      158.66      224.11     62.16 o
  -7  -6   7      160.88      198.85     64.58 o
  -6  -6   7       14.43        1.79     44.61 o
  -5  -6   7      349.94      412.83     75.87 o
  -4  -6   7        6.96      -31.44     46.49 o
  -3  -6   7        5.79       30.01     44.88 o
  -2  -6   7      288.89      217.66     56.07 o
  -1  -6   7      431.19      452.51     60.10 o
   0  -6   7       15.71       18.54     35.02 o
   1  -6   7       55.04       81.69     37.89 o
   2  -6   7       33.04       45.10     19.97 o
   3  -6   7      321.57      271.44     26.89 o
   4  -6   7       17.59        4.84     35.83 o
   5  -6   7       32.32       -1.88     35.65 o
   6  -6   7       12.74       10.39     40.13 o
   7  -6   7        5.91      -35.38     35.38 o
  -8  -5   7        0.03       59.30     53.47 o
  -7  -5   7       87.21       84.91     54.64 o
  -6  -5   7       36.48       39.50     47.47 o
  -5  -5   7       92.76       89.84     52.31 o
  -4  -5   7      248.32      230.02     61.36 o
  -3  -5   7        0.53        9.40     41.20 o
  -2  -5   7      142.80      119.67     43.80 o
  -1  -5   7      243.45      318.34     51.95 o
   0  -5   7       78.14       47.74     35.02 o
   1  -5   7        0.74       21.14     31.62 o
   2  -5   7       22.47       22.86     15.71 o
   3  -5   7       56.24       58.78     11.55 o
   4  -5   7        0.05      -15.85     33.23 o
   5  -5   7      118.37      166.96     51.41 o
   6  -5   7       19.37       -8.87     34.93 o
   7  -5   7       10.05      -21.32     38.34 o
  -8  -4   7       96.83       84.82     57.24 o
  -7  -4   7       13.05       60.55     50.52 o
  -6  -4   7        0.23        3.76     41.56 o
  -5  -4   7        0.00       13.35     45.32 o
  -4  -4   7       54.26       72.19     47.47 o
  -3  -4   7       83.09       37.98     40.40 o
  -2  -4   7      162.55      195.98     45.77 o
  -1  -4   7        0.09       -5.55     30.81 o
   0  -4   7      130.00      160.06     39.59 o
   1  -4   7       17.09       10.75     28.66 o
   2  -4   7     1295.87     1306.13     42.22 o
   3  -4   7      273.54      268.44     49.62 o
   4  -4   7       87.27       66.37     40.93 o
   5  -4   7        9.64       27.41     36.63 o
   6  -4   7        0.73       -3.76     32.87 o
   7  -4   7        6.96       31.17     42.01 o
   8  -4   7       19.82       20.60     44.43 o
  -8  -3   7        7.96       19.97     48.55 o
  -7  -3   7      146.11      136.51     59.39 o
  -6  -3   7        2.34       17.02     38.52 o
  -5  -3   7      274.55      228.50     60.37 o
  -4  -3   7       61.72       62.52     43.98 o
  -3  -3   7      556.64      531.53     43.15 o
  -2  -3   7        3.38      -18.74     18.74 o
  -1  -3   7      445.67      506.21     38.00 o
   0  -3   7     1342.21     1525.95     72.46 o
   1  -3   7      601.79      596.16     35.25 o
   2  -3   7      220.05      243.23     22.22 o
   3  -3   7      169.21      149.94     39.32 o
   4  -3   7       51.38       55.71     33.77 o
   5  -3   7      151.22      164.99     45.23 o
   6  -3   7        5.63      -14.15     33.50 o
   7  -3   7      118.40      100.59     46.13 o
   8  -3   7       25.33       83.57     48.46 o
  -8  -2   7       13.78      -14.78     46.67 o
  -7  -2   7      298.24      277.58     68.97 o
  -6  -2   7        2.56       24.01     43.35 o
  -5  -2   7       25.20       16.74     28.36 o
  -4  -2   7       28.58       10.11     23.85 o
  -3  -2   7      666.93      732.62     45.52 o
  -2  -2   7      522.18      611.96     42.28 o
  -1  -2   7       99.04       99.92     22.93 o
   0  -2   7       50.30       61.03     17.71 o
   1  -2   7     1720.85     1738.42     37.79 o
   2  -2   7      353.89      362.45     18.47 o
   3  -2   7      568.39      637.57     60.10 o
   4  -2   7      114.39      137.31     41.65 o
   5  -2   7       25.49       44.79     33.68 o
   6  -2   7      129.83      167.59     49.71 o
   7  -2   7        8.14       21.14     38.43 o
   8  -2   7        0.35       24.27     42.99 o
  -8  -1   7       97.46      111.16     60.46 o
  -7  -1   7      409.71      448.39     79.36 o
  -6  -1   7       36.91       33.97     28.56 o
  -5  -1   7       17.42       15.23     26.34 o
  -4  -1   7       95.22      105.94     30.04 o
  -3  -1   7      402.14      422.99     37.47 o
  -2  -1   7      350.86      370.85     32.82 o
  -1  -1   7      132.46      144.63     23.86 o
   0  -1   7      518.15      420.67     31.46 o
   1  -1   7       27.99       21.20     12.42 o
   2  -1   7     1346.13     1281.61     30.00 o
   3  -1   7       18.11       18.69      9.07 o
   4  -1   7      177.37      245.69     45.23 o
   5  -1   7        3.11       14.51     31.80 o
   6  -1   7      114.12      120.47     45.59 o
   7  -1   7       27.53       36.37     39.41 o
   8  -1   7       54.02       58.04     47.92 o
   9  -1   7       26.79       50.52     50.25 o
  -8   0   7        9.27       22.21     49.26 o
  -7   0   7      155.34      194.24     40.41 o
  -6   0   7       54.84       54.89     29.36 o
  -5   0   7       74.78       61.14     29.34 o
  -4   0   7       60.81       59.97     27.77 o
  -3   0   7      131.12      119.46     26.88 o
  -2   0   7      169.57      156.10     26.00 o
  -1   0   7      431.63      481.69     34.52 o
   0   0   7      300.51      343.35     23.26 o
   1   0   7      695.45      629.22     23.35 o
   2   0   7      220.90      223.01     18.43 o
   3   0   7      228.88      257.84     17.49 o
   4   0   7      328.91      364.45     25.38 o
   5   0   7       84.62      110.65     19.60 o
   6   0   7        5.20       -4.08     16.98 o
   7   0   7      128.25      146.27     49.26 o
   8   0   7        0.37       30.45     42.10 o
   9   0   7       54.40       59.39     50.43 o
  -7   1   7       81.61       92.60     36.02 o
  -6   1   7       32.52       52.92     30.41 o
  -5   1   7        3.75       -1.19     25.99 o
  -4   1   7       37.55       44.70     26.59 o
  -3   1   7      373.09      360.08     36.45 o
  -2   1   7      115.63      120.95     24.48 o
  -1   1   7     1970.44     1943.85     57.10 o
   0   1   7     2283.54     2173.40     44.52 o
   1   1   7      422.13      420.33     24.61 o
   2   1   7      540.22      481.13     41.45 o
   3   1   7       61.88       58.39     13.14 o
   4   1   7     1940.13     1862.44     52.03 o
   5   1   7      388.24      376.62     35.16 o
   6   1   7       68.77       72.05     23.00 o
   7   1   7       12.93       14.63     22.53 o
   8   1   7        3.50      -25.17     35.74 o
   9   1   7        6.41       36.90     49.35 o
  -7   2   7       17.41       43.40     32.24 o
  -6   2   7       10.02        2.90     27.21 o
  -5   2   7        0.06       -9.30     25.29 o
  -4   2   7      106.26       95.34     30.12 o
  -3   2   7        3.95      -18.97     27.90 o
  -2   2   7       64.42      120.02     24.89 o
  -1   2   7       73.11       85.83     21.80 o
   0   2   7      267.98      273.43     20.14 o
   1   2   7      597.18      640.34     25.98 o
   2   2   7      332.33      332.11     21.04 o
   3   2   7      102.43       96.89     16.16 o
   4   2   7       87.09      103.21     20.45 o
   5   2   7      193.13      211.51     27.23 o
   6   2   7      211.59      204.78     29.76 o
   7   2   7        9.26       17.38     27.32 o
   8   2   7       16.64       70.76     43.53 o
   9   2   7       28.30       86.97     52.49 o
  -7   3   7       29.47       53.73     33.60 o
  -6   3   7      234.86      235.83     41.80 o
  -5   3   7        4.44       20.40     26.85 o
  -4   3   7      584.46      567.96     49.46 o
  -3   3   7      213.03      197.11     34.40 o
  -2   3   7      311.03      320.83     32.54 o
  -1   3   7        7.23        6.52     12.66 o
   0   3   7       96.78       84.35     15.12 o
   1   3   7      103.02      120.22     14.82 o
   2   3   7      699.47      744.53     26.37 o
   3   3   7       25.27       25.16     12.69 o
   4   3   7      129.72      160.91     23.02 o
   5   3   7        9.94       -0.97     18.68 o
   6   3   7       64.10       50.33     24.65 o
   7   3   7      400.52      407.64     48.37 o
   8   3   7       13.50       -1.93     23.88 o
   9   3   7        8.35       43.98     43.35 o
  -7   4   7        0.50       21.68     32.01 o
  -6   4   7        3.99        0.82     28.31 o
  -5   4   7       52.27       87.55     31.66 o
  -4   4   7       33.32       45.96     28.25 o
  -3   4   7      178.66      190.46     32.80 o
  -2   4   7      163.59      135.16     27.33 o
  -1   4   7      919.34      991.74     34.88 o
   0   4   7      321.24      347.12     21.81 o
   1   4   7        4.84       16.72     10.50 o
   2   4   7       53.15       59.22     11.45 o
   3   4   7      129.31      129.08     15.21 o
   4   4   7      220.58      203.18     19.99 o
   5   4   7       13.06       -4.69     18.77 o
   6   4   7      341.38      383.23     63.42 o
   7   4   7       11.94       31.15     24.19 o
   8   4   7        1.41       35.62     26.40 o
   9   4   7        0.84      -15.23     42.55 o
  -6   5   7        3.01       -9.55     27.92 o
  -5   5   7      165.12      270.93     77.34 o
  -4   5   7       74.94       94.92     30.51 o
  -3   5   7      123.61      115.46     31.47 o
  -2   5   7       73.22       59.65     26.20 o
  -1   5   7      128.11      148.42     19.13 o
   0   5   7       35.48       43.36     12.57 o
   1   5   7       14.39       17.33      7.96 o
   2   5   7        0.76      -14.24     27.68 o
   3   5   7       42.64       45.17     11.11 o
   4   5   7       13.28       16.13     13.69 o
   5   5   7       24.19       11.28     19.63 o
   6   5   7        0.01      -13.30     20.78 o
   7   5   7        5.72       16.28     23.55 o
   8   5   7        8.13       -6.28     24.92 o
   9   5   7        0.21       37.80     39.77 o
  -6   6   7        5.99        9.22     28.28 o
  -5   6   7      187.83      165.17     38.60 o
  -4   6   7       28.63       -2.34     24.45 o
  -3   6   7      187.87      181.42     33.17 o
  -2   6   7      719.77      713.42     48.91 o
  -1   6   7       20.36       18.43     14.73 o
   0   6   7      796.46      830.60     29.07 o
   1   6   7       18.29       33.77     38.16 o
   2   6   7      490.44      444.36     60.19 o
   3   6   7       13.98      -19.88     34.31 o
   4   6   7       28.69       36.92     20.53 o
   5   6   7        4.97      -25.35     36.81 o
   6   6   7       16.16       49.89     41.02 o
   7   6   7      134.81      118.50     48.73 o
   8   6   7       54.28       51.33     28.54 o
   9   6   7       17.29       22.36     27.04 o
  -5   7   7        3.73       29.38     29.09 o
  -4   7   7       91.43       91.44     33.00 o
  -3   7   7        1.88       35.52     26.30 o
  -2   7   7      300.59      303.78     45.10 o
  -1   7   7        1.67        9.50     21.30 o
   0   7   7      536.97      552.20     24.64 o
   1   7   7        6.53      -31.08     31.08 o
   2   7   7      857.38      728.30     78.91 o
   3   7   7        1.66      -17.02     37.71 o
   4   7   7        0.05       42.46     43.44 o
   5   7   7      154.52      159.93     27.01 o
   6   7   7      105.28       95.45     27.23 o
   7   7   7       13.40       19.01     24.93 o
   8   7   7      190.64      217.39     61.54 o
  -4   8   7        4.85       10.75     27.35 o
  -3   8   7       89.74       62.95     31.26 o
  -2   8   7       17.42       61.21     23.90 o
  -1   8   7        0.00       20.25     18.78 o
   0   8   7      179.91      149.23     54.28 o
   1   8   7       19.52       27.41     45.59 o
   2   8   7       21.09        6.63     41.74 o
   3   8   7       29.26       12.99     45.59 o
   4   8   7       45.43       76.58     48.55 o
   5   8   7       14.34       16.93     41.02 o
   6   8   7       50.97       46.31     46.49 o
   7   8   7       38.50       -2.24     41.92 o
   8   8   7        8.39       18.72     45.32 o
  -4   9   7        8.79       49.71     49.00 o
  -3   9   7       25.02       48.55     47.83 o
  -2   9   7        0.27       16.57     46.67 o
  -1   9   7       10.14        1.79     42.46 o
   0   9   7       72.03       71.66     48.01 o
   1   9   7       48.97       48.01     45.77 o
   2   9   7      792.29      699.19     86.08 o
   3   9   7      170.05      163.20     54.37 o
   4   9   7       27.27       86.08     48.73 o
   5   9   7       14.23       82.41     49.08 o
   6   9   7       49.63       33.50     48.28 o
   7   9   7        0.10       -3.05     43.71 o
  -3  10   7        6.41      -14.69     42.99 o
  -2  10   7        6.73       21.59     49.62 o
  -1  10   7        0.07       13.70     46.76 o
   0  10   7      125.47      118.86     55.00 o
   1  10   7       14.35       49.53     48.10 o
   2  10   7       99.55      148.87     57.06 o
   3  10   7        2.58      -15.32     41.02 o
   4  10   7       56.14      100.86     53.65 o
   5  10   7       16.09       -4.84     41.29 o
   6  10   7        3.63       27.05     48.19 o
   7  10   7       25.41        3.13     46.58 o
  -1  11   7       14.15       35.83     48.55 o
   0  11   7       50.01       81.15     51.32 o
   1  11   7      282.58      272.56     70.49 o
   2  11   7       17.25      -33.50     37.26 o
   3  11   7        0.43       14.96     46.67 o
   4  11   7        0.03      -37.44     42.01 o
   5  11   7       95.67       78.64     53.92 o
   6  11   7       27.76       88.23     56.52 o
   0  12   7       33.44       32.60     55.09 o
   1  12   7      243.87      289.14     74.79 o
   2  12   7       13.29       -3.94     47.83 o
   3  12   7        0.86       31.53     52.76 o
   4  12   7        0.78      -21.32     47.29 o
  -2 -12   8       10.85      -14.96     53.92 o
  -1 -12   8        0.72       -8.19     38.34 o
   0 -12   8        1.47        8.39     41.78 o
  -4 -11   8       31.90       54.01     56.43 o
  -3 -11   8       31.69       28.39     52.22 o
  -2 -11   8       39.02       76.19     34.52 o
  -1 -11   8       37.39       13.85     34.22 o
   0 -11   8        7.49       20.64     27.96 o
   1 -11   8        6.48       -8.24     24.98 o
   2 -11   8       42.56       24.63     43.80 o
  -5 -10   8        3.31      -24.01     50.61 o
  -4 -10   8      136.88      107.31     58.94 o
  -3 -10   8       62.04        9.58     45.41 o
  -2 -10   8       47.57      -11.64     42.28 o
  -1 -10   8       33.51       41.45     31.13 o
   0 -10   8        0.72       21.93     30.05 o
   1 -10   8        0.39        0.59     27.41 o
   2 -10   8       29.96       61.09     44.70 o
   3 -10   8       72.25       76.49     46.76 o
   4 -10   8        4.80      -31.89     35.56 o
  -6  -9   8       24.55       43.08     53.74 o
  -5  -9   8       36.55       14.60     52.85 o
  -4  -9   8        1.98       -9.85     46.40 o
  -3  -9   8        6.41       46.67     48.28 o
  -1  -9   8        8.02       35.83     41.38 o
   0  -9   8       34.66       43.89     27.82 o
   1  -9   8        2.82       19.62     22.70 o
   2  -9   8       19.56        7.56     28.75 o
   3  -9   8        7.07       -5.11     37.53 o
   4  -9   8       19.33        9.05     42.10 o
   5  -9   8       26.94       20.69     42.73 o
  -6  -8   8      110.67      111.34     57.24 o
  -5  -8   8       28.82      -14.69     46.04 o
  -4  -8   8       36.20       66.46     52.94 o
  -3  -8   8       83.33      105.07     54.46 o
  -2  -8   8      249.97      245.87     59.65 o
  -1  -8   8       36.20       32.87     47.56 o
   0  -8   8      289.47      255.73     56.88 o
   1  -8   8       10.79       16.73     22.45 o
   2  -8   8      177.38      213.29     30.68 o
   3  -8   8        0.87       -7.17     33.59 o
   4  -8   8       19.38        1.79     36.90 o
   5  -8   8       64.59       78.37     50.97 o
  -7  -7   8       25.17       10.75     51.86 o
  -6  -7   8        9.26      -23.29     45.41 o
  -5  -7   8       20.19      -26.87     41.83 o
  -4  -7   8      201.36      209.15     59.56 o
  -3  -7   8      385.71      359.54     68.88 o
  -2  -7   8        6.14       15.41     47.83 o
  -1  -7   8       44.88       18.45     43.17 o
   0  -7   8      130.26      123.25     47.20 o
   1  -7   8       14.13        2.60     36.46 o
   2  -7   8       12.95       22.14     21.01 o
   3  -7   8       33.29       32.25     23.56 o
   4  -7   8       15.48       24.45     37.26 o
   5  -7   8       30.04      -10.57     37.08 o
   6  -7   8        2.22      -23.11     38.87 o
  -7  -6   8      270.42      260.20     70.04 o
  -6  -6   8        0.05       15.59     52.04 o
  -5  -6   8      144.35      171.53     55.80 o
  -4  -6   8      113.27      118.77     56.25 o
  -3  -6   8      171.27      157.56     56.25 o
  -2  -6   8       22.36       17.38     43.71 o
  -1  -6   8       34.74       55.44     45.14 o
   0  -6   8        3.48       -0.45     39.68 o
   1  -6   8        1.02      -13.53     33.68 o
   2  -6   8      126.55      142.23     24.54 o
   3  -6   8       16.81       17.09     17.15 o
   4  -6   8      134.28      128.44     47.02 o
   5  -6   8      146.38      144.93     51.77 o
   6  -6   8       45.61       97.81     48.46 o
   7  -6   8        0.20        0.36     41.65 o
  -7  -5   8        3.22      -30.36     42.55 o
  -6  -5   8      218.57      232.44     66.28 o
  -5  -5   8      489.96      502.76     77.93 o
  -4  -5   8       20.32       22.30     46.67 o
  -3  -5   8        0.27      -18.63     40.84 o
  -2  -5   8       29.52       71.84     44.07 o
  -1  -5   8      794.91      732.15     73.63 o
   0  -5   8       20.80       25.17     36.10 o
   1  -5   8      160.22      196.25     46.67 o
   2  -5   8        0.53       -8.73     16.72 o
   3  -5   8        3.23        9.98     10.78 o
   4  -5   8        3.94       13.08     37.26 o
   5  -5   8       39.25        2.87     36.99 o
   6  -5   8       81.04       48.10     45.23 o
   7  -5   8        6.62        8.24     40.58 o
  -8  -4   8       49.91       67.54     57.41 o
  -7  -4   8        0.00       25.80     49.17 o
  -6  -4   8      116.59      129.70     56.97 o
  -5  -4   8      421.31      478.22     76.05 o
  -4  -4   8       38.87       16.93     47.56 o
  -3  -4   8       20.84       -3.13     35.74 o
  -2  -4   8      182.76      206.82     49.71 o
  -1  -4   8      403.19      405.76     53.38 o
   0  -4   8      897.03      864.27     72.55 o
   1  -4   8       25.45        5.55     31.08 o
   2  -4   8      411.76      409.18     29.63 o
   3  -4   8       11.06       22.00     13.60 o
   4  -4   8       96.24       92.89     42.46 o
   5  -4   8      113.41       73.27     43.71 o
   6  -4   8      213.11      216.13     57.06 o
   7  -4   8       31.71       50.79     46.22 o
   8  -4   8        0.00        3.67     42.01 o
  -8  -3   8        4.20       -7.17     50.61 o
  -7  -3   8      140.57      138.57     60.55 o
  -6  -3   8       24.80       57.33     47.65 o
  -5  -3   8        1.62       19.80     46.40 o
  -4  -3   8      841.64      792.70     85.72 o
  -3  -3   8       54.22       36.47     25.72 o
  -2  -3   8      490.70      484.90     41.70 o
  -1  -3   8       84.57       70.55     23.46 o
   0  -3   8        1.74       14.95     17.88 o
   1  -3   8       89.10       68.47     18.65 o
   2  -3   8     1018.75     1074.88     40.22 o
   3  -3   8        3.08       -2.12     11.26 o
   4  -3   8       35.37       27.41     34.31 o
   5  -3   8      199.24      189.44     49.53 o
   6  -3   8        1.23       -3.94     34.22 o
   7  -3   8        2.84       -8.87     37.53 o
   8  -3   8        7.34       36.19     46.40 o
  -8  -2   8        8.54       57.95     56.34 o
  -7  -2   8        0.20      -40.13     40.13 o
  -6  -2   8       31.85       19.44     45.23 o
  -5  -2   8      465.55      468.35     49.92 o
  -4  -2   8        0.01        5.20     26.26 o
  -3  -2   8      152.78      169.83     30.70 o
  -2  -2   8      785.96      821.27     47.95 o
  -1  -2   8     1157.67     1155.96     50.96 o
   0  -2   8       69.43       84.71     20.92 o
   1  -2   8      949.30      952.64     41.35 o
   2  -2   8      155.44      136.09     15.33 o
   3  -2   8       54.55       48.20     13.14 o
   4  -2   8       39.18       42.81     33.77 o
   5  -2   8      104.16      126.92     45.77 o
   6  -2   8       21.99       35.38     33.95 o
   7  -2   8       56.26      113.31     49.53 o
   8  -2   8       22.50       20.60     43.44 o
  -8  -1   8        0.33       44.61     55.44 o
  -7  -1   8        0.49        6.72     42.46 o
  -6  -1   8        2.88        9.16     27.86 o
  -5  -1   8      122.38       97.73     34.41 o
  -4  -1   8        4.23       14.96     25.53 o
  -3  -1   8        0.23      -10.75     21.19 o
  -2  -1   8      410.55      374.19     35.94 o
  -1  -1   8      264.00      283.16     30.96 o
   0  -1   8     3230.48     3387.65     72.63 o
   1  -1   8        5.28        5.71     16.41 o
   2  -1   8      621.87      649.58     26.35 o
   3  -1   8      493.97      500.60     21.19 o
   4  -1   8        0.49      -11.54     14.06 o
   5  -1   8      104.49      135.61     42.99 o
   6  -1   8        3.82        3.31     34.66 o
   7  -1   8        5.37       -4.93     35.29 o
   8  -1   8       13.03       11.29     42.10 o
   9  -1   8       32.56       92.97     57.50 o
  -7   0   8       50.08       69.98     34.84 o
  -6   0   8       50.03        6.81     28.67 o
  -5   0   8      112.11       82.11     31.89 o
  -4   0   8      122.66      121.92     32.29 o
  -3   0   8      293.82      288.58     35.89 o
  -2   0   8        8.15        0.44     18.67 o
  -1   0   8      280.91      309.70     30.95 o
   0   0   8       74.52       99.53     21.37 o
   1   0   8      673.39      658.09     36.19 o
   2   0   8      475.35      493.43     24.81 o
   3   0   8       18.48       -2.65     11.01 o
   4   0   8      239.99      244.24     36.05 o
   5   0   8        9.27       32.01     17.39 o
   6   0   8      642.08      671.32     35.23 o
   7   0   8       80.97      107.66     47.02 o
   8   0   8        0.07       10.75     40.84 o
   9   0   8        4.91      -36.01     36.01 o
  -7   1   8       90.90      146.68     39.38 o
  -6   1   8       41.47       12.39     28.66 o
  -5   1   8        2.81      -15.28     26.08 o
  -4   1   8      236.38      209.82     36.47 o
  -3   1   8        2.00       12.08     22.19 o
  -2   1   8       95.11      116.18     26.03 o
  -1   1   8     2238.94     2356.20     66.49 o
   0   1   8     2331.34     2377.84     75.73 o
   1   1   8      300.08      312.17     22.13 o
   2   1   8      135.59      122.09     28.44 o
   3   1   8      148.68      161.59     22.19 o
   4   1   8      154.48      166.09     28.17 o
   5   1   8      707.73      675.23     38.43 o
   6   1   8       48.28       26.35     21.35 o
   7   1   8       31.02       34.24     21.09 o
   8   1   8       11.26        5.46     38.52 o
   9   1   8       19.54       -7.17     40.93 o
  -7   2   8        1.16        0.94     36.37 o
  -6   2   8      660.98      718.04     60.07 o
  -5   2   8        3.11      -23.40     25.58 o
  -4   2   8      907.56      998.11     63.08 o
  -3   2   8      172.70      173.06     32.50 o
  -2   2   8      229.52      240.26     31.16 o
  -1   2   8       13.55        5.03     18.04 o
   0   2   8      472.20      564.09     28.27 o
   1   2   8      922.73      899.74     31.72 o
   2   2   8      344.24      326.55     23.52 o
   3   2   8      133.01      113.28     37.31 o
   4   2   8       57.99       50.58     19.73 o
   5   2   8      214.84      204.13     27.34 o
   6   2   8      687.56      654.22     43.59 o
   7   2   8      563.75      559.82     43.28 o
   8   2   8       69.23      120.38     50.97 o
   9   2   8        9.04       24.90     45.32 o
  -7   3   8       20.66       53.99     33.40 o
  -6   3   8       80.43       36.70     32.19 o
  -5   3   8       50.58       40.48     29.88 o
  -4   3   8       11.32      -12.00     26.68 o
  -3   3   8        8.25       18.04     25.10 o
  -2   3   8       23.88       -2.74     21.23 o
  -1   3   8       18.74        7.32     19.54 o
   0   3   8     2485.30     2705.48     91.10 o
   1   3   8        1.02       11.35     12.93 o
   2   3   8      330.71      317.68     21.56 o
   3   3   8      124.72      144.21     17.84 o
   4   3   8       94.26      100.61     21.95 o
   5   3   8        8.53       10.06     19.79 o
   6   3   8      456.31      464.49     40.89 o
   7   3   8        1.50       -4.17     21.24 o
   8   3   8        0.38        0.89     24.30 o
   9   3   8       33.74       13.79     48.46 o
  -6   4   8        6.76       18.31     30.37 o
  -5   4   8      182.93      231.17     39.77 o
  -4   4   8      247.31      258.44     40.05 o
  -3   4   8      402.79      378.76     41.28 o
  -2   4   8       32.21       50.19     25.56 o
  -1   4   8     1265.02     1219.47     51.75 o
   0   4   8       31.22       24.00     13.89 o
   1   4   8      203.32      195.92     17.06 o
   2   4   8      289.84      280.81     21.47 o
   3   4   8       13.32        2.24     12.08 o
   4   4   8       19.16       37.04     18.09 o
   5   4   8        0.63       -3.26     18.42 o
   6   4   8       10.74        3.27     27.05 o
   7   4   8        1.86       15.85     23.14 o
   8   4   8        1.60        0.09     23.52 o
   9   4   8        1.06      -24.09     39.50 o
  -6   5   8       30.94       31.99     31.23 o
  -5   5   8        0.66       18.14     29.81 o
  -4   5   8       84.93       90.36     31.21 o
  -3   5   8       90.02       66.42     33.50 o
  -2   5   8       11.96       -0.84     24.54 o
  -1   5   8       69.52       64.27     24.54 o
   0   5   8       17.28       22.64     13.41 o
   1   5   8        0.83       -2.86     15.61 o
   2   5   8      816.25      849.33     22.23 o
   3   5   8      219.02      222.60     17.39 o
   4   5   8      206.16      189.06     20.33 o
   5   5   8       42.46       24.13     21.76 o
   6   5   8        0.00       -3.60     21.85 o
   7   5   8       12.89      -13.88     22.06 o
   8   5   8        0.69        9.17     25.30 o
   9   5   8        0.19       -8.69     41.02 o
  -5   6   8       15.29        4.90     28.61 o
  -4   6   8        6.52       12.72     26.66 o
  -3   6   8       13.13        2.73     25.09 o
  -2   6   8       16.99       -5.22     23.95 o
  -1   6   8      344.30      350.58     35.72 o
   0   6   8      161.84      154.36     17.58 o
   1   6   8      291.69      332.58     57.24 o
   2   6   8      158.05      109.81     45.41 o
   3   6   8      472.72      482.70     64.76 o
   4   6   8       53.70       40.63     17.09 o
   5   6   8       14.82       14.43     19.53 o
   6   6   8       63.76       64.29     26.38 o
   7   6   8        0.24       -8.25     23.20 o
   8   6   8       75.08      106.14     47.56 o
   9   6   8       30.66       88.69     31.48 o
  -5   7   8        3.04      -26.20     27.40 o
  -4   7   8       12.74       17.27     30.10 o
  -3   7   8      171.01      142.45     32.13 o
  -2   7   8      203.67      184.71     32.78 o
  -1   7   8       36.75       52.27     24.70 o
   0   7   8        4.43        8.04     12.58 o
   1   7   8      283.69      207.54     56.61 o
   2   7   8      148.55      135.16     50.52 o
   3   7   8       73.69       40.13     42.46 o
   4   7   8        2.35      -39.86     39.86 o
   5   7   8       81.78       30.40     28.04 o
   6   7   8      154.50      124.62     28.20 o
   7   7   8        2.65       34.57     42.64 o
   8   7   8       13.87       12.72     44.34 o
  -4   8   8        0.63        2.05     37.22 o
  -3   8   8       12.64       25.44     26.58 o
  -2   8   8        8.32       29.72     22.76 o
  -1   8   8       14.61       23.29     18.38 o
   0   8   8       97.29       91.18     49.35 o
   1   8   8      379.35      354.79     66.55 o
   2   8   8      204.48      130.42     54.46 o
   3   8   8      212.88      207.72     54.46 o
   4   8   8       33.60       64.13     46.40 o
   5   8   8        9.77       10.21     40.93 o
   6   8   8       68.45       34.13     48.01 o
   7   8   8       55.36       92.26     51.15 o
   8   8   8       45.09       61.54     51.15 o
  -3   9   8        0.51       -9.23     43.53 o
  -2   9   8        9.24      -16.21     41.92 o
  -1   9   8       24.43       23.56     45.86 o
   0   9   8      110.44      145.73     55.18 o
   1   9   8       82.26       88.05     49.35 o
   2   9   8        9.86       26.87     43.53 o
   3   9   8       32.19       22.30     44.34 o
   4   9   8        1.74       -1.43     44.07 o
   5   9   8        3.50       -8.78     41.65 o
   6   9   8        0.05      -10.30     42.10 o
   7   9   8        1.09        0.09     42.55 o
  -2  10   8       31.00       29.11     48.55 o
  -1  10   8       90.69       72.28     53.47 o
   0  10   8        4.59      -12.00     45.41 o
   1  10   8       93.96       42.55     51.06 o
   2  10   8      126.42      124.77     56.25 o
   3  10   8        0.01       -6.99     44.52 o
   4  10   8       34.03        7.61     48.10 o
   5  10   8       44.87       24.09     48.64 o
   6  10   8      140.33      263.52     69.51 o
   7  10   8       19.96       56.43     53.29 o
  -1  11   8       27.04       71.30     58.76 o
   0  11   8       16.39      -13.79     48.64 o
   1  11   8       52.73       27.05     49.35 o
   2  11   8       65.30       64.40     54.73 o
   3  11   8        2.97      -10.03     47.83 o
   4  11   8       24.10       37.08     51.59 o
   5  11   8       20.61       41.02     52.76 o
   6  11   8       34.43      -13.79     44.96 o
   1  12   8        1.44       43.80     52.40 o
   2  12   8       60.90       21.32     51.50 o
   3  12   8        0.04       -4.12     46.67 o
   4  12   8       25.72       40.40     49.08 o
  -3 -11   9        0.09       22.93     49.89 o
  -2 -11   9        1.19      -35.47     44.07 o
  -1 -11   9       35.81       63.47     33.82 o
   0 -11   9        0.01      -24.79     25.22 o
   1 -11   9        7.20      -10.84     41.29 o
   2 -11   9        8.63       32.51     44.79 o
  -5 -10   9       15.07        2.60     55.89 o
  -4 -10   9       20.07       28.75     56.97 o
  -3 -10   9       14.61      -29.02     48.73 o
  -2 -10   9      195.52      240.86     63.77 o
  -1 -10   9      103.31       99.42     53.21 o
   0 -10   9       17.91       14.89     26.90 o
   1 -10   9        1.66       10.83     24.85 o
   2 -10   9       10.62       -2.60     37.08 o
   3 -10   9       10.46       12.72     41.56 o
  -5  -9   9       35.76       18.36     55.44 o
  -4  -9   9       35.48       54.73     56.07 o
  -3  -9   9        2.08      -32.34     47.83 o
  -2  -9   9       26.03       43.17     50.97 o
  -1  -9   9        7.84       18.27     41.38 o
   0  -9   9       30.05      -18.36     39.32 o
   1  -9   9       21.37       24.75     25.02 o
   2  -9   9        0.00        1.97     36.63 o
   3  -9   9       23.24       13.88     39.32 o
   4  -9   9      116.22      103.72     52.49 o
  -6  -8   9       25.90       49.62     56.61 o
  -5  -8   9        0.03      -32.16     46.67 o
  -4  -8   9       67.44      119.58     58.85 o
  -3  -8   9      134.34       50.43     49.00 o
  -2  -8   9      602.48      457.17     71.84 o
  -1  -8   9        0.12        3.13     40.40 o
   0  -8   9      247.50      260.02     59.74 o
   1  -8   9       16.56       61.00     42.10 o
   2  -8   9      379.00      339.62     35.36 o
   3  -8   9       31.30       61.00     43.17 o
   4  -8   9       18.11       -4.30     35.83 o
   5  -8   9        3.23        6.18     41.74 o
  -7  -7   9       25.75       15.76     50.52 o
  -6  -7   9       38.59      -11.02     46.49 o
  -5  -7   9       22.55       45.23     51.41 o
  -4  -7   9      327.19      334.73     67.09 o
  -3  -7   9      686.09      688.17     85.72 o
  -2  -7   9        4.02        8.96     50.88 o
  -1  -7   9       69.06       83.93     49.26 o
   0  -7   9      616.23      681.10     83.75 o
   1  -7   9        4.68       16.66     40.58 o
   2  -7   9      612.62      681.76     44.52 o
   3  -7   9      290.87      265.13     57.15 o
   4  -7   9       59.61       48.10     42.28 o
   5  -7   9       26.67       31.71     44.43 o
   6  -7   9       14.12      -36.63     36.63 o
  -7  -6   9        5.65      -26.42     45.32 o
  -6  -6   9        0.08       46.49     55.98 o
  -5  -6   9       21.76        1.88     44.25 o
  -4  -6   9       28.23       42.37     48.55 o
  -3  -6   9        8.09       32.78     51.06 o
  -2  -6   9       12.15       10.21     46.58 o
  -1  -6   9        0.74       11.82     41.20 o
   0  -6   9        0.44       36.54     41.74 o
   1  -6   9      142.05      105.96     45.14 o
   2  -6   9       61.48       78.46     42.73 o
   3  -6   9      113.45      122.06     21.91 o
   4  -6   9      148.73      196.43     53.38 o
   5  -6   9        6.93       43.80     42.99 o
   6  -6   9       73.32      102.02     54.19 o
   7  -6   9        0.00       -1.16     43.71 o
  -7  -5   9        8.23       19.62     53.21 o
  -6  -5   9       10.35        2.15     47.65 o
  -5  -5   9       95.36       74.25     54.64 o
  -4  -5   9        0.29      -10.66     45.77 o
  -3  -5   9       18.78       60.28     50.25 o
  -2  -5   9        7.77       -0.45     43.35 o
  -1  -5   9        8.31       22.66     42.19 o
   0  -5   9       22.33       45.68     41.74 o
   1  -5   9      237.52      251.60     53.03 o
   2  -5   9        0.05       -3.58     30.63 o
   3  -5   9      182.91      172.52     16.00 o
   4  -5   9       44.39       42.73     40.31 o
   5  -5   9       29.01       58.94     42.73 o
   6  -5   9        7.85        0.72     39.95 o
   7  -5   9       75.57      147.61     58.67 o
  -7  -4   9        1.72       42.01     53.83 o
  -6  -4   9      195.96      196.79     62.70 o
  -5  -4   9        3.15       -3.13     46.40 o
  -4  -4   9       11.67      -44.79     47.02 o
  -3  -4   9        1.12        1.88     44.88 o
  -2  -4   9      199.11      208.07     49.89 o
  -1  -4   9      277.89      280.54     55.00 o
   0  -4   9      481.13      463.17     59.39 o
   1  -4   9        0.58       10.48     33.95 o
   2  -4   9      101.17      128.33     23.45 o
   3  -4   9      334.49      327.31     27.63 o
   4  -4   9        8.99       51.15     39.95 o
   5  -4   9      240.59      234.32     56.43 o
   6  -4   9       23.32      -12.90     33.68 o
   7  -4   9       39.64        7.61     40.49 o
   8  -4   9      137.08      103.54     58.04 o
  -7  -3   9      125.36      167.59     61.80 o
  -6  -3   9      419.28      391.34     75.60 o
  -5  -3   9       35.94       64.31     51.06 o
  -4  -3   9      282.48      290.28     42.05 o
  -3  -3   9      306.25      287.07     39.81 o
  -2  -3   9       28.76       24.18     23.85 o
  -1  -3   9      353.98      332.95     35.25 o
   0  -3   9      141.92      180.74     28.00 o
   1  -3   9      803.56      710.67     40.17 o
   2  -3   9      257.12      257.45     26.86 o
   3  -3   9       62.34       58.20     16.55 o
   4  -3   9      107.54      102.92     44.88 o
   5  -3   9       10.98      -11.73     36.63 o
   6  -3   9        5.28      -31.17     31.17 o
   7  -3   9       52.12       54.10     44.07 o
   8  -3   9       33.78       22.75     44.96 o
  -7  -2   9        4.75        4.30     48.91 o
  -6  -2   9       72.30       74.52     47.83 o
  -5  -2   9        2.45        0.56     28.86 o
  -4  -2   9       24.72       22.37     29.16 o
  -3  -2   9       55.16       75.44     28.58 o
  -2  -2   9      102.83      105.77     31.13 o
  -1  -2   9      132.88      137.55     28.48 o
   0  -2   9        0.71       25.69     19.85 o
   1  -2   9      384.69      360.96     31.12 o
   2  -2   9      302.98      295.96     21.90 o
   3  -2   9      515.41      514.60     22.45 o
   4  -2   9      192.79      250.35     51.41 o
   5  -2   9      169.85      224.38     53.21 o
   6  -2   9       95.67       57.59     40.31 o
   7  -2   9       11.14       29.11     41.74 o
   8  -2   9       33.81       43.71     47.74 o
  -7  -1   9        0.94      -13.53     44.16 o
  -6  -1   9       10.69       26.15     30.98 o
  -5  -1   9       96.20      100.80     34.64 o
  -4  -1   9      183.21      133.37     35.49 o
  -3  -1   9      215.91      213.54     34.55 o
  -2  -1   9      853.00      878.40     51.91 o
  -1  -1   9     1113.81     1114.26     52.82 o
   0  -1   9     2635.92     2667.66     70.28 o
   1  -1   9       63.58       70.55     20.16 o
   2  -1   9     1108.07     1120.78     50.88 o
   3  -1   9       99.01      109.20     16.45 o
   4  -1   9       54.91       51.71     11.76 o
   5  -1   9       37.79       16.57     36.46 o
   6  -1   9       17.95       14.69     38.34 o
   7  -1   9        0.29       18.36     37.53 o
   8  -1   9        0.38       85.18     48.64 o
  -7   0   9       56.46       88.80     38.11 o
  -6   0   9      130.38      157.11     39.89 o
  -5   0   9      330.17      342.02     46.35 o
  -4   0   9       33.79       23.93     28.75 o
  -3   0   9        0.61       -6.07     24.09 o
  -2   0   9       28.42       42.63     23.37 o
  -1   0   9      590.99      557.79     41.45 o
   0   0   9      159.46      202.02     27.82 o
   1   0   9       77.35       75.10     21.12 o
   2   0   9      357.97      410.38     31.44 o
   3   0   9      143.93      163.97     17.52 o
   4   0   9        1.36        5.89     12.40 o
   5   0   9        0.04      -13.93     17.03 o
   6   0   9       13.93        0.49     18.45 o
   7   0   9        6.75       40.67     38.87 o
   8   0   9       30.20       64.94     47.11 o
   9   0   9      120.84      160.78     63.42 o
  -7   1   9       29.41       49.57     34.81 o
  -6   1   9      146.55      156.94     39.87 o
  -5   1   9       64.56       69.59     30.88 o
  -4   1   9       34.17       27.17     28.88 o
  -3   1   9      247.15      214.71     35.68 o
  -2   1   9        3.91       14.39     22.93 o
  -1   1   9       12.53       28.05     20.86 o
   0   1   9     2269.33     2237.68     75.87 o
   1   1   9     1772.65     1762.21     55.40 o
   2   1   9       73.83       66.63     19.66 o
   3   1   9       82.06       98.13     21.83 o
   4   1   9      483.87      460.61     53.74 o
   5   1   9      101.40       82.10     23.20 o
   6   1   9      163.14      156.78     27.41 o
   7   1   9       32.45       58.94     40.67 o
   8   1   9       16.10      -24.72     37.08 o
   9   1   9       10.44       -6.18     39.14 o
  -7   2   9        8.03        7.81     31.36 o
  -6   2   9       98.39      145.15     38.99 o
  -5   2   9        6.38      -19.99     24.97 o
  -4   2   9        1.58      -17.59     28.60 o
  -3   2   9        2.83       -8.68     23.62 o
  -2   2   9       18.32       17.15     23.43 o
  -1   2   9     1081.50     1092.26     70.49 o
   0   2   9      112.89      122.48     25.23 o
   1   2   9       94.86       83.36     16.93 o
   2   2   9       22.02       10.38     18.01 o
   3   2   9        1.20       20.86     18.22 o
   4   2   9      277.90      321.66     69.06 o
   5   2   9        0.23      -17.66     19.24 o
   6   2   9       64.24       22.56     23.34 o
   7   2   9       17.02       31.58     23.46 o
   8   2   9        7.71        3.49     38.16 o
   9   2   9       30.47       58.76     49.44 o
  -6   3   9       78.72      114.36     38.28 o
  -5   3   9       69.86       77.29     32.38 o
  -4   3   9        1.04       -8.42     27.12 o
  -3   3   9        7.91       12.36     26.53 o
  -2   3   9      412.22      477.88     42.57 o
  -1   3   9      169.02      166.97     27.61 o
   0   3   9       40.99       32.73     20.91 o
   1   3   9      189.57      178.66     19.84 o
   2   3   9      408.68      402.87     25.67 o
   3   3   9       81.62       76.92     20.62 o
   4   3   9        3.98        3.38     17.92 o
   5   3   9        2.03      -17.90     19.55 o
   6   3   9        7.99       25.11     24.15 o
   7   3   9       43.95       24.44     24.34 o
   8   3   9       24.90       53.03     43.98 o
   9   3   9        6.38      -24.18     37.17 o
  -6   4   9        0.32       14.19     31.53 o
  -5   4   9      112.24      104.08     35.31 o
  -4   4   9      321.97      338.87     43.94 o
  -3   4   9      769.18      853.78     58.66 o
  -2   4   9       31.65       36.65     25.77 o
  -1   4   9        0.10       -7.44     23.29 o
   0   4   9      258.68      292.89     23.43 o
   1   4   9       33.99       53.29     15.77 o
   2   4   9       69.34       69.92     15.64 o
   3   4   9        0.57        7.76     14.44 o
   4   4   9      114.85      127.45     23.88 o
   5   4   9       12.12       -5.59     19.45 o
   6   4   9       16.08       -9.25     21.64 o
   7   4   9        0.55      -10.18     22.39 o
   8   4   9        8.37       40.24     24.97 o
   9   4   9       12.11       28.04     44.79 o
  -6   5   9        3.07        4.72     32.18 o
  -5   5   9        0.01        4.75     28.78 o
  -4   5   9       13.60       15.53     28.28 o
  -3   5   9       13.49       19.24     26.85 o
  -2   5   9       15.17       16.35     25.55 o
  -1   5   9     1440.64     1526.06     61.72 o
   0   5   9      614.42      599.63     30.05 o
   1   5   9       22.80       20.22     13.82 o
   2   5   9     1090.02     1104.30     29.02 o
   3   5   9       54.85       66.28     14.77 o
   4   5   9      151.53      144.80     19.57 o
   5   5   9      115.62      136.83     27.31 o
   6   5   9      195.96      163.58     30.11 o
   7   5   9       10.09        0.36     23.10 o
   8   5   9        0.01       12.77     26.51 o
   9   5   9        0.05      -40.04     40.04 o
  -5   6   9       27.43       51.00     33.14 o
  -4   6   9        7.04       13.32     29.02 o
  -3   6   9        2.23       17.22     25.38 o
  -2   6   9     1031.35      968.40    101.57 o
  -1   6   9       41.39       24.84     24.71 o
   0   6   9      643.87      646.88     30.20 o
   1   6   9      457.55      492.62     29.05 o
   2   6   9       58.41       58.76     44.07 o
   3   6   9        8.98       -0.36     38.69 o
   4   6   9      215.31      226.57     20.04 o
   5   6   9       20.35        8.92     19.84 o
   6   6   9       44.47       22.19     21.77 o
   7   6   9       16.87       24.74     25.26 o
   8   6   9       40.54       39.02     28.90 o
  -5   7   9       29.18       30.50     32.29 o
  -4   7   9        0.00       -7.14     27.59 o
  -3   7   9        7.35       16.20     25.69 o
  -2   7   9      205.83      216.21     34.11 o
  -1   7   9       29.20       40.12     25.12 o
   0   7   9      589.85      569.12     39.25 o
   1   7   9       28.25       13.35     44.07 o
   2   7   9      257.20      266.38     60.73 o
   3   7   9      263.03      234.23     59.83 o
   4   7   9       32.06       13.44     41.65 o
   5   7   9       22.99       51.77     44.79 o
   6   7   9       72.51       66.91     45.50 o
   7   7   9       19.36       35.29     46.13 o
   8   7   9        0.93       27.95     41.29 o
  -4   8   9        9.33       36.48     29.91 o
  -3   8   9      101.73       77.53     28.38 o
  -2   8   9        8.80        1.58     31.44 o
  -1   8   9        6.53       -5.02     40.93 o
   0   8   9      114.84      122.35     51.86 o
   1   8   9        0.02       12.72     42.73 o
   2   8   9        0.94      -21.68     41.02 o
   3   8   9       20.79      -35.92     39.05 o
   4   8   9      159.45      196.52     57.33 o
   5   8   9       45.16      101.30     50.88 o
   6   8   9        1.91        6.00     42.10 o
   7   8   9       18.32       60.82     49.26 o
   8   8   9        3.08       -3.76     41.11 o
  -3   9   9        8.75      -41.20     41.20 o
  -2   9   9       20.28        0.63     48.64 o
  -1   9   9        5.00      -36.99     40.40 o
   0   9   9      190.61      180.13     59.39 o
   1   9   9       69.50       43.62     48.19 o
   2   9   9       92.85      123.34     52.40 o
   3   9   9        2.34       -1.25     41.56 o
   4   9   9       55.13       49.00     49.44 o
   5   9   9       18.55       59.12     50.43 o
   6   9   9        9.00       28.04     47.20 o
   7   9   9       17.14       38.78     48.19 o
  -2  10   9        0.18      -14.15     46.22 o
  -1  10   9       31.20       -4.30     44.16 o
   0  10   9        0.11       60.10     51.77 o
   1  10   9       23.57       -1.88     47.11 o
   2  10   9       37.87       37.44     49.80 o
   3  10   9       26.52       38.61     46.94 o
   4  10   9       20.08       76.94     53.29 o
   5  10   9       37.41       29.56     52.22 o
   6  10   9       28.03       62.07     52.76 o
   0  11   9        0.09      -23.47     46.67 o
   1  11   9        8.68       32.34     52.31 o
   2  11   9        6.01       18.45     51.95 o
   3  11   9       13.72      -18.54     47.29 o
   4  11   9        6.35        0.36     47.65 o
   5  11   9       12.54      -15.23     46.76 o
  -3 -11  10        0.69      -35.02     49.71 o
  -2 -11  10       11.70       -3.67     45.14 o
  -1 -11  10        1.09       -3.87     28.57 o
   0 -11  10        0.78      -12.02     24.60 o
   1 -11  10        7.85       -0.54     43.62 o
  -4 -10  10       87.70       60.19     59.92 o
  -3 -10  10        3.29      -43.35     43.35 o
  -2 -10  10        3.28      -42.46     42.46 o
  -1 -10  10       26.98      -12.36     45.05 o
   0 -10  10       31.32       44.02     31.04 o
   1 -10  10       80.98       94.65     31.22 o
   2 -10  10        6.36        4.21     36.72 o
   3 -10  10        0.90       15.23     45.86 o
  -5  -9  10      145.96      151.20     67.45 o
  -4  -9  10       15.52      -27.23     48.91 o
  -3  -9  10        8.85      -47.83     47.83 o
  -2  -9  10        0.49       26.69     51.32 o
  -1  -9  10        4.62      -16.30     40.93 o
   0  -9  10       12.27        6.27     40.22 o
   1  -9  10       83.18      106.15     30.94 o
   2  -9  10      235.15      203.68     57.24 o
   3  -9  10       11.62       22.03     40.93 o
   4  -9  10       31.62       83.03     52.13 o
  -6  -8  10        4.08      -20.06     53.38 o
  -5  -8  10        0.50       -2.78     52.85 o
  -4  -8  10       90.27       23.74     55.62 o
  -3  -8  10        4.09      -19.80     43.80 o
  -2  -8  10       71.40       10.30     48.82 o
  -1  -8  10      123.73      101.04     52.58 o
   0  -8  10      125.12       70.76     50.16 o
   1  -8  10       68.34       83.84     45.59 o
   2  -8  10        3.22       10.36     19.41 o
   3  -8  10       10.67       10.66     38.16 o
   4  -8  10      140.72      126.74     52.58 o
   5  -8  10        3.31       -9.67     41.02 o
  -6  -7  10       24.04        3.94     49.71 o
  -5  -7  10       41.50       37.89     53.47 o
  -4  -7  10       31.39        7.70     47.38 o
  -3  -7  10       81.04       79.81     52.31 o
  -2  -7  10       14.60       24.36     51.23 o
  -1  -7  10      158.86      203.95     60.10 o
   0  -7  10      122.75      122.80     52.31 o
   1  -7  10       22.65       25.98     42.28 o
   2  -7  10      387.50      377.81     65.21 o
   3  -7  10        8.56       -2.06     36.28 o
   4  -7  10      251.66      194.91     56.25 o
   5  -7  10        1.33       36.10     46.58 o
   6  -7  10        0.02       -5.02     44.25 o
  -6  -6  10       43.93       30.81     51.59 o
  -5  -6  10        8.40       28.93     49.53 o
  -4  -6  10      181.77      230.73     63.68 o
  -3  -6  10      301.06      235.75     65.03 o
  -2  -6  10       19.16       41.20     49.89 o
  -1  -6  10      250.29      244.53     61.18 o
   0  -6  10      133.30      119.94     46.67 o
   1  -6  10      191.49      166.87     52.67 o
   2  -6  10        1.38       16.03     39.86 o
   3  -6  10        0.74       29.50     22.35 o
   4  -6  10      481.89      529.90     74.70 o
   5  -6  10       23.46       16.93     41.56 o
   6  -6  10       63.28       89.84     53.65 o
  -7  -5  10       83.74      116.62     66.10 o
  -6  -5  10        4.30       25.71     55.09 o
  -5  -5  10      196.19      181.20     59.39 o
  -4  -5  10      227.12      196.52     56.52 o
  -3  -5  10      935.41      877.26     95.30 o
  -2  -5  10      272.77      263.16     63.95 o
  -1  -5  10      298.15      255.99     56.07 o
   0  -5  10       33.41       21.68     42.73 o
   1  -5  10      137.53      152.90     50.34 o
   2  -5  10      750.08      767.89     79.09 o
   3  -5  10        8.85       -5.20     36.90 o
   4  -5  10       27.40       69.42     42.37 o
   5  -5  10      225.26      254.38     56.97 o
   6  -5  10       12.31      -15.23     38.34 o
   7  -5  10        9.58       27.86     45.14 o
  -7  -4  10        1.66       45.59     54.73 o
  -6  -4  10       43.69       53.12     54.37 o
  -5  -4  10      212.68      208.70     64.67 o
  -4  -4  10       40.94       47.74     46.13 o
  -3  -4  10       13.94      -27.41     46.04 o
  -2  -4  10       29.59       56.97     43.98 o
  -1  -4  10       24.07       -0.18     37.26 o
   0  -4  10       11.45       23.92     40.49 o
   1  -4  10       11.76       -1.88     37.08 o
   2  -4  10      307.59      296.93     55.18 o
   3  -4  10        2.31        1.43     17.19 o
   4  -4  10      171.93      196.43     52.67 o
   5  -4  10        6.30        6.27     36.63 o
   6  -4  10        0.36      -13.44     32.96 o
   7  -4  10        2.37       29.74     44.25 o
  -7  -3  10        4.84       13.61     52.04 o
  -6  -3  10      199.96      219.90     66.37 o
  -5  -3  10       42.24       64.94     51.86 o
  -4  -3  10        0.20       -1.09     30.37 o
  -3  -3  10       20.83       25.20     27.97 o
  -2  -3  10       60.11       61.40     28.75 o
  -1  -3  10       31.98       18.91     23.67 o
   0  -3  10       82.65      106.67     26.10 o
   1  -3  10       36.16        7.56     20.10 o
   2  -3  10      951.93      981.89     44.97 o
   3  -3  10      271.86      251.16     25.31 o
   4  -3  10      100.73       84.38     43.89 o
   5  -3  10      101.64      154.69     48.73 o
   6  -3  10        5.04       19.17     38.61 o
   7  -3  10        5.89      -30.72     33.32 o
   8  -3  10       15.06      -22.75     37.44 o
  -7  -2  10        3.12       10.84     47.20 o
  -6  -2  10      106.50      135.07     38.76 o
  -5  -2  10       78.64       91.26     35.31 o
  -4  -2  10      158.49      128.40     35.96 o
  -3  -2  10      423.87      459.80     47.37 o
  -2  -2  10      761.11      771.95     51.51 o
  -1  -2  10      611.24      633.56     46.56 o
   0  -2  10       40.65       28.23     21.81 o
   1  -2  10       19.91       36.09     20.89 o
   2  -2  10      111.55      138.28     23.73 o
   3  -2  10        0.16        2.95     12.45 o
   4  -2  10       58.85       67.43     14.42 o
   5  -2  10      116.32      101.30     47.83 o
   6  -2  10       85.56       70.49     43.53 o
   7  -2  10      105.12      129.97     52.76 o
   8  -2  10      119.38      209.60     62.79 o
  -7  -1  10       69.31      120.21     39.98 o
  -6  -1  10       35.02       71.06     35.83 o
  -5  -1  10       40.22       35.22     31.10 o
  -4  -1  10        1.21        9.70     29.11 o
  -3  -1  10       47.28       31.98     29.70 o
  -2  -1  10      359.68      370.58     40.57 o
  -1  -1  10      339.65      360.07     36.19 o
   0  -1  10      191.78      204.60     29.78 o
   1  -1  10       36.72       40.54     21.17 o
   2  -1  10       20.23       12.36     18.53 o
   3  -1  10      154.88      168.12     18.72 o
   4  -1  10        7.46        9.44     12.35 o
   5  -1  10      235.96      302.03     58.94 o
   6  -1  10       10.28       -5.73     34.22 o
   7  -1  10        9.56        1.61     37.71 o
   8  -1  10       43.53       70.22     48.91 o
  -7   0  10       16.09       31.20     33.49 o
  -6   0  10       38.90       50.10     35.03 o
  -5   0  10      279.09      279.16     44.25 o
  -4   0  10       90.94       63.42     30.31 o
  -3   0  10      211.43      184.17     36.80 o
  -2   0  10       14.06       26.25     25.86 o
  -1   0  10       14.81       -2.33     21.50 o
   0   0  10       80.99       89.63     24.70 o
   1   0  10       20.71       25.21     20.25 o
   2   0  10       20.85       18.81     19.25 o
   3   0  10        7.56       18.48     18.75 o
   4   0  10      619.41      614.84     38.33 o
   5   0  10       46.34       64.47     22.02 o
   6   0  10        0.23       12.32     17.89 o
   7   0  10      240.79      284.93     60.28 o
   8   0  10        4.51      -13.61     38.25 o
   9   0  10       19.22       17.38     45.95 o
  -7   1  10        6.81       -1.52     30.75 o
  -6   1  10       42.50       40.23     31.73 o
  -5   1  10      134.76      154.08     38.50 o
  -4   1  10       68.57       51.21     33.01 o
  -3   1  10      718.05      744.44     56.71 o
  -2   1  10      324.14      319.27     48.05 o
  -1   1  10       57.92       83.63     25.41 o
   0   1  10      429.27      434.11     37.70 o
   1   1  10      398.23      417.04     35.69 o
   2   1  10       96.92       99.64     22.65 o
   3   1  10       80.98       82.25     23.62 o
   4   1  10       60.73       50.85     22.94 o
   5   1  10        3.00       13.17     20.95 o
   6   1  10       57.25       43.91     22.94 o
   7   1  10       19.96       48.10     40.84 o
   8   1  10        0.24       14.69     40.22 o
   9   1  10       23.20       32.16     47.20 o
  -6   2  10       50.70       29.97     33.70 o
  -5   2  10      326.27      428.13     67.72 o
  -4   2  10      202.46      190.45     38.66 o
  -3   2  10      385.27      396.51     52.98 o
  -2   2  10      170.64      181.04     47.38 o
  -1   2  10      511.89      469.31     41.45 o
   0   2  10       16.74       26.88     21.03 o
   1   2  10       17.89       13.08     19.23 o
   2   2  10        3.37        8.46     18.70 o
   3   2  10        8.46       13.90     19.92 o
   4   2  10        9.77       11.81     20.73 o
   5   2  10      302.05      263.57     49.89 o
   6   2  10      134.95      132.55     28.69 o
   7   2  10      261.86      234.04     32.26 o
   8   2  10        3.05      -19.17     35.20 o
   9   2  10        1.12       16.93     45.68 o
  -6   3  10       10.84       41.69     39.19 o
  -5   3  10        0.05      -11.10     29.55 o
  -4   3  10      128.99      119.11     35.10 o
  -3   3  10      103.37      112.68     34.97 o
  -2   3  10      170.90      159.20     33.04 o
  -1   3  10       11.13      -21.40     23.13 o
   0   3  10      349.28      371.65     35.51 o
   1   3  10       87.08       91.37     25.05 o
   2   3  10      417.15      392.08     33.61 o
   3   3  10      141.44      139.27     25.11 o
   4   3  10      129.76      150.39     27.52 o
   5   3  10       11.80       30.15     23.04 o
   6   3  10        0.35      -14.04     21.94 o
   7   3  10       47.12       54.16     28.98 o
   8   3  10       80.50       32.25     41.29 o
   9   3  10        9.17      -11.11     42.55 o
  -6   4  10        0.36       -4.33     30.29 o
  -5   4  10       16.15       18.67     29.82 o
  -4   4  10      434.24      387.28     47.78 o
  -3   4  10        2.06      -13.51     26.23 o
  -2   4  10      427.81      436.84     44.78 o
  -1   4  10      535.98      583.27     60.46 o
   0   4  10      581.94      563.99     42.89 o
   1   4  10        6.03       23.81     16.06 o
   2   4  10       71.02       88.82     18.33 o
   3   4  10       12.94       21.45     16.62 o
   4   4  10      269.14      262.57     30.11 o
   5   4  10      113.24      109.09     26.97 o
   6   4  10      341.29      350.91     37.34 o
   7   4  10       15.51       25.09     23.68 o
   8   4  10       10.38      -15.19     23.77 o
   9   4  10       30.94       75.15     49.89 o
  -5   5  10        0.85        5.53     30.69 o
  -4   5  10        2.78       -5.02     26.79 o
  -3   5  10      244.20      236.01     38.42 o
  -2   5  10        0.30       18.30     27.54 o
  -1   5  10       71.73       49.05     28.51 o
   0   5  10        1.11      -22.79     22.79 o
   1   5  10       27.33       30.57     16.08 o
   2   5  10       45.04       49.36     15.62 o
   3   5  10       65.40       54.04     16.54 o
   4   5  10       88.55       97.58     19.73 o
   5   5  10        0.01      -18.97     18.97 o
   6   5  10       19.66       12.27     21.87 o
   7   5  10       14.17       26.99     33.41 o
   8   5  10       38.27       33.14     26.99 o
  -5   6  10        8.69        0.95     28.13 o
  -4   6  10        0.31        6.92     29.10 o
  -3   6  10       65.26      109.46     53.29 o
  -2   6  10       14.02       28.68     26.04 o
  -1   6  10      101.34      124.63     47.65 o
   0   6  10      184.54      190.89     22.22 o
   1   6  10        2.32      -12.33     12.33 o
   2   6  10       57.30       73.18     46.31 o
   3   6  10        1.87        3.24     10.32 o
   4   6  10      285.81      321.86     66.10 o
   5   6  10        8.28       20.68     18.57 o
   6   6  10       22.58       24.35     21.84 o
   7   6  10       72.63       72.58     26.19 o
   8   6  10        0.64        4.19     25.27 o
  -4   7  10        5.26       27.36     29.43 o
  -3   7  10        1.67       31.52     28.18 o
  -2   7  10       97.28       97.94     30.12 o
  -1   7  10       19.61       38.07     23.64 o
   0   7  10      296.88      290.59     32.16 o
   1   7  10        0.02       -8.51     38.61 o
   2   7  10      156.76      209.78     60.28 o
   3   7  10        7.02       18.81     44.52 o
   4   7  10      193.58      179.23     56.07 o
   5   7  10        0.19       10.66     40.13 o
   6   7  10        3.47       -0.72     40.04 o
   7   7  10       18.74       38.52     46.49 o
   8   7  10       69.81       66.37     47.92 o
  -3   8  10        3.12      -36.63     43.26 o
  -2   8  10        7.23       11.47     45.68 o
  -1   8  10       41.78        2.24     43.80 o
   0   8  10      269.15      246.32     59.56 o
   1   8  10      142.30      144.30     55.62 o
   2   8  10       37.14       52.76     46.40 o
   3   8  10       52.40       60.82     48.64 o
   4   8  10       18.37       -2.87     41.92 o
   5   8  10        3.23       11.82     42.90 o
   6   8  10      164.68      105.78     52.94 o
   7   8  10        3.08      -21.32     43.89 o
  -3   9  10        3.74       23.56     48.55 o
  -2   9  10       29.98      -11.20     45.05 o
  -1   9  10       15.75       18.45     48.01 o
   0   9  10      144.77      123.70     57.77 o
   1   9  10       60.57       60.28     51.50 o
   2   9  10      115.56      105.34     55.35 o
   3   9  10      186.86      225.90     64.04 o
   4   9  10        2.38      -10.03     44.25 o
   5   9  10       22.26       77.57     52.40 o
   6   9  10        0.24       -6.00     45.77 o
   7   9  10       11.57      -14.60     47.11 o
  -1  10  10        3.65       22.03     51.50 o
   0  10  10       10.52       57.41     51.77 o
   1  10  10       56.08      102.38     58.04 o
   2  10  10       19.62       -0.36     48.37 o
   3  10  10        1.01       -2.33     46.22 o
   4  10  10      202.44      196.88     66.46 o
   5  10  10       53.51       75.06     55.71 o
   6  10  10       21.36       75.87     55.18 o
   0  11  10        6.98       -4.39     51.23 o
   1  11  10        0.61       -2.51     49.08 o
   2  11  10        6.57       19.35     51.68 o
   3  11  10        0.18      -13.35     48.37 o
   4  11  10        5.46      -14.60     46.22 o
   5  11  10        1.17      -10.66     45.86 o
  -1 -11  11       34.88      -26.60     47.56 o
   0 -11  11        7.94       14.45     42.55 o
  -4 -10  11        6.56      -34.48     52.85 o
  -3 -10  11        1.87      -46.13     46.13 o
  -2 -10  11       20.73      -14.78     44.96 o
  -1 -10  11        3.11      -18.18     43.35 o
   0 -10  11        0.05      -14.06     41.02 o
   1 -10  11       21.15        8.06     43.80 o
   2 -10  11        6.79        9.14     41.47 o
  -5  -9  11       17.10       20.87     56.25 o
  -4  -9  11       11.86      -23.47     55.00 o
  -3  -9  11       16.66       26.51     51.86 o
  -2  -9  11       31.21       17.65     52.22 o
  -1  -9  11        0.94        1.61     46.04 o
   0  -9  11        2.77        2.96     44.43 o
   1  -9  11        3.16       19.88     42.55 o
   2  -9  11       57.03       71.93     48.19 o
   3  -9  11       20.79       37.80     44.07 o
   4  -9  11        0.00       -6.54     42.19 o
  -5  -8  11        6.37      -21.86     49.00 o
  -4  -8  11      145.43      100.50     58.85 o
  -3  -8  11        1.74       -9.76     50.88 o
  -2  -8  11       32.56       39.59     49.08 o
  -1  -8  11       81.20       61.80     49.89 o
   0  -8  11      315.77      330.25     65.66 o
   1  -8  11        7.31       -4.21     40.67 o
   2  -8  11       45.15       32.20     21.76 o
   3  -8  11       50.72       33.41     42.01 o
   4  -8  11       26.11       30.99     43.80 o
   5  -8  11       34.19       44.88     51.23 o
  -6  -7  11        1.04       -9.85     49.89 o
  -5  -7  11       54.25        4.30     51.68 o
  -4  -7  11      106.89       78.20     55.98 o
  -3  -7  11      164.22      135.07     58.49 o
  -2  -7  11      497.02      411.13     72.46 o
  -1  -7  11        3.51        0.81     44.52 o
   0  -7  11       93.69      139.64     53.56 o
   1  -7  11       18.40       30.81     42.73 o
   2  -7  11      192.50      127.46     50.34 o
   3  -7  11      129.73      141.16     52.13 o
   4  -7  11       57.28       23.02     42.10 o
   5  -7  11        0.12        4.75     43.62 o
   6  -7  11       14.48       11.64     44.07 o
  -6  -6  11        4.62        9.67     46.85 o
  -5  -6  11      279.44      223.12     67.81 o
  -4  -6  11        3.89       20.87     49.08 o
  -3  -6  11      129.93      117.61     56.07 o
  -2  -6  11        4.18       37.89     49.53 o
  -1  -6  11      384.36      339.29     69.15 o
   0  -6  11      202.99      183.17     57.41 o
   1  -6  11        1.16      -24.45     40.58 o
   2  -6  11       65.79       69.42     46.22 o
   3  -6  11       26.37       25.53     36.99 o
   4  -6  11        2.80      -22.39     34.40 o
   5  -6  11        2.09       -7.43     38.25 o
   6  -6  11       34.14       40.31     47.65 o
  -6  -5  11       18.09        3.67     47.56 o
  -5  -5  11      263.94      252.50     66.91 o
  -4  -5  11       88.89       71.21     52.85 o
  -3  -5  11      246.38      235.75     61.27 o
  -2  -5  11      213.95      194.37     61.71 o
  -1  -5  11        7.15      -24.54     44.25 o
   0  -5  11      103.53       96.74     51.15 o
   1  -5  11       52.46       33.50     42.64 o
   2  -5  11      309.92      332.49     59.12 o
   3  -5  11       71.63       38.16     41.83 o
   4  -5  11      311.34      295.40     61.54 o
   5  -5  11      481.25      573.88     79.81 o
   6  -5  11        1.44       17.82     42.90 o
   7  -5  11       12.37       33.14     45.77 o
  -7  -4  11       13.11       58.67     63.60 o
  -6  -4  11      103.91      115.37     62.52 o
  -5  -4  11       17.98       41.47     49.80 o
  -4  -4  11        8.92       18.72     46.85 o
  -3  -4  11      822.87      784.19     94.05 o
  -2  -4  11      139.03      134.93     34.26 o
  -1  -4  11       12.58       23.86     28.26 o
   0  -4  11       12.84        9.76     40.93 o
   1  -4  11       57.39       49.89     42.37 o
   2  -4  11       39.39       63.68     41.74 o
   3  -4  11        6.52       41.56     40.58 o
   4  -4  11       14.92      -18.27     34.93 o
   5  -4  11       44.30       33.23     40.84 o
   6  -4  11       76.38       36.28     45.23 o
   7  -4  11        4.99        5.91     41.38 o
  -7  -3  11        1.37       27.32     54.19 o
  -6  -3  11       45.11       54.73     57.33 o
  -5  -3  11        9.10       28.73     31.92 o
  -4  -3  11       72.50       59.29     33.39 o
  -3  -3  11       27.02       19.92     30.25 o
  -2  -3  11      374.38      411.97     45.69 o
  -1  -3  11        0.86       -6.43     25.55 o
   0  -3  11       12.60       18.23     24.49 o
   1  -3  11       51.34       45.79     23.78 o
   2  -3  11        1.40      -18.64     18.76 o
   3  -3  11      166.61      169.56     26.16 o
   4  -3  11      184.19      165.89     52.31 o
   5  -3  11       11.10       21.41     39.68 o
   6  -3  11       11.53        5.64     35.47 o
   7  -3  11      122.90       33.14     44.70 o
   8  -3  11        2.08      -14.33     38.34 o
  -7  -2  11       68.02      133.37     64.13 o
  -6  -2  11        2.08       19.79     31.75 o
  -5  -2  11       12.83       27.74     31.31 o
  -4  -2  11      348.06      357.89     47.56 o
  -3  -2  11       17.41       -7.63     28.45 o
  -2  -2  11      244.19      302.06     40.80 o
  -1  -2  11       10.63        3.39     25.80 o
   0  -2  11      518.62      548.06     59.97 o
   1  -2  11       33.83       26.03     21.76 o
   2  -2  11       21.16        0.59     20.77 o
   3  -2  11       66.40       49.50     21.73 o
   4  -2  11      106.29      105.80     14.72 o
   5  -2  11       10.06       14.42     38.61 o
   6  -2  11        5.07       -3.67     36.99 o
   7  -2  11       50.92       20.42     37.08 o
   8  -2  11        0.16        2.51     42.01 o
  -7  -1  11        3.14       27.51     34.32 o
  -6  -1  11        5.77        8.24     31.68 o
  -5  -1  11      223.99      184.57     41.44 o
  -4  -1  11      444.73      429.45     49.63 o
  -3  -1  11      364.45      368.01     45.15 o
  -2  -1  11        5.60        1.98     27.61 o
  -1  -1  11       49.05       57.71     27.90 o
   0  -1  11        2.85       -0.06     22.51 o
   1  -1  11     1167.19     1101.42     52.39 o
   2  -1  11      384.36      436.52     37.35 o
   3  -1  11      559.49      570.75     39.22 o
   4  -1  11        7.48       -5.26     13.87 o
   5  -1  11        0.26      -16.12     16.12 o
   6  -1  11        3.42       -2.69     34.93 o
   7  -1  11       45.23       44.43     42.37 o
   8  -1  11        0.04      -31.35     39.95 o
  -7   0  11       17.19       49.93     36.03 o
  -6   0  11       34.60        8.25     61.85 o
  -5   0  11       13.06       12.89     31.55 o
  -4   0  11      562.67      564.54     53.18 o
  -3   0  11      250.12      251.81     40.43 o
  -2   0  11        7.25        4.44     26.17 o
  -1   0  11       22.32       16.86     25.74 o
   0   0  11      127.99      154.99     29.39 o
   1   0  11       41.01       20.63     22.10 o
   2   0  11        2.70        2.87     20.44 o
   3   0  11       82.40       90.56     23.94 o
   4   0  11        1.98       -7.82     20.04 o
   5   0  11      110.88      119.68     25.61 o
   6   0  11      152.72      161.23     49.26 o
   7   0  11        4.41        3.05     36.28 o
   8   0  11        8.02       20.87     41.56 o
  -6   1  11       39.46       62.89     36.27 o
  -5   1  11       31.68       82.60     35.45 o
  -4   1  11       17.93       13.12     28.99 o
  -3   1  11      221.19      188.45     39.59 o
  -2   1  11       16.96       17.00     30.36 o
  -1   1  11      346.37      345.59     40.05 o
   0   1  11       63.58       71.45     27.43 o
   1   1  11      280.17      296.67     33.43 o
   2   1  11      264.46      288.51     32.58 o
   3   1  11      128.70      132.59     26.40 o
   4   1  11       17.98       38.62     23.13 o
   5   1  11       24.70        5.01     24.12 o
   6   1  11      443.00      408.13     38.20 o
   7   1  11        2.06       33.77     39.23 o
   8   1  11        3.94       -9.58     36.28 o
  -6   2  11        2.48        0.38     31.75 o
  -5   2  11      110.87      141.42     39.18 o
  -4   2  11      425.17      422.93     49.29 o
  -3   2  11      607.94      648.90     56.04 o
  -2   2  11       14.62       12.92     26.55 o
  -1   2  11       12.15       39.93     28.19 o
   0   2  11        5.90        8.15     24.89 o
   1   2  11       63.05       77.34     25.65 o
   2   2  11      797.81      816.86     46.19 o
   3   2  11        2.89      -17.46     19.87 o
   4   2  11       46.72       66.20     26.28 o
   5   2  11       28.57       17.01     32.87 o
   6   2  11       24.72       19.66     23.72 o
   7   2  11      235.99      204.58     52.67 o
   8   2  11      107.19      155.67     54.55 o
   9   2  11        1.43       -9.32     44.61 o
  -6   3  11        2.28       29.09     31.70 o
  -5   3  11       10.01        0.88     29.70 o
  -4   3  11      505.48      494.58     51.99 o
  -3   3  11       33.86       44.64     31.26 o
  -2   3  11      245.58      253.92     38.09 o
  -1   3  11     2361.76     2443.57     80.94 o
   0   3  11      131.49      128.01     30.33 o
   1   3  11        8.18        9.62     22.63 o
   2   3  11     1325.77     1355.69     61.31 o
   3   3  11        7.51       -1.15     20.96 o
   4   3  11        3.33      -16.17     20.86 o
   5   3  11       17.56       20.91     23.21 o
   6   3  11       55.77       82.09     27.36 o
   7   3  11       15.57      -16.25     22.41 o
   8   3  11      145.18      160.96     53.21 o
   9   3  11       32.43       15.59     41.83 o
  -5   4  11       18.51       24.15     43.62 o
  -4   4  11        7.27       27.65     29.76 o
  -3   4  11        0.02        3.37     25.84 o
  -2   4  11      788.65      692.68     56.49 o
  -1   4  11        7.80       -0.68     29.78 o
   0   4  11     1001.99      941.13     62.12 o
   1   4  11        4.52       15.18     23.88 o
   2   4  11       34.45       38.34     22.65 o
   3   4  11       37.01       37.68     22.76 o
   4   4  11        7.84       -3.44     19.47 o
   5   4  11        0.26       14.53     21.81 o
   6   4  11        0.09        4.78     21.30 o
   7   4  11       47.77       61.98     27.68 o
   8   4  11       60.71       80.43     47.02 o
  -5   5  11        3.76       17.99     31.20 o
  -4   5  11       24.61       33.59     47.20 o
  -3   5  11      133.24      172.86     36.58 o
  -2   5  11      362.71      359.61     42.19 o
  -1   5  11       64.46       79.66     31.39 o
   0   5  11      202.11      218.65     35.82 o
   1   5  11       45.60       54.10     18.75 o
   2   5  11      218.87      218.47     22.01 o
   3   5  11       55.36       65.97     18.42 o
   4   5  11       78.42       96.69     25.18 o
   5   5  11        0.89      -10.45     19.88 o
   6   5  11      241.72      270.93     35.45 o
   7   5  11        4.18      -13.33     22.05 o
   8   5  11        7.22       24.61     26.77 o
  -4   6  11       18.32       46.00     33.45 o
  -3   6  11       38.59       50.58     30.48 o
  -2   6  11      276.12      288.55     58.98 o
  -1   6  11        0.03        1.98     26.83 o
   0   6  11      248.93      227.30     35.53 o
   1   6  11        2.83      -14.58     22.47 o
   2   6  11       31.32        3.77     17.32 o
   3   6  11       52.18       37.91     17.42 o
   4   6  11      117.36      127.38     22.51 o
   5   6  11      244.88      261.50     30.63 o
   6   6  11       53.09       20.06     20.97 o
   7   6  11        4.57       30.48     23.80 o
   8   6  11        4.01       30.54     43.26 o
  -4   7  11        0.06        4.57     29.64 o
  -3   7  11        1.03      -18.80     41.47 o
  -2   7  11       21.91       52.62     27.11 o
  -1   7  11      116.73       96.96     27.41 o
   0   7  11      212.12      164.38     28.18 o
   1   7  11      113.94       96.47     51.23 o
   2   7  11       16.87       39.32     46.58 o
   3   7  11      260.64      189.08     58.04 o
   4   7  11        0.91      -17.56     41.11 o
   5   7  11        0.43        2.87     40.22 o
   6   7  11        1.33      -10.66     38.96 o
   7   7  11        0.72       31.26     46.40 o
   8   7  11        2.27       34.84     46.94 o
  -3   8  11        8.81        6.00     50.79 o
  -2   8  11       55.57        1.52     50.07 o
  -1   8  11        3.21      -35.29     43.89 o
   0   8  11       75.46       79.36     53.12 o
   1   8  11       54.04       64.49     48.55 o
   2   8  11       61.22        7.97     44.07 o
   3   8  11      364.11      350.76     69.06 o
   4   8  11        2.54      -23.92     42.46 o
   5   8  11        0.10        8.33     42.90 o
   6   8  11       87.85      154.78     57.95 o
   7   8  11       12.27       19.08     47.29 o
  -2   9  11        3.63       36.63     55.09 o
  -1   9  11       44.33       78.11     54.64 o
   0   9  11        2.49        4.75     46.04 o
   1   9  11       16.75      -15.85     40.49 o
   2   9  11       63.38       55.71     47.38 o
   3   9  11      219.23      225.90     61.45 o
   4   9  11        0.01       -5.55     44.16 o
   5   9  11       31.99       21.14     49.00 o
   6   9  11       16.61      -24.01     44.96 o
   7   9  11        1.19       13.08     48.73 o
  -1  10  11       14.15      -32.69     47.74 o
   0  10  11        8.99        7.08     49.98 o
   1  10  11        0.00       34.13     50.79 o
   2  10  11      287.44      258.50     67.98 o
   3  10  11        5.98        3.58     47.92 o
   4  10  11       39.50       27.14     52.94 o
   5  10  11        8.69       22.57     51.32 o
   6  10  11        1.66      -19.26     47.65 o
   1  11  11        0.09      -12.09     51.41 o
   2  11  11       15.41        0.72     52.58 o
   3  11  11        1.69       -1.52     50.88 o
   4  11  11       53.31       49.17     53.92 o
  -3 -10  12       62.92       46.58     58.58 o
  -2 -10  12       30.27      -43.17     43.17 o
  -1 -10  12        2.42       12.18     51.32 o
   0 -10  12        3.43       -7.97     45.86 o
   1 -10  12       53.37       31.35     50.07 o
   2 -10  12       16.01       28.75     48.64 o
  -4  -9  12        1.01      -34.75     54.55 o
  -3  -9  12        6.79      -48.10     48.10 o
  -2  -9  12       23.96       35.83     51.15 o
  -1  -9  12       24.50       45.59     54.73 o
   0  -9  12       37.57       91.72     53.38 o
   1  -9  12       64.46       54.37     47.74 o
   2  -9  12       38.40       62.88     49.26 o
   3  -9  12        3.45       -3.67     39.59 o
  -5  -8  12       86.41       46.49     59.48 o
  -4  -8  12       80.77       67.81     58.58 o
  -3  -8  12        3.68       -4.30     51.32 o
  -2  -8  12       34.86       19.88     48.73 o
  -1  -8  12      148.85      146.99     58.31 o
   0  -8  12       51.91       56.97     49.44 o
   1  -8  12       12.18       -9.49     40.04 o
   2  -8  12       27.05       11.02     43.35 o
   3  -8  12        0.80       -0.81     39.32 o
   4  -8  12       17.66       31.35     48.01 o
  -5  -7  12       64.01       26.78     55.71 o
  -4  -7  12       12.59       33.50     55.89 o
  -3  -7  12       22.02        9.49     51.86 o
  -2  -7  12      721.66      700.44     88.68 o
  -1  -7  12        5.36        6.99     44.88 o
   0  -7  12        0.44       25.08     44.70 o
   1  -7  12       13.53       26.96     42.37 o
   2  -7  12       10.96       -9.49     36.19 o
   3  -7  12       84.86       55.00     45.77 o
   4  -7  12       47.21       44.88     46.04 o
   5  -7  12        0.05       19.35     43.08 o
  -6  -6  12       17.09       34.48     55.53 o
  -5  -6  12        7.40      -17.47     46.22 o
  -4  -6  12       11.79      -30.81     45.14 o
  -3  -6  12        0.00       33.68     49.80 o
  -2  -6  12      207.98      192.04     61.45 o
  -1  -6  12      102.83       58.04     52.31 o
   0  -6  12      142.88       83.75     47.20 o
   1  -6  12       47.32        2.33     42.37 o
   2  -6  12       79.85       48.55     46.67 o
   3  -6  12        1.06      -14.69     37.80 o
   4  -6  12       10.45       20.96     36.46 o
   5  -6  12       16.86        3.58     40.84 o
   6  -6  12       12.63        2.87     44.43 o
  -6  -5  12        3.02       10.03     50.79 o
  -5  -5  12        8.64      -39.14     45.68 o
  -4  -5  12       26.88      -36.81     45.86 o
  -3  -5  12      450.28      459.77     75.96 o
  -2  -5  12        6.05       34.93     52.22 o
  -1  -5  12      139.58      160.24     60.28 o
   0  -5  12        0.10        7.17     46.22 o
   1  -5  12       75.96       84.64     50.07 o
   2  -5  12      420.30      533.84     73.81 o
   3  -5  12       10.35        6.63     39.59 o
   4  -5  12       17.92        4.48     39.05 o
   5  -5  12       15.55      -14.15     38.07 o
   6  -5  12       36.35       28.75     45.41 o
   7  -5  12       10.65       -8.06     42.90 o
  -6  -4  12        4.03       19.88     57.33 o
  -5  -4  12       30.60       72.91     54.46 o
  -4  -4  12       22.36       21.32     48.10 o
  -3  -4  12      388.58      366.97     47.01 o
  -2  -4  12       62.40       30.08     30.83 o
  -1  -4  12        2.09      -19.27     27.45 o
   0  -4  12        1.24        3.90     26.56 o
   1  -4  12      139.93      160.51     53.56 o
   2  -4  12       12.42       33.59     42.64 o
   3  -4  12        2.97       19.97     41.92 o
   4  -4  12      211.62      235.21     58.49 o
   5  -4  12       82.22       70.31     44.88 o
   6  -4  12       22.16       41.83     47.11 o
   7  -4  12       63.00       73.27     51.68 o
  -6  -3  12       18.23       49.26     59.65 o
  -5  -3  12        0.18       17.94     31.62 o
  -4  -3  12      388.57      342.48     77.03 o
  -3  -3  12      170.16      137.33     38.62 o
  -2  -3  12        5.92      -14.49     27.25 o
  -1  -3  12       89.71      100.84     31.61 o
   0  -3  12      438.22      487.85     45.03 o
   1  -3  12     1008.18     1091.65     57.47 o
   2  -3  12        1.66      -14.63     23.42 o
   3  -3  12      161.10      151.87     26.69 o
   4  -3  12        4.29       25.89     40.40 o
   5  -3  12       66.11      107.66     46.22 o
   6  -3  12       81.03       96.02     52.04 o
   7  -3  12      191.09      182.28     60.91 o
  -6  -2  12      102.91      106.89     40.77 o
  -5  -2  12       43.52       69.03     39.64 o
  -4  -2  12     1282.11     1292.80     76.08 o
  -3  -2  12        0.99      -26.70     26.82 o
  -2  -2  12      144.04      172.73     37.59 o
  -1  -2  12       29.77        3.20     27.35 o
   0  -2  12       99.43       80.97     28.98 o
   1  -2  12       38.77       25.14     24.07 o
   2  -2  12      115.03       84.94     26.83 o
   3  -2  12       95.62       91.09     24.97 o
   4  -2  12       96.93      116.40     23.75 o
   5  -2  12      134.59      210.22     56.07 o
   6  -2  12       36.73       23.38     40.93 o
   7  -2  12        2.74       11.55     40.22 o
   8  -2  12        4.39       19.17     43.62 o
  -6  -1  12        0.77       15.88     33.83 o
  -5  -1  12       43.98        6.32     30.97 o
  -4  -1  12       53.03       58.51     33.05 o
  -3  -1  12      212.29      215.49     39.97 o
  -2  -1  12      147.02      149.00     35.88 o
  -1  -1  12        0.32       21.58     27.38 o
   0  -1  12       51.49       52.42     27.50 o
   1  -1  12       10.79        6.49     24.75 o
   2  -1  12       14.29       37.86     23.98 o
   3  -1  12        1.15        2.39     21.41 o
   4  -1  12      569.37      601.30     40.98 o
   5  -1  12       35.85       17.51     25.44 o
   6  -1  12       37.70       12.72     38.69 o
   7  -1  12       15.31       -7.52     36.90 o
   8  -1  12        0.31       25.80     43.98 o
  -6   0  12        5.20       28.82     33.90 o
  -5   0  12       53.35      129.56     68.34 o
  -4   0  12      351.96      340.21     48.04 o
  -3   0  12       39.05       63.65     34.49 o
  -2   0  12      367.41      378.21     45.38 o
  -1   0  12      539.46      584.87     49.41 o
   0   0  12       69.94       69.76     28.88 o
   1   0  12      215.33      228.53     34.10 o
   2   0  12      339.24      371.28     37.35 o
   3   0  12        9.12       15.16     23.12 o
   4   0  12      452.64      499.30     40.37 o
   5   0  12       33.22       33.12     23.72 o
   6   0  12       30.62       45.32     40.49 o
   7   0  12        0.00       32.34     41.29 o
   8   0  12       55.70       60.82     48.82 o
  -6   1  12       10.48       30.88     43.62 o
  -5   1  12        3.39        2.60     31.27 o
  -4   1  12       41.27       83.34     48.91 o
  -3   1  12       11.43       14.83     28.00 o
  -2   1  12      402.38      358.31     44.68 o
  -1   1  12       14.65        9.31     27.56 o
   0   1  12      894.31      905.90     54.11 o
   1   1  12       32.85       38.43     26.68 o
   2   1  12       49.54       56.50     25.83 o
   3   1  12        4.40        7.27     23.01 o
   4   1  12      237.01      253.11     49.98 o
   5   1  12       12.43        8.12     24.70 o
   6   1  12       25.94       34.53     23.64 o
   7   1  12        0.88       17.02     39.59 o
   8   1  12       18.14       31.44     46.40 o
  -6   2  12        0.77       13.28     34.22 o
  -5   2  12        0.13       14.24     31.92 o
  -4   2  12        2.18       -2.32     28.78 o
  -3   2  12        0.05       -0.70     28.85 o
  -2   2  12        2.86       27.01     30.73 o
  -1   2  12       40.16       44.80     29.22 o
   0   2  12      594.41      611.61     54.68 o
   1   2  12      257.76      259.37     36.16 o
   2   2  12        0.15      -16.18     22.37 o
   3   2  12      486.86      494.83     42.30 o
   4   2  12       22.33       28.86     24.98 o
   5   2  12      126.16      141.03     32.29 o
   6   2  12       53.96       35.23     42.14 o
   7   2  12        9.42        7.08     38.07 o
   8   2  12      128.13       63.24     45.77 o
  -5   3  12       10.36       21.00     33.21 o
  -4   3  12       33.04       41.09     31.75 o
  -3   3  12      120.85      110.60     36.15 o
  -2   3  12       89.13       87.10     35.76 o
  -1   3  12       72.35       75.47     51.15 o
   0   3  12      172.73      175.42     35.03 o
   1   3  12       46.14       46.12     28.37 o
   2   3  12      118.85      165.93     30.83 o
   3   3  12       35.17        7.31     23.99 o
   4   3  12      214.66      219.40     32.65 o
   5   3  12      114.02      106.54     28.70 o
   6   3  12       91.53       89.12     27.22 o
   7   3  12        9.52       22.37     25.59 o
   8   3  12       34.54       10.57     39.32 o
  -5   4  12        2.11       22.75     32.32 o
  -4   4  12       61.76       60.24     62.74 o
  -3   4  12        2.42       -7.33     27.04 o
  -2   4  12      627.02      669.55     56.91 o
  -1   4  12       14.53       35.81     28.94 o
   0   4  12      320.13      403.74     77.34 o
   1   4  12        0.82        4.50     26.46 o
   2   4  12       61.18       61.87     26.77 o
   3   4  12       79.84       89.50     27.09 o
   4   4  12      345.04      364.19     37.24 o
   5   4  12       27.54       13.20     22.63 o
   6   4  12       71.56       67.52     26.68 o
   7   4  12       37.57       36.80     27.41 o
   8   4  12        0.34       -9.14     37.44 o
  -5   5  12       22.21       42.49     34.61 o
  -4   5  12       38.73       74.53     36.27 o
  -3   5  12        0.30      -15.44     26.93 o
  -2   5  12       38.57       20.85     28.72 o
  -1   5  12       39.14       37.94     30.50 o
   0   5  12       66.59       40.49     29.48 o
   1   5  12        2.57        2.86     25.97 o
   2   5  12      192.71      188.72     29.72 o
   3   5  12        5.27       13.94     21.52 o
   4   5  12      100.21       85.83     25.18 o
   5   5  12       31.71       66.25     24.52 o
   6   5  12       49.79       52.39     25.45 o
   7   5  12        0.07       -0.61     23.65 o
   8   5  12        4.33       -9.44     24.88 o
  -4   6  12        5.03       19.79     31.26 o
  -3   6  12       12.73       26.63     30.95 o
  -2   6  12        0.05      -11.63     27.49 o
  -1   6  12       63.35       75.49     30.02 o
   0   6  12       14.19        3.42     25.27 o
   1   6  12     1338.90     1398.86     56.72 o
   2   6  12        2.69        0.09     18.59 o
   3   6  12       69.45       37.08     20.47 o
   4   6  12      200.96      149.94     23.25 o
   5   6  12       49.15       35.44     19.22 o
   6   6  12       98.97      115.73     53.38 o
   7   6  12        1.13       -4.12     42.55 o
   8   6  12       11.88        8.96     45.59 o
  -3   7  12        1.30       17.89     27.58 o
  -2   7  12        2.69       14.97     41.29 o
  -1   7  12       63.54       71.75     52.22 o
   0   7  12       10.52       -3.13     44.34 o
   1   7  12        4.27        0.18     42.81 o
   2   7  12        8.32       11.73     43.62 o
   3   7  12       59.37       39.77     46.22 o
   4   7  12        3.61        0.27     40.75 o
   5   7  12       43.64       46.49     50.34 o
   6   7  12        0.10       16.21     44.79 o
   7   7  12       31.93       50.16     48.37 o
  -3   8  12       30.37        6.36     49.26 o
  -2   8  12        0.32       29.92     49.08 o
  -1   8  12        1.54      -15.76     44.88 o
   0   8  12        2.61      -43.89     43.89 o
   1   8  12        0.03      -28.48     38.61 o
   2   8  12      333.64      360.61     71.66 o
   3   8  12       66.24       79.09     52.94 o
   4   8  12      145.18      233.33     63.15 o
   5   8  12      129.44      109.90     55.27 o
   6   8  12       58.67       17.91     46.40 o
   7   8  12        0.02       47.65     50.70 o
  -2   9  12        0.00      -42.81     48.55 o
  -1   9  12       31.24       49.35     54.10 o
   0   9  12        5.68        1.25     48.55 o
   1   9  12        0.05      -18.63     49.08 o
   2   9  12      122.11      151.02     57.95 o
   3   9  12       18.29       11.29     49.53 o
   4   9  12       46.17       58.04     53.12 o
   5   9  12       27.47       16.57     47.83 o
   6   9  12       51.68      146.90     61.09 o
   0  10  12        0.88       -9.67     51.59 o
   1  10  12       19.70      -24.18     43.62 o
   2  10  12       32.89       42.46     54.73 o
   3  10  12       10.37      -21.50     47.92 o
   4  10  12        1.78        5.46     46.40 o
   5  10  12       69.11      105.43     60.82 o
  -2 -10  13       19.19       -9.23     50.97 o
  -1 -10  13        5.79      -14.60     47.65 o
   0 -10  13       13.79      -12.90     44.16 o
   1 -10  13        3.23      -36.90     36.90 o
  -3  -9  13        1.21       26.51     55.00 o
  -2  -9  13       21.86       30.01     56.88 o
  -1  -9  13       48.63      108.11     57.68 o
   0  -9  13        0.57      -25.44     43.26 o
   1  -9  13       66.66       86.44     52.94 o
   2  -9  13        1.08      -27.59     41.56 o
   3  -9  13       10.33       14.06     45.05 o
  -4  -8  13        0.76       17.11     58.31 o
  -3  -8  13        1.89       -5.82     51.95 o
  -2  -8  13       28.68      -18.45     49.98 o
  -1  -8  13        2.88       19.08     47.47 o
   0  -8  13        7.85       11.38     44.52 o
   1  -8  13       24.79       43.71     47.74 o
   2  -8  13       26.73       13.79     44.34 o
   3  -8  13        5.94       -5.20     41.74 o
   4  -8  13       23.12      -10.30     42.99 o
  -5  -7  13       52.30       84.73     65.39 o
  -4  -7  13        0.06        2.78     52.76 o
  -3  -7  13        1.01      -44.52     44.52 o
  -2  -7  13        0.18       10.39     48.19 o
  -1  -7  13       57.24       60.82     53.65 o
   0  -7  13       78.95       84.38     50.97 o
   1  -7  13       69.57       53.56     48.37 o
   2  -7  13      171.69      108.20     53.74 o
   3  -7  13       44.96       42.64     46.04 o
   4  -7  13        0.70        4.84     42.46 o
   5  -7  13       47.43       16.30     43.89 o
  -5  -6  13        0.22       37.71     53.83 o
  -4  -6  13       23.18        9.67     52.67 o
  -3  -6  13       74.52      111.87     57.59 o
  -2  -6  13        1.43       19.17     49.71 o
  -1  -6  13       33.18       20.33     47.83 o
   0  -6  13      281.79      282.24     61.62 o
   1  -6  13        0.98        5.11     41.11 o
   2  -6  13        9.97        9.40     42.37 o
   3  -6  13        0.03      -23.29     37.44 o
   4  -6  13       26.21       22.21     42.64 o
   5  -6  13       93.76       95.12     53.83 o
   6  -6  13        0.86      -35.20     38.96 o
  -6  -5  13        6.42       60.01     58.04 o
  -5  -5  13       34.27       23.74     54.82 o
  -4  -5  13       57.53       54.82     56.25 o
  -3  -5  13      194.20      268.26     67.72 o
  -2  -5  13      100.01      123.43     58.04 o
  -1  -5  13      673.94      674.83     83.66 o
   0  -5  13      107.94      134.09     56.16 o
   1  -5  13      226.59      280.00     64.40 o
   2  -5  13        2.61        0.72     37.89 o
   3  -5  13      104.95      120.29     50.07 o
   4  -5  13       19.11       39.05     44.34 o
   5  -5  13       59.61       30.01     45.41 o
   6  -5  13       34.14        9.94     44.52 o
  -6  -4  13        6.18        9.14     54.10 o
  -5  -4  13       41.30       51.59     54.28 o
  -4  -4  13        9.26       11.64     48.46 o
  -3  -4  13      406.71      367.63     48.91 o
  -2  -4  13        2.74        1.84     25.26 o
  -1  -4  13      149.72      189.19     39.13 o
   0  -4  13       57.70       68.22     30.60 o
   1  -4  13       83.25       94.99     30.35 o
   2  -4  13        0.21      -25.80     39.50 o
   3  -4  13       38.83       34.04     39.23 o
   4  -4  13       99.81       82.23     45.41 o
   5  -4  13        2.12       32.25     43.44 o
   6  -4  13        3.40        0.36     41.74 o
   7  -4  13       93.74       98.71     58.58 o
  -6  -3  13       12.53       32.25     59.21 o
  -5  -3  13      165.55      170.42     42.81 o
  -4  -3  13        7.47        5.87     31.49 o
  -3  -3  13       33.28       20.71     31.63 o
  -2  -3  13       29.05        9.65     30.99 o
  -1  -3  13       32.93       13.64     36.54 o
   0  -3  13       32.37       30.63     29.13 o
   1  -3  13        1.41       -2.45     25.65 o
   2  -3  13      717.84      700.79     48.76 o
   3  -3  13      759.43      749.39     67.98 o
   4  -3  13        3.06       -5.64     37.44 o
   5  -3  13       51.11       90.91     50.07 o
   6  -3  13      131.44      188.99     60.01 o
   7  -3  13       51.42       39.32     44.07 o
  -6  -2  13       53.33       65.19     40.36 o
  -5  -2  13       22.58       33.48     36.25 o
  -4  -2  13       25.10       38.28     30.44 o
  -3  -2  13       41.00       71.84     34.90 o
  -2  -2  13      585.19      531.19     53.66 o
  -1  -2  13        5.86       14.71     29.33 o
   0  -2  13        2.52        7.84     27.03 o
   1  -2  13      105.42      101.72     31.15 o
   2  -2  13       30.78       58.89     26.39 o
   3  -2  13        0.38        8.49     23.55 o
   4  -2  13      153.79      195.58     28.07 o
   5  -2  13      132.19      125.94     51.50 o
   6  -2  13        3.16       12.27     40.93 o
   7  -2  13       49.62       28.75     45.86 o
  -6  -1  13       21.87       46.80     36.23 o
  -5  -1  13      117.72      119.06     40.60 o
  -4  -1  13       77.08      118.51     53.47 o
  -3  -1  13       28.38       35.49     31.86 o
  -2  -1  13       27.11       28.86     54.50 o
  -1  -1  13      299.31      316.41     43.23 o
   0  -1  13      612.84      653.03     52.19 o
   1  -1  13      134.93      147.60     32.12 o
   2  -1  13       19.35       21.30     25.34 o
   3  -1  13      813.55      849.37     50.99 o
   4  -1  13        2.26       22.96     22.38 o
   5  -1  13        2.69        5.11     36.54 o
   6  -1  13      151.00      133.64     54.55 o
   7  -1  13        0.11      -34.13     34.13 o
   8  -1  13       24.59       44.79     47.74 o
  -6   0  13       36.43       45.92     58.67 o
  -5   0  13      142.32      157.62     44.16 o
  -4   0  13       37.70       21.25     30.56 o
  -3   0  13       55.88       72.43     33.81 o
  -2   0  13      549.62      556.32     53.47 o
  -1   0  13        2.00        1.40     29.65 o
   0   0  13       10.67       38.55     28.86 o
   1   0  13        4.48       17.72     27.52 o
   2   0  13        2.89        0.08     23.31 o
   3   0  13        1.43       17.48     24.47 o
   4   0  13       71.17       86.39     27.43 o
   5   0  13       50.78       82.11     26.39 o
   6   0  13       12.61       11.55     40.84 o
   7   0  13       31.89       25.44     42.99 o
   8   0  13       28.59      -28.30     40.75 o
  -6   1  13        8.20       46.35     36.53 o
  -5   1  13        3.50        5.32     33.62 o
  -4   1  13        2.74        2.26     30.47 o
  -3   1  13        0.00      -25.59     27.82 o
  -2   1  13       39.04       33.91     32.58 o
  -1   1  13      203.91      234.54     41.77 o
   0   1  13      354.50      330.36     41.80 o
   1   1  13        2.19       19.06     27.76 o
   2   1  13      844.23      824.67     52.72 o
   3   1  13      163.00      143.09     31.82 o
   4   1  13       30.04       35.78     25.43 o
   5   1  13       41.69       39.74     27.25 o
   6   1  13      349.42      365.23     39.81 o
   7   1  13       75.83       41.38     46.49 o
   8   1  13        9.27        1.07     41.56 o
  -5   2  13        2.05       -8.45     31.43 o
  -4   2  13        6.55      -22.14     28.76 o
  -3   2  13       56.37       84.52     34.91 o
  -2   2  13      713.16      742.04     59.85 o
  -1   2  13        8.98       48.09     33.08 o
   0   2  13      509.28      512.82     47.94 o
   1   2  13      516.30      546.52     45.75 o
   2   2  13      203.90      204.83     34.16 o
   3   2  13       61.26       59.42     34.22 o
   4   2  13       11.22        7.20     24.72 o
   5   2  13       14.19        9.96     25.62 o
   6   2  13      144.12      123.05     30.15 o
   7   2  13        1.95        4.30     34.84 o
   8   2  13        0.13       -9.85     35.74 o
  -5   3  13       23.52       70.17     37.07 o
  -4   3  13       42.85       48.28     35.60 o
  -3   3  13       99.86      126.83     43.93 o
  -2   3  13      213.43      195.73     46.80 o
  -1   3  13      128.05      142.71     37.77 o
   0   3  13       58.80      100.97     34.07 o
   1   3  13       41.75       17.27     26.33 o
   2   3  13      115.42      131.90     32.42 o
   3   3  13      155.52      193.95     35.47 o
   4   3  13       76.02       89.96     29.46 o
   5   3  13       24.46       35.28     26.00 o
   6   3  13       58.58       45.05     26.12 o
   7   3  13       62.40       76.45     29.67 o
   8   3  13       11.92       31.89     40.93 o
  -5   4  13        3.02       -7.47     31.01 o
  -4   4  13       25.32       29.68     33.99 o
  -3   4  13        2.25       15.77     30.99 o
  -2   4  13       42.53       18.75     29.54 o
  -1   4  13       35.66       30.81     38.47 o
   0   4  13       18.00        2.51     29.95 o
   1   4  13        9.70       -5.50     26.37 o
   2   4  13        8.22       10.37     26.76 o
   3   4  13      102.07       79.88     28.07 o
   4   4  13      124.07      128.65     29.45 o
   5   4  13      150.26      182.70     43.49 o
   6   4  13       14.24       18.70     24.74 o
   7   4  13       23.39       -6.49     24.62 o
   8   4  13       62.06       37.08     42.37 o
  -4   5  13       54.51       43.92     33.69 o
  -3   5  13        1.50      -18.52     28.45 o
  -2   5  13      390.50      386.16     47.27 o
  -1   5  13        5.69      -18.81     26.76 o
   0   5  13      197.04      264.57     42.50 o
   1   5  13       14.02       13.99     26.47 o
   2   5  13        5.43       27.74     25.73 o
   3   5  13       10.67      -13.29     22.17 o
   4   5  13      260.69      290.85     34.53 o
   5   5  13       12.40        3.07     21.31 o
   6   5  13       48.28       65.30     26.71 o
   7   5  13        3.04       -2.75     24.16 o
   8   5  13       18.67       55.80     41.47 o
  -4   6  13        4.28       27.02     38.65 o
  -3   6  13        3.42       32.58     31.60 o
  -2   6  13       56.39       37.02     31.64 o
  -1   6  13        0.33       23.28     28.71 o
   0   6  13       82.79       57.34     28.08 o
   1   6  13        7.92      -20.78     20.78 o
   2   6  13        4.99      -11.99     17.40 o
   3   6  13      159.67      145.54     67.72 o
   4   6  13        0.75       39.41     45.68 o
   5   6  13       10.78       24.18     42.46 o
   6   6  13      481.92      548.44     78.55 o
   7   6  13        1.60       23.92     45.59 o
  -3   7  13        2.33       16.39     52.04 o
  -2   7  13      104.77       97.99     58.22 o
  -1   7  13       78.23       13.35     49.89 o
   0   7  13       22.04       18.81     46.67 o
   1   7  13       93.01       70.40     51.59 o
   2   7  13       90.03       65.75     51.32 o
   3   7  13       62.49       32.25     48.37 o
   4   7  13       17.64       40.75     50.16 o
   5   7  13      115.57      169.02     58.94 o
   6   7  13       49.73      -22.03     42.99 o
   7   7  13       12.87        5.64     45.95 o
  -2   8  13        9.60        5.73     50.70 o
  -1   8  13      100.59       80.35     59.92 o
   0   8  13       63.09       54.01     53.21 o
   1   8  13        5.18        2.87     48.10 o
   2   8  13      137.78      105.43     57.95 o
   3   8  13        1.23       16.48     49.44 o
   4   8  13      125.17      234.14     64.94 o
   5   8  13       37.18       38.87     50.34 o
   6   8  13      123.01       69.15     55.09 o
   7   8  13        0.83      -21.41     48.55 o
  -1   9  13        0.50      -27.41     46.31 o
   0   9  13      188.77      205.74     65.57 o
   1   9  13        4.09      -22.84     44.16 o
   2   9  13       13.79      -14.15     48.01 o
   3   9  13        3.57      -39.32     44.88 o
   4   9  13       51.77       56.34     55.00 o
   5   9  13       22.45       20.33     53.38 o
   6   9  13        1.99       -0.36     50.25 o
   1  10  13        2.42      -21.50     47.65 o
   2  10  13       49.97       26.07     55.27 o
   3  10  13       15.57      -15.94     46.58 o
   4  10  13       59.43       67.18     59.92 o
  -2  -9  14       28.71       61.62     59.03 o
  -1  -9  14       21.40       -0.90     51.95 o
   0  -9  14       14.34      -18.81     44.96 o
   1  -9  14        6.28       -2.87     43.71 o
   2  -9  14       12.61       24.81     47.83 o
  -3  -8  14        4.47       31.44     55.98 o
  -2  -8  14        0.12        8.42     52.94 o
  -1  -8  14        2.90      -37.89     46.04 o
   0  -8  14       11.93       63.60     52.31 o
   1  -8  14       47.68       80.70     51.15 o
   2  -8  14       79.46       52.31     49.17 o
   3  -8  14       20.60       52.22     48.91 o
  -4  -7  14        6.79      -29.56     52.31 o
  -3  -7  14        2.06      -19.35     52.04 o
  -2  -7  14       61.52       16.03     54.19 o
  -1  -7  14       12.98       12.27     48.64 o
   0  -7  14       36.14       36.28     51.15 o
   1  -7  14       84.90       64.04     52.31 o
   2  -7  14       25.58       67.36     50.79 o
   3  -7  14        2.54       -4.39     43.98 o
   4  -7  14       33.18       15.67     43.08 o
  -5  -6  14       18.18      -35.74     50.79 o
  -4  -6  14       11.03      -19.17     50.61 o
  -3  -6  14       70.30       51.06     56.52 o
  -2  -6  14       46.93       49.80     52.58 o
  -1  -6  14       98.17       41.11     51.86 o
   0  -6  14      384.48      362.40     72.02 o
   1  -6  14        0.13       16.75     43.98 o
   2  -6  14       53.25       44.43     47.83 o
   3  -6  14        0.70        2.24     42.64 o
   4  -6  14       25.07       27.59     43.26 o
   5  -6  14       22.82       18.90     45.14 o
  -5  -5  14        3.29        2.60     53.12 o
  -4  -5  14        0.00      -24.01     47.92 o
  -3  -5  14        0.01      -26.87     50.70 o
  -2  -5  14        7.60       -2.24     48.64 o
  -1  -5  14      235.13      206.55     63.60 o
   0  -5  14       61.39       48.73     50.43 o
   1  -5  14      128.20       75.87     49.89 o
   2  -5  14       35.78       40.04     39.77 o
   3  -5  14       57.41        9.23     40.84 o
   4  -5  14      112.43       57.77     43.53 o
   5  -5  14       14.71       29.56     42.37 o
   6  -5  14       13.38       42.10     49.53 o
  -5  -4  14       80.40       49.44     57.33 o
  -4  -4  14       24.50       -8.87     49.71 o
  -3  -4  14        0.47      -17.09     28.66 o
  -2  -4  14       13.99        1.69     28.29 o
  -1  -4  14        3.17        4.97     28.32 o
   0  -4  14       85.22       76.64     30.85 o
   1  -4  14      316.22      277.69     64.36 o
   2  -4  14       25.84        3.94     37.71 o
   3  -4  14        5.49       32.87     42.64 o
   4  -4  14      120.85      121.46     52.40 o
   5  -4  14        0.90      -17.11     37.98 o
   6  -4  14        2.64       20.42     43.17 o
  -5  -3  14        5.81       30.43     34.06 o
  -4  -3  14      140.50       79.11     37.12 o
  -3  -3  14      223.84      271.36     45.76 o
  -2  -3  14        2.03       -7.59     27.60 o
  -1  -3  14      731.99      681.81     56.38 o
   0  -3  14      214.46      226.67     38.32 o
   1  -3  14       25.00       55.03     43.53 o
   2  -3  14       47.69       96.55     31.28 o
   3  -3  14        0.14        7.27     20.85 o
   4  -3  14      411.53      420.63     71.48 o
   5  -3  14      114.40       42.64     44.88 o
   6  -3  14        9.36      -23.02     37.80 o
   7  -3  14        4.00        3.94     43.26 o
  -5  -2  14        2.92      -31.56     31.98 o
  -4  -2  14        0.00       32.39     33.04 o
  -3  -2  14      140.20      158.82     57.41 o
  -2  -2  14      251.24      220.14     41.62 o
  -1  -2  14       13.26       46.39     32.32 o
   0  -2  14       40.69       71.33     33.20 o
   1  -2  14        5.32      -24.21     24.21 o
   2  -2  14       72.99       63.83     28.78 o
   3  -2  14       99.00      131.09     30.92 o
   4  -2  14      283.06      278.66     46.98 o
   5  -2  14       24.78       24.90     42.64 o
   6  -2  14      129.33      144.30     57.77 o
   7  -2  14       78.58      114.65     54.91 o
  -5  -1  14        8.79       -5.60     33.02 o
  -4  -1  14        3.62       -9.43     29.78 o
  -3  -1  14        5.82      -15.79     26.61 o
  -2  -1  14      153.10      186.20     41.01 o
  -1  -1  14        3.40      -11.33     30.00 o
   0  -1  14        7.10        0.25     28.34 o
   1  -1  14      564.36      645.26     51.55 o
   2  -1  14        1.15       -1.81     25.82 o
   3  -1  14       44.39       58.33     27.48 o
   4  -1  14      318.16      351.36     36.75 o
   5  -1  14        1.97      -19.08     37.17 o
   6  -1  14        2.10      -34.48     34.48 o
   7  -1  14        3.67       51.86     47.02 o
  -5   0  14        5.80       14.25     33.76 o
  -4   0  14       40.99       71.13     45.82 o
  -3   0  14        0.07       24.59     32.39 o
  -2   0  14      548.10      531.06     54.16 o
  -1   0  14      127.66      130.89     38.18 o
   0   0  14      119.47      183.12     37.62 o
   1   0  14       55.35       72.58     30.47 o
   2   0  14      268.05      226.70     36.21 o
   3   0  14       98.83      121.18     31.21 o
   4   0  14       71.18       47.79     29.02 o
   5   0  14        0.70      -15.53     22.07 o
   6   0  14       36.16       18.63     38.96 o
   7   0  14        1.40      -29.20     34.66 o
   8   0  14       13.04      -18.63     38.61 o
  -5   1  14       21.13       34.41     36.78 o
  -4   1  14        6.76        9.72     31.45 o
  -3   1  14      108.36      151.75     40.17 o
  -2   1  14      415.44      377.20     48.99 o
  -1   1  14       36.24       11.77     30.97 o
   0   1  14       26.85       24.12     31.17 o
   1   1  14       10.71       50.39     29.13 o
   2   1  14        1.09       21.58     29.22 o
   3   1  14       18.19       29.41     27.10 o
   4   1  14       10.09       -3.62     24.86 o
   5   1  14       87.47       46.04     26.58 o
   6   1  14       38.64       12.18     36.99 o
   7   1  14       58.26       91.54     48.64 o
   8   1  14       25.89       41.65     47.74 o
  -5   2  14       13.75       29.42     42.77 o
  -4   2  14        0.71       22.45     35.00 o
  -3   2  14       90.15       86.76     36.35 o
  -2   2  14      158.08      150.93     36.74 o
  -1   2  14       76.82       60.88     35.24 o
   0   2  14      710.89      713.65     59.43 o
   1   2  14       38.93       46.92     31.01 o
   2   2  14       81.20      111.29     32.76 o
   3   2  14        2.20      -23.05     25.16 o
   4   2  14       38.58       76.26     29.25 o
   5   2  14        0.09      -21.58     23.03 o
   6   2  14       92.25      113.91     30.58 o
   7   2  14       21.20        3.76     37.26 o
   8   2  14        7.47      -23.83     40.75 o
  -5   3  14        7.60       20.50     35.20 o
  -4   3  14       25.84       57.16     36.99 o
  -3   3  14       40.18       22.42     33.71 o
  -2   3  14      297.80      235.79     42.49 o
  -1   3  14        0.72       -1.77     30.65 o
   0   3  14      429.63      480.75     49.54 o
   1   3  14        0.07       -5.84     28.51 o
   2   3  14      230.56      237.90     37.94 o
   3   3  14       36.97       36.51     27.16 o
   4   3  14       93.14      117.55     30.90 o
   5   3  14       29.69       25.89     34.13 o
   6   3  14       12.19        0.34     25.52 o
   7   3  14       38.46       51.50     42.73 o
   8   3  14        0.69        5.91     37.35 o
  -4   4  14       40.55       14.10     35.04 o
  -3   4  14        6.25       27.86     34.15 o
  -2   4  14       73.48       80.25     35.08 o
  -1   4  14       18.45       -6.69     29.11 o
   0   4  14       17.87      -11.27     29.06 o
   1   4  14     1178.43     1241.00     99.07 o
   2   4  14       33.24       13.54     26.55 o
   3   4  14      284.56      275.17     37.14 o
   4   4  14       15.92       -4.32     23.51 o
   5   4  14       27.99       23.21     24.51 o
   6   4  14        4.07       14.70     24.86 o
   7   4  14        1.18      -20.37     23.37 o
   8   4  14        1.84      -11.73     38.69 o
  -4   5  14       31.77       21.65     34.90 o
  -3   5  14        0.55       16.37     30.92 o
  -2   5  14        2.44       11.63     29.92 o
  -1   5  14        1.51       26.91     31.05 o
   0   5  14      160.99      139.35     35.32 o
   1   5  14       32.69        4.87     26.11 o
   2   5  14        1.35        1.51     23.34 o
   3   5  14      190.57      221.50     32.34 o
   4   5  14       10.35      -12.41     21.32 o
   5   5  14       74.96       56.63     25.53 o
   6   5  14       83.32       49.14     25.40 o
   7   5  14       26.67       42.37     44.07 o
  -3   6  14       31.46       66.37     37.62 o
  -2   6  14       13.61       30.58     31.74 o
  -1   6  14        3.65       -5.09     26.46 o
   0   6  14      183.88      151.10     34.27 o
   1   6  14       69.48       40.94     38.29 o
   2   6  14      318.62      317.17     68.07 o
   3   6  14        0.76       -0.81     42.10 o
   4   6  14      183.90      165.53     57.15 o
   5   6  14        0.43       29.29     46.49 o
   6   6  14       19.86       47.11     49.62 o
   7   6  14        7.14       37.17     45.14 o
  -2   7  14        2.10        2.87     50.43 o
  -1   7  14       23.27       19.97     49.44 o
   0   7  14       44.18       78.20     54.28 o
   1   7  14      123.37       86.79     54.37 o
   2   7  14        8.21      -11.02     44.43 o
   3   7  14       69.73       74.79     51.59 o
   4   7  14       10.06       16.03     45.95 o
   5   7  14        1.14      -12.81     44.52 o
   6   7  14       14.89       20.60     46.85 o
   7   7  14       27.78       39.23     51.15 o
  -1   8  14       86.90       39.23     54.55 o
   0   8  14        0.63      -14.51     45.95 o
   1   8  14       11.38       21.41     44.52 o
   2   8  14      103.10       82.41     54.37 o
   3   8  14        4.54      -36.19     44.34 o
   4   8  14       69.83       80.97     55.71 o
   5   8  14        4.90      -14.06     47.20 o
   6   8  14        9.43      -30.81     43.71 o
   0   9  14        0.79      -44.96     44.96 o
   1   9  14       29.68       12.99     54.91 o
   2   9  14       12.03       -5.02     51.32 o
   3   9  14        0.10       -8.96     49.35 o
   4   9  14      156.91      158.09     64.67 o
   5   9  14       13.21       34.48     51.77 o
  -1  -9  15        0.00      -42.37     48.73 o
   0  -9  15        5.51       18.18     50.61 o
   1  -9  15        5.85      -18.18     44.79 o
  -3  -8  15       63.05       46.40     60.19 o
  -2  -8  15       21.04        5.73     53.65 o
  -1  -8  15        0.14      -37.26     45.77 o
   0  -8  15        4.96        1.70     49.08 o
   1  -8  15        9.34      -41.83     41.83 o
   2  -8  15        4.80      -26.78     40.13 o
   3  -8  15        2.32      -11.64     41.92 o
  -3  -7  15      141.67      202.43     70.76 o
  -2  -7  15        1.27      -48.46     48.46 o
  -1  -7  15       61.79       84.29     58.76 o
   0  -7  15       10.04       -6.54     46.76 o
   1  -7  15        5.90       49.00     49.53 o
   2  -7  15        1.85       -5.28     43.26 o
   3  -7  15       20.01        8.69     44.34 o
   4  -7  15        0.03        0.72     40.31 o
  -4  -6  15       20.13       66.37     60.64 o
  -3  -6  15       18.91        6.81     53.65 o
  -2  -6  15        1.15       -2.69     49.98 o
  -1  -6  15        0.43        2.24     49.62 o
   0  -6  15      167.49      120.03     56.43 o
   1  -6  15       22.71       43.62     50.70 o
   2  -6  15        4.71       -4.75     43.08 o
   3  -6  15       61.78       86.62     53.65 o
   4  -6  15       55.64       88.23     52.76 o
   5  -6  15        0.06      -29.29     39.14 o
  -4  -5  15       16.02      -17.91     53.38 o
  -3  -5  15        1.97        6.18     53.74 o
  -2  -5  15        0.71       24.36     51.06 o
  -1  -5  15       31.19       -2.60     46.76 o
   0  -5  15       14.78       39.59     50.16 o
   1  -5  15       10.98       -9.94     43.35 o
   2  -5  15      626.78      542.98     80.70 o
   3  -5  15      215.69      246.86     64.67 o
   4  -5  15       10.72       25.08     41.47 o
   5  -5  15       25.59       25.35     45.50 o
  -5  -4  15       20.64        4.75     55.27 o
  -4  -4  15       11.68       -0.81     52.13 o
  -3  -4  15        1.97       -3.08     33.51 o
  -2  -4  15      350.72      341.02     48.82 o
  -1  -4  15      165.12      117.17     37.29 o
   0  -4  15       25.95       13.06     28.04 o
   1  -4  15      286.41      260.48     38.61 o
   2  -4  15       83.71       85.18     49.89 o
   3  -4  15        2.50       18.18     43.89 o
   4  -4  15        4.66       20.24     44.52 o
   5  -4  15        0.78       23.47     45.77 o
   6  -4  15       13.92        7.43     38.25 o
  -5  -3  15        7.44       19.75     35.13 o
  -4  -3  15       94.99      115.28     40.84 o
  -3  -3  15       15.62       22.19     32.72 o
  -2  -3  15       37.13       44.28     33.67 o
  -1  -3  15      332.06      399.81     49.11 o
   0  -3  15       53.05       52.76     31.06 o
   1  -3  15       70.51       91.08     32.45 o
   2  -3  15      144.74      133.28     31.16 o
   3  -3  15      169.15      173.70     57.28 o
   4  -3  15       62.42       78.11     50.61 o
   5  -3  15        4.18       11.29     42.46 o
   6  -3  15      100.89      108.83     57.15 o
  -5  -2  15       18.53       20.85     35.16 o
  -4  -2  15        0.09       -2.24     33.24 o
  -3  -2  15        1.27       42.10     33.76 o
  -2  -2  15      173.88      169.02     41.38 o
  -1  -2  15       51.94       49.65     32.58 o
   0  -2  15      151.82      193.60     40.21 o
   1  -2  15      129.97      141.50     35.38 o
   2  -2  15      228.78      286.40     39.26 o
   3  -2  15       83.02       89.72     32.20 o
   4  -2  15        0.25       22.38     22.93 o
   5  -2  15       52.71       57.86     46.58 o
   6  -2  15        8.52       -2.24     43.71 o
   7  -2  15        8.66       27.95     48.10 o
  -5  -1  15       12.18       23.57     33.48 o
  -4  -1  15       34.98       40.94     35.99 o
  -3  -1  15       36.48       22.61     31.91 o
  -2  -1  15      451.14      469.57     53.46 o
  -1  -1  15        5.44       24.06     30.58 o
   0  -1  15       78.23       90.53     34.24 o
   1  -1  15      140.38      161.28     36.69 o
   2  -1  15      105.73       91.76     33.22 o
   3  -1  15       72.49       87.55     29.86 o
   4  -1  15        8.28      -14.88     23.22 o
   5  -1  15      122.16      115.82     51.32 o
   6  -1  15       27.68       19.44     47.29 o
   7  -1  15       38.08       87.87     53.29 o
  -5   0  15        0.09      -15.54     33.05 o
  -4   0  15       11.05      -16.37     31.49 o
  -3   0  15        0.69      -22.87     29.36 o
  -2   0  15       23.13       58.08     33.66 o
  -1   0  15        3.47      -17.49     31.71 o
   0   0  15      356.60      360.59     47.27 o
   1   0  15       12.37       22.41     29.90 o
   2   0  15       39.09       55.69     31.00 o
   3   0  15      400.99      420.85     52.98 o
   4   0  15      131.07      147.59     32.52 o
   5   0  15       60.40       47.05     26.27 o
   6   0  15        0.00      -31.53     39.95 o
   7   0  15        8.46      -10.84     38.52 o
  -5   1  15        6.45       16.29     37.66 o
  -4   1  15        8.90        6.18     33.62 o
  -3   1  15       18.65      -17.29     27.84 o
  -2   1  15       67.10       14.05     32.27 o
  -1   1  15        4.33       -3.35     36.41 o
   0   1  15      152.14      143.46     37.79 o
   1   1  15      309.26      314.26     44.16 o
   2   1  15      467.76      470.71     47.25 o
   3   1  15      391.56      423.27     44.48 o
   4   1  15       14.63      -23.82     24.18 o
   5   1  15        0.09        3.67     24.34 o
   6   1  15       31.50       85.45     46.04 o
   7   1  15        9.24       19.53     42.99 o
  -4   2  15        0.54        5.50     34.11 o
  -3   2  15       18.33      -15.42     47.97 o
  -2   2  15      145.73      180.33     42.49 o
  -1   2  15        0.46       11.05     40.53 o
   0   2  15      276.28      253.30     41.99 o
   1   2  15        5.34       -8.80     29.33 o
   2   2  15       15.32       15.94     29.92 o
   3   2  15       57.74       81.35     31.82 o
   4   2  15      133.04      137.51     32.65 o
   5   2  15        3.01       14.89     29.11 o
   6   2  15        3.65      -16.88     25.10 o
   7   2  15        0.20        2.06     39.86 o
  -4   3  15       12.37       30.28     36.20 o
  -3   3  15        7.63       22.23     33.96 o
  -2   3  15        4.53       10.45     31.52 o
  -1   3  15      234.17      163.42     49.71 o
   0   3  15      227.54      286.89     42.41 o
   1   3  15      204.86      216.69     39.10 o
   2   3  15        0.00      -13.56     26.63 o
   3   3  15      149.94       86.21     31.98 o
   4   3  15       58.35       69.36     29.23 o
   5   3  15       21.69       44.19     28.46 o
   6   3  15      111.47      143.77     33.58 o
   7   3  15       14.50        3.58     36.72 o
  -4   4  15       19.61      -15.76     32.37 o
  -3   4  15        5.66       15.12     33.27 o
  -2   4  15       31.94       42.22     34.53 o
  -1   4  15        0.91      -28.46     28.46 o
   0   4  15        2.71      -14.82     28.06 o
   1   4  15        0.00        1.25     27.60 o
   2   4  15        3.29        4.47     26.31 o
   3   4  15        6.75      -20.93     23.97 o
   4   4  15        5.01      -12.25     23.81 o
   5   4  15       19.60       28.62     28.13 o
   6   4  15      128.19      161.69     35.73 o
   7   4  15        7.06      -11.38     31.35 o
  -3   5  15        6.97       23.00     33.66 o
  -2   5  15        1.66      -16.60     31.28 o
  -1   5  15        4.19      -16.48     31.33 o
   0   5  15      146.33      141.67     37.38 o
   1   5  15      116.74       79.07     32.49 o
   2   5  15       11.52      -16.91     23.76 o
   3   5  15       47.09       20.57     24.76 o
   4   5  15       54.36       36.65     25.24 o
   5   5  15       83.45       74.18     27.61 o
   6   5  15       54.02       53.65     44.25 o
   7   5  15        4.62      -15.85     41.11 o
  -2   6  15        6.69       -4.39     46.40 o
  -1   6  15       12.73        9.67     47.92 o
   0   6  15      148.10      126.12     58.31 o
   1   6  15        8.23       17.47     46.94 o
   2   6  15      203.69      277.40     67.81 o
   3   6  15        0.21       15.94     47.20 o
   4   6  15      116.70       91.45     53.38 o
   5   6  15        1.03       -9.49     45.59 o
   6   6  15        1.83       63.15     49.26 o
   7   6  15       25.61       45.05     51.50 o
  -2   7  15       34.49      -18.54     49.53 o
  -1   7  15       64.75       88.85     59.83 o
   0   7  15       14.16      -23.20     46.22 o
   1   7  15       59.52       54.37     49.17 o
   2   7  15       12.27        9.49     50.16 o
   3   7  15        6.73       47.83     51.15 o
   4   7  15       27.64       55.44     52.13 o
   5   7  15        8.43      -16.03     45.59 o
   6   7  15       25.62       28.21     51.41 o
  -1   8  15        4.74      -27.86     48.82 o
   0   8  15        0.36       -7.43     51.06 o
   1   8  15       17.47        2.87     51.68 o
   2   8  15       47.14       69.60     56.52 o
   3   8  15      106.40       58.76     56.52 o
   4   8  15        1.98      -13.97     48.10 o
   5   8  15        1.82       71.48     55.80 o
   1   9  15        5.04       -1.16     48.55 o
   2   9  15        7.48       13.08     52.31 o
   3   9  15        3.52      -33.50     50.43 o
   4   9  15       28.06        0.36     53.74 o
  -1  -8  16        7.70       28.57     57.15 o
   0  -8  16        0.09      -42.81     42.81 o
   1  -8  16       19.72       77.57     54.82 o
   2  -8  16        9.99        3.05     45.50 o
  -3  -7  16        0.06      -10.84     57.15 o
  -2  -7  16       10.49      -20.60     50.88 o
  -1  -7  16        3.12        3.94     52.13 o
   0  -7  16        0.26      -11.20     49.80 o
   1  -7  16      135.91      197.24     66.19 o
   2  -7  16        6.74      -14.96     42.55 o
   3  -7  16       24.60       18.54     47.20 o
  -3  -6  16        0.44      -23.92     54.37 o
  -2  -6  16       16.68       18.72     53.83 o
  -1  -6  16       13.16       26.24     52.94 o
   0  -6  16        0.68      -14.87     45.68 o
   1  -6  16      480.51      439.97     81.24 o
   2  -6  16       23.02        9.67     46.04 o
   3  -6  16        1.53      -17.38     43.17 o
   4  -6  16       86.12       56.52     52.67 o
  -4  -5  16        2.05      -36.10     52.04 o
  -3  -5  16        8.09       63.77     57.41 o
  -2  -5  16        3.10       -8.06     52.40 o
  -1  -5  16        0.44      -17.11     49.89 o
   0  -5  16       49.63       74.61     57.06 o
   1  -5  16        0.65        5.91     46.31 o
   2  -5  16       24.08       11.20     46.49 o
   3  -5  16       64.17       83.57     53.21 o
   4  -5  16       31.16       80.26     54.01 o
   5  -5  16        5.77      -30.63     37.71 o
  -4  -4  16       25.09       28.84     58.22 o
  -3  -4  16        0.61       42.15     37.38 o
  -2  -4  16       27.41       23.80     33.44 o
  -1  -4  16      110.02       84.58     34.81 o
   0  -4  16        1.49        5.49     28.08 o
   1  -4  16      213.06      267.68     41.76 o
   2  -4  16        4.52       15.48     27.18 o
   3  -4  16       34.65       28.48     45.86 o
   4  -4  16       34.00       42.55     45.50 o
   5  -4  16        0.08      -26.78     39.41 o
   6  -4  16        2.67      -31.62     31.62 o
  -4  -3  16       23.25        8.95     35.08 o
  -3  -3  16        0.00        2.87     33.65 o
  -2  -3  16        0.80        3.87     31.72 o
  -1  -3  16       24.93       20.37     31.68 o
   0  -3  16       24.56        9.88     29.69 o
   1  -3  16       47.47       82.04     32.55 o
   2  -3  16      180.56      156.56     34.59 o
   3  -3  16       17.90        6.60     24.74 o
   4  -3  16       96.34       52.13     50.52 o
   5  -3  16        0.14      -21.50     39.68 o
   6  -3  16       22.62       43.26     49.00 o
  -4  -2  16        3.80       17.88     45.32 o
  -3  -2  16       29.07        8.49     46.98 o
  -2  -2  16       16.78       21.40     32.09 o
  -1  -2  16       35.35       26.85     30.78 o
   0  -2  16       22.26       12.60     32.65 o
   1  -2  16      102.89       79.59     41.56 o
   2  -2  16        9.78       -1.30     25.72 o
   3  -2  16        4.86       19.71     25.19 o
   4  -2  16       94.28      128.53     53.74 o
   5  -2  16       11.80       13.26     44.88 o
   6  -2  16       26.71       45.68     50.88 o
  -4  -1  16        5.81      -15.13     33.42 o
  -3  -1  16       87.80      103.28     40.79 o
  -2  -1  16        8.89        3.62     33.16 o
  -1  -1  16      131.09       88.95     36.55 o
   0  -1  16      456.79      440.19     73.58 o
   1  -1  16      151.60      208.15     38.93 o
   2  -1  16      151.02      182.65     36.95 o
   3  -1  16       29.55       32.05     27.70 o
   4  -1  16       83.50       92.78     30.41 o
   5  -1  16        5.00        9.76     44.34 o
   6  -1  16        9.54       -5.02     45.68 o
   7  -1  16      129.63      183.71     63.86 o
  -4   0  16        0.26       24.94     34.44 o
  -3   0  16        7.01       19.63     33.87 o
  -2   0  16       51.16       54.70     37.79 o
  -1   0  16        6.88        7.85     32.17 o
   0   0  16       38.96       31.03     31.96 o
   1   0  16       31.52       20.94     29.81 o
   2   0  16      711.58      684.90     56.04 o
   3   0  16       10.94        4.12     41.16 o
   4   0  16       93.17      104.47     30.88 o
   5   0  16      119.42      166.96     59.74 o
   6   0  16       11.99      -31.98     43.17 o
   7   0  16       14.55       21.05     46.04 o
  -4   1  16        9.02       -5.20     32.41 o
  -3   1  16       92.78       80.18     39.13 o
  -2   1  16        1.08        4.35     29.17 o
  -1   1  16        0.66       18.74     32.73 o
   0   1  16       63.36       48.61     32.54 o
   1   1  16       49.44       28.51     31.77 o
   2   1  16        0.68       31.70     29.66 o
   3   1  16       34.69       12.69     27.73 o
   4   1  16        0.45      -19.63     25.16 o
   5   1  16        0.42      -20.12     30.81 o
   6   1  16        0.31      -24.36     38.16 o
   7   1  16       37.25       36.63     48.10 o
  -4   2  16        0.70      -27.72     32.46 o
  -3   2  16       11.74       18.33     34.06 o
  -2   2  16       76.54       73.48     39.10 o
  -1   2  16        1.58        6.15     31.01 o
   0   2  16      149.50      161.18     39.41 o
   1   2  16       69.04       20.89     30.37 o
   2   2  16       98.14       70.49     32.10 o
   3   2  16        0.01       -9.21     26.37 o
   4   2  16        3.68      -17.95     25.71 o
   5   2  16        3.11       -3.63     27.39 o
   6   2  16       10.57      -21.41     37.53 o
   7   2  16        0.38      -32.34     37.71 o
  -3   3  16        0.37      -28.81     30.94 o
  -2   3  16        3.22      -19.32     32.69 o
  -1   3  16       74.34      120.52     39.87 o
   0   3  16       18.04       14.29     31.73 o
   1   3  16        5.30       -3.60     29.09 o
   2   3  16       26.42       20.03     35.20 o
   3   3  16      370.10      351.12     44.07 o
   4   3  16        6.72       -9.58     25.09 o
   5   3  16       43.68       60.02     32.36 o
   6   3  16       10.95       -2.40     28.71 o
   7   3  16        6.52       -3.94     35.92 o
  -3   4  16       29.78       29.97     35.67 o
  -2   4  16      114.53      144.62     41.96 o
  -1   4  16       64.07       47.41     35.11 o
   0   4  16       42.46       35.35     33.45 o
   1   4  16       71.51       77.01     33.58 o
   2   4  16      377.81      309.47     43.55 o
   3   4  16       48.73       28.70     27.81 o
   4   4  16       96.83       53.25     28.75 o
   5   4  16      116.50      127.95     34.51 o
   6   4  16       38.50       37.52     30.68 o
   7   4  16        6.57        0.18     36.28 o
  -2   5  16       12.71       -2.88     31.50 o
  -1   5  16        9.76      -15.11     31.49 o
   0   5  16       65.01       58.66     34.68 o
   1   5  16      140.02      118.23     34.52 o
   2   5  16        9.76        9.05     25.24 o
   3   5  16       95.43       44.22     31.62 o
   4   5  16       52.02       63.33     52.22 o
   5   5  16       59.55       -9.85     42.73 o
   6   5  16      100.51      110.26     54.73 o
   7   5  16        0.68      -12.54     47.11 o
  -2   6  16        2.14       -5.82     49.35 o
  -1   6  16        0.77      -13.08     41.38 o
   0   6  16       72.06       60.73     55.00 o
   1   6  16        9.26        3.76     41.92 o
   2   6  16      103.95      158.00     60.46 o
   3   6  16        1.90       -1.70     47.47 o
   4   6  16        6.92      -18.63     45.05 o
   5   6  16       12.25      -33.86     45.23 o
   6   6  16        8.32      -17.82     48.19 o
  -1   7  16        1.81      -15.23     49.80 o
   0   7  16        1.40       -6.81     43.80 o
   1   7  16        0.01        0.09     48.01 o
   2   7  16       16.85       14.69     50.79 o
   3   7  16       26.08       41.83     53.12 o
   4   7  16       70.78       54.10     55.09 o
   5   7  16        0.54       -1.25     48.37 o
   6   7  16        0.00      -22.66     49.26 o
   1   8  16       26.95      -11.20     51.15 o
   2   8  16       72.56      -14.06     51.95 o
   3   8  16       49.77       38.07     54.91 o
   4   8  16        0.55      -16.39     50.61 o
  -1  -7  17       31.08        5.11     51.95 o
   0  -7  17      124.94      100.77     60.64 o
   1  -7  17       27.01       37.26     54.37 o
   2  -7  17        6.48        6.54     48.28 o
  -2  -6  17        5.85      -48.64     48.64 o
  -1  -6  17       12.34       10.75     55.53 o
   0  -6  17       18.26      -33.77     46.04 o
   1  -6  17        6.07       32.87     51.06 o
   2  -6  17        3.35        9.49     47.11 o
   3  -6  17        1.08      -27.23     41.29 o
  -3  -5  17       65.42        7.79     57.68 o
  -2  -5  17        2.76      -48.73     48.73 o
  -1  -5  17       44.42       22.03     54.37 o
   0  -5  17        2.25      -22.39     47.74 o
   1  -5  17       46.28       31.08     51.86 o
   2  -5  17       16.52       -4.57     45.50 o
   3  -5  17       62.26       94.59     56.34 o
   4  -5  17       30.31       26.87     49.71 o
  -3  -4  17        0.36       -0.61     33.55 o
  -2  -4  17       25.57       76.91     39.32 o
  -1  -4  17        0.04       30.16     32.69 o
   0  -4  17       51.70       45.23     33.46 o
   1  -4  17        0.41        3.19     29.10 o
   2  -4  17       27.20       21.92     29.01 o
   3  -4  17        0.30       -1.88     46.04 o
   4  -4  17        2.57       23.47     47.11 o
   5  -4  17        0.81      -15.50     42.99 o
  -4  -3  17        0.10       17.32     36.45 o
  -3  -3  17       36.20       54.62     37.33 o
  -2  -3  17        0.09       -0.69     31.97 o
  -1  -3  17       93.53       92.23     38.24 o
   0  -3  17       54.29       77.50     33.99 o
   1  -3  17        0.36       12.47     30.35 o
   2  -3  17       39.17       21.96     28.00 o
   3  -3  17       64.05       37.36     30.19 o
   4  -3  17       17.24       58.04     50.70 o
   5  -3  17       53.72       52.13     51.32 o
   6  -3  17        0.00       33.05     48.55 o
  -4  -2  17       12.43       19.30     36.67 o
  -3  -2  17       12.20       23.95     36.01 o
  -2  -2  17       54.31       63.48     37.66 o
  -1  -2  17      288.21      226.29     45.22 o
   0  -2  17       25.30      -26.98     26.98 o
   1  -2  17       15.90       27.81     30.79 o
   2  -2  17        0.77       -7.35     27.20 o
   3  -2  17        0.27      -16.15     25.49 o
   4  -2  17        0.19       16.21     45.32 o
   5  -2  17        7.79       -6.54     42.64 o
   6  -2  17        5.81      -36.10     36.10 o
  -4  -1  17       30.75       -0.37     35.17 o
  -3  -1  17       17.58       13.73     34.48 o
  -2  -1  17       21.24       56.86     37.96 o
  -1  -1  17       57.97       33.85     34.90 o
   0  -1  17       49.17       27.96     32.02 o
   1  -1  17       32.63       35.38     32.77 o
   2  -1  17       57.07       57.59     31.41 o
   3  -1  17       59.56       17.09     29.38 o
   4  -1  17      140.88      130.70     35.76 o
   5  -1  17       12.49        8.42     46.04 o
   6  -1  17        6.02       24.54     50.61 o
  -4   0  17        8.55      -12.72     36.59 o
  -3   0  17       21.33        3.69     33.52 o
  -2   0  17        0.32      -17.94     32.62 o
  -1   0  17       48.25       71.51     38.13 o
   0   0  17      131.22      160.91     41.50 o
   1   0  17        4.17       14.76     29.98 o
   2   0  17       85.46       82.09     33.78 o
   3   0  17        0.03      -10.11     26.18 o
   4   0  17       34.53       17.66     28.80 o
   5   0  17        2.75       24.54     49.44 o
   6   0  17        0.18        0.18     45.41 o
  -3   1  17        0.12       -7.36     33.59 o
  -2   1  17        6.34      -10.96     33.66 o
  -1   1  17       50.48       16.17     35.73 o
   0   1  17      229.70      151.71     41.62 o
   1   1  17       96.93      146.09     38.07 o
   2   1  17       93.64       77.84     33.77 o
   3   1  17        1.42      -24.96     24.96 o
   4   1  17       65.71       50.06     30.34 o
   5   1  17       33.93       34.14     30.69 o
   6   1  17       85.50      167.77     61.89 o
   7   1  17       63.69       65.21     48.28 o
  -3   2  17       23.53       26.20     36.64 o
  -2   2  17       45.25       78.49     39.57 o
  -1   2  17       18.50      -12.23     33.54 o
   0   2  17      127.96      133.41     40.84 o
   1   2  17      124.48      104.44     37.45 o
   2   2  17      130.78      151.24     38.44 o
   3   2  17      196.49      217.15     51.10 o
   4   2  17       22.05       26.28     28.47 o
   5   2  17       45.42       44.77     30.30 o
   6   2  17       41.28      109.28     54.82 o
   7   2  17       30.19       34.40     47.02 o
  -3   3  17       46.15       41.76     36.74 o
  -2   3  17       14.59       -3.42     34.52 o
  -1   3  17       11.19       23.38     40.98 o
   0   3  17        7.00        9.88     34.08 o
   1   3  17       19.90       11.03     50.07 o
   2   3  17      146.17      158.86     38.48 o
   3   3  17      223.80      212.63     46.80 o
   4   3  17       12.66       26.63     28.79 o
   5   3  17       16.07      -24.08     27.41 o
   6   3  17        9.77       13.51     29.47 o
   7   3  17        2.80       18.45     38.87 o
  -2   4  17        0.23        6.24     36.55 o
  -1   4  17       66.97       65.00     39.08 o
   0   4  17       52.24       17.40     33.94 o
   1   4  17       23.18        2.50     31.63 o
   2   4  17      152.42      115.89     36.64 o
   3   4  17        0.03      -10.63     26.50 o
   4   4  17       95.20      100.22     33.45 o
   5   4  17       74.91       83.11     33.00 o
   6   4  17       68.91       52.98     32.65 o
  -2   5  17        4.22        1.51     37.37 o
  -1   5  17       83.85      103.92     41.33 o
   0   5  17       32.28       34.93     33.96 o
   1   5  17       49.33       27.70     30.38 o
   2   5  17       73.96       71.30     54.46 o
   3   5  17        0.14       51.32     50.97 o
   4   5  17       63.46       39.50     48.28 o
   5   5  17       38.60      -10.57     44.16 o
   6   5  17        4.91      -20.15     42.37 o
  -1   6  17        2.11       -8.87     46.67 o
   0   6  17        4.10      -23.83     45.86 o
   1   6  17        1.72      -18.63     45.05 o
   2   6  17        1.77       20.69     50.07 o
   3   6  17      100.89       22.03     51.59 o
   4   6  17        0.91      -11.55     48.82 o
   5   6  17        7.37       21.94     51.68 o
   0   7  17       76.88       80.70     59.30 o
   1   7  17        0.48       27.50     55.44 o
   2   7  17       11.18        9.58     53.12 o
   3   7  17        0.00        9.32     51.77 o
   4   7  17       26.04       73.99     58.94 o
   5   7  17        4.98       18.09     52.94 o
  -1  -6  18       27.65      -47.92     47.92 o
   0  -6  18        0.02      -43.17     46.04 o
   1  -6  18        7.50      -24.36     46.04 o
   2  -6  18       98.23      131.76     63.33 o
  -2  -5  18        1.12      -49.98     49.98 o
  -1  -5  18       14.79      -11.02     53.29 o
   0  -5  18        3.42      -46.76     46.76 o
   1  -5  18       24.01        1.70     51.32 o
   2  -5  18        0.00       24.36     49.53 o
   3  -5  18       56.42       69.69     56.70 o
   4  -5  18       40.86       65.12     55.80 o
  -2  -4  18        9.46       -3.50     35.94 o
  -1  -4  18        0.77       35.41     35.74 o
   0  -4  18        0.52      -33.41     33.41 o
   1  -4  18        3.31      -21.72     35.38 o
   2  -4  18       51.70       50.11     32.32 o
   3  -4  18        0.73       27.59     49.35 o
   4  -4  18       10.80       -7.61     43.35 o
  -3  -3  18       28.97       60.69     42.06 o
  -2  -3  18        0.06      -28.30     32.07 o
  -1  -3  18       10.35      -24.78     32.84 o
   0  -3  18       87.67      116.76     40.25 o
   1  -3  18       71.45      115.18     37.88 o
   2  -3  18       25.24       -1.55     35.07 o
   3  -3  18       59.79       86.17     57.95 o
   4  -3  18        2.75      -20.87     45.59 o
   5  -3  18        5.61      -34.93     41.92 o
  -3  -2  18       11.05       -1.31     35.31 o
  -2  -2  18        5.79       32.91     36.45 o
  -1  -2  18        0.78       -6.65     31.22 o
   0  -2  18        0.50      -20.18     30.15 o
   1  -2  18       75.60       55.57     35.04 o
   2  -2  18       83.25      102.43     35.47 o
   3  -2  18       75.98       37.95     46.67 o
   4  -2  18       13.48       22.48     47.56 o
   5  -2  18       15.22       13.97     48.01 o
  -3  -1  18        0.42       -2.18     50.03 o
  -2  -1  18        2.71        2.55     35.97 o
  -1  -1  18        0.31      -19.45     31.54 o
   0  -1  18      120.13      161.84     43.76 o
   1  -1  18       85.53       72.45     35.25 o
   2  -1  18       23.09       -9.52     31.01 o
   3  -1  18      126.87       98.96     36.08 o
   4  -1  18      125.06      154.60     59.92 o
   5  -1  18       12.01       12.90     45.68 o
   6  -1  18       47.03       16.75     45.50 o
  -3   0  18       17.55       20.62     36.41 o
  -2   0  18        0.09      -28.65     32.97 o
  -1   0  18       45.25      -12.80     32.69 o
   0   0  18       27.50       43.99     35.41 o
   1   0  18      109.55      126.18     40.96 o
   2   0  18       87.43      103.89     37.56 o
   3   0  18        0.52       19.70     30.27 o
   4   0  18        0.28       -0.73     28.86 o
   5   0  18      171.84      215.60     63.60 o
   6   0  18       91.93      135.16     63.51 o
  -3   1  18        0.27      -32.81     32.81 o
  -2   1  18       33.70       -1.26     34.63 o
  -1   1  18        4.34      -12.73     34.30 o
   0   1  18       43.61       55.66     39.48 o
   1   1  18        5.87      -28.93     30.81 o
   2   1  18       46.60        6.94     32.01 o
   3   1  18       14.37       10.68     32.02 o
   4   1  18       35.12       28.09     30.44 o
   5   1  18       38.38      -26.24     41.74 o
   6   1  18       72.76       91.45     58.76 o
  -2   2  18       19.51        7.21     37.22 o
  -1   2  18       65.17       82.37     41.44 o
   0   2  18        0.13      -27.18     40.75 o
   1   2  18       15.97       -7.80     31.68 o
   2   2  18       29.03       35.68     34.06 o
   3   2  18       27.00      -17.91     28.28 o
   4   2  18      301.59      308.17     45.11 o
   5   2  18       64.18       78.68     34.07 o
   6   2  18       24.62       24.01     48.19 o
  -2   3  18       12.37       24.62     38.77 o
  -1   3  18       44.51        5.64     37.30 o
   0   3  18       48.07       47.56     55.85 o
   1   3  18        3.99       31.16     34.32 o
   2   3  18      148.13      132.71     39.62 o
   3   3  18       29.55       41.09     35.78 o
   4   3  18       43.80       31.73     31.00 o
   5   3  18        0.20      -27.33     27.33 o
   6   3  18        0.01       19.35     42.46 o
  -1   4  18       95.36      120.36     43.60 o
   0   4  18        8.15      -15.49     35.69 o
   1   4  18        0.00      -22.59     30.50 o
   2   4  18       31.84       28.26     33.80 o
   3   4  18        0.67        6.98     28.66 o
   4   4  18       52.79       33.09     31.16 o
   5   4  18       30.02       14.24     46.85 o
   6   4  18        0.25      -20.33     44.07 o
  -1   5  18        0.42        9.76     50.25 o
   0   5  18        7.10        4.21     50.61 o
   1   5  18        1.58      -43.98     43.98 o
   2   5  18       39.72       39.95     52.31 o
   3   5  18       34.72      -45.86     45.86 o
   4   5  18       81.13       95.12     57.86 o
   5   5  18       21.45       24.01     49.71 o
   0   6  18       28.44       22.03     53.56 o
   1   6  18       13.00       21.05     52.58 o
   2   6  18       28.51       65.92     55.35 o
   3   6  18       58.84       44.07     57.77 o
   4   6  18       13.76        0.09     48.64 o
   2   7  18        0.01      -22.93     51.32 o
   3   7  18        6.54       36.72     55.44 o
   0  -5  19       34.56       -1.88     54.10 o
   1  -5  19        2.99       38.69     57.15 o
   2  -5  19        9.04       17.65     53.83 o
  -1  -4  19        3.19       -2.55     34.03 o
   0  -4  19        1.41      -13.63     32.22 o
   1  -4  19      198.59      291.75     47.43 o
   2  -4  19        0.88       20.82     31.83 o
   3  -4  19       20.49       26.51     52.85 o
  -2  -3  19       43.79      136.19     45.45 o
  -1  -3  19        1.22        4.53     35.94 o
   0  -3  19        0.11       -0.26     31.53 o
   1  -3  19       89.51       90.59     38.32 o
   2  -3  19        0.37       16.77     31.92 o
   3  -3  19       10.40      -32.69     46.67 o
   4  -3  19        5.73      -11.73     45.50 o
  -2  -2  19        0.48       16.79     35.19 o
  -1  -2  19        4.64        1.64     33.20 o
   0  -2  19        1.02      -11.29     33.32 o
   1  -2  19        4.21      -17.92     31.01 o
   2  -2  19        3.73       20.29     36.19 o
   3  -2  19       50.69      101.21     35.55 o
   4  -2  19       63.30       73.99     57.50 o
   5  -2  19        0.37       -8.69     45.59 o
  -2  -1  19       23.95       10.80     44.96 o
  -1  -1  19       28.36      -19.95     33.32 o
   0  -1  19       13.68       51.33     45.77 o
   1  -1  19      211.05      222.99     46.73 o
   2  -1  19        3.62        4.27     32.40 o
   3  -1  19       35.36       27.99     33.22 o
   4  -1  19        0.53      -12.63     45.23 o
   5  -1  19        2.04       -9.40     46.58 o
  -2   0  19        0.12      -25.81     34.18 o
  -1   0  19       38.93       70.33     40.73 o
   0   0  19       21.62       36.70     35.60 o
   1   0  19        4.59        4.07     35.59 o
   2   0  19       47.99       59.34     35.72 o
   3   0  19        0.00       -4.38     30.50 o
   4   0  19        6.17      -16.28     26.84 o
   5   0  19        5.67       -6.72     45.41 o
  -2   1  19        0.17      -32.23     32.23 o
  -1   1  19        6.57       22.85     37.91 o
   0   1  19        3.14        0.05     34.54 o
   1   1  19       20.68        6.54     35.16 o
   2   1  19        5.74      -15.11     31.42 o
   3   1  19       49.72       68.22     36.84 o
   4   1  19       23.81        3.96     29.60 o
   5   1  19       15.30       -3.94     46.31 o
  -1   2  19       76.54      101.27     44.29 o
   0   2  19        7.10      -22.88     33.53 o
   1   2  19        0.24      -30.71     30.71 o
   2   2  19      264.93      265.41     47.02 o
   3   2  19        8.41        0.69     31.43 o
   4   2  19       22.63       -4.73     31.01 o
   5   2  19        4.02        2.13     30.39 o
  -1   3  19        1.22      -20.61     35.32 o
   0   3  19      188.73      248.62     49.24 o
   1   3  19       14.87       13.75     34.76 o
   2   3  19       12.34      -29.64     29.64 o
   3   3  19       23.23       20.03     32.62 o
   4   3  19        0.13       -6.08     30.64 o
   5   3  19       48.83       22.05     33.99 o
   0   4  19        2.11        7.28     37.15 o
   1   4  19       46.67       14.75     35.29 o
   2   4  19       13.97       -2.18     32.14 o
   3   4  19       15.41        0.16     29.51 o
   4   4  19      110.76      153.61     62.34 o
   5   4  19      100.54      140.81     61.98 o
   1   5  19        0.59        0.27     48.82 o
   2   5  19       56.92       47.74     54.73 o
   3   5  19        0.19       -4.03     47.74 o
   4   5  19       39.86       38.96     51.41 o
   1  -4  20        0.12        6.18     33.42 o
   0  -3  20       33.73       13.73     35.82 o
   1  -3  20        2.58      -16.10     33.18 o
   2  -3  20        5.94        4.61     31.65 o
   3  -3  20        8.50       25.26     54.82 o
  -1  -2  20       18.59       18.95     37.76 o
   0  -2  20        0.00      -14.13     32.73 o
   1  -2  20        0.56      -20.87     34.22 o
   2  -2  20       37.93       62.91     37.15 o
   3  -2  20       61.09       59.65     55.62 o
   4  -2  20        5.06        7.61     56.25 o
  -1  -1  20        9.98       13.14     39.43 o
   0  -1  20        5.03      -16.91     34.09 o
   1  -1  20      185.52      211.74     46.75 o
   2  -1  20        6.29       -5.78     34.30 o
   3  -1  20        5.93      -12.25     30.86 o
   4  -1  20       14.12        7.34     51.77 o
  -1   0  20        0.44       -0.13     36.20 o
   0   0  20        0.23      -28.23     35.54 o
   1   0  20        2.41      -18.35     46.40 o
   2   0  20       33.31       -1.81     33.55 o
   3   0  20        2.95      -10.41     30.34 o
   4   0  20        0.16      -18.45     48.37 o
  -1   1  20        3.10        7.69     39.34 o
   0   1  20        0.26      -34.37     34.37 o
   1   1  20        3.63      -21.03     35.96 o
   2   1  20        2.37       -3.02     33.41 o
   3   1  20        5.40      -27.86     27.86 o
   4   1  20        0.12      -11.94     30.01 o
   0   2  20        3.74       -6.73     36.28 o
   1   2  20       26.36       -9.64     42.81 o
   2   2  20       48.88       16.84     35.23 o
   3   2  20        3.29      -26.91     31.71 o
   4   2  20       15.78       -9.79     31.92 o
   0   3  20        7.46      -25.17     36.14 o
   1   3  20        6.99      -33.93     34.80 o
   2   3  20       69.98        0.48     35.78 o
   3   3  20       10.35      -29.23     29.76 o
   4   3  20       13.74        8.75     33.31 o
   1   4  20       15.67      -36.46     45.68 o
   2   4  20        1.52        6.63     49.44 o
   3   4  20       19.42       25.80     54.10 o
   1  -1  21        0.02      -10.07     35.64 o
   2  -1  21       32.36       21.02     36.39 o
   1   0  21       14.09       -1.90     36.86 o
   2   0  21        7.24      -20.33     31.20 o
   1   1  21        0.91       -0.33     37.63 o
   2   1  21        2.71       -2.00     34.50 o
 
